# Supplementary material for: CD8+ T cell metabolic flexibility elicited by CD28-ARS2 axis-driven alternative splicing of PKM supports antitumor immunity
Source: Cell Mol Immunol. 2024 Jan 18;21(3):260–74. doi: 10.1038/s41423-024-01124-2 (PMC10902291; doi:10.1038/s41423-024-01124-2)
Supplement: Supplementary file 2 — Supplemental Tables [file 41423_2024_1124_MOESM2_ESM.xlsx]

## Sheet: Table S1
Table S1. Normalized expression of all genes with a MeanLog2CPM value > 3.321928 (10 CPM).
ENSEMBL_LCPM	gene_type	gene_name	MeanLog2CPM	WT_D0_1	WT_D0_2	WT_D1_1	WT_D1_4	WT_D3_1	WT_D3_4	ARS2_KO_D1_1	ARS2_KO_D1_2	ARS2_KO_D1_3	ARS2_KO_D3_1	ARS2_KO_D3_2	ARS2_KO_D3_3	CD28_AYAA_D1_1	CD28_AYAA_D1_2	CD28_AYAA_D1_3	CD28_AYAA_D3_1	CD28_AYAA_D3_2	CD28_AYAA_D3_3	CD28_KO_D1_1	CD28_KO_D1_2	CD28_KO_D3_1	CD28_KO_D3_2	CD28_Y170F_D1_1	CD28_Y170F_D1_2	CD28_Y170F_D1_3	CD28_Y170F_D3_1	CD28_Y170F_D3_2	CD28_Y170F_D3_3	DKI_D1_1	DKI_D1_2	DKI_D1_3	DKI_D3_1	DKI_D3_2	DKI_D3_3	seqnames	start	end	width	strand	source	type	score	phase
ENSMUSG00000000001.4	protein_coding	Gnai3	7.41282	7.41511	7.33824	7.35381	7.41571	7.58553	7.54942	7.33865	7.42834	7.39294	7.61932	7.79575	7.55212	7.38597	7.44505	7.34835	7.45306	7.4492	7.53715	7.22671	7.17444	7.45007	7.22855	7.36525	7.37436	7.35741	7.60957	7.75211	7.73242	7.44086	7.33251	7.37341	7.45735	7.33289	7.50845	chr3	108107280	108146146	38867	-	HAVANA	gene	NA	NA
ENSMUSG00000000028.14	protein_coding	Cdc45	4.3702	3.37157	3.59753	5.92202	5.17846	6.09144	5.67819	5.24107	5.50792	5.8033	5.81107	6.15149	5.85087	4.71932	4.80181	4.91705	6.01947	6.08146	6.1239	2.06253	2.76582	5.73878	5.60141	5.51251	5.42138	5.75141	6.21792	5.54295	5.12965	3.74744	3.33191	3.50062	6.09098	6.04467	5.82803	chr16	18780447	18811987	31541	-	HAVANA	gene	NA	NA
ENSMUSG00000000056.7	protein_coding	Narf	5.21451	5.47732	5.63952	4.19389	4.45491	6.08323	5.6723	4.66847	4.65232	4.51341	5.15998	4.88892	4.98497	4.69957	4.60985	4.63555	4.66	4.45704	4.93742	5.18101	4.98314	4.57392	4.52809	4.63632	4.49102	4.55841	5.85842	5.59167	6.00256	4.73768	4.71829	4.7662	4.56654	4.74617	4.64809	chr11	121237253	121255856	18604	+	HAVANA	gene	NA	NA
ENSMUSG00000000078.6	protein_coding	Klf6	7.32488	7.38259	7.15654	6.87822	6.98318	7.5439	7.33409	7.1429	7.14363	6.89792	7.61089	7.93561	7.41023	7.11486	7.66641	7.21469	7.52536	7.54822	7.51484	8.04173	7.88487	7.45392	7.5143	6.84017	7.59834	6.93785	7.34127	7.30612	7.33236	7.46125	7.55177	7.55406	7.22507	7.20337	7.45468	chr13	5861489	5870393	8905	+	ENSEMBL	gene	NA	NA
ENSMUSG00000000085.16	protein_coding	Scmh1	3.42703	3.02073	3.09142	4.16228	3.96099	3.36283	3.39556	3.93991	3.9426	4.20632	3.55516	3.51131	3.78483	3.94892	3.97965	4.01838	3.68336	3.88257	3.65024	4.04336	3.88589	3.91477	3.8591	4.10649	4.07145	4.15602	3.60847	3.59996	3.28263	3.71869	3.66081	3.77111	3.63822	3.57994	3.65342	chr4	120405281	120530186	124906	+	HAVANA	gene	NA	NA
ENSMUSG00000000088.6	protein_coding	Cox5a	5.48904	4.97468	4.97556	6.16608	6.13714	6.39154	5.88056	5.88303	6.11693	6.2635	6.40549	6.7568	6.11899	5.71373	5.75064	5.66584	6.5271	6.61487	6.64637	4.35197	4.5542	6.26977	6.07542	5.89438	6.0846	6.0309	6.62393	5.71311	5.68842	5.35687	5.34132	5.39509	6.58972	6.53366	6.55292	chr9	57521232	57532424	11193	+	ENSEMBL	gene	NA	NA
ENSMUSG00000000131.15	protein_coding	Xpo6	7.5913	7.4283	7.42034	7.81111	7.83909	7.63569	7.63216	7.7544	7.7894	7.91297	7.65402	7.65815	7.76487	7.83806	7.84486	7.73711	7.77671	7.68972	7.63554	7.80285	7.78815	7.70321	7.67936	7.84814	7.89493	7.6999	7.75952	7.73702	7.71857	7.82719	7.82571	7.77586	7.76475	7.74498	7.72075	chr7	126101715	126200501	98787	-	HAVANA	gene	NA	NA
ENSMUSG00000000134.17	protein_coding	Tfe3	4.73745	4.53825	4.59857	4.9739	5.14128	4.84723	5.01455	4.86362	4.87344	4.96306	4.77578	4.90741	5.00053	4.87585	4.82061	4.9236	4.53471	4.8113	4.81228	4.93464	4.82764	4.88247	4.92621	5.17632	5.08911	5.04839	4.86073	5.17207	4.87708	5.05765	4.90799	5.00464	4.78901	4.71548	4.59937	chrX	7762560	7775202	12643	+	HAVANA	gene	NA	NA
ENSMUSG00000000142.15	protein_coding	Axin2	5.11527	5.03968	5.10177	4.67908	4.82687	5.47806	5.43204	5.0483	4.74275	4.37649	5.18693	4.58101	5.58579	5.1643	5.03289	5.26325	5.26136	5.11768	4.94277	6.09547	6.04662	5.14807	5.47539	4.78855	4.82342	4.94457	5.48868	5.29809	5.36287	5.2707	5.31381	5.32173	4.91546	4.99225	5.10897	chr11	108920349	108950783	30435	+	HAVANA	gene	NA	NA
ENSMUSG00000000148.17	protein_coding	Brat1	4.98075	5.46543	5.359	4.55642	4.65285	4.26243	4.13887	4.6343	4.68782	4.45593	4.65553	4.46107	4.39691	4.73326	4.57707	4.59787	4.45876	4.53944	4.39167	4.85944	4.98091	4.64197	4.54084	4.79997	4.54837	4.60884	4.28568	4.22955	4.29671	4.59206	4.89718	4.74244	4.61506	4.3328	4.40515	chr5	140705011	140719379	14369	+	HAVANA	gene	NA	NA
ENSMUSG00000000149.10	protein_coding	Gna12	4.46487	4.82681	4.98395	4.32093	4.33968	3.17929	3.74892	4.39081	4.40246	4.2445	3.95696	4.21701	3.53879	4.22428	4.26191	4.02168	4.06594	3.82814	3.83562	4.2004	4.28633	3.89841	3.99469	4.44135	4.42552	4.26391	3.63406	3.40189	3.3547	4.14822	4.30903	4.46189	4.01967	3.8201	3.54255	chr5	140758408	140830431	72024	-	HAVANA	gene	NA	NA
ENSMUSG00000000168.9	protein_coding	Dlat	5.1937	5.08806	5.26572	5.63748	5.47894	5.23443	4.92822	5.18168	5.183	5.62277	5.46198	5.6091	5.04786	5.0284	5.0883	5.11678	5.41919	5.32737	5.54929	4.53006	4.6221	5.49955	5.22846	5.34642	5.47495	5.49759	5.30812	4.57241	4.72042	4.80761	4.9026	4.9118	5.40031	5.38905	5.61033	chr9	50634633	50659780	25148	-	HAVANA	gene	NA	NA
ENSMUSG00000000171.4	protein_coding	Sdhd	5.91355	5.89654	5.92571	6.23404	5.9242	6.34761	6.01481	5.78744	5.99746	6.1679	6.20632	6.53053	6.12049	5.53925	5.73647	5.57308	6.37138	6.37604	6.3757	4.60018	4.74574	6.08582	5.86033	5.90089	6.04348	5.9914	6.5903	5.84921	5.75243	5.2474	5.2892	5.25611	6.32043	6.25674	6.21878	chr9	50596338	50603849	7512	-	ENSEMBL	gene	NA	NA
ENSMUSG00000000184.12	protein_coding	Ccnd2	8.58226	7.60138	7.58525	10.3025	10.374	8.84367	8.53978	10.0613	10.098	10.4184	9.57511	9.66342	9.29607	9.94163	9.955	9.88557	9.63242	9.57349	9.48405	8.56196	8.74732	9.42011	9.14813	10.3067	10.381	10.2232	8.89225	8.47347	8.28873	9.75157	9.73495	9.82202	9.60713	9.63309	9.64257	chr6	127125162	127152193	27032	-	HAVANA	gene	NA	NA
ENSMUSG00000000194.13	protein_coding	Gpr107	5.73733	5.92373	5.881	5.28838	5.7337	5.44472	5.83045	5.61768	5.60156	5.48308	5.53077	5.2507	5.76918	5.80329	5.4798	5.46583	5.39745	5.2183	5.22222	5.99424	5.84298	5.35295	5.39466	5.61651	5.39675	5.39458	5.39348	5.93371	5.93677	5.86711	5.85078	5.87912	5.34234	5.50428	5.47583	chr2	31152316	31218775	66460	+	HAVANA	gene	NA	NA
ENSMUSG00000000244.17	protein_coding	Tspan32	6.94181	7.3619	7.31319	6.27269	6.7947	6.07107	6.40915	6.76979	6.52147	6.25	6.09975	5.45874	6.46183	7.37119	6.9038	7.04851	6.22379	5.97637	5.65839	7.66622	7.53321	5.96849	6.32358	7.01617	6.6851	6.61405	6.15604	6.78578	6.51438	7.38361	7.34947	7.32062	5.9586	6.02795	5.88014	chr7	143005046	143019644	14599	+	HAVANA	gene	NA	NA
ENSMUSG00000000275.16	protein_coding	Trim25	6.41753	5.80952	6.00831	6.59421	6.65414	7.49348	7.95986	6.73978	6.70875	6.68646	6.70519	6.87946	7.30526	6.57003	6.55473	6.60054	6.88308	7.02645	7.37093	6.64496	6.68752	6.72631	6.66728	6.61104	6.58957	6.58166	7.54474	7.94444	8.07364	6.63482	6.77184	6.67263	6.90117	6.94567	6.9069	chr11	88999376	89020293	20918	+	HAVANA	gene	NA	NA
ENSMUSG00000000276.11	protein_coding	Dgke	5.10451	5.38099	5.33432	4.65675	4.74496	4.33802	4.24585	4.94778	4.96163	4.82543	4.72888	4.93109	4.66757	4.90817	5.03497	4.97069	4.79203	4.94358	4.85647	5.53614	5.42754	4.84145	4.94552	4.80224	4.81045	4.69736	4.41335	4.66639	4.7787	5.06147	5.19522	5.11517	4.78901	4.80568	4.80435	chr11	89035179	89066850	31672	-	HAVANA	gene	NA	NA
ENSMUSG00000000278.10	protein_coding	Scpep1	4.01418	3.57827	3.48843	4.22483	3.97796	6.29641	6.26424	4.19857	4.49891	4.26226	5.25218	5.49395	6.08931	3.37541	3.17864	3.4212	4.97511	5.345	5.51853	2.13989	2.5536	4.46308	4.47858	3.98767	4.08874	3.97359	6.40189	6.31072	6.17568	2.70946	2.64573	3.11287	4.92991	4.72578	4.77051	chr11	88924020	88955465	31446	-	HAVANA	gene	NA	NA
ENSMUSG00000000282.12	protein_coding	Mnt	5.01829	4.43468	4.53313	5.28667	5.38344	5.70201	5.88076	5.67427	5.67376	5.37044	5.42171	5.42377	5.85182	5.56599	5.59488	5.46958	5.36422	5.66735	5.44242	5.94732	5.84015	5.36131	5.61595	5.27946	5.33166	5.2525	5.56979	5.68572	5.67717	5.69146	5.87578	5.76374	5.34745	5.42428	5.24894	chr11	74830920	74845725	14806	+	HAVANA	gene	NA	NA
ENSMUSG00000000290.13	protein_coding	Itgb2	8.12798	8.37235	8.34578	7.84951	7.72936	8.07209	7.99213	7.74292	7.88118	7.78913	8.2319	8.48613	7.87303	7.73614	7.67418	7.70233	8.12268	8.17913	8.24406	7.41501	7.36262	8.1702	8.07501	7.75321	7.63078	7.8564	7.96562	7.92828	7.9649	7.54484	7.65888	7.60354	8.19949	8.16838	8.09732	chr10	77530252	77565708	35457	+	HAVANA	gene	NA	NA
ENSMUSG00000000295.12	protein_coding	Hddc2	3.78356	3.81164	3.77642	3.98966	3.24664	3.9852	3.45166	3.89436	3.79417	4.28644	4.03911	4.16175	3.89655	3.83973	4.13039	3.84081	3.75838	4.00362	4.10676	3.46996	3.50132	3.74337	3.54151	3.85945	3.68487	3.85983	3.89976	3.37669	3.36433	3.62884	3.46967	3.45748	3.96269	3.6893	3.80436	chr10	31313382	31328204	14823	+	HAVANA	gene	NA	NA
ENSMUSG00000000326.12	protein_coding	Comt	4.0827	4.29512	4.28181	4.16912	4.04955	4.03049	3.92678	3.56553	3.95707	4.07823	4.22189	4.56382	3.89492	3.59144	3.70803	3.647	4.04507	4.28476	4.40839	2.90501	3.16206	4.15994	4.00908	3.99087	3.90553	4.03541	4.36147	3.36444	3.62343	3.22764	3.52691	3.16743	4.32507	4.06615	4.08951	chr16	18406886	18426852	19967	-	HAVANA	gene	NA	NA
ENSMUSG00000000339.14	protein_coding	Rtca	4.0417	4.03278	3.9899	4.35846	4.0347	4.327	4.10822	3.92681	4.10122	4.38054	4.42721	4.66949	4.31561	3.67073	3.67417	3.749	4.51093	4.70085	4.59741	3.03564	3.35323	4.37682	4.24206	4.08764	4.29926	4.13827	4.39816	3.88682	3.83701	3.25819	3.42565	3.34283	4.47027	4.33158	4.27034	chr3	116488963	116508208	19246	-	HAVANA	gene	NA	NA
ENSMUSG00000000340.10	protein_coding	Dbt	4.34273	4.27667	4.15892	4.58488	4.46698	4.26243	4.17264	4.41532	4.52858	4.63375	4.69361	4.94726	4.58745	4.41813	4.20739	4.30565	4.60143	4.7228	4.73617	3.939	4.19448	4.67685	4.44099	4.46897	4.59449	4.48925	4.39536	4.19753	4.41006	4.27416	4.108	4.44403	4.53537	4.77127	4.74087	chr3	116513070	116549981	36912	+	HAVANA	gene	NA	NA
ENSMUSG00000000346.8	protein_coding	Dazap2	7.49472	7.50849	7.48833	7.24451	7.29308	7.84262	7.80293	7.46282	7.44633	7.39016	7.5442	7.69107	7.79417	7.407	7.53173	7.38753	7.48544	7.56972	7.55679	7.26714	7.35617	7.42373	7.49445	7.31638	7.34094	7.23642	7.84514	7.72272	7.71857	7.40972	7.45555	7.42471	7.41173	7.39475	7.44475	chr15	100615628	100620731	5104	+	ENSEMBL	gene	NA	NA
ENSMUSG00000000355.13	protein_coding	Mcts1	4.70494	4.5458	4.70451	4.9539	4.80801	4.93708	4.44553	4.68734	4.88572	5.17219	4.92089	5.15337	4.78198	4.69672	4.99416	4.85451	4.98139	4.9057	4.97276	4.06335	4.19448	4.81037	4.57842	4.87748	4.84647	4.78539	4.88672	4.60804	4.69433	4.7281	4.62961	4.57089	5.02275	4.77127	4.89237	chrX	38600578	38613426	12849	+	HAVANA	gene	NA	NA
ENSMUSG00000000374.7	protein_coding	Trappc10	6.41932	6.55503	6.59278	6.18769	6.25181	6.10413	6.07854	6.29232	6.39758	6.23932	6.45604	6.50708	6.31753	6.12485	6.18483	6.15154	6.44363	6.54981	6.34905	6.17458	6.24035	6.35652	6.41089	6.22533	6.2997	6.15485	6.10252	6.07748	5.97357	6.16091	6.23478	6.16779	6.40736	6.47099	6.37811	chr10	78186725	78244642	57918	-	ENSEMBL	gene	NA	NA
ENSMUSG00000000378.15	protein_coding	Ccm2	6.83955	7.00219	7.06777	6.30352	6.61399	6.49112	6.76669	6.6362	6.48693	6.23389	6.44882	6.04782	6.73921	7.01965	6.78032	6.86414	6.29028	6.38459	6.1779	7.49079	7.34665	6.45852	6.76071	6.65132	6.49549	6.51502	6.64589	7.01606	7.04759	7.00689	7.04107	6.99146	6.33498	6.39231	6.13199	chr11	6546887	6596744	49858	+	HAVANA	gene	NA	NA
ENSMUSG00000000384.15	protein_coding	Tbrg4	5.41221	5.16334	5.2086	6.10072	5.8962	5.35721	4.71134	5.72303	5.93523	6.0047	5.84842	6.22292	5.44622	5.57986	5.60222	5.46834	6.09144	6.21898	6.13337	4.80703	5.02554	6.0163	6.03143	5.90602	5.93213	5.90431	5.43136	4.62501	4.30656	5.2324	5.24818	5.25384	6.15068	6.15092	6.06879	chr11	6615598	6626067	10470	-	HAVANA	gene	NA	NA
ENSMUSG00000000399.10	protein_coding	Ndufa9	5.75264	5.59772	5.59909	5.89168	5.86613	6.46466	6.21039	5.78453	5.78118	5.87582	6.22009	6.37849	6.02063	5.59377	5.68611	5.61141	6.31451	6.36478	6.38622	4.98005	5.01408	5.98381	6.0118	5.76414	5.85176	5.78412	6.49001	5.94446	5.81794	5.27399	5.44953	5.3056	6.26069	6.28838	6.34894	chr6	126821721	126849136	27416	-	HAVANA	gene	NA	NA
ENSMUSG00000000409.14	protein_coding	Lck	8.67417	8.63089	8.47752	8.52844	8.45032	9.21583	9.09123	8.63519	8.60618	8.41739	9.00986	9.11726	8.90259	8.59116	8.59485	8.53919	8.99987	9.09824	9.02129	8.66864	8.57204	8.84104	8.82417	8.52344	8.68936	8.56001	9.22168	9.08452	9.07731	8.56582	8.58339	8.60237	8.97309	8.95447	8.85191	chr4	129548344	129573641	25298	-	HAVANA	gene	NA	NA
ENSMUSG00000000420.15	protein_coding	Galnt1	7.14549	7.13477	7.22044	7.19425	7.13181	7.12021	6.82626	7.14859	7.19233	7.08791	7.32972	7.51451	6.98745	7.05893	7.17526	7.12906	7.37217	7.34725	7.34385	6.64164	6.80654	7.32886	7.24578	7.15231	7.06666	7.14719	7.12721	6.81208	6.73657	6.99295	6.78656	6.94407	7.30395	7.20981	7.36603	chr18	24205344	24286818	81475	+	HAVANA	gene	NA	NA
ENSMUSG00000000439.9	protein_coding	Mkrn2	5.89063	6.05915	5.96287	5.64184	5.73906	5.7504	5.56199	5.75797	5.65156	5.64086	5.80496	5.62735	5.57039	5.72855	5.9269	5.78439	5.80178	5.75604	5.75205	6.07132	5.91729	5.79846	5.9355	5.73912	5.88868	5.5894	5.79264	5.71379	5.71276	5.74129	5.99484	5.95037	5.66293	5.85112	5.79278	chr6	115601902	115622624	20723	+	HAVANA	gene	NA	NA
ENSMUSG00000000441.17	protein_coding	Raf1	6.79612	6.92951	6.92639	6.65918	6.75905	6.5243	6.69111	6.69106	6.76267	6.80522	6.64988	6.7077	6.56798	6.63102	6.64847	6.61419	6.7118	6.71989	6.65237	6.60037	6.6799	6.65789	6.64895	6.66005	6.78003	6.7104	6.72552	6.50546	6.54056	6.66195	6.58094	6.5851	6.70972	6.74647	6.66811	chr6	115618067	115676635	58569	-	HAVANA	gene	NA	NA
ENSMUSG00000000486.13	protein_coding	1-Sep	7.9672	8.10604	8.13332	7.60078	7.53591	8.09224	7.97249	7.66677	7.71393	7.54257	8.01201	8.1175	7.98692	7.65569	7.70959	7.62516	8.09472	8.07145	8.08883	7.54068	7.56047	7.96177	8.08091	7.61165	7.5938	7.58759	8.1439	8.07697	7.99406	7.47493	7.55436	7.48682	7.95933	8.07222	7.88504	chr7	127214447	127233130	18684	-	HAVANA	gene	NA	NA
ENSMUSG00000000530.16	protein_coding	Acvrl1	3.48163	4.1216	4.00898	2.16725	2.78899	3.99691	3.07681	2.80237	2.71022	2.47673	3.85982	3.42669	3.82421	2.92876	2.19334	2.62776	3.57131	3.16635	2.95045	2.88728	2.82684	2.51103	1.66213	2.8932	2.71763	2.28013	3.2296	2.51606	2.89983	2.50016	2.64573	2.73343	3.20315	3.43673	3.22417	chr15	101128522	101145336	16815	+	HAVANA	gene	NA	NA
ENSMUSG00000000532.10	protein_coding	Acvr1b	4.98031	5.23729	5.08547	4.8074	5.11467	4.50585	4.38199	4.84693	4.7479	4.41813	4.30326	3.92825	3.82421	5.44242	5.27364	5.40246	4.50015	4.25382	4.46299	5.67906	5.60929	4.59123	4.65548	5.0915	5.05213	4.9302	4.26601	4.13503	4.50318	5.40908	5.56676	5.62116	4.67349	4.90878	4.66923	chr15	101174067	101213679	39613	+	HAVANA	gene	NA	NA
ENSMUSG00000000538.18	protein_coding	Tom1l2	4.63679	4.72302	4.72514	4.16356	4.53451	4.31014	4.76623	4.75651	4.65956	4.24663	4.24033	3.7956	4.14624	4.87331	4.85439	4.98771	4.2071	4.15126	4.16369	5.38658	5.30601	4.09936	4.38399	4.77868	4.64348	4.53664	4.40255	5.00893	4.85605	5.00533	4.89718	4.80113	4.06839	4.35879	4.19421	chr11	60226714	60352905	126192	-	HAVANA	gene	NA	NA
ENSMUSG00000000561.14	protein_coding	Wdr77	6.04136	5.90827	6.00735	6.64908	6.47354	5.39404	4.99226	6.21759	6.37389	6.48926	6.1759	6.37477	5.69655	6.24014	6.13996	6.17791	6.24813	6.42896	6.34759	5.99332	6.12424	6.30227	6.1849	6.56502	6.60284	6.60654	5.27305	4.87848	5.03359	6.197	6.37373	6.18098	6.43203	6.39158	6.43772	chr3	105959369	105970037	10669	+	HAVANA	gene	NA	NA
ENSMUSG00000000563.17	protein_coding	Atp5f1	7.22122	7.02737	7.02832	7.52307	7.20306	7.90257	7.49384	7.28179	7.41824	7.48989	7.75114	8.05559	7.70415	7.07716	7.10423	7.21787	7.78102	7.86991	7.94178	6.31682	6.53137	7.59223	7.48561	7.36235	7.3011	7.4392	7.92958	7.43114	7.34901	6.82886	6.80859	6.89318	7.75583	7.66516	7.76203	chr3	105942698	105960099	17402	-	HAVANA	gene	NA	NA
ENSMUSG00000000568.15	protein_coding	Hnrnpd	6.84399	5.65719	5.68005	8.30782	7.99884	8.1731	7.47267	7.96289	8.07667	8.2818	8.16917	8.47339	8.10839	7.84952	7.9531	8.00311	8.42663	8.47224	8.48796	7.2443	7.34093	8.2888	8.24013	8.08593	7.94351	8.16786	8.18187	7.4762	7.28722	7.65705	7.60664	7.66166	8.38662	8.33705	8.49629	chr5	99955935	99978938	23004	-	HAVANA	gene	NA	NA
ENSMUSG00000000579.14	protein_coding	Dynlt1c	4.71151	5.12735	5.21609	3.81469	3.98125	4.2364	4.88543	4.25827	4.08478	3.49315	4.38249	4.15301	4.6571	4.21358	3.79866	4.34173	3.96444	3.86466	3.82537	5.15553	5.1648	4.04598	4.40562	4.08114	3.74395	4.05384	4.39515	4.81039	5.02683	4.40761	4.46531	4.37461	3.89446	4.0672	3.99448	chr17	6601671	6609774	8104	+	HAVANA	gene	NA	NA
ENSMUSG00000000581.8	protein_coding	C1d	4.71445	4.8756	4.73019	4.66498	4.2466	4.93708	4.45928	4.61032	4.56148	4.8641	4.95891	5.14405	4.63915	4.53737	4.56039	4.34517	5.07827	5.00287	5.09808	3.78496	3.91896	4.84507	4.60781	4.61578	4.82342	4.72169	4.98222	4.51583	4.61588	4.24757	4.108	4.50885	4.7186	4.35952	4.94965	chr11	17257579	17269176	11598	+	HAVANA	gene	NA	NA
ENSMUSG00000000594.7	protein_coding	Gm2a	6.57123	7.00958	6.99703	5.67563	5.52874	7.12243	7.01261	6.0003	6.13561	5.53213	6.60034	6.54063	6.71794	5.77051	5.87779	5.88721	6.0714	6.15403	6.06862	6.02329	6.08251	5.98217	5.90933	5.76063	5.67133	5.79448	6.86492	7.0964	7.09971	5.79836	5.94304	5.70039	5.94205	6.07118	6.01715	chr11	55098115	55113029	14915	+	HAVANA	gene	NA	NA
ENSMUSG00000000600.15	protein_coding	Krit1	7.14814	7.15194	7.22376	6.82737	7.16832	7.23135	7.55983	7.03694	6.8161	6.91547	6.98477	6.65936	7.36489	7.27881	7.08583	7.18368	6.91894	6.75798	6.8233	7.33348	7.46333	6.92801	6.82153	6.97475	6.91562	6.92795	7.14796	7.68665	7.86142	7.41272	7.48021	7.40876	6.86401	6.71812	6.91245	chr5	3803184	3845564	42381	+	HAVANA	gene	NA	NA
ENSMUSG00000000605.9	protein_coding	Clcn4	6.28406	6.55253	6.54325	5.86124	6.11908	5.76546	5.89684	6.28554	6.08989	5.88782	5.96489	5.99252	5.80092	6.25839	6.06979	6.18563	5.90285	5.87637	5.8152	6.26973	6.38547	6.00841	6.06748	6.1123	5.89271	5.88294	5.64985	5.9342	5.96376	6.2684	6.33665	6.35162	5.91803	5.98028	5.85328	chr7	7282309	7300851	18543	-	HAVANA	gene	NA	NA
ENSMUSG00000000627.15	protein_coding	Sema4f	3.71309	3.38974	3.3627	3.84874	3.92643	4.10905	4.95272	4.57022	4.3606	3.75197	4.14735	3.74304	4.13723	3.92967	4.27369	4.3773	3.55457	3.52152	3.46905	4.02308	4.10699	3.66786	3.6396	3.84942	3.88614	3.96546	3.79387	4.83312	5.149	4.28727	4.15415	4.28861	3.71813	3.93115	3.63204	chr6	82911885	82939769	27885	-	HAVANA	gene	NA	NA
ENSMUSG00000000628.10	protein_coding	Hk2	4.10264	3.12926	2.92346	6.56539	5.89769	5.97787	3.77114	5.14877	5.83599	6.36528	5.88369	6.55301	5.34583	4.51494	4.60985	4.69285	5.85602	6.15172	6.19147	1.77792	2.65802	5.82089	5.61956	6.19451	6.27631	6.17877	5.32723	3.06588	2.55015	4.06927	4.04081	4.3528	6.23569	6.08926	6.10703	chr6	82725025	82774454	49430	-	HAVANA	gene	NA	NA
ENSMUSG00000000631.20	protein_coding	Myo18a	6.16334	6.4507	6.42066	5.78911	5.48192	6.30664	6.01014	5.61088	5.69135	5.64632	6.23695	6.38773	6.16487	5.74044	5.63127	5.73806	6.44967	6.2785	6.40898	5.18101	5.34651	6.17321	5.99244	6.01505	6.05011	5.88234	6.33661	5.76675	6.01948	5.24404	5.29745	5.23923	6.04966	6.31592	6.02946	chr11	77763246	77865980	102735	+	HAVANA	gene	NA	NA
ENSMUSG00000000682.7	protein_coding	Cd52	8.05355	8.62359	8.57299	7.93532	7.64287	7.6086	7.53813	7.52599	7.63339	7.80961	7.44611	7.70302	7.27503	7.62573	7.56311	7.49466	7.45869	7.5261	7.5342	6.80047	7.00549	7.40947	7.51139	7.9053	7.90137	7.8146	7.53381	7.73269	7.63393	7.11196	7.18805	7.23231	7.38225	7.44785	7.35057	chr4	134082448	134095082	12635	-	HAVANA	gene	NA	NA
ENSMUSG00000000708.14	protein_coding	Kat2b	6.36382	6.32422	6.31028	6.09407	6.4258	6.36276	6.57639	6.55689	6.43982	6.27446	6.67504	6.2248	6.76471	6.51458	6.40786	6.50416	6.41917	6.15094	6.15884	6.48365	6.6302	6.34253	6.35349	6.47088	6.35253	6.191	6.20593	6.55771	6.5886	6.47064	6.49176	6.54278	6.24536	6.32103	6.3341	chr17	53566861	53672720	105860	+	HAVANA	gene	NA	NA
ENSMUSG00000000711.2	protein_coding	Rab5b	6.02705	6.29467	6.18953	5.66367	5.91511	6.04756	6.05945	5.79769	5.71615	5.31439	5.46061	5.45186	5.27865	6.03636	5.95314	6.011	5.59177	5.50864	5.64308	6.29962	6.17966	5.61913	5.64774	5.91732	5.90005	5.78501	6.00438	6.13804	6.30303	6.12086	6.17987	6.05337	5.34659	5.66746	5.37278	chr10	128677193	128696268	19076	-	ENSEMBL	gene	NA	NA
ENSMUSG00000000732.8	protein_coding	Icosl	3.75886	5.57281	5.22591	1.9285	1.36772	0.276354	0.183704	2.9486	2.69634	1.78993	3.16304	3.50646	1.68696	1.87756	1.95894	2.79884	2.52639	2.65119	2.91455	2.81836	3.03939	3.27654	2.90819	2.27418	1.47404	2.41751	0.543197	-0.278003	0.179078	2.14433	2.08418	2.25123	2.73924	2.9662	2.6745	chr10	78069360	78079525	10166	+	ENSEMBL	gene	NA	NA
ENSMUSG00000000738.17	protein_coding	Spg7	5.53167	5.74865	5.71971	5.09452	5.06391	5.46407	5.50676	5.49664	5.45431	5.21691	5.45867	5.35	5.63425	5.49901	5.34517	5.38519	5.41611	5.36242	5.30636	5.51451	5.4823	5.13209	5.31562	5.0803	5.22821	5.0368	5.53871	5.53158	5.41811	5.19965	5.17298	5.43726	5.13929	5.13441	5.11669	chr8	123062942	123097760	34819	+	HAVANA	gene	NA	NA
ENSMUSG00000000740.11	protein_coding	Rpl13	9.84315	9.95993	9.96874	9.71421	9.67717	9.79389	9.79729	9.99283	9.89405	9.76207	9.87417	9.84408	9.73756	9.82493	9.89858	9.81055	9.63012	9.74392	9.70118	9.43558	9.61043	9.54756	9.57788	9.74167	9.59384	9.69733	9.88268	9.81707	9.72865	9.61853	9.61948	9.68967	9.65685	9.67917	9.50976	chr8	123102350	123105244	2895	+	HAVANA	gene	NA	NA
ENSMUSG00000000743.8	protein_coding	Chmp1a	6.02486	6.4201	6.31475	5.49363	5.69706	5.55399	5.6723	5.8343	5.76963	5.61085	5.78661	5.79234	5.80926	5.75145	5.65372	5.68385	5.6176	5.62908	5.65098	5.6562	5.75375	5.67524	5.68875	5.70934	5.65833	5.76318	5.60153	5.7324	5.81915	5.52709	5.76118	5.6629	5.58823	5.75379	5.47583	chr8	123204264	123212763	8500	-	HAVANA	gene	NA	NA
ENSMUSG00000000751.13	protein_coding	Rpa1	7.4722	7.23112	7.24258	7.85334	7.41259	8.20674	8.01965	7.50184	7.62815	7.73222	7.83528	8.13487	8.00888	7.43072	7.45899	7.51069	7.95659	7.97808	8.01891	7.17653	7.31772	7.81566	7.62681	7.56723	7.56128	7.73349	8.31497	7.84718	7.8327	7.11656	7.19359	7.07827	7.89816	7.96157	7.91245	chr11	75298166	75348324	50159	-	HAVANA	gene	NA	NA
ENSMUSG00000000759.14	protein_coding	Tubgcp3	6.32987	6.30746	6.29012	6.29824	6.26743	6.34837	6.34421	6.43004	6.35847	6.32718	6.32934	6.347	6.29389	6.41775	6.31729	6.45608	6.40912	6.36146	6.32873	6.46594	6.55781	6.29775	6.40393	6.31722	6.35164	6.37404	6.38223	6.2513	6.18508	6.40901	6.41236	6.41519	6.31309	6.36455	6.41456	chr8	12614277	12672248	57972	-	HAVANA	gene	NA	NA
ENSMUSG00000000776.12	protein_coding	Polr3d	4.01036	3.98607	4.02127	4.67926	4.46698	2.98581	2.09257	4.3431	4.43976	4.81715	4.36355	4.6747	3.54196	4.07692	4.21096	4.24773	4.3071	4.48177	4.43286	3.79097	3.80733	4.36582	4.38552	4.42244	4.63329	4.45774	2.71437	2.34473	2.10359	3.93408	4.1722	3.85106	4.41722	4.49221	4.49076	chr14	70438748	70443471	4724	-	ENSEMBL	gene	NA	NA
ENSMUSG00000000782.15	protein_coding	Tcf7	8.68985	8.44995	8.41902	8.63447	8.83152	9.29936	9.81139	9.02117	9.00779	8.59565	8.45421	7.92067	9.00648	9.20937	9.18061	9.1572	8.29636	8.09748	8.02713	9.90802	9.85172	8.27988	8.51975	8.77303	8.83348	8.8102	9.46069	10.2096	10.2642	9.4168	9.48349	9.43227	8.07441	8.27354	8.10461	chr11	52252371	52283014	30644	-	HAVANA	gene	NA	NA
ENSMUSG00000000787.12	protein_coding	Ddx3x	8.57399	8.46165	8.49293	9.12161	8.6738	8.52546	7.99862	8.63073	8.84774	9.05035	8.76115	9.25617	8.45066	8.46877	8.63174	8.63183	8.94406	9.00461	9.11443	8.0698	8.30395	9.00091	8.76142	8.82511	8.92369	9.06089	8.54404	8.06469	8.08874	8.30803	8.23935	8.36476	8.96229	8.78429	9.04824	chrX	13280970	13294052	13083	+	HAVANA	gene	NA	NA
ENSMUSG00000000791.8	protein_coding	Il12rb1	4.80865	3.92253	4.10219	6.3842	6.15252	5.7127	5.30076	5.81631	6.14394	6.42437	6.57608	6.75637	6.01299	4.70524	4.75128	5.09762	6.63561	6.61218	6.62764	2.06253	3.08173	6.654	6.44588	5.89238	6.07851	6.23815	5.70132	4.73739	4.78613	4.03859	3.64796	4.18663	6.7355	6.76259	6.59936	chr8	70808449	70821424	12976	+	ENSEMBL	gene	NA	NA
ENSMUSG00000000804.14	protein_coding	Usp32	5.97129	5.71823	5.82694	5.91342	6.0797	6.47376	6.55415	6.18131	6.11359	5.93055	6.10329	5.9752	6.2161	6.18188	6.26764	6.24853	6.03061	5.7693	5.99059	6.26261	6.22721	6.04242	6.02547	6.11901	6.12534	6.07591	6.45931	6.63147	6.74294	6.33833	6.39709	6.27106	5.78394	5.92456	5.98379	chr11	84984442	85140161	155720	-	HAVANA	gene	NA	NA
ENSMUSG00000000817.10	protein_coding	Fasl	3.6494	3.83894	3.68974	2.66234	3.03589	4.02768	3.8463	3.56227	3.73092	2.26183	5.12557	5.82965	3.72368	3.02259	2.77817	3.44565	4.07246	4.51808	5.16378	2.86467	3.15494	5.04051	4.79186	1.66351	1.47404	2.73682	2.70466	2.16507	2.74576	3.18624	3.16164	3.30358	4.4775	4.16117	4.66398	chr1	161780689	161788495	7807	-	HAVANA	gene	NA	NA
ENSMUSG00000000823.16	protein_coding	Zfp512b	6.05462	6.17204	6.15329	6.23127	6.01745	5.5721	5.37878	6.23361	6.22832	6.22375	5.77512	5.76117	5.6789	6.23769	6.22771	6.21601	5.96977	6.0379	5.73777	6.12906	6.19478	5.77896	6.0771	6.24969	6.30525	6.04829	5.5976	5.70862	5.51073	5.96062	5.95613	5.95939	5.69364	5.80329	5.78994	chr2	181582103	181592803	10701	-	HAVANA	gene	NA	NA
ENSMUSG00000000826.16	protein_coding	Dnajc5	7.49265	7.57527	7.596	7.26224	7.45033	7.32179	7.26043	7.42208	7.373	7.22599	7.43069	7.42368	7.27822	7.47828	7.42715	7.43065	7.40211	7.35697	7.25118	7.7167	7.62881	7.35666	7.41634	7.33063	7.33823	7.27679	7.30398	7.41456	7.50478	7.61217	7.53791	7.5291	7.29374	7.38421	7.34975	chr2	181520485	181555133	34649	+	HAVANA	gene	NA	NA
ENSMUSG00000000827.18	protein_coding	Tpd52l2	5.24159	5.34595	5.3818	5.30088	5.37706	5.18751	4.97748	5.10577	5.19044	5.0981	4.93255	5.12995	5.07511	5.07733	5.08636	5.08405	5.03668	5.10736	5.12503	4.94814	5.02515	5.05462	5.16235	5.20144	5.3262	5.21095	5.27407	5.01763	4.91273	5.21346	5.14583	5.11054	5.10705	5.12276	5.09342	chr2	181497142	181517966	20825	+	HAVANA	gene	NA	NA
ENSMUSG00000000838.17	protein_coding	Fmr1	6.39423	6.12783	6.20605	6.729	6.40399	6.89406	6.60605	6.49785	6.64055	6.80705	6.73033	6.90644	6.72334	6.53192	6.47397	6.52978	6.96398	6.73214	6.92128	6.18184	6.22721	6.83886	6.57096	6.58701	6.54815	6.66929	6.94812	6.61695	6.50574	6.34036	6.15587	6.50973	6.68312	6.50878	6.90487	chrX	68678541	68717963	39423	+	HAVANA	gene	NA	NA
ENSMUSG00000000876.11	protein_coding	Pxmp4	3.82208	3.90619	3.89871	3.78978	3.44277	4.44161	4.45928	3.64182	3.76455	3.61068	3.37941	3.48201	3.6201	3.52399	3.55486	3.64357	3.8527	3.78659	3.54615	3.49225	3.66977	3.58817	3.35195	3.72073	3.53529	3.70739	4.41335	4.67157	4.65158	3.65941	3.5684	3.59653	3.5158	3.49814	3.55464	chr2	154585758	154603708	17951	-	HAVANA	gene	NA	NA
ENSMUSG00000000902.13	protein_coding	Smarcb1	5.91653	5.54821	5.56508	6.2587	6.35611	6.32997	6.16077	6.3922	6.43983	6.41068	6.37868	6.46089	6.36436	6.25233	6.18664	6.14409	6.47955	6.5504	6.53255	5.84129	5.80014	6.36536	6.38284	6.34711	6.264	6.16287	6.46003	5.93694	5.73462	6.12119	6.10922	6.12018	6.58379	6.46946	6.44858	chr10	75896769	75921617	24849	-	HAVANA	gene	NA	NA
ENSMUSG00000000915.15	protein_coding	Hip1r	6.16511	6.74565	6.86571	5.23864	5.00137	6.64163	7.05874	5.20906	5.60037	4.98713	5.44997	5.42148	6.42748	5.3251	5.29746	5.17519	4.85293	4.88392	5.24212	5.40742	5.49933	5.11646	4.95876	5.43574	5.3114	5.50526	6.77203	6.7035	6.98255	5.40764	5.49589	5.37409	5.03893	4.95489	5.00918	chr5	123973628	124005558	31931	+	HAVANA	gene	NA	NA
ENSMUSG00000000916.15	protein_coding	Nsun5	4.2937	4.3578	4.42898	4.53786	4.4187	3.51564	3.15863	4.18158	4.4	4.29606	4.27866	4.41512	3.72227	4.05025	4.27958	4.30632	4.55368	4.54443	4.46736	4.12082	4.2818	4.46641	4.35875	4.50291	4.50808	4.43967	3.84986	3.1925	3.05314	4.26185	4.48002	4.19392	4.45122	4.65868	4.26285	chr5	135369953	135376805	6853	+	HAVANA	gene	NA	NA
ENSMUSG00000000959.6	protein_coding	Oxa1l	5.44585	5.41181	5.52684	5.29318	5.33789	5.74068	5.84694	5.42898	5.50902	5.25603	5.52825	5.51419	5.57855	5.2841	5.27523	5.31996	5.34635	5.49548	5.46234	5.1318	5.192	5.40692	5.32708	5.29522	5.17837	5.16427	5.75845	5.90518	6.00105	5.15682	5.35363	5.31252	5.36077	5.4611	5.29355	chr14	54360841	54369673	8833	+	HAVANA	gene	NA	NA
ENSMUSG00000000976.13	protein_coding	Heatr6	5.45578	5.48441	5.49542	5.3287	5.35449	5.26703	5.62735	5.4046	5.41036	5.47278	5.50331	5.63151	5.39635	5.47763	5.35648	5.33535	5.48694	5.48	5.43989	5.40321	5.39096	5.45532	5.47292	5.41487	5.37281	5.23571	5.33512	5.48549	5.45898	5.40908	5.32192	5.32972	5.63309	5.34293	5.45772	chr11	83753696	83783754	30059	+	HAVANA	gene	NA	NA
ENSMUSG00000001016.12	protein_coding	Ilf2	6.27699	6.14675	6.05831	6.75397	6.5892	6.45283	6.20895	6.40006	6.559	6.73401	6.56392	6.65119	6.32391	6.28737	6.49385	6.34455	6.74154	6.74901	6.73748	5.97433	5.91367	6.6009	6.54125	6.62602	6.73106	6.72175	6.50873	5.88579	5.82946	6.14366	6.09821	6.08383	6.80273	6.63294	6.76146	chr3	90476126	90488379	12254	+	HAVANA	gene	NA	NA
ENSMUSG00000001017.15	protein_coding	Chtop	7.53647	7.43293	7.43926	7.5789	7.72119	7.47546	7.40507	7.78416	7.73083	7.78541	7.82566	7.83273	7.71048	7.60427	7.62089	7.61879	7.85257	7.84693	7.79212	7.41014	7.52178	7.56653	7.51138	7.63766	7.54336	7.58857	7.4704	7.41339	7.37405	7.61217	7.47295	7.69769	7.77746	7.79416	7.80195	chr3	90498956	90509498	10543	-	HAVANA	gene	NA	NA
ENSMUSG00000001018.15	protein_coding	Snapin	4.80289	5.06237	4.98313	4.53912	4.15338	4.76236	4.42263	4.54436	4.53307	4.42054	4.23716	4.3891	4.69911	4.76719	4.97949	4.7073	4.48927	4.66496	4.55942	4.90926	4.81474	4.31522	4.5115	4.53545	4.61888	4.64386	4.69248	4.62857	4.87388	4.7215	4.67893	4.65965	4.52156	4.31311	4.3498	chr3	90488026	90491033	3008	-	HAVANA	gene	NA	NA
ENSMUSG00000001020.8	protein_coding	S100a4	3.843	5.07768	5.24281	1.0537	1.36772	4.05407	4.15585	1.24018	1.675	-0.51275	5.05858	5.65139	3.24396	0.609223	0.907602	1.85492	4.20352	4.02733	4.53806	0.31413	0.853272	4.16654	4.62945	0.852802	0.976244	2.09886	3.50599	2.84483	3.83462	0.410687	1.78896	0.620691	3.5158	3.49814	3.78512	chr3	90603771	90606045	2275	+	HAVANA	gene	NA	NA
ENSMUSG00000001025.8	protein_coding	S100a6	4.32536	4.55331	4.67991	3.22641	2.60458	5.76841	5.71304	2.89188	3.34281	2.02367	6.2142	6.72909	5.22453	2.04791	2.70923	3.22328	5.73617	5.67916	5.95304	1.35975	2.64679	5.55023	5.52775	1.68338	2.30936	3.6927	5.07745	4.53304	5.33274	1.9601	2.36096	1.77699	5.42092	5.39228	5.37972	chr3	90612882	90624181	11300	+	HAVANA	gene	NA	NA
ENSMUSG00000001029.15	protein_coding	Icam2	4.87834	5.17827	5.29826	4.31383	4.65285	4.32879	4.74955	4.68734	4.56911	4.29838	4.21699	4.00921	4.54094	4.78237	4.68358	4.66968	4.03272	4.19821	4.15371	5.19694	5.17135	4.06485	4.25851	4.34035	4.27394	4.43732	4.53064	5.01763	4.94946	4.86558	5.0169	5.00962	4.37558	4.23518	3.95827	chr11	106377656	106388075	10420	-	HAVANA	gene	NA	NA
ENSMUSG00000001034.17	protein_coding	Mapk7	4.22804	4.39343	4.37546	4.11803	4.16743	4.00079	3.91774	4.24461	4.38675	3.84852	4.21437	4.27713	3.96121	4.06373	4.08447	3.87722	4.22484	4.3129	4.12258	4.15472	4.1354	4.07104	4.17264	4.14627	4.08444	3.81531	3.99045	3.73001	3.89085	3.93408	4.0506	3.96839	4.25829	4.03425	4.03356	chr11	61488812	61494406	5595	-	HAVANA	gene	NA	NA
ENSMUSG00000001052.15	protein_coding	Sec24b	5.89689	5.18318	5.25535	6.68245	6.73499	6.60388	6.44956	6.52169	6.57771	6.79158	6.4813	6.46838	6.38096	6.57855	6.61721	6.63084	6.5268	6.49438	6.54435	6.61902	6.59409	6.56533	6.57484	6.62972	6.69351	6.51363	6.55088	6.44405	6.51449	6.61155	6.57046	6.61327	6.60045	6.59844	6.60623	chr3	129982759	130061553	78795	-	HAVANA	gene	NA	NA
ENSMUSG00000001054.9	protein_coding	Rmnd5b	5.00064	5.46781	5.34315	4.56743	4.361	4.5621	4.56478	4.62345	4.70351	4.35379	4.77401	4.77274	4.48799	4.49544	4.67328	4.55918	4.59599	4.72487	4.5661	4.70254	4.60769	4.72667	4.62227	4.38653	4.46478	4.53938	4.35248	4.69215	4.74351	4.55459	4.67463	4.63037	4.66199	4.71548	4.60486	chr11	51623671	51635896	12226	-	HAVANA	gene	NA	NA
ENSMUSG00000001056.3	protein_coding	Nhp2	5.22192	4.94463	4.94543	6.16467	5.86385	5.23278	4.74955	5.35955	5.79752	6.06593	5.75004	6.18294	5.27229	5.17456	5.46799	5.35162	5.88309	6.16476	6.06043	4.08797	4.33762	5.8364	5.78838	5.83358	5.90274	6.07874	5.48301	4.41733	4.24372	4.92132	5.2084	5.07292	6.0974	6.17449	5.93663	chr11	51619735	51623714	3980	+	HAVANA	gene	NA	NA
ENSMUSG00000001062.17	protein_coding	Vps9d1	3.97047	4.35268	4.32479	3.46179	3.6894	3.38082	3.36667	3.72942	3.79742	3.50644	3.32707	3.13196	3.25553	4.00057	3.92424	3.8682	3.32376	3.22611	3.19152	4.39457	4.24005	3.42876	3.66777	3.61607	3.68487	3.48102	3.44316	3.56135	3.79097	3.85703	3.97034	4.08636	3.31016	3.33269	3.22417	chr8	123242356	123254348	11993	-	HAVANA	gene	NA	NA
ENSMUSG00000001065.14	protein_coding	Zfp276	5.06942	5.63158	5.68028	4.2377	4.49908	4.35935	4.42928	4.58268	4.50627	4.22386	4.55721	4.18966	4.19811	4.70781	4.56522	4.59377	4.31547	4.27574	4.13851	5.20839	5.00502	4.51834	4.52732	4.56544	4.51078	4.2876	4.32398	4.31234	4.49343	4.7318	4.81735	4.82932	4.57992	4.15409	4.20843	chr8	123254195	123269745	15551	+	HAVANA	gene	NA	NA
ENSMUSG00000001082.12	protein_coding	Mfsd10	4.10708	4.29829	4.43548	4.16808	3.59355	4.43302	4.30795	3.96762	3.97169	4.05265	4.32283	4.37602	4.52669	3.46505	3.58815	3.6169	4.03272	4.27944	4.26053	2.65666	2.72367	3.7081	3.81779	3.75868	3.97249	4.03311	4.50849	4.1537	4.22197	3.15796	3.06832	3.09421	3.72919	3.75115	3.79477	chr5	34633642	34637212	3571	-	HAVANA	gene	NA	NA
ENSMUSG00000001089.14	protein_coding	Luzp1	4.1248	3.57532	3.59095	5.05594	4.64224	5.08702	4.45928	4.43531	4.58802	4.88405	5.11999	5.22292	4.97276	4.34009	4.50917	4.59514	5.38646	5.29425	5.34867	3.07626	3.19406	4.89298	4.68565	4.649	4.71349	4.80601	5.2509	4.45393	4.32078	3.93408	3.78332	4.08636	5.19621	5.02182	5.32083	chr4	136469761	136554780	85020	+	HAVANA	gene	NA	NA
ENSMUSG00000001098.15	protein_coding	Kctd10	6.27263	6.24893	6.26679	6.03182	6.043	6.86371	6.64577	6.0557	6.04895	6.00017	6.35588	6.44377	6.6181	6.06901	6.07124	5.99594	6.15417	6.24031	6.23636	6.48434	6.42817	6.20438	6.24849	6.00524	6.03487	6.04674	6.77767	6.94752	6.95534	6.14034	6.3508	6.22827	6.20071	6.09741	6.17275	chr5	114363567	114380508	16942	-	HAVANA	gene	NA	NA
ENSMUSG00000001100.10	protein_coding	Poldip2	4.84807	4.82932	4.87268	5.25705	4.93512	4.88132	4.51299	4.91078	5.02267	5.18189	5.06295	5.24053	4.93009	4.61473	4.6989	4.72317	5.09766	5.16127	5.16531	4.08308	4.24751	4.96116	4.97023	4.98545	5.06529	5.06369	4.92066	4.45694	4.33098	4.53274	4.55589	4.32106	5.06702	5.10707	4.97957	chr11	78512193	78522736	10544	+	HAVANA	gene	NA	NA
ENSMUSG00000001105.15	protein_coding	Ift20	4.11882	4.47953	4.55865	3.57087	3.9695	3.70018	3.79302	3.86821	3.67542	3.67162	3.7229	3.90267	3.53248	3.81896	3.49176	3.66975	3.69868	3.6623	3.71428	3.62599	3.60157	3.78535	3.68165	3.73031	3.39641	3.63239	3.89123	3.73993	3.55037	3.6185	3.87435	3.82867	3.99054	3.85808	3.72582	chr11	78536361	78541737	5377	+	HAVANA	gene	NA	NA
ENSMUSG00000001123.15	protein_coding	Lgals9	6.32055	6.36066	6.46092	6.08185	6.08363	6.63481	6.7232	6.23218	6.29083	6.35888	6.25361	6.34293	6.54136	6.0184	6.19657	6.0723	6.42533	6.45746	6.47085	5.55038	5.45839	6.18181	6.12789	6.22109	6.14303	6.06074	6.70247	6.7149	6.72114	5.8611	5.84798	5.89349	6.27962	6.21163	6.20979	chr11	78962974	78984946	21973	-	HAVANA	gene	NA	NA
ENSMUSG00000001127.12	protein_coding	Araf	6.53734	6.61405	6.63658	6.31924	6.46395	6.21521	6.17958	6.65922	6.47225	6.39756	6.44381	6.19428	6.19972	6.63535	6.63249	6.57237	6.28098	6.34471	6.26102	7.0229	7.01316	6.42813	6.46474	6.5159	6.50034	6.47265	6.29435	6.30488	6.40211	6.66652	6.71448	6.59015	6.25496	6.21894	6.24366	chrX	20797814	20860519	62706	+	HAVANA	gene	NA	NA
ENSMUSG00000001138.13	protein_coding	Cnnm3	4.71372	4.42489	4.37163	5.09299	5.23956	4.70695	4.88303	5.17129	5.06378	5.08526	4.87854	4.58338	4.77596	5.39759	5.34029	5.11678	4.9667	4.75155	4.75253	5.6496	5.32729	4.78238	4.81724	5.19374	5.29489	4.97743	5.0718	4.79083	4.87708	5.25743	5.21277	5.30154	4.92991	4.84403	4.79956	chr1	36511867	36528237	16371	+	HAVANA	gene	NA	NA
ENSMUSG00000001143.13	protein_coding	Lman2l	3.98412	3.78774	3.52342	4.18248	4.54878	4.01622	3.93752	4.33781	4.29076	4.55879	4.36355	3.94624	4.48553	4.49544	4.38522	4.29223	4.11875	3.8063	4.11311	4.67681	4.53031	4.51083	3.95367	4.5388	4.4845	4.49773	4.21221	4.17578	4.17368	4.59734	4.73661	4.57762	4.19587	4.09116	4.17328	chr1	36419871	36445271	25401	-	HAVANA	gene	NA	NA
ENSMUSG00000001150.6	protein_coding	Mcm3ap	6.63604	6.38857	6.35371	6.75649	6.81391	6.93329	7.01261	6.88491	6.91934	6.78623	6.90667	7.0049	6.92811	6.84058	6.79108	6.80626	6.92167	6.98727	6.89874	7.01898	6.90706	6.89091	6.93689	6.76403	6.82117	6.83667	7.01386	6.99034	6.93177	6.89463	7.00249	6.82737	6.98077	6.89748	6.92341	chr10	76468971	76515856	46886	+	ENSEMBL	gene	NA	NA
ENSMUSG00000001151.9	protein_coding	Pcnt	7.16057	6.91147	6.9196	7.1923	7.01013	7.86834	7.80491	7.27503	7.32055	7.09397	7.40831	7.52653	7.67385	7.27276	7.24432	7.30987	7.63735	7.58299	7.59746	7.35264	7.28081	7.38121	7.48899	7.17979	7.1098	7.30551	7.9132	7.75378	7.66499	7.19155	7.14965	7.15	7.3986	7.47999	7.3603	chr10	76351254	76442912	91659	-	ENSEMBL	gene	NA	NA
ENSMUSG00000001156.9	protein_coding	Mxd1	5.41912	5.16849	5.37128	5.35309	6.19306	5.34238	6.59052	6.52926	6.6953	6.35817	5.44423	5.68178	6.2057	5.22675	5.3725	5.28712	5.2987	5.42623	5.08199	5.00869	4.74574	4.98592	4.80672	5.7034	5.47988	5.43423	5.37085	6.04285	6.01316	5.46497	5.2084	5.49529	5.44461	5.54559	5.35058	chr6	86647042	86669161	22120	-	HAVANA	gene	NA	NA
ENSMUSG00000001157.13	protein_coding	Gmcl1	4.91837	4.78023	4.83557	4.77926	4.99053	5.08565	5.1521	5.07932	5.03788	4.86209	5.18292	5.16264	4.77021	4.9801	4.98629	5.03656	5.19089	4.97581	4.95724	5.28685	5.23087	4.99007	5.04238	4.93662	4.8342	4.93095	5.00218	4.92811	4.92499	5.23053	5.04656	5.28107	4.97708	4.86282	5.18799	chr6	86691768	86733383	41616	-	HAVANA	gene	NA	NA
ENSMUSG00000001158.13	protein_coding	Snrnp27	4.25597	4.03625	4.04795	4.78116	4.53737	4.73519	4.39636	4.35102	4.53054	4.57115	4.50732	4.87584	4.61016	4.1985	4.19304	4.36133	4.71628	4.7434	4.95519	3.6723	3.80227	4.74612	4.50745	4.29909	4.36544	4.73848	4.60819	4.30161	4.35116	4.03859	4.11735	4.1778	4.7784	4.76628	4.70037	chr6	86675151	86684522	9372	-	HAVANA	gene	NA	NA
ENSMUSG00000001166.17	protein_coding	Oas1c	3.49321	4.14296	3.99638	2.39883	2.78687	3.20946	3.82267	3.09763	2.93364	2.67248	2.83349	2.69408	3.2642	2.71706	2.99986	3.21342	2.57146	2.36126	2.90206	3.2865	3.4797	2.64921	2.58954	2.63206	2.50115	2.53044	3.30677	3.85296	3.96168	3.15796	2.793	2.78087	2.21319	2.36686	2.7558	chr5	120800194	120812514	12321	-	HAVANA	gene	NA	NA
ENSMUSG00000001173.15	protein_coding	Ocrl	3.68547	3.66957	3.81364	4.08163	3.95243	3.38676	3.39556	3.57133	3.65763	3.81982	3.04428	3.1569	3.2323	3.82938	3.8935	4.1282	2.96687	3.2835	3.50329	4.20958	4.14342	3.60957	3.36921	4.11017	4.08012	4.1843	3.28277	3.46899	3.28263	4.13603	4.09859	3.83991	3.29535	3.08304	3.0417	chrX	47912387	47965868	53482	+	HAVANA	gene	NA	NA
ENSMUSG00000001175.13	protein_coding	Calm1	8.78202	8.81979	8.75444	8.7755	8.61805	9.17506	8.75707	8.50797	8.67335	8.67322	9.15534	9.48945	8.86012	8.35883	8.53706	8.5367	9.23781	9.24249	9.30966	7.90553	8.12446	9.18955	9.06398	8.55477	8.63428	8.68371	9.17431	8.44062	8.4003	8.31837	8.43006	8.36322	9.26559	9.15939	9.24585	chr12	100199435	100209806	10372	+	HAVANA	gene	NA	NA
ENSMUSG00000001211.14	protein_coding	Agpat3	6.96378	6.66243	6.68065	7.54365	7.3874	6.92157	6.75838	7.334	7.49373	7.72588	7.38836	7.47291	7.10841	7.19715	7.18436	7.09033	7.72653	7.75838	7.57156	6.49752	6.45768	7.43726	7.32826	7.51829	7.53472	7.44731	7.03919	6.72741	6.69111	6.85775	6.92076	6.93361	7.74513	7.76822	7.62596	chr10	78269178	78352489	83312	-	HAVANA	gene	NA	NA
ENSMUSG00000001228.14	protein_coding	Uhrf1	6.71085	5.32479	5.58807	8.68875	7.8385	8.79433	8.21562	7.96108	8.19231	8.43809	8.47866	8.91934	8.5367	7.53148	7.67123	7.7346	8.76203	8.95501	8.83161	4.47887	5.57555	8.43596	8.42178	8.22291	8.3515	8.44818	8.93205	8.07328	7.55022	6.35241	6.25396	6.31601	8.67358	8.6484	8.60484	chr17	56303321	56323486	20166	+	HAVANA	gene	NA	NA
ENSMUSG00000001229.7	protein_coding	Dpp9	5.55169	5.07246	5.07253	6.07646	5.73	6.31446	6.02177	5.99273	6.13818	6.1752	6.38043	6.51614	6.14324	5.75965	5.78154	5.82217	6.36339	6.39048	6.43011	5.38941	5.56072	6.18395	6.20682	5.8213	5.97308	5.93009	6.37077	5.91304	5.79111	5.62588	5.71575	5.55107	6.44139	6.29185	6.18616	chr17	56186682	56218889	32208	-	ENSEMBL	gene	NA	NA
ENSMUSG00000001248.14	protein_coding	Gramd1a	8.18328	8.78159	8.93614	6.98484	7.3049	7.54125	7.98086	7.55302	7.33438	6.86962	7.31649	6.85426	7.37696	7.99416	7.60932	7.70094	6.81207	6.78339	6.68924	8.83058	8.6598	7.12842	7.44594	7.47704	7.33911	7.25475	7.43012	8.14103	8.37119	8.22895	8.38917	8.20097	6.85141	7.0132	6.77904	chr7	31130127	31155896	25770	-	HAVANA	gene	NA	NA
ENSMUSG00000001280.12	protein_coding	Sp1	7.8644	7.57552	7.60582	8.04496	8.03782	8.18302	8.10247	8.18381	8.12061	8.14	8.12518	8.18441	8.24516	8.11411	8.08704	8.14337	8.22232	8.18855	8.1348	8.19375	8.21045	8.13577	8.11861	8.00587	8.00971	8.08571	8.16905	8.10529	8.10715	8.1995	8.21995	8.20386	8.12868	8.13446	8.13484	chr15	102406143	102436404	30262	+	HAVANA	gene	NA	NA
ENSMUSG00000001281.9	protein_coding	Itgb7	8.20672	8.74672	8.66349	7.24897	7.61127	8.16064	8.38815	7.89137	7.83898	7.15224	7.78766	7.2962	7.94356	7.95602	7.88364	7.76014	7.70898	7.38641	7.17925	7.89569	7.86076	7.2099	7.21946	7.6735	7.59267	7.43633	8.25158	8.21997	8.37159	7.71643	7.85674	7.8918	7.33506	7.63445	7.3074	chr15	102215995	102231935	15941	-	HAVANA	gene	NA	NA
ENSMUSG00000001285.12	protein_coding	Myg1	4.84884	4.6039	4.65909	5.26099	5.15582	5.17295	5.17723	5.03044	5.19426	5.27857	5.12036	5.29033	5.10639	4.87776	4.87531	5.11993	5.17146	5.23786	5.22782	4.41172	4.37728	5.12207	5.11503	5.21378	5.18574	5.27764	5.30326	4.81574	4.72117	4.70713	4.8286	4.82497	5.25759	5.31166	5.34733	chr15	102331709	102338139	6431	+	HAVANA	gene	NA	NA
ENSMUSG00000001288.14	protein_coding	Rarg	4.55434	4.8708	4.87674	3.77085	4.42428	3.72854	4.26163	4.57923	4.44185	3.64381	4.31552	3.50646	4.69544	4.6475	4.51783	4.54793	3.97517	3.80238	3.37707	4.87083	4.80254	3.80032	3.89132	4.29587	4.24339	4.2223	3.99444	4.4479	4.1699	5.05382	5.07082	5.07292	3.56602	4.16875	3.61035	chr15	102234938	102257517	22580	-	HAVANA	gene	NA	NA
ENSMUSG00000001289.12	protein_coding	Pfdn5	6.35658	6.82675	6.70304	5.90396	6.01359	5.79378	5.93098	6.14769	6.08053	5.94101	6.02983	5.81331	5.93338	5.98644	6.11432	6.11421	5.79874	5.85092	5.69944	5.99313	6.05779	5.74048	5.86357	5.94203	5.92512	6.07762	5.76578	6.19604	6.11571	5.97555	6.06241	5.96408	5.86207	5.87041	5.78023	chr15	102326116	102331873	5758	+	HAVANA	gene	NA	NA
ENSMUSG00000001305.5	protein_coding	Rrp15	4.65011	4.66708	4.59364	5.30784	5.18213	3.96547	3.02228	4.68526	4.95436	5.32447	4.79868	5.13937	4.15587	4.85049	5.08636	4.78436	5.06651	5.33825	5.19254	3.66577	3.94671	4.87011	5.05623	5.12276	5.27426	5.33523	4.09819	3.29834	2.69403	4.7329	4.60988	4.6687	5.22775	5.00922	4.97108	chr1	186720978	186749358	28381	-	HAVANA	gene	NA	NA
ENSMUSG00000001323.17	protein_coding	Srr	3.8204	3.83634	3.84529	3.80094	3.94692	3.5774	3.66694	3.90969	3.68929	3.83342	3.5007	3.54216	3.34823	4.07762	4.01174	3.79735	3.73132	3.70367	3.69452	3.97206	3.7682	3.77395	3.93138	4.02366	3.80798	3.91454	3.73241	3.6042	3.63834	4.19754	3.91705	3.99699	3.73469	3.77348	3.9811	chr11	74906359	74925948	19590	-	HAVANA	gene	NA	NA
ENSMUSG00000001348.14	protein_coding	Acp5	6.15446	6.53088	6.4979	5.24613	5.46094	6.26932	6.10939	5.624	5.35954	5.19313	5.649	5.0705	6.04417	6.01726	5.82757	5.80219	5.68709	5.43765	5.35404	6.89066	6.84576	5.58306	5.60263	5.56165	5.43834	5.55286	6.02663	6.31404	6.50626	6.14479	6.25186	6.1789	5.37588	5.58857	5.41143	chr9	22126731	22135746	9016	-	ENSEMBL	gene	NA	NA
ENSMUSG00000001366.14	protein_coding	Fbxo9	4.77258	5.11977	5.15294	4.19673	4.26746	4.31014	4.33803	4.24461	4.41879	4.22207	4.60846	4.67038	4.15895	4.54371	4.35974	4.38996	4.36905	4.32934	4.40983	4.86799	4.78983	4.42496	4.52296	4.34347	4.0758	4.32749	4.30508	4.20828	4.48198	4.63885	4.44146	4.75437	4.37558	4.3328	4.35385	chr9	78081499	78109065	27567	-	HAVANA	gene	NA	NA
ENSMUSG00000001376.17	protein_coding	Vps50	4.91585	5.08909	5.01838	5.00015	4.96096	4.62129	4.76069	4.75252	4.74622	5.05918	4.58637	4.76059	4.51711	4.99175	5.09603	4.91267	4.7656	4.75966	4.74642	4.53365	4.52111	4.80667	4.68105	4.98545	5.04551	5.0094	4.58456	4.4479	4.48198	4.77074	4.66829	4.86305	4.82038	4.7411	4.89686	chr6	3498382	3603531	105150	+	HAVANA	gene	NA	NA
ENSMUSG00000001380.6	protein_coding	Hars	5.87767	5.75959	5.81802	6.49728	5.97792	6.02102	5.47473	5.71914	6.02499	6.25429	6.22116	6.65132	5.96006	5.61292	5.76687	5.79469	6.404	6.51998	6.53972	4.81658	5.05291	6.33206	6.21999	6.19753	5.97969	6.3398	6.21783	5.43696	5.25454	5.41208	5.41961	5.51295	6.50331	6.33102	6.46197	chr18	36766530	36783205	16676	-	ENSEMBL	gene	NA	NA
ENSMUSG00000001383.8	protein_coding	Zmat2	5.46153	5.24287	5.23755	5.88641	5.6581	5.95804	5.79663	5.54228	5.59181	5.68207	5.46749	5.77935	5.65077	5.50715	5.72903	5.84533	5.65735	5.84939	5.82931	5.17643	5.22522	5.67017	5.73279	5.71913	5.72483	5.8573	5.92787	5.68186	5.70879	5.51877	5.52522	5.60148	5.85888	5.74114	5.75081	chr18	36793923	36799660	5738	+	ENSEMBL	gene	NA	NA
ENSMUSG00000001403.13	protein_coding	Ube2c	4.20079	3.14533	3.6171	4.94379	3.31502	6.94241	6.59519	4.92852	5.40504	4.88008	6.68406	6.92644	6.73353	3.08482	2.90688	3.61151	6.8191	6.83917	6.8549	1.35975	1.71178	6.40934	6.29601	4.14283	3.67918	4.83752	6.94492	6.6754	6.6222	1.71043	1.15223	1.72943	6.66246	6.59282	6.65472	chr2	164769898	164778822	8925	+	HAVANA	gene	NA	NA
ENSMUSG00000001415.10	protein_coding	Smg5	6.74093	6.84029	6.85077	6.74683	6.71741	6.24743	6.14597	6.71496	6.80765	6.65198	6.60134	6.81581	6.33263	6.69356	6.63059	6.56541	6.80324	6.88808	6.73857	6.67369	6.693	6.78109	6.89785	6.78319	6.92286	6.71728	6.33346	6.0043	5.95501	6.61285	6.74042	6.55988	6.93381	6.90657	6.74585	chr3	88336260	88362338	26079	+	HAVANA	gene	NA	NA
ENSMUSG00000001416.13	protein_coding	Cct3	7.62207	7.54814	7.48877	8.2973	8.089	7.46531	6.8655	7.74066	7.96747	8.28094	7.93004	8.26546	7.40212	7.60009	7.75946	7.65725	8.06055	8.19342	8.15321	6.60374	6.85066	8.02286	7.87983	8.07519	8.14109	8.17453	7.64871	6.6348	6.40774	7.43424	7.47749	7.4886	8.26271	8.22306	8.1691	chr3	88297116	88321767	24652	+	HAVANA	gene	NA	NA
ENSMUSG00000001418.13	protein_coding	Glmp	5.51275	5.49677	5.52248	5.12802	5.32	5.72791	6.14914	5.55322	5.43275	5.04293	5.56309	5.60747	5.66487	5.54083	5.37257	5.62744	5.48442	5.40016	5.53035	5.55792	5.47609	5.43862	5.47019	5.25133	4.98228	5.24581	5.74481	6.09142	6.12197	5.50059	5.4961	5.54864	5.62363	5.48914	5.32463	chr3	88325023	88331313	6291	+	HAVANA	gene	NA	NA
ENSMUSG00000001419.17	protein_coding	Mef2d	6.97585	6.54723	6.71082	6.98321	7.09569	7.59285	7.68852	7.32416	7.25021	7.00695	7.18454	7.10454	7.34096	7.42243	7.40951	7.36718	7.15008	7.10565	7.13725	7.76855	7.73484	7.21603	7.3661	7.10403	7.17184	6.9966	7.50554	7.72127	7.88613	7.46343	7.4977	7.41583	7.11767	7.18343	7.01292	chr3	88142372	88172086	29715	+	HAVANA	gene	NA	NA
ENSMUSG00000001424.14	protein_coding	Snd1	7.41466	7.10238	7.01773	7.99547	7.98999	8.02593	7.77091	7.73311	7.78449	7.90543	7.52532	7.86737	7.66051	7.76833	7.87412	7.76318	7.86734	7.97851	7.98296	6.95027	7.06421	7.80434	7.7742	7.80741	8.04639	7.85145	8.20543	7.70163	7.58329	7.6004	7.56379	7.57523	7.87718	7.89692	7.82155	chr6	28475139	28935162	460024	+	HAVANA	gene	NA	NA
ENSMUSG00000001436.15	protein_coding	Slc19a1	4.49504	3.97493	3.974	5.8499	5.5516	4.09095	3.38119	5.19932	5.46968	5.53466	4.85521	5.16264	4.19844	5.44072	5.48576	5.32715	5.28524	5.55997	5.38978	4.39851	4.39247	5.05306	5.05267	5.78268	5.75762	5.54198	4.13841	3.17222	2.8152	5.31298	5.2892	5.45564	5.59731	5.57153	5.38612	chr10	77032241	77061002	28762	+	HAVANA	gene	NA	NA
ENSMUSG00000001440.5	protein_coding	Kpnb1	8.7206	8.22151	8.26228	9.76668	9.31849	9.32968	8.90098	9.17738	9.42461	9.61419	9.41921	9.76843	9.18826	8.84822	8.91076	9.01037	9.60339	9.68731	9.63758	8.01053	8.24066	9.45549	9.38595	9.36954	9.40945	9.52354	9.38416	8.65572	8.5849	8.63156	8.58043	8.63097	9.64249	9.62915	9.63756	chr11	97159714	97187881	28168	-	HAVANA	gene	NA	NA
ENSMUSG00000001441.13	protein_coding	Npepps	5.59504	4.90877	4.95827	6.31598	6.34634	6.73957	6.28562	6.12321	6.23972	6.50451	6.32207	6.09132	6.22348	6.22693	6.25733	6.0947	6.27843	6.05781	6.21084	6.18146	6.08563	6.05573	5.92108	6.41701	6.45023	6.25408	6.63635	6.27195	6.35376	6.14118	6.35227	6.20739	6.17631	6.17072	6.21699	chr11	97205842	97280638	74797	-	HAVANA	gene	NA	NA
ENSMUSG00000001444.2	protein_coding	Tbx21	4.68108	4.48583	4.58041	6.46002	6.46545	5.14605	5.25025	5.34905	5.63972	5.88673	5.01262	4.97557	4.98497	4.11576	4.22161	4.6954	4.45275	4.72901	5.08683	2.02224	2.94163	5.08855	4.85039	6.08113	5.99158	6.06929	5.08121	4.31161	4.6242	3.81238	2.83893	3.85106	4.98633	4.75123	4.75577	chr11	97098071	97115331	17261	-	HAVANA	gene	NA	NA
ENSMUSG00000001445.10	protein_coding	Mrpl10	5.06523	5.09634	4.93509	5.35008	4.89471	5.39704	5.20915	5.01522	5.1278	5.01685	5.11663	5.31095	5.19994	4.95509	4.92525	5.11279	5.36669	5.44265	5.36158	4.53998	4.49126	4.99466	5.25446	5.14499	5.1796	5.1851	5.44781	5.22546	5.17069	4.78407	4.82376	4.74172	5.42024	5.31504	5.15023	chr11	97041560	97049213	7654	+	HAVANA	gene	NA	NA
ENSMUSG00000001467.5	protein_coding	Cyp51	6.04162	5.32694	4.98057	6.80238	6.80164	7.7569	7.35311	6.39991	6.59298	6.93534	7.12388	7.86893	7.59136	6.3777	6.41211	6.5725	7.26137	7.94065	7.92074	5.38662	5.55208	6.89601	6.9031	6.53848	6.63442	6.76724	7.85853	7.65689	7.3551	6.18388	6.09746	6.27341	7.2954	7.22986	7.40384	chr5	4081145	4104746	23602	-	HAVANA	gene	NA	NA
ENSMUSG00000001472.16	protein_coding	Tcf25	7.63939	7.787	7.79703	7.36742	7.46168	7.50616	7.44879	7.52825	7.55267	7.32744	7.29979	7.29269	7.36789	7.60806	7.65566	7.59747	7.2199	7.28504	7.2378	8.04896	7.96848	7.35887	7.5075	7.41252	7.48784	7.34884	7.49913	7.68441	7.71986	7.71764	7.78962	7.66725	7.22605	7.24785	7.13484	chr8	123373824	123404173	30350	+	ENSEMBL	gene	NA	NA
ENSMUSG00000001482.14	protein_coding	Def8	4.06197	3.9637	4.11142	4.48852	4.2812	4.15854	4.01403	4.10185	4.24622	4.33072	3.95696	4.28564	4.01324	3.982	4.16021	4.04663	4.17825	4.19821	4.16292	3.27797	3.6918	4.01761	4.06024	4.41948	4.22787	4.34638	4.16697	4.09311	3.65689	3.7569	3.92846	3.85106	4.31813	4.31243	4.03356	chr8	123442986	123463270	20285	+	HAVANA	gene	NA	NA
ENSMUSG00000001517.14	protein_coding	Foxm1	4.65374	3.17271	3.45931	5.93815	4.82687	7.40321	7.34614	5.94807	6.12655	5.79698	7.11779	7.20832	7.23418	4.78237	4.72904	5.16346	7.31239	7.21696	7.21359	3.25207	3.80227	6.80769	6.80839	5.38178	5.14182	5.66373	7.50647	7.2126	7.0811	3.53301	3.37931	3.74742	7.07055	7.00079	6.97427	chr6	128362967	128376146	13180	+	HAVANA	gene	NA	NA
ENSMUSG00000001518.12	protein_coding	Itfg2	4.37525	4.28932	4.1297	4.66498	4.67383	4.47827	4.11301	4.64935	4.67018	4.89785	4.37062	4.48588	4.58745	4.60869	4.93069	4.48444	4.54605	4.74135	4.44045	4.48259	4.39247	4.49562	4.68565	4.71565	4.83114	4.54484	4.60036	4.2505	3.88624	4.47661	4.41138	4.59763	4.60908	4.48616	4.50258	chr6	128409444	128424931	15488	-	HAVANA	gene	NA	NA
ENSMUSG00000001524.14	protein_coding	Gtf2h4	3.62028	3.49335	3.35106	4.16228	3.96099	4.05033	3.68015	3.87188	4.01983	4.25001	4.16372	4.25709	3.75662	3.37541	3.67335	3.59521	4.11114	4.27095	4.20811	2.74597	2.72367	3.82614	3.74473	4.08051	4.19632	4.2017	4.06443	3.36392	3.26147	3.67944	3.16164	3.27073	4.15544	4.27081	4.03356	chr17	35667730	35673739	6010	-	HAVANA	gene	NA	NA
ENSMUSG00000001525.10	protein_coding	Tubb5	10.0951	9.63342	9.6074	10.7998	10.2482	11.1749	11.1621	10.6699	10.8556	10.7501	10.9597	11.1811	10.9521	9.96022	10.0842	10.1797	10.9676	11.0441	10.948	9.33748	9.46686	10.6728	10.6799	10.4059	10.447	10.6067	11.1695	11.0237	10.9222	9.58386	9.62437	9.63826	10.9487	10.9554	10.8154	chr17	35833921	35838306	4386	-	HAVANA	gene	NA	NA
ENSMUSG00000001569.10	protein_coding	Nom1	5.82103	5.6556	5.63713	6.26006	6.14878	5.74546	5.68113	5.98935	6.05907	6.16708	5.95441	6.24458	5.7935	5.93881	6.00854	5.99261	6.14966	6.26646	6.21822	5.64463	5.67851	6.02898	6.08501	6.09139	6.11483	6.13144	5.82184	5.64936	5.39885	5.96471	6.09982	5.95423	6.26639	6.0992	6.21519	chr5	29434664	29457843	23180	+	HAVANA	gene	NA	NA
ENSMUSG00000001576.14	protein_coding	Ergic1	5.20905	4.82188	4.85905	5.8526	5.38662	5.49053	4.78818	5.14725	5.51682	5.68435	6.37458	6.78515	5.6029	5.24048	5.34679	5.10914	6.58429	6.65357	6.63538	4.22741	4.37895	6.5231	6.40741	5.72033	5.6511	5.61002	5.63514	4.09311	3.96256	4.94633	4.88081	4.86305	6.51993	6.3463	6.52013	chr17	26561489	26656931	95443	+	HAVANA	gene	NA	NA
ENSMUSG00000001588.12	protein_coding	Acap1	7.80399	8.22363	8.22624	6.98474	7.05392	7.62316	7.77504	7.52592	7.43515	6.97759	7.68625	7.5874	7.25536	7.41697	7.27872	7.31722	7.53855	7.4903	7.49827	7.17939	7.19146	7.5002	7.35341	7.01842	7.06938	7.10158	7.56466	7.7839	7.92954	7.23464	7.19137	7.16015	7.51202	7.57727	7.44552	chr11	69881567	69895539	13973	-	HAVANA	gene	NA	NA
ENSMUSG00000001627.11	protein_coding	Ifrd1	5.25633	5.189	5.12904	5.63226	5.43269	5.24151	5.00544	5.02424	5.21423	5.18492	5.37452	5.95658	5.21974	5.09888	5.21878	5.06745	5.75185	5.95125	5.90496	5.04635	4.95511	5.69912	5.6503	5.35116	5.33258	5.36398	5.26324	4.93004	4.39193	5.30932	5.10172	5.20338	5.84806	5.82257	5.76806	chr12	40201567	40248504	46938	-	HAVANA	gene	NA	NA
ENSMUSG00000001630.13	protein_coding	Stk38l	3.78856	3.53883	3.63205	4.30833	3.94243	4.07951	3.82437	4.05518	4.13404	4.26743	3.61952	3.77436	4.01973	4.12285	4.19315	3.9872	3.86461	3.99547	3.92372	3.84395	4.04589	3.6218	3.4436	4.33618	4.39437	4.35624	4.32955	4.1407	4.03632	4.06677	3.88545	3.7828	3.56602	3.91322	3.85901	chr6	146724995	146778812	53818	+	HAVANA	gene	NA	NA
ENSMUSG00000001632.16	protein_coding	Brpf1	6.34642	6.26993	6.34721	6.31906	6.24301	6.31735	6.13102	6.34668	6.42619	6.29326	6.45271	6.58657	6.19737	6.30313	6.23468	6.34021	6.57224	6.61994	6.57546	6.47437	6.39105	6.48131	6.61153	6.36255	6.39624	6.40615	6.50617	6.18725	6.21198	6.22364	6.25398	6.26265	6.51508	6.51471	6.53889	chr6	113307137	113324860	17724	+	HAVANA	gene	NA	NA
ENSMUSG00000001642.18	protein_coding	Akr1b3	6.71695	6.81456	6.75562	6.54667	6.30816	6.86132	6.55063	6.51983	6.50931	6.45187	6.89082	7.15051	6.64224	6.39865	6.56379	6.45072	6.91916	7.07096	6.9991	6.23949	6.43415	6.89123	6.91532	6.52494	6.57988	6.5513	6.95358	6.6012	6.46623	6.33855	6.43671	6.40518	6.9958	6.86034	6.73427	chr6	34302434	34317478	15045	-	HAVANA	gene	NA	NA
ENSMUSG00000001666.8	protein_coding	Ddt	3.62588	3.47764	3.4742	3.9019	3.8269	4.24944	4.4729	3.66317	3.87646	3.80734	3.87316	4.0397	3.96825	3.55573	3.66297	3.58973	3.63108	3.92285	3.94534	2.68275	2.82684	3.71206	3.67241	3.78651	3.86121	4.11253	4.43993	4.38295	4.41006	3.25459	3.19734	3.13129	3.9247	3.86741	3.57718	chr10	75771230	75773414	2185	-	HAVANA	gene	NA	NA
ENSMUSG00000001674.11	protein_coding	Ddx18	6.32726	6.10591	6.21894	7.03111	6.85483	5.91169	5.33918	6.53834	6.75916	6.98929	6.64952	6.93997	6.05169	6.41905	6.61488	6.47155	6.78612	6.95613	6.85058	5.80124	6.18331	6.71438	6.6541	6.77765	6.87139	6.93868	6.07424	5.41701	5.11741	6.39544	6.42776	6.36643	6.9118	7.00525	6.92764	chr1	121553835	121567989	14155	-	HAVANA	gene	NA	NA
ENSMUSG00000001687.15	protein_coding	Ubl3	6.47487	6.50245	6.47611	6.06252	6.51281	6.28293	6.43398	6.73525	6.48239	6.60768	6.58927	6.62459	6.50548	6.26678	6.65108	6.60801	6.50518	6.43864	6.41027	6.31879	6.69641	6.82977	6.69891	6.21939	6.24678	6.31131	6.10068	5.99915	6.15191	6.65772	6.42371	6.67577	6.58074	6.46023	6.64675	chr5	148504635	148552789	48155	-	HAVANA	gene	NA	NA
ENSMUSG00000001700.9	protein_coding	Gramd3	7.11217	6.63933	6.77222	6.9603	7.0358	8.47264	8.99836	7.45305	7.36699	6.73175	7.97673	7.9243	8.2714	6.88185	7.13781	7.25934	7.08941	7.39717	7.66528	7.3473	7.55221	7.22697	7.54247	6.73045	6.97434	7.05735	8.34125	9.14535	9.21948	7.18996	7.11176	7.27124	7.10069	7.05392	7.10703	chr18	56432132	56503792	71661	+	ENSEMBL	gene	NA	NA
ENSMUSG00000001707.7	protein_coding	Eef1e1	4.48306	4.17126	4.42441	5.70185	4.98215	4.19288	3.38119	4.65788	4.79097	5.40122	4.95107	5.38735	4.27717	4.53099	4.38522	4.5924	5.23007	5.30538	5.34598	3.58508	3.73489	5.24716	4.89079	5.1282	5.15624	5.43276	4.10927	3.4205	3.21083	4.16473	4.19003	4.42176	5.21207	4.96205	5.40514	chr13	38645698	38659028	13331	-	ENSEMBL	gene	NA	NA
ENSMUSG00000001729.14	protein_coding	Akt1	6.76523	6.477	6.50097	7.27136	6.80324	7.23794	6.78318	6.81846	7.05603	7.13278	7.49221	7.86595	7.10321	6.73504	6.73274	6.75587	7.54138	7.6182	7.59557	6.18944	6.31944	7.42554	7.4603	7.00269	7.04191	7.10019	7.29107	6.65197	6.62566	6.33675	6.46457	6.39628	7.52318	7.54925	7.40593	chr12	112653821	112674884	21064	-	HAVANA	gene	NA	NA
ENSMUSG00000001741.12	protein_coding	Il16	8.22779	8.64554	8.59221	7.67832	7.82996	7.92497	8.21838	7.821	7.81281	7.70924	7.68894	7.46892	7.66126	7.96223	7.87669	7.963	7.29822	7.37307	7.3878	8.387	8.39505	7.54336	7.79325	7.92342	8.01868	7.87911	7.92085	8.49069	8.49737	8.15081	8.17254	8.02805	7.24424	7.37093	7.28405	chr7	83642825	83745726	102902	-	HAVANA	gene	NA	NA
ENSMUSG00000001750.15	protein_coding	Tcirg1	5.6001	6.2115	6.22731	4.69742	4.58246	5.34544	5.39318	4.73487	4.89486	4.76647	5.25218	5.11571	5.05781	4.77969	4.80889	4.67227	5.20705	5.01308	5.1391	4.71207	4.68387	5.2154	5.04732	4.89463	4.94942	4.75743	5.55771	5.32316	5.59775	4.80761	4.71829	4.65603	5.04947	5.07115	4.88336	chr19	3896050	3907133	11084	-	HAVANA	gene	NA	NA
ENSMUSG00000001751.9	protein_coding	Naglu	3.48608	3.93638	3.81364	3.06795	3.16006	2.88019	3.21287	3.35756	3.53826	3.22297	3.2525	3.33133	3.49394	3.37541	3.29074	3.27195	2.98365	2.98451	3.03981	3.37715	3.03939	2.67429	2.56298	3.247	3.11357	2.86465	2.99486	2.7694	2.8152	2.89221	3.00929	3.07531	2.73924	3.46161	3.00891	chr11	101070012	101077672	7661	+	HAVANA	gene	NA	NA
ENSMUSG00000001755.12	protein_coding	Coasy	4.14052	4.29291	4.2049	4.11203	3.73004	4.2721	4.06886	4.17796	4.24859	4.30135	4.27088	4.35462	4.10242	4.05488	4.11904	3.83619	4.07246	4.093	4.23456	3.54298	3.5781	4.04614	3.98759	3.99166	4.03625	4.0214	4.40438	3.97635	3.66766	3.72834	3.66081	4.05776	4.20382	4.05074	4.02538	chr11	101082565	101086619	4055	+	HAVANA	gene	NA	NA
ENSMUSG00000001767.5	protein_coding	Crnkl1	5.66153	5.63926	5.59334	5.78722	5.7622	5.74314	5.70152	5.61636	5.69135	5.8241	5.73368	5.82868	5.89868	5.57686	5.6784	5.60328	5.75949	5.86545	5.8138	5.38941	5.33431	5.58954	5.70587	5.66019	5.58259	5.72398	5.87691	5.7908	5.85374	5.62845	5.75521	5.58821	5.72989	5.85114	5.67185	chr2	145917479	145935014	17536	-	HAVANA	gene	NA	NA
ENSMUSG00000001774.7	protein_coding	Chordc1	6.36833	6.10462	6.1387	7.01803	6.8627	6.57227	6.28562	6.26186	6.52668	6.98222	6.74608	6.76248	6.19522	6.35871	6.56033	6.57722	6.88028	6.69223	6.96693	5.94866	6.01965	6.9113	6.39202	6.76466	6.68288	6.9164	6.51661	6.20463	6.4005	6.5476	6.49178	6.65841	6.97969	6.84998	7.14619	chr9	18292267	18314000	21734	+	ENSEMBL	gene	NA	NA
ENSMUSG00000001783.3	protein_coding	Rtcb	6.91104	6.79158	6.74209	7.37246	7.19033	7.06797	6.79407	7.16027	7.23465	7.33217	7.05702	7.29058	6.96781	6.94432	7.05887	7.11579	7.20254	7.37656	7.26763	6.23643	6.42434	7.07986	7.0249	7.1897	7.23186	7.30886	7.15198	6.93639	6.78311	6.76823	6.68492	6.79753	7.24158	7.2006	7.27416	chr10	85938637	85957823	19187	-	HAVANA	gene	NA	NA
ENSMUSG00000001785.11	protein_coding	Pwp1	5.46328	5.30204	5.33727	6.17118	5.83852	5.3831	4.78273	5.54802	5.79264	6.11318	5.73642	5.99435	5.30327	5.5249	5.70773	5.56194	5.95502	6.08389	6.02214	4.71523	4.85719	5.87314	5.65752	5.95808	5.96842	5.96005	5.39671	4.85609	4.48807	5.26408	5.46426	5.39596	5.99342	5.98801	6.06578	chr10	85871831	85889096	17266	+	HAVANA	gene	NA	NA
ENSMUSG00000001786.14	protein_coding	Fbxo7	5.03032	4.94583	5.06476	4.94904	4.91297	5.05518	4.9183	4.90721	4.78261	5.04331	5.00678	4.85332	5.1049	5.13085	5.18443	5.17094	5.22777	5.08971	4.99953	5.24776	5.09539	5.20145	5.34756	4.99109	5.18608	5.03854	5.02344	4.94151	4.92871	4.97498	5.06117	5.14643	4.99552	5.15743	5.09732	chr10	86021972	86051873	29902	+	HAVANA	gene	NA	NA
ENSMUSG00000001794.13	protein_coding	Capns1	6.33109	6.32073	6.33561	6.12646	6.10503	6.69474	6.67689	6.16045	6.24926	6.18166	6.4577	6.57399	6.56538	6.35871	6.35807	6.26236	6.39743	6.42913	6.41991	5.98581	6.02942	6.33869	6.36215	6.17885	6.21761	6.18228	6.70064	6.60188	6.42926	6.27061	6.39709	6.29781	6.21223	6.25674	6.20979	chr7	30186936	30198811	11876	-	HAVANA	gene	NA	NA
ENSMUSG00000001829.17	protein_coding	Clpb	4.63065	4.61778	4.70603	5.09452	4.81275	4.61624	4.37476	4.73448	4.81204	4.91734	4.35407	4.58797	4.24561	4.54054	4.72408	4.43645	4.72128	4.83453	4.75862	3.98165	3.91896	4.61682	4.59319	4.91997	4.97985	4.90493	4.89954	4.30828	4.08409	4.33856	4.32526	4.41425	4.89104	4.83929	4.59937	chr7	101663633	101795506	131874	+	HAVANA	gene	NA	NA
ENSMUSG00000001833.16	protein_coding	7-Sep	7.71951	7.64426	7.54923	7.94675	7.90547	8.01949	7.72541	7.67467	7.84391	7.99	7.79928	7.98649	7.86479	8.2342	8.24301	8.08644	7.91648	7.81955	7.96728	7.03561	7.1587	7.79526	7.51398	7.78344	7.67437	7.79868	8.05835	7.96968	7.81828	7.9446	7.90948	8.04779	7.71275	7.71425	7.9943	chr9	25252439	25308571	56133	+	ENSEMBL	gene	NA	NA
ENSMUSG00000001844.10	protein_coding	Zdhhc4	4.24831	4.39677	4.28864	3.89842	3.90884	4.13401	4.12168	4.40522	4.31138	4.10118	4.27591	4.30807	4.41507	4.15358	4.15281	4.19822	4.2768	4.18923	4.12258	4.20058	4.03124	4.14618	4.34247	4.05022	4.03625	4.04858	4.17754	4.30495	4.24012	4.04632	3.92846	4.07689	4.16361	4.27081	3.88788	chr5	143316489	143329256	12768	-	HAVANA	gene	NA	NA
ENSMUSG00000001847.14	protein_coding	Rac1	7.55042	7.24103	7.23802	7.6673	7.61468	8.34885	8.03786	7.76867	7.78629	7.70069	8.16694	8.39914	8.19755	7.59725	7.68354	7.64553	8.12332	8.01821	8.09268	7.5355	7.52641	7.98043	7.88092	7.57709	7.59917	7.61891	8.30757	7.99164	7.9401	7.59245	7.66561	7.55768	7.97634	7.99584	7.96832	chr5	143503634	143528036	24403	-	HAVANA	gene	NA	NA
ENSMUSG00000001855.15	protein_coding	Nup214	6.48643	5.87016	5.8291	7.19287	7.02723	7.20775	6.93426	7.01814	7.17158	7.16122	7.17654	7.29869	7.1417	6.97353	7.06289	6.97744	7.38064	7.40233	7.32767	6.82019	6.8785	7.17754	7.25509	7.07837	7.19523	7.14228	7.2861	6.91817	6.86599	6.96095	6.93293	6.99967	7.37562	7.34486	7.25757	chr2	31974436	32053975	79540	+	HAVANA	gene	NA	NA
ENSMUSG00000001891.16	protein_coding	Ugp2	4.91242	4.74917	4.71665	5.21566	5.22541	5.18922	4.8728	4.85623	4.96597	5.10919	5.25218	5.60231	5.11131	5.00331	5.06681	5.00811	5.40058	5.2183	5.40021	4.58642	4.59605	5.53242	5.1982	5.10445	5.20659	5.04646	5.17735	4.82848	4.83232	4.8257	4.8531	4.70604	5.3829	5.1498	5.41769	chr11	21321138	21371201	50064	-	HAVANA	gene	NA	NA
ENSMUSG00000001909.15	protein_coding	Trmt1	5.99	5.93959	5.89063	6.22641	6.21649	5.81985	5.78303	6.24569	6.29888	6.36173	5.96612	5.98481	5.78054	6.21803	6.39695	6.11485	5.9635	6.12292	5.99833	5.80018	6.03158	5.96483	6.05154	6.2964	6.37912	6.15128	5.88445	5.86628	5.65974	6.15734	6.23048	6.09459	6.11226	5.98157	5.91688	chr8	84686307	84699808	13502	+	HAVANA	gene	NA	NA
ENSMUSG00000001910.4	protein_coding	Nacc1	6.612	6.17908	6.13983	7.23919	7.04298	7.19116	6.91064	6.99777	7.18291	7.3038	7.17968	7.31469	7.01153	7.0025	7.13053	6.92295	7.37156	7.32349	7.34924	6.34615	6.28331	7.10752	7.11831	7.12237	7.24323	7.13955	7.28873	6.69146	6.62987	6.83878	6.95193	6.87835	7.35173	7.3992	7.20028	chr8	84670483	84687862	17380	-	ENSEMBL	gene	NA	NA
ENSMUSG00000001911.16	protein_coding	Nfix	3.40153	2.98385	3.12087	4.46657	4.12616	2.85751	2.84514	4.1476	4.19373	4.20314	3.79123	3.16307	3.99913	4.12175	4.34635	4.00121	3.87296	3.93006	3.61237	3.09785	3.37116	3.06355	3.07484	4.38653	4.65376	4.35956	3.14131	2.45718	2.90894	4.03859	3.93905	4.27211	3.99054	3.95762	3.63204	chr8	84699876	84800344	100469	-	HAVANA	gene	NA	NA
ENSMUSG00000001918.17	protein_coding	Slc1a5	7.44917	7.42065	7.43282	7.67367	7.78527	7.36384	7.11928	7.52476	7.64043	7.70135	7.29763	7.60676	7.01834	7.78583	7.815	7.62047	7.38721	7.50966	7.54891	7.19364	7.18127	7.24588	7.1282	7.5878	7.62042	7.50416	7.51484	6.9731	6.92505	7.72729	7.83848	7.7433	7.49834	7.57798	7.43321	chr7	16781340	16798274	16935	+	HAVANA	gene	NA	NA
ENSMUSG00000001924.15	protein_coding	Uba1	8.32081	8.07219	8.04039	8.77207	8.64321	8.87811	8.52148	8.45863	8.60583	8.73849	8.77487	9.03737	8.6348	8.37427	8.40785	8.37385	8.86125	8.93435	8.97444	7.78978	7.77595	8.73367	8.71126	8.65426	8.71567	8.64068	8.97472	8.32332	8.17287	8.22869	8.25107	8.23666	8.86127	8.86552	8.80434	chrX	20658326	20683179	24854	+	HAVANA	gene	NA	NA
ENSMUSG00000001942.7	protein_coding	Siae	4.11276	4.2639	4.25156	3.74392	3.63694	4.56735	4.55201	3.68837	3.5917	3.66702	3.72658	3.66697	4.09278	3.96319	3.88906	4.06253	4.05669	4.02733	4.05823	3.86118	3.97843	3.78158	3.79242	3.80929	3.92034	3.92832	4.51406	4.47783	4.81548	3.90035	3.98062	3.69886	3.68442	3.88591	3.94966	chr9	37613847	37648318	34472	+	HAVANA	gene	NA	NA
ENSMUSG00000001962.8	protein_coding	Fam50a	4.16534	4.04267	3.86637	4.39519	4.23958	4.47827	4.52612	4.42784	4.50489	4.54382	4.35645	4.49569	4.31911	4.31805	4.45305	4.52803	4.1636	4.47193	4.36265	4.22741	4.48054	4.39569	4.2981	4.36516	4.29271	4.4664	4.53612	4.33469	4.13541	4.29378	4.41896	4.24699	4.29598	4.29177	4.3733	chrX	74313033	74320149	7117	+	HAVANA	gene	NA	NA
ENSMUSG00000001964.14	protein_coding	Emd	5.0289	4.58974	4.66789	5.49376	5.3159	5.8303	5.7989	5.40267	5.33497	5.50936	5.53739	5.74685	5.44864	5.18029	5.26391	5.29395	5.422	5.6185	5.62398	4.88128	4.91759	5.52326	5.55582	5.37753	5.49491	5.50186	5.78865	5.52868	5.56577	5.10293	5.13257	5.15014	5.51862	5.51249	5.35384	chrX	74254687	74261548	6862	+	HAVANA	gene	NA	NA
ENSMUSG00000001995.8	protein_coding	Sipa1l2	4.26867	4.52913	4.5887	3.60119	3.66864	4.06894	4.18923	3.84971	3.8641	3.17844	4.0509	4.26858	3.63789	4.02798	3.96705	3.87722	4.02868	3.88997	4.00117	4.7089	4.455	4.11659	4.39678	3.69649	3.54158	3.5748	3.98244	3.7885	3.94938	4.19288	4.49265	4.32906	4.02686	3.90418	3.9838	chr8	125418063	125492710	74648	-	ENSEMBL	gene	NA	NA
ENSMUSG00000001998.15	protein_coding	Ap4e1	5.37229	5.28409	5.31647	5.27059	5.36421	5.58535	5.34215	5.4347	5.25339	5.30241	5.53197	5.57943	5.46147	5.38704	5.42564	5.33535	5.56981	5.43765	5.63121	5.61615	5.55922	5.47761	5.4076	5.3433	5.42138	5.23571	5.43977	5.41265	5.27757	5.50761	5.46426	5.53733	5.47121	5.48317	5.65075	chr2	127008717	127067909	59193	+	HAVANA	gene	NA	NA
ENSMUSG00000001999.15	protein_coding	Blvra	4.04895	4.06806	4.05035	4.51834	4.09926	4.08365	3.95703	4.09559	4.13232	4.41265	4.2429	4.49079	3.96825	3.97732	3.90235	4.12442	4.15622	4.23358	4.36265	3.18976	3.29828	4.17518	4.06378	4.14283	4.2003	4.34011	4.32423	3.71501	3.67301	3.68936	3.54087	3.58321	4.3034	3.975	4.26639	chr2	127070665	127097084	26420	+	HAVANA	gene	NA	NA
ENSMUSG00000002010.17	protein_coding	Idh3g	6.19006	6.29542	6.28707	6.13241	6.12802	6.35293	6.50363	6.09364	6.14394	6.06069	5.93864	6.12725	6.12365	6.02295	6.03996	6.04456	6.05165	6.14322	6.27383	5.67906	5.73664	5.98217	5.97187	6.12084	5.95316	6.0367	6.52077	6.30154	6.22663	5.84788	6.09273	5.96454	6.12698	6.10118	6.00057	chrX	73778963	73786897	7935	-	HAVANA	gene	NA	NA
ENSMUSG00000002014.12	protein_coding	Ssr4	5.76592	5.76621	5.86971	5.99071	5.89099	5.74661	5.37516	5.72488	5.76382	5.66373	5.60572	5.85844	5.27371	5.8092	5.77794	5.84072	5.82959	5.93694	5.90262	5.36545	5.29166	5.69039	5.66569	5.88489	5.86436	5.84518	5.89623	5.48518	5.48051	5.57866	5.7341	5.65974	5.84877	5.83695	5.72581	chrX	73787028	73790830	3803	+	HAVANA	gene	NA	NA
ENSMUSG00000002015.5	protein_coding	Bcap31	6.05472	6.04352	6.11136	5.97177	5.84547	6.54395	6.36992	5.74304	5.89565	5.99617	6.21093	6.46838	6.27625	5.75145	5.86313	5.77712	6.27673	6.39504	6.39927	5.35332	5.42425	6.17177	6.15136	5.85125	5.74813	5.90269	6.61123	5.99812	5.97898	5.68899	5.69717	5.74592	6.39699	6.28489	6.23482	chrX	73686178	73716175	29998	-	HAVANA	gene	NA	NA
ENSMUSG00000002017.9	protein_coding	Fam98a	4.7929	4.30007	4.37737	5.60792	5.33486	4.88132	4.55841	5.26221	5.34739	5.60725	5.41944	5.72306	4.87865	5.10762	5.03698	5.0782	5.58637	5.63023	5.66833	4.79213	4.91218	5.54802	5.43518	5.4873	5.48151	5.49477	5.01598	4.60261	4.34111	4.98306	4.92406	5.15172	5.73264	5.56293	5.71314	chr17	75537086	75551946	14861	-	HAVANA	gene	NA	NA
ENSMUSG00000002028.12	protein_coding	Kmt2a	8.51788	7.64165	7.76888	9.1574	9.58312	9.09234	9.44347	9.45813	9.3109	9.30784	9.23459	8.68567	9.41416	9.47274	9.40269	9.46001	8.99368	8.88654	8.81538	9.95936	9.62848	9.01801	9.23132	9.53031	9.562	9.36348	9.16804	9.79968	9.65642	9.71352	9.72028	9.68128	8.90308	8.99817	8.92404	chr9	44803355	44881296	77942	-	HAVANA	gene	NA	NA
ENSMUSG00000002031.11	protein_coding	Ift46	3.99381	4.06386	3.97905	3.51281	3.59355	4.5542	4.59623	3.73749	3.6895	3.71236	4.11123	4.31916	4.79789	3.92967	3.59908	3.76512	4.08805	4.11846	3.98742	3.78496	3.6918	3.90442	3.94985	3.58999	3.95374	3.71226	4.42522	4.40804	4.51515	3.65941	3.81813	3.66133	3.9247	3.99218	3.81388	chr9	44767908	44792714	24807	+	HAVANA	gene	NA	NA
ENSMUSG00000002033.13	protein_coding	Cd3g	7.71716	8.09552	8.0726	7.06696	7.14596	7.89257	7.9	7.08438	7.18645	7.00881	7.10444	7.21653	7.14851	7.53272	7.5887	7.44209	7.23486	7.27517	7.30867	7.25741	7.27228	6.99011	7.0371	7.16562	7.14053	7.15481	7.83461	8.04008	8.07187	7.46847	7.62077	7.43864	7.23868	7.21713	7.1234	chr9	44969572	44980431	10860	-	HAVANA	gene	NA	NA
ENSMUSG00000002043.17	protein_coding	Trappc6a	3.68058	4.17126	4.14326	2.99153	3.17486	3.98128	3.90775	2.46593	2.83577	2.17382	2.62284	3.17532	2.88293	3.28742	3.03312	3.37738	3.52623	3.46312	3.47399	3.26075	3.23965	2.95404	2.86017	3.0158	3.11357	3.04512	3.99444	3.64287	3.70473	2.87494	3.06832	3.13129	3.45045	3.35941	3.43632	chr7	19508395	19516145	7751	+	HAVANA	gene	NA	NA
ENSMUSG00000002052.6	protein_coding	Supt6	7.13621	6.75185	6.74648	7.70642	7.49156	7.42742	7.24552	7.45909	7.58763	7.53055	7.52881	7.69387	7.42354	7.47884	7.51758	7.56912	7.62329	7.71871	7.65519	7.35313	7.37339	7.59166	7.71317	7.57819	7.60973	7.64646	7.45557	7.32638	7.24626	7.41409	7.47887	7.46036	7.60273	7.66434	7.57268	chr11	78206746	78245987	39242	-	HAVANA	gene	NA	NA
ENSMUSG00000002055.9	protein_coding	Spag5	4.80613	3.96595	4.40202	5.47622	3.89996	7.25104	7.1106	5.4347	5.87347	5.35338	6.76453	6.93773	7.10947	4.07253	4.13039	4.45764	6.84916	6.83869	6.8233	1.39173	2.08916	6.4227	6.33533	4.93248	4.70511	5.19806	7.24576	6.92013	6.85788	2.83977	2.32913	2.25123	6.64932	6.60822	6.54608	chr11	78301529	78322457	20929	+	HAVANA	gene	NA	NA
ENSMUSG00000002058.13	protein_coding	Unc119	3.40024	4.1216	4.23266	2.67868	2.34157	3.24341	2.80263	1.79846	2.42065	2.64515	3.66658	4.03634	3.1038	1.83681	1.83499	2.12091	3.06471	3.13552	3.64148	1.62488	1.64558	3.38971	3.29889	2.68229	2.99938	2.80215	2.83497	2.59465	2.41609	1.5456	1.15223	1.06581	3.26527	3.24942	3.00891	chr11	78343482	78349164	5683	+	HAVANA	gene	NA	NA
ENSMUSG00000002064.10	protein_coding	Sdf2	4.73453	4.87488	4.94307	4.22201	4.34126	4.86324	4.95325	4.71875	4.62317	4.33403	4.62183	4.47224	4.8324	4.69575	4.53927	4.54603	4.38158	4.45868	4.466	4.62575	4.6779	4.39658	4.44191	4.41081	4.41315	4.5212	4.78503	4.97856	5.21585	4.46604	4.24633	4.44646	4.43124	4.47294	4.32357	chr11	78245746	78255496	9751	+	HAVANA	gene	NA	NA
ENSMUSG00000002068.16	protein_coding	Ccne1	4.61973	4.15752	4.13197	5.73055	4.61537	5.94802	5.43899	4.90003	5.2101	5.20269	5.61368	6.04532	5.51178	4.48887	4.47694	4.73561	5.70869	5.83698	5.89158	3.21679	3.42208	5.56016	5.54557	4.91787	5.17659	5.33365	6.06508	5.18483	4.86544	3.73792	3.58197	3.56977	5.84623	5.88142	5.77051	chr7	38097984	38107534	9551	-	HAVANA	gene	NA	NA
ENSMUSG00000002102.15	protein_coding	Psmc3	6.71042	6.52971	6.53352	7.16808	6.86042	7.18305	6.69443	6.72818	6.99074	7.19957	7.07517	7.39383	7.04776	6.58548	6.71589	6.6998	7.26562	7.37359	7.36462	5.97924	6.02509	7.09208	7.17369	6.94779	6.95149	7.07256	7.26694	6.66839	6.48435	6.29516	6.32832	6.28758	7.20936	7.19412	7.13294	chr2	91054009	91066369	12361	+	HAVANA	gene	NA	NA
ENSMUSG00000002103.15	protein_coding	Acp2	4.46017	4.75334	4.66096	4.178	4.10368	4.24784	4.21798	4.12443	4.12467	4.19997	3.95821	3.99911	4.46667	4.46357	4.45675	4.27531	4.12745	4.05531	3.95562	4.5666	4.45368	3.90739	3.92664	4.38856	4.38334	4.39172	4.39515	4.41912	4.45246	4.36304	4.45229	4.42205	3.83968	3.87549	3.6301	chr2	91202885	91214098	11214	+	HAVANA	gene	NA	NA
ENSMUSG00000002107.18	protein_coding	Celf2	8.12181	7.81407	7.74518	8.13172	7.89712	9.18961	9.34902	8.05167	7.97521	8.07879	8.70702	8.74931	8.91096	8.24056	8.35604	8.28179	8.71527	8.5897	8.76498	7.99922	8.03652	8.58346	8.3604	7.9646	8.03724	8.09901	9.13409	9.416	9.52686	8.14202	8.05462	8.07896	8.44653	8.37729	8.60211	chr2	6539694	7509563	969870	-	HAVANA	gene	NA	NA
ENSMUSG00000002109.14	protein_coding	Ddb2	5.88795	6.03861	6.15783	5.53637	5.65132	5.76441	5.75956	5.84528	5.64962	5.79067	5.62516	5.19451	5.99121	5.94676	5.89204	6.01932	5.4141	5.33905	5.27286	6.12395	6.15113	5.30358	5.39504	5.62509	5.6393	5.5907	5.728	6.00576	5.99358	5.94639	5.97049	5.90948	5.35668	5.08375	5.17023	chr2	91211572	91236982	25411	-	HAVANA	gene	NA	NA
ENSMUSG00000002129.11	protein_coding	Sf3a1	6.73167	6.21671	6.23261	7.49142	7.21022	7.51941	7.25945	7.12147	7.29947	7.46092	7.37378	7.61691	7.33419	6.99844	7.15226	6.98062	7.55056	7.56278	7.57932	6.16305	6.22249	7.34809	7.33925	7.33456	7.40228	7.38775	7.58531	7.16055	7.07868	6.84783	6.80404	6.85406	7.54369	7.58436	7.47057	chr11	4160350	4182541	22192	+	HAVANA	gene	NA	NA
ENSMUSG00000002147.18	protein_coding	Stat6	7.40552	7.63317	7.50697	7.14475	7.37384	7.27447	7.32849	7.13681	7.26228	7.08963	7.11114	7.15365	6.81152	7.37622	7.28084	7.32218	6.98967	7.04316	7.07252	7.54646	7.47847	7.16472	7.10435	7.34551	7.3897	7.23516	7.22935	7.3529	7.26925	7.42241	7.48834	7.51427	7.17841	7.15271	7.06777	chr10	127642986	127660957	17972	+	HAVANA	gene	NA	NA
ENSMUSG00000002205.16	protein_coding	Vrk3	5.5682	5.30736	5.36067	5.33258	5.64222	6.09143	6.29906	5.87511	5.77871	5.27548	5.79452	5.75404	5.94488	5.68843	5.59488	5.71561	5.83422	5.69933	5.68759	6.19625	6.11447	5.74266	5.86135	5.59481	5.60229	5.43717	5.95576	6.31072	6.43163	5.75655	5.7907	5.8357	5.65646	5.6762	5.70549	chr7	44748413	44777515	29103	+	HAVANA	gene	NA	NA
ENSMUSG00000002210.11	protein_coding	Smg9	5.12347	5.29219	5.15851	4.87455	4.8775	5.04816	5.32724	5.19493	5.12203	4.88998	4.88019	4.8007	5.21567	5.02614	5.10947	5.01221	4.78487	4.84219	4.60716	5.46839	5.21575	4.81222	5.12219	4.99939	5.0187	4.96729	5.17208	5.51291	5.46053	5.03451	5.17298	5.06815	4.6849	4.65205	4.71569	chr7	24399619	24422778	23160	+	HAVANA	gene	NA	NA
ENSMUSG00000002221.11	protein_coding	Paxip1	5.74835	5.31535	5.19043	6.42534	5.98003	6.58072	6.1481	6.2471	6.35791	6.51478	6.60584	6.72441	6.65294	5.91453	6.07071	6.03754	6.74048	6.67249	6.62709	5.41881	5.53657	6.37539	6.46474	6.24719	6.24774	6.17525	6.57639	6.08138	5.80581	5.64128	5.58034	5.65338	6.5929	6.611	6.49371	chr5	27740080	27791691	51612	-	HAVANA	gene	NA	NA
ENSMUSG00000002222.14	protein_coding	Rmnd5a	7.36455	7.30973	7.37029	7.2841	7.34306	7.5745	7.77022	7.41801	7.33208	7.41915	7.2367	7.08791	7.57538	7.51264	7.43479	7.4572	7.30494	7.17902	7.14325	7.40083	7.42232	7.14103	7.04562	7.36525	7.30949	7.27803	7.61542	7.82174	7.8321	7.55232	7.59172	7.56849	7.04865	7.14888	7.23571	chr6	71388634	71440637	52004	-	HAVANA	gene	NA	NA
ENSMUSG00000002227.15	protein_coding	Mov10	5.89633	5.318	5.37894	6.20472	6.13938	6.44698	6.24255	6.43997	6.4178	6.34023	7.03235	6.96181	6.73818	5.97681	6.03393	6.19636	7.18406	7.38346	7.2046	5.66768	5.67575	6.78392	6.82571	6.51174	6.357	6.40816	6.46003	6.09496	5.9983	5.8611	5.76416	5.81875	7.00722	7.06512	6.97108	chr3	104794836	104818563	23728	-	HAVANA	gene	NA	NA
ENSMUSG00000002228.7	protein_coding	Ppm1j	3.70927	3.89914	3.99409	2.96512	2.91771	4.38927	4.37476	3.06221	3.06362	2.75321	4.27591	4.38396	4.36789	3.10212	2.90688	3.06657	3.83893	3.93723	4.11943	3.18976	3.20942	3.80404	3.76226	2.8143	2.52789	2.74633	4.06443	3.99303	4.33098	2.6498	2.72124	2.70912	3.77261	3.7612	3.52015	chr3	104781056	104786018	4963	+	HAVANA	gene	NA	NA
ENSMUSG00000002250.15	protein_coding	Ppard	3.54684	2.9267	3.02461	4.04112	4.37388	4.16547	4.06886	4.10185	4.15785	4.07017	4.03911	4.00579	3.7928	4.42502	4.11524	4.02651	4.25969	3.98298	4.00801	4.19153	4.05693	4.29362	4.20505	4.1922	4.10157	4.14886	4.04148	3.67423	3.75608	4.19288	4.28435	4.29679	4.29598	4.30557	4.10511	chr17	28232754	28301469	68716	+	HAVANA	gene	NA	NA
ENSMUSG00000002257.7	protein_coding	Def6	6.37234	6.60721	6.58286	5.87049	5.96946	6.50553	6.50031	6.05056	6.19725	5.93151	6.34976	6.5536	6.32304	6.12273	6.10274	5.88498	6.33834	6.21355	6.24665	5.96071	5.86097	6.14124	6.2251	5.95399	5.80676	5.98438	6.49917	6.33299	6.39484	5.92751	6.02976	5.98747	6.13115	6.21712	6.17512	chr17	28207778	28228608	20831	+	HAVANA	gene	NA	NA
ENSMUSG00000002279.18	protein_coding	Lmf1	4.37926	4.30364	4.26196	4.24417	4.53737	4.66598	4.27724	4.45991	4.32272	4.33652	4.25568	3.98853	4.30805	4.55318	4.83224	4.53943	4.3786	4.28507	4.35195	4.84507	4.6921	4.26423	4.40238	4.57913	4.64503	4.3956	4.50009	4.45092	4.60472	4.92132	4.81339	4.71217	4.36143	4.40512	4.29387	chr17	25579174	25662826	83653	+	HAVANA	gene	NA	NA
ENSMUSG00000002280.10	protein_coding	Narfl	4.42406	4.81683	4.72894	4.07182	3.90733	4.31214	4.06104	3.92409	4.10238	3.99611	4.04053	3.98013	3.65485	4.28526	4.22076	3.99061	3.97806	4.08534	3.99593	4.1047	4.16567	4.07833	4.25452	4.05934	4.32403	4.033	4.33327	4.13078	3.96146	3.9651	4.03392	4.22889	4.05069	4.25638	3.82117	chr17	25773776	25783332	9557	+	HAVANA	gene	NA	NA
ENSMUSG00000002297.15	protein_coding	Dbf4	5.76331	5.28047	5.44064	6.10999	5.43659	7.08361	7.02421	5.76984	6.07189	5.97958	6.67933	7.03383	6.82128	5.34407	5.47986	5.58826	6.79495	6.77859	6.97087	4.88494	5.07822	6.60102	6.37218	5.62338	5.51227	5.9353	7.0773	6.953	6.87773	5.12493	5.19248	5.04405	6.71756	6.62208	6.73084	chr5	8396973	8422716	25744	-	HAVANA	gene	NA	NA
ENSMUSG00000002307.15	protein_coding	Daxx	5.96413	5.96178	5.91587	5.79661	5.9242	6.08871	6.22455	5.99357	6.05839	5.8788	6.0045	5.91435	6.28333	5.8197	5.91653	5.84877	5.90196	6.06846	6.26886	6.10635	6.01638	6.00576	6.214	5.74417	5.85807	5.81158	6.05365	6.11224	6.21658	5.83231	5.89221	6.00005	5.92772	6.00079	5.87882	chr17	33909414	33915589	6176	+	HAVANA	gene	NA	NA
ENSMUSG00000002319.15	protein_coding	Ipo4	4.88769	4.65095	4.62831	5.82184	5.72206	4.39595	3.70159	5.33844	5.63866	5.73534	5.34877	5.60668	4.58388	5.35101	5.49493	5.16543	5.33579	5.42683	5.36552	4.50133	4.7156	5.35585	5.34299	5.75155	5.83495	5.75469	4.70264	3.29901	2.93333	5.13135	5.5654	5.22686	5.46129	5.33746	5.39668	chr14	55625400	55637895	12496	-	HAVANA	gene	NA	NA
ENSMUSG00000002320.15	protein_coding	Tm9sf1	5.51698	5.44342	5.36424	5.6194	5.34196	5.93565	5.6816	5.6164	5.58917	5.61607	5.9128	5.97181	5.74052	5.37494	5.38162	5.49762	5.94925	5.95341	6.0334	5.12722	5.04293	5.79246	5.75963	5.5052	5.61009	5.53406	5.99463	5.57363	5.40255	5.21771	5.42865	5.28477	5.9205	5.96998	5.78433	chr14	55635965	55643806	7842	-	HAVANA	gene	NA	NA
ENSMUSG00000002325.14	protein_coding	Irf9	6.83523	7.11468	7.07319	6.02019	6.63727	6.43152	6.92739	6.97076	6.81888	6.55533	6.72126	6.24487	7.39674	6.58335	6.78101	6.65551	6.23005	6.28726	6.27376	6.5347	6.64274	6.42236	6.4876	6.4667	6.6093	6.2756	6.46023	6.95641	7.1313	6.70368	6.62719	6.95445	6.21223	6.28315	6.14559	chr14	55603571	55610030	6460	+	HAVANA	gene	NA	NA
ENSMUSG00000002326.5	protein_coding	Gmpr2	4.03398	3.94097	3.63	4.36269	4.18215	4.63884	4.2299	4.21022	4.25807	4.35092	4.41916	4.57646	4.23104	4.07692	4.14164	4.02245	4.47368	4.44954	4.51187	3.91169	3.91896	4.48177	4.33664	4.22984	4.16814	4.43438	4.55785	4.38295	4.30017	3.91731	4.06999	3.86213	4.3034	4.47398	4.55463	chr14	55672235	55678750	6516	+	ENSEMBL	gene	NA	NA
ENSMUSG00000002329.6	protein_coding	Mdp1	5.21022	5.57797	5.42777	4.77737	4.89547	4.799	5.13078	5.1305	4.99034	4.6361	4.99443	4.84548	4.77596	4.96364	4.95428	5.08211	4.59052	4.76974	4.56841	5.12741	5.12148	4.69097	4.67643	4.92832	4.60052	4.8618	4.91436	5.3654	5.32765	5.12128	5.17745	5.10123	4.81	4.97507	4.6587	chr14	55657879	55660508	2630	-	ENSEMBL	gene	NA	NA
ENSMUSG00000002332.15	protein_coding	Dhrs1	4.0468	3.94783	4.10912	3.58395	3.36749	4.92895	4.86765	3.94689	3.83906	3.57676	4.31307	4.32742	4.36255	4.02798	3.8935	3.96441	4.07246	3.90833	4.05493	4.05339	3.96039	3.91477	3.94602	3.8183	3.87622	3.70739	4.63399	4.76678	4.98002	3.71869	3.92846	4.06736	3.96269	3.94885	3.76563	chr14	55739020	55745690	6671	-	HAVANA	gene	NA	NA
ENSMUSG00000002342.17	protein_coding	Tmem161a	4.19155	4.46686	4.55019	3.82324	3.8175	4.06894	4.05987	3.77326	3.96592	3.92369	3.83618	3.71393	3.77683	3.93933	3.84842	3.75047	3.9196	3.76661	3.98396	3.99733	3.89541	3.81513	3.87127	3.92647	3.9155	3.9897	3.97033	3.82622	3.69423	3.8304	3.79502	4.09577	3.80434	3.73083	3.86057	chr8	70172356	70183681	11326	+	HAVANA	gene	NA	NA
ENSMUSG00000002345.17	protein_coding	Borcs8	3.80646	4.11145	4.11848	2.99153	3.21835	3.69539	3.8463	3.18533	3.39098	2.77901	3.55516	3.52094	3.54668	3.67033	3.64726	3.45772	3.63108	3.54048	3.35045	3.58508	3.48652	3.35972	3.48984	3.40493	3.12199	3.1348	3.78006	3.91203	4.31051	3.53301	3.46967	3.58321	3.61455	3.52199	3.59938	chr8	70139499	70167488	27990	+	HAVANA	gene	NA	NA
ENSMUSG00000002365.9	protein_coding	Snx9	4.66357	4.31429	4.33467	4.92337	4.6369	5.48777	5.74144	4.45012	4.78607	4.93274	4.95891	5.70838	5.34177	5.14982	5.45752	5.23196	5.2903	5.42113	5.57712	3.40875	3.46749	4.82691	4.67874	4.69377	4.61551	4.94886	5.52084	5.5696	5.55779	4.82119	4.90799	4.58432	5.1842	5.1498	5.05378	chr17	5841328	5931033	89706	+	ENSEMBL	gene	NA	NA
ENSMUSG00000002372.8	protein_coding	Ranbp3	6.02716	6.20877	6.15333	5.97839	5.8151	5.85994	5.75822	5.89238	6.02061	5.99066	5.95676	6.17838	5.80732	5.74733	5.75247	5.70172	6.06648	6.14011	6.14109	5.57147	5.57857	5.921	6.00629	6.03548	5.83265	5.928	6.00899	5.60529	5.59494	5.66659	5.68464	5.47018	6.18838	6.113	5.93226	chr17	56673225	56711769	38545	+	ENSEMBL	gene	NA	NA
ENSMUSG00000002379.6	protein_coding	Ndufa11	4.07398	4.04481	4.00898	4.02524	4.21831	4.45865	4.30033	3.98468	4.09314	3.99512	4.40081	4.503	4.29969	3.76024	3.86209	3.82226	4.48845	4.47931	4.48519	3.43201	3.30544	4.29887	4.31602	4.08425	4.09731	3.96953	4.64923	4.1574	3.92266	3.77563	3.88534	3.5425	4.49056	4.50423	4.26639	chr17	56717762	56724248	6487	+	ENSEMBL	gene	NA	NA
ENSMUSG00000002395.14	protein_coding	Use1	5.60359	6.2096	6.15998	4.98215	5.03986	4.82332	4.89825	5.23965	5.24388	4.80255	4.97291	4.68116	4.79392	5.33861	5.38202	5.3255	4.80388	4.71656	4.54747	5.42462	5.54265	4.59767	4.7682	5.20753	5.22625	5.04453	4.79591	5.13874	5.24379	5.2707	5.40823	5.35737	4.62694	4.83453	4.63741	chr8	71366848	71369732	2885	+	HAVANA	gene	NA	NA
ENSMUSG00000002396.8	protein_coding	Ocel1	4.56705	5.07268	4.99359	3.72095	4.22544	3.80033	4.42732	4.43031	4.29313	3.21676	4.27613	3.84538	3.84947	4.16704	3.95251	4.13012	3.91593	3.99924	3.85968	4.7951	4.73034	4.09324	4.18504	3.77363	3.65681	3.89307	3.97753	4.296	4.45907	4.27791	4.57026	4.48907	4.05895	3.96233	3.90286	chr8	71371298	71379361	8064	+	HAVANA	gene	NA	NA
ENSMUSG00000002413.15	protein_coding	Braf	6.0138	5.79262	5.85904	6.43086	6.43812	6.12295	6.07631	6.21231	6.16574	6.3787	5.96218	6.03022	6.15848	6.28014	6.2426	6.30485	5.84344	5.8001	5.99002	6.44989	6.38182	6.04113	5.99401	6.2956	6.53623	6.39873	6.18019	6.32062	6.19136	6.51592	6.48277	6.47229	5.85888	5.96861	5.93134	chr6	39603237	39725463	122227	-	HAVANA	gene	NA	NA
ENSMUSG00000002416.13	protein_coding	Ndufb2	4.47456	4.43099	4.41253	4.56037	4.73501	4.5621	4.51299	4.6092	4.52784	4.6824	4.52445	4.61969	4.28622	4.49753	4.46502	4.50448	4.48845	4.54177	4.56756	4.22262	4.30561	4.40678	4.29299	4.63886	4.57297	4.47659	4.80412	4.24024	4.10911	4.83911	4.58172	4.39853	4.72414	4.59135	4.98557	chr6	39592574	39603382	10809	+	HAVANA	gene	NA	NA
ENSMUSG00000002428.12	protein_coding	Hltf	6.45721	6.59962	6.62455	6.12944	6.30658	6.47725	6.48695	6.16644	6.24014	6.19528	6.28388	6.36316	6.32304	6.29526	6.37088	6.39461	6.17268	6.07172	6.32531	6.31254	6.36558	6.26441	6.11771	6.11353	6.20725	6.21777	6.3016	6.50854	6.63048	6.38786	6.4331	6.47048	6.19039	6.19689	6.35384	chr3	20057811	20118490	60680	+	HAVANA	gene	NA	NA
ENSMUSG00000002455.14	protein_coding	Prpf6	6.29927	6.18805	6.19458	6.48637	6.45337	6.52655	6.43398	6.25836	6.39758	6.36031	6.27826	6.4299	6.10618	6.30929	6.43709	6.42798	6.41299	6.48891	6.4434	6.34558	6.28633	6.37788	6.43568	6.42957	6.41211	6.4415	6.62223	6.5521	6.51374	6.37256	6.33234	6.43571	6.39352	6.52067	6.30909	chr2	181591868	181655660	63793	+	HAVANA	gene	NA	NA
ENSMUSG00000002458.13	protein_coding	Rgs19	5.97732	6.23598	6.13248	5.72466	5.59625	5.88116	5.69281	5.71265	5.71391	5.62277	5.9497	6.06027	5.48255	5.63298	5.65241	5.65531	5.93252	5.96965	5.95481	5.67094	5.71797	5.90291	5.78195	5.7618	5.85429	5.65618	5.77158	5.63614	5.63389	5.58398	5.76118	5.91756	5.89616	5.89061	5.98168	chr2	181688419	181693977	5559	-	HAVANA	gene	NA	NA
ENSMUSG00000002477.4	protein_coding	Snrpd1	5.48208	4.95487	4.91415	6.49434	6.02359	6.41894	5.76377	5.88421	6.14326	6.59795	6.36339	6.72173	6.20262	5.72497	5.87205	5.81863	6.62557	6.7815	6.8737	4.13573	4.30582	6.38282	6.25397	6.09137	6.09343	6.31289	6.40858	5.58756	5.47894	5.21689	5.22553	5.26448	6.60497	6.58574	6.69006	chr18	10617796	10628230	10435	+	ENSEMBL	gene	NA	NA
ENSMUSG00000002486.15	protein_coding	Tchp	4.25144	4.34694	4.16336	4.15047	4.42997	4.0006	3.97504	4.24743	4.36718	4.23456	4.0238	3.9528	3.74386	4.43856	4.59628	4.20898	4.06853	4.10865	4.03835	4.7801	4.63921	4.16645	4.24903	4.32778	4.30386	4.35885	4.02206	4.17943	4.34446	4.61809	4.71829	4.40671	4.03579	4.24237	3.94966	chr5	114707760	114722327	14568	+	HAVANA	gene	NA	NA
ENSMUSG00000002489.15	protein_coding	Tiam1	4.80377	4.69179	4.64856	5.1945	5.14879	4.37737	4.6983	5.18316	5.18175	5.56092	5.00355	4.63532	5.46521	5.23068	5.12656	5.13192	5.44213	5.36508	4.92303	4.16863	3.76638	4.50935	4.29208	5.39543	5.41283	5.48485	4.72084	4.47189	4.32419	4.74245	4.95046	4.99963	4.9347	5.21709	4.93663	chr16	89787111	89980080	192970	-	HAVANA	gene	NA	NA
ENSMUSG00000002496.9	protein_coding	Tsc2	5.6285	5.59425	5.56187	5.73137	5.50332	5.88985	5.84388	5.58121	5.68371	5.70799	5.6271	5.75886	5.70228	5.62028	5.56565	5.5743	5.69669	5.63672	5.64175	5.69458	5.59601	5.6346	5.60635	5.74702	5.76595	5.72529	5.97316	5.78591	5.78219	5.5359	5.53272	5.61672	5.82872	5.60803	5.52782	chr17	24595937	24632629	36693	-	ENSEMBL	gene	NA	NA
ENSMUSG00000002524.15	protein_coding	Puf60	6.60724	6.69135	6.65327	6.66461	6.54306	6.71556	6.41646	6.49813	6.61783	6.58288	6.6949	6.87571	6.53069	6.34151	6.37804	6.36608	6.83767	6.89593	6.84206	6.09668	6.08875	6.69612	6.74757	6.49357	6.67789	6.51988	6.70125	6.27621	6.04344	6.23722	6.25821	6.29168	6.84252	6.86288	6.71441	chr15	76070184	76080946	10763	-	ENSEMBL	gene	NA	NA
ENSMUSG00000002546.16	protein_coding	Golga2	5.56669	5.87931	5.77126	4.99363	5.03581	5.73617	5.48003	5.24815	5.33064	5.06618	5.36739	5.49761	5.46022	5.20271	5.17119	5.22315	5.25447	5.35574	5.37269	5.42655	5.28804	5.32296	5.5006	5.17807	5.26859	5.12151	5.61455	5.58481	5.75496	5.09169	5.32192	5.17853	5.10997	5.18009	5.12053	chr2	32287384	32307921	20538	+	HAVANA	gene	NA	NA
ENSMUSG00000002550.16	protein_coding	Uck1	5.17363	5.41487	5.37459	4.96791	5.00315	4.85147	4.80465	4.99732	5.0527	4.86557	5.04061	5.08515	4.84973	4.98785	4.8087	4.93182	4.90407	5.0314	4.90062	4.99269	4.89003	4.94889	4.97558	4.99501	4.94712	5.04777	5.06256	4.80275	4.8156	4.88577	4.8918	4.9694	5.09978	5.14604	4.92732	chr2	32255002	32260159	5158	-	HAVANA	gene	NA	NA
ENSMUSG00000002578.15	protein_coding	Ikzf4	3.63724	2.4675	2.51428	5.00501	5.37065	3.56513	3.5577	5.4799	5.62149	5.62395	5.17756	5.25792	5.34312	4.83246	4.63662	4.64877	4.93902	5.00287	4.57533	4.99314	4.44855	4.64611	4.60295	5.50834	5.34431	5.32415	3.65961	3.94669	3.59619	4.70386	4.79019	4.69988	4.69622	4.74617	4.73085	chr10	128630843	128645991	15149	-	HAVANA	gene	NA	NA
ENSMUSG00000002580.7	protein_coding	Mien1	4.29823	4.20215	4.23263	4.60423	4.588	4.24934	4.09551	4.49113	4.54605	4.62182	4.22995	4.42298	4.29098	4.32911	4.50027	4.34835	4.37533	4.43439	4.33282	4.12173	4.13508	4.55408	4.28885	4.50562	4.46468	4.632	4.47453	4.29133	4.27511	4.15761	4.24224	4.27202	4.38254	4.4241	4.44859	chr11	98437708	98438991	1284	-	HAVANA	gene	NA	NA
ENSMUSG00000002602.16	protein_coding	Axl	3.74533	5.36912	5.34999	2.12017	1.56033	3.03206	3.22901	2.25722	2.66819	2.80435	3.43891	3.92462	4.08955	0.456207	0.759607	1.27928	2.6259	2.73586	2.89994	0.31413	0.853272	2.37768	2.32427	1.58118	1.55089	2.56462	2.96264	3.034	3.1507	0.0899451	0.63225	-0.0263851	2.27911	2.08279	2.54326	chr7	25757273	25788705	31433	-	HAVANA	gene	NA	NA
ENSMUSG00000002603.15	protein_coding	Tgfb1	6.25147	5.28499	5.49365	7.11203	6.9758	7.23341	7.26533	6.90699	7.09984	6.97527	7.41425	7.87772	7.33589	6.89803	6.74693	6.78311	7.33874	7.55085	7.46917	6.4725	6.46729	7.25134	7.28268	7.07968	6.9934	7.02252	7.44804	7.1647	6.83776	6.68274	6.83977	6.69137	7.48535	7.5073	7.42625	chr7	25687002	25705077	18076	+	HAVANA	gene	NA	NA
ENSMUSG00000002608.8	protein_coding	Ccdc97	5.09713	4.68634	4.66275	5.38331	5.3898	5.3979	5.51665	5.42848	5.43877	5.39011	5.57034	5.39523	5.56737	5.65219	5.57565	5.55353	5.48547	5.41985	5.38192	5.74399	5.64361	5.54802	5.65047	5.40891	5.52025	5.50461	5.56443	5.53015	5.71399	5.55446	5.68464	5.63736	5.43112	5.57153	5.37651	chr7	25711106	25719088	7983	-	HAVANA	gene	NA	NA
ENSMUSG00000002617.14	protein_coding	Zfp40	3.40917	3.74498	3.8249	3.22641	3.27439	3.39269	3.29182	3.29877	2.9571	3.04306	3.03837	2.80125	2.68327	2.73169	2.95871	3.07444	2.6576	2.7923	2.91455	3.10548	3.29828	2.82094	2.48067	3.21323	3.22721	3.0218	2.97076	3.4205	3.20345	3.47689	3.23218	3.03675	3.0171	2.44903	2.95828	chr17	23173869	23193252	19384	-	HAVANA	gene	NA	NA
ENSMUSG00000002625.9	protein_coding	Akap8l	5.73699	6.33953	6.28861	4.81851	5.27775	4.82112	4.8573	5.28854	5.24864	4.93082	4.80912	4.37867	4.5243	5.69129	5.58804	5.67999	4.61764	4.56512	4.40207	6.67694	6.59847	5.06085	5.37521	5.19027	5.21449	5.1105	4.91646	5.25046	5.3875	5.71348	5.87303	5.70039	4.40347	4.4617	4.68489	chr17	32321425	32350581	29157	-	ENSEMBL	gene	NA	NA
ENSMUSG00000002635.11	protein_coding	Pdcd2l	3.38303	3.76582	3.69285	3.2648	3.0031	2.81995	2.75884	3.02971	2.93364	3.11233	3.1576	3.11933	2.67468	3.08482	2.87126	2.87283	3.17835	3.38661	3.39281	2.87602	2.96896	3.05733	3.09269	2.9921	3.2958	3.18465	3.03415	2.74006	2.70453	2.92614	2.69651	3.01708	3.28039	3.24942	3.39885	chr7	34184499	34196661	12163	-	HAVANA	gene	NA	NA
ENSMUSG00000002658.9	protein_coding	Gtf2f1	5.5872	5.60569	5.50662	5.83174	5.59625	6.08414	5.57148	5.50139	5.67464	5.66257	5.67873	6.07914	5.96624	5.37108	5.55194	5.40714	5.82028	6.05452	6.07188	4.33002	4.57841	5.76381	5.88354	5.62595	5.60979	5.75377	6.18688	5.68315	5.55199	4.91288	5.25149	5.06815	5.91324	5.92456	5.82333	chr17	57003405	57011288	7884	-	ENSEMBL	gene	NA	NA
ENSMUSG00000002660.7	protein_coding	Clpp	3.83954	3.98385	3.84164	4.22483	4.00305	3.60648	3.21287	3.74151	4.15278	4.16452	3.61592	3.94624	3.53723	3.72159	3.72415	3.75047	3.80631	4.05066	3.89832	3.24333	3.33374	3.86936	3.74913	4.17476	4.27394	4.21547	3.86532	2.98482	2.87217	3.43037	3.635	3.48638	4.11384	4.16875	3.94966	chr17	56990264	56996371	6108	+	ENSEMBL	gene	NA	NA
ENSMUSG00000002668.7	protein_coding	Dennd1c	5.93787	6.1837	6.11767	5.36197	5.6945	5.65228	5.88586	5.8418	5.89109	5.41637	5.39307	5.19611	5.44009	6.2533	6.02586	6.16817	5.49281	5.20202	5.30774	6.37487	6.28814	5.61727	5.58181	5.81793	5.57341	5.4763	5.77738	6.32561	6.40694	5.98094	6.06401	6.04446	5.31477	5.18009	5.15466	chr17	57066056	57078510	12455	-	ENSEMBL	gene	NA	NA
ENSMUSG00000002679.14	protein_coding	Med6	3.48575	3.70508	3.65861	3.45706	3.21835	3.4103	2.82404	3.26007	3.34726	3.366	3.34633	3.52094	3.25553	3.30993	3.19314	3.26509	3.36275	3.54518	3.36648	2.85323	3.0221	3.33423	3.37492	3.16458	3.28834	3.30545	3.55544	3.22258	3.42905	3.20017	3.08748	3.05616	3.40978	3.26364	3.65342	chr12	81573557	81595008	21452	-	HAVANA	gene	NA	NA
ENSMUSG00000002699.13	protein_coding	Lcp2	7.79571	7.61803	7.54838	7.79784	7.77983	8.3687	8.06362	7.61129	7.73104	7.92722	8.06907	8.33932	8.19629	7.86237	7.96929	7.93681	7.99614	8.11418	8.20781	7.98191	7.95999	8.13041	8.03861	7.79176	7.78124	7.94945	8.39128	8.34114	8.36478	7.89139	7.92952	7.9039	7.95698	7.94733	7.93226	chr11	34046920	34092295	45376	+	HAVANA	gene	NA	NA
ENSMUSG00000002718.14	protein_coding	Cse1l	6.82493	6.38613	6.48863	7.69542	7.32907	7.27968	6.89993	7.09777	7.34381	7.60879	7.38836	7.80268	7.11477	6.90852	7.01874	7.02338	7.62227	7.66861	7.72116	6.07715	6.34313	7.56298	7.39579	7.37177	7.50525	7.44109	7.40822	6.5937	6.38834	6.7729	6.73284	6.66633	7.68461	7.57584	7.75638	chr2	166906040	166946389	40350	+	HAVANA	gene	NA	NA
ENSMUSG00000002728.14	protein_coding	Naa20	5.3189	5.04814	5.02665	5.76683	5.84647	5.72339	5.52583	5.51971	5.76499	6.0476	5.65192	5.73156	5.72247	5.49697	5.64142	5.49054	5.76452	5.82301	6.06259	4.57887	4.62711	5.65585	5.51752	5.66931	5.68784	5.52009	5.91247	5.46326	5.34374	5.31571	5.23385	5.43207	5.81433	5.87426	5.98697	chr2	145902099	145916425	14327	+	HAVANA	gene	NA	NA
ENSMUSG00000002733.8	protein_coding	Plekha3	4.88045	4.93201	4.80177	5.01309	4.98635	4.26243	4.18923	5.0404	5.01291	5.02725	5.43526	5.45928	5.66059	4.89583	4.93069	4.98327	4.84117	4.91481	5.01745	5.00093	5.11742	5.01187	5.02571	4.97944	5.02095	4.92182	4.15988	4.25397	4.36446	4.97498	4.74266	5.0489	4.61506	4.64663	5.05378	chr2	76675281	76696828	21548	+	HAVANA	gene	NA	NA
ENSMUSG00000002741.9	protein_coding	Ykt6	5.93634	5.81076	5.84434	6.08031	5.9242	6.28452	6.07854	5.82864	6.02894	6.00803	6.30556	6.65006	6.25335	5.80393	5.8529	5.76016	6.31782	6.35545	6.33078	5.52356	5.4077	6.24197	6.20361	6.01994	6.00188	6.06359	6.2748	6.09786	6.05374	5.72316	5.65927	5.75486	6.20829	6.2244	6.12244	chr11	5955693	5967780	12088	+	HAVANA	gene	NA	NA
ENSMUSG00000002748.7	protein_coding	Baz1b	8.33318	7.90501	7.94373	8.883	8.67348	9.00927	8.82272	8.64568	8.74502	8.8717	8.81331	8.93758	8.9113	8.54763	8.46441	8.62147	9.07015	9.0618	9.0915	8.1513	8.1847	8.88064	8.81239	8.70207	8.67798	8.79423	9.05607	8.66989	8.57564	8.27467	8.33861	8.32331	9.00842	9.05674	9.06727	chr5	135187264	135246129	58866	+	HAVANA	gene	NA	NA
ENSMUSG00000002763.16	protein_coding	Pex6	4.8832	5.13687	5.16074	4.38028	4.41184	4.60098	4.87792	4.72233	4.62877	4.57851	4.86191	4.58797	4.97626	4.7743	4.66029	4.51653	4.25969	4.42934	4.40983	4.92647	4.78983	4.27499	4.3011	4.65405	4.56391	4.5339	4.76121	4.93373	4.87011	4.62342	4.69974	4.77208	4.69057	4.56289	4.12819	chr17	46711463	46725541	14079	+	HAVANA	gene	NA	NA
ENSMUSG00000002767.13	protein_coding	Mrpl2	4.22329	4.15949	4.02616	4.83864	4.66338	4.38333	4.26163	4.32715	4.5899	4.69375	4.47708	4.80267	4.40991	4.37252	4.29401	4.19462	4.54322	4.74748	4.69019	3.19883	3.31257	4.36833	4.51781	4.66408	4.62443	4.76447	4.7376	3.87202	3.73063	3.68936	3.93905	3.69886	4.69622	4.51615	4.70037	chr17	46646229	46650139	3911	+	HAVANA	gene	NA	NA
ENSMUSG00000002768.7	protein_coding	Mea1	4.18555	4.2597	4.25127	4.45768	4.28366	4.14443	3.66136	4.15473	4.3798	4.42558	4.19214	4.51949	3.94061	4.05727	4.08182	4.06166	4.08039	4.33635	4.11542	3.53963	3.46352	4.35039	4.17758	4.41655	4.63488	4.46465	4.18143	3.78602	3.78781	3.53883	4.02709	3.83013	4.17555	4.26714	4.16623	chr17	46681137	46683105	1969	+	ENSEMBL	gene	NA	NA
ENSMUSG00000002778.14	protein_coding	Kdelr1	4.9534	4.80939	4.73169	4.75442	4.85929	5.72448	5.71016	5.00406	5.0185	4.90568	5.46639	5.39785	5.47514	4.7716	4.85976	4.87716	5.30038	5.21388	5.36738	4.87931	4.8523	5.17578	5.06154	4.77472	4.81306	4.78308	5.69765	5.60529	5.66647	4.83018	4.70595	4.7662	5.46791	5.32947	5.24542	chr7	45872772	45883732	10961	+	HAVANA	gene	NA	NA
ENSMUSG00000002797.9	protein_coding	Ggct	4.51706	4.65317	4.56202	4.29275	4.47298	4.07999	4.32307	4.42285	4.31366	4.21264	4.48578	4.47353	4.34642	4.34736	4.14164	4.58966	4.51176	4.71239	4.66449	4.49737	4.66729	4.47245	4.73308	4.1922	4.16407	4.46928	4.29218	3.99716	4.00138	4.60259	4.70595	4.68125	4.60308	4.41788	4.7607	chr6	54982580	54992950	10371	-	HAVANA	gene	NA	NA
ENSMUSG00000002803.13	protein_coding	Btbd6	4.60133	4.7583	4.66588	4.34232	4.49083	4.31014	4.41058	4.74453	4.59178	4.16778	4.32039	4.14627	4.08307	4.87081	4.64982	4.83151	4.18551	4.33749	4.12258	5.28685	5.11742	4.22871	4.57842	4.49169	4.48776	4.44611	4.31469	4.60804	4.57643	4.9171	4.84186	4.71827	4.25064	4.22795	4.00058	chr12	112976482	112978930	2449	+	ENSEMBL	gene	NA	NA
ENSMUSG00000002812.4	protein_coding	Flii	7.02231	7.09415	6.94508	6.84693	6.76341	7.42254	7.20541	6.79496	6.96167	6.7563	7.24153	7.48003	7.18753	6.84122	6.86198	6.75648	7.27459	7.28152	7.25082	6.72716	6.69573	7.15892	7.29704	6.84017	6.91198	6.79671	7.44075	7.02876	7.03101	6.77755	6.86912	6.7932	7.20837	7.25231	7.04471	chr11	60714123	60727263	13141	-	HAVANA	gene	NA	NA
ENSMUSG00000002814.15	protein_coding	Top3a	4.74826	4.7557	4.68146	4.76211	4.99471	4.73752	4.81516	5.07584	4.99176	4.81922	4.69736	4.96679	4.59885	4.62673	4.81828	4.73561	4.75343	5.00457	4.88086	4.80407	4.64769	4.74225	4.92232	4.71323	4.87913	4.95708	4.90591	4.38926	4.41326	4.65916	4.62306	4.66238	4.91546	4.77623	4.60486	chr11	60740058	60777365	37308	-	HAVANA	gene	NA	NA
ENSMUSG00000002820.5	protein_coding	Atg4d	4.75566	5.10082	5.02232	4.2861	4.47178	4.4441	4.33087	4.5178	4.46505	4.08465	4.6968	4.74418	4.3622	4.31724	4.2426	4.21802	4.75113	4.43373	4.41583	4.62201	4.68489	4.51585	4.49773	4.4506	4.41897	4.45835	4.53681	4.32049	4.31487	4.31186	4.30208	4.61945	4.67681	4.4861	4.393	chr9	21265299	21274368	9070	+	ENSEMBL	gene	NA	NA
ENSMUSG00000002825.6	protein_coding	Qtrt1	3.53179	3.78892	3.7172	3.18125	3.28806	3.30121	3.11204	3.35756	3.49483	3.29626	3.27277	3.46713	3.20272	3.20176	3.20749	3.07444	3.35632	3.61837	3.69325	3.36914	3.06494	3.24953	3.29288	3.31863	3.46421	3.42878	3.32139	3.00962	3.03071	3.12912	3.16164	3.30358	3.62643	3.57994	3.46078	chr9	21411837	21420277	8441	+	ENSEMBL	gene	NA	NA
ENSMUSG00000002833.10	protein_coding	Hdgfrp2	5.69645	5.59772	5.57762	5.92716	5.61264	6.0987	5.84194	5.66795	5.79427	5.87781	5.77866	6.01581	5.86509	5.65366	5.74387	5.77108	6.04766	6.02117	6.13408	5.48146	5.46481	5.79497	5.87853	5.81117	5.74405	5.928	6.20679	5.77642	5.79725	5.51599	5.27257	5.52693	5.89862	6.00925	5.80911	chr17	56079657	56100596	20940	+	ENSEMBL	gene	NA	NA
ENSMUSG00000002835.8	protein_coding	Chaf1a	4.68316	3.60008	3.92399	6.28879	5.40647	6.53372	5.99595	5.53836	5.89431	6.13378	6.09729	6.50997	6.18775	5.00586	5.33754	5.44907	6.40993	6.51786	6.5199	2.06253	3.0489	6.045	5.99009	5.8626	5.80832	6.10414	6.6464	5.59848	5.42401	4.03478	3.94903	4.08872	6.22368	6.40008	6.22374	chr17	56040416	56068026	27611	+	ENSEMBL	gene	NA	NA
ENSMUSG00000002844.8	protein_coding	Adprh	4.85483	4.72277	4.6533	5.16291	5.06788	5.33318	5.24232	4.9408	5.03099	5.14434	4.96671	5.27653	5.0345	4.88087	4.87107	4.75775	5.11108	5.1765	5.14995	4.68328	4.59897	4.96614	4.80883	5.13182	5.02095	5.13244	5.4117	5.19207	5.24379	4.48232	4.83054	4.64326	5.25096	5.17634	4.97108	chr16	38445399	38452689	7291	-	ENSEMBL	gene	NA	NA
ENSMUSG00000002845.14	protein_coding	Tmem39a	4.24039	4.19999	4.13403	4.51048	4.32165	4.31573	4.06886	3.91102	4.16185	4.29176	4.41895	4.84531	4.35719	4.07166	4.02383	4.10663	4.61385	4.66485	4.81148	4.12025	4.12451	4.67983	4.64843	4.35281	4.28069	4.19778	4.52477	4.01883	3.6957	3.91731	3.86328	3.89484	4.69622	4.77127	4.75888	chr16	38558698	38592162	33465	+	HAVANA	gene	NA	NA
ENSMUSG00000002846.9	protein_coding	Timmdc1	3.78493	3.60743	3.74415	4.24142	3.85473	4.05033	3.68015	3.83474	3.95139	4.04204	4.07129	4.34109	4.15895	3.61115	3.71413	3.56204	4.12254	4.29347	4.24904	3.17145	3.26192	3.99827	3.9306	3.9635	3.97249	4.11987	4.18104	3.66905	3.51504	3.4996	3.48419	3.41301	4.25064	4.39223	4.00889	chr16	38498347	38522663	24317	-	HAVANA	gene	NA	NA
ENSMUSG00000002870.8	protein_coding	Mcm2	6.98579	6.31242	6.34444	8.28183	7.89042	7.79367	7.05849	7.78684	7.9177	8.29832	7.8857	8.22458	7.65261	7.52632	7.6848	7.68061	8.1713	8.26515	8.17253	5.80316	6.23942	7.91948	7.86976	7.99945	8.09157	8.07017	7.9567	6.7515	6.302	6.95545	6.97704	6.98388	8.13441	8.18762	8.04824	chr6	88883474	88898780	15307	-	HAVANA	gene	NA	NA
ENSMUSG00000002871.14	protein_coding	Tpra1	4.56672	4.97291	5.05351	3.77845	4.13753	4.23962	4.40349	4.15705	4.05015	3.63913	3.81561	3.75125	3.93986	4.34736	4.24962	4.20182	3.75349	3.73815	3.79548	4.73718	4.80001	4.00151	3.95367	3.94304	4.04513	3.90726	4.19844	4.39868	4.37435	4.68416	4.50694	4.61081	3.90533	4.06704	3.7157	chr6	88902251	88912238	9988	+	HAVANA	gene	NA	NA
ENSMUSG00000002881.14	protein_coding	Nab1	6.2242	6.23971	6.2712	6.06796	6.09923	6.45762	6.41294	6.22574	6.27574	6.13332	6.51731	6.77662	6.55839	5.82622	5.88451	6.04855	6.44967	6.45684	6.63207	5.54505	5.74457	6.45793	6.25868	5.99531	5.88677	6.09559	6.49776	6.30572	6.19628	5.67659	5.65285	5.88808	6.36898	6.27265	6.50845	chr1	52457294	52500679	43386	-	HAVANA	gene	NA	NA
ENSMUSG00000002885.14	protein_coding	Adgre5	7.97158	8.61701	8.5448	7.13239	7.21432	7.77556	8.17966	7.25248	7.34929	6.61599	6.92448	6.70276	7.36754	7.48902	7.50665	7.47252	6.65573	6.71737	6.76379	8.36872	8.25656	7.10777	7.23201	7.20088	7.2367	7.21739	7.65859	8.23427	8.3646	7.70741	7.91593	7.746	6.77868	6.75888	6.68835	chr8	83723251	83741326	18076	-	HAVANA	gene	NA	NA
ENSMUSG00000002897.5	protein_coding	Il17ra	7.79647	7.75593	7.77848	7.2452	7.679	8.11727	8.24519	7.92599	7.77606	7.22011	7.68672	7.4304	7.84195	8.05871	7.91651	7.9325	7.54174	7.52491	7.45299	8.63375	8.54222	7.55858	7.7871	7.51967	7.40789	7.43816	8.14525	8.41378	8.49707	8.25645	8.23452	8.22223	7.36462	7.47788	7.32915	chr6	120463247	120487559	24313	+	HAVANA	gene	NA	NA
ENSMUSG00000002910.10	protein_coding	Arrdc2	3.32812	3.91088	3.93034	2.71082	2.9352	2.59191	2.75884	2.65676	2.76442	2.08009	2.72198	2.84026	2.67468	2.57946	2.91565	2.97715	2.19305	2.49476	2.70355	3.6327	3.49907	2.54697	2.67826	2.63206	2.29453	2.66838	2.74311	3.17222	3.17354	2.58756	3.14345	2.91448	2.30891	2.49795	2.44862	chr8	70835155	70839720	4566	-	ENSEMBL	gene	NA	NA
ENSMUSG00000002948.19	protein_coding	Map2k7	6.05023	5.84429	5.91601	6.15698	6.12231	6.18903	5.9295	6.27887	6.25308	6.12121	6.09341	6.08029	6.19252	6.32557	6.39051	6.31746	6.22827	6.23596	6.1665	6.54047	6.46636	6.16848	6.38399	6.1979	6.27249	6.06302	6.04376	6.19878	6.13536	6.38213	6.38271	6.30887	6.08436	6.3027	6.03686	chr8	4238740	4247897	9158	+	HAVANA	gene	NA	NA
ENSMUSG00000002949.15	protein_coding	Timm44	5.5948	5.70638	5.60564	5.78251	5.54021	5.58665	5.39318	5.47024	5.64154	5.67637	5.58459	5.70732	5.3898	5.40979	5.52067	5.4651	5.59185	5.7409	5.70767	5.03677	5.01189	5.49611	5.50451	5.64253	5.68985	5.86278	5.66423	5.45841	5.50022	5.1927	5.46791	5.26864	5.66512	5.80572	5.59936	chr8	4259731	4275913	16183	-	HAVANA	gene	NA	NA
ENSMUSG00000002957.11	protein_coding	Ap2a2	6.39501	6.33667	6.30533	6.29787	6.3511	6.74389	6.70168	6.33084	6.36904	6.40057	6.72801	6.89326	6.52686	6.413	6.32792	6.27571	6.59127	6.60438	6.70013	6.27888	6.17684	6.52354	6.52301	6.41445	6.40325	6.30696	6.86635	6.25462	6.33247	6.23006	6.28729	6.40548	6.64047	6.60527	6.50391	chr7	141562173	141633011	70839	+	HAVANA	gene	NA	NA
ENSMUSG00000002963.17	protein_coding	Pnkp	5.13883	5.62649	5.55919	4.53862	4.74496	4.81672	4.96241	4.60813	4.53444	4.41813	4.82293	4.78678	4.41765	4.68242	4.70144	4.70302	4.64162	4.4891	4.52145	4.64067	4.78214	4.69698	4.60538	4.77935	4.69103	4.64745	4.8298	4.8308	4.9092	4.7329	4.77846	4.59763	4.66199	4.7411	4.59937	chr7	44857139	44862992	5854	+	HAVANA	gene	NA	NA
ENSMUSG00000002968.8	protein_coding	Med25	5.11791	5.19853	5.1707	5.16291	5.1967	4.98686	5.16054	5.03386	5.12073	4.95554	5.11298	5.21404	5.00738	5.04415	5.02892	4.83845	5.15061	5.18706	5.07712	5.1131	4.90513	5.03578	5.17221	5.14442	5.08911	4.96729	5.14182	4.89433	4.68376	4.81668	5.1228	4.96411	5.08435	5.18009	5.04572	chr7	44876765	44892712	15948	-	HAVANA	gene	NA	NA
ENSMUSG00000002981.10	protein_coding	Clptm1	6.1717	6.08298	6.04187	6.23058	6.22006	6.41243	6.30859	6.15444	6.26814	6.17358	6.38101	6.64125	6.3374	6.0555	6.19747	6.01729	6.45194	6.6015	6.53846	5.86712	5.84753	6.43833	6.45534	6.18409	6.32362	6.19276	6.50267	6.31321	6.16717	5.991	6.21533	5.94645	6.61693	6.53832	6.40199	chr7	19631571	19665033	33463	-	HAVANA	gene	NA	NA
ENSMUSG00000002983.17	protein_coding	Relb	5.10417	5.42996	5.26881	5.26924	5.35449	4.1198	4.83639	5.13814	5.24626	5.27396	4.77578	4.79673	4.96925	4.78237	5.04299	4.77956	4.39436	4.8536	4.50464	4.58987	4.41251	4.69698	5.00009	5.42376	5.75627	5.12516	4.45737	5.5387	4.28975	4.92552	4.72442	5.08242	4.43759	4.52798	4.36036	chr7	19606217	19629438	23222	-	HAVANA	gene	NA	NA
ENSMUSG00000002984.17	protein_coding	Tomm40	5.53752	5.26683	5.27293	6.51452	6.14691	5.36364	4.66902	5.86225	6.09124	6.26465	5.98774	6.36851	5.43628	5.7055	5.7707	5.61401	6.16536	6.33795	6.2823	4.88213	5.04223	6.12424	6.19879	6.24803	6.36234	6.29113	5.56175	4.48963	4.17368	5.63103	5.51465	5.57145	6.45645	6.37931	6.25768	chr7	19701313	19715438	14126	-	HAVANA	gene	NA	NA
ENSMUSG00000002985.16	protein_coding	Apoe	3.74288	5.76944	6.24366	1.59136	1.60471	0.892489	0.183704	2.03948	1.97996	2.1608	1.294	1.40748	1.66977	1.34983	1.81638	1.01093	1.19345	1.26837	1.42031	2.41353	2.03847	1.32255	1.41862	1.77882	2.54051	1.35794	1.42742	1.13572	1.18022	0.824538	1.64125	1.68024	1.33565	1.39799	0.958385	chr7	19696109	19699188	3080	-	HAVANA	gene	NA	NA
ENSMUSG00000002996.17	protein_coding	Hbp1	6.64276	7.05306	7.0874	5.8696	6.26397	6.0978	6.53804	6.33683	6.2208	5.96092	6.02481	5.68607	6.30864	6.58565	6.47213	6.48573	5.77282	5.61783	5.56906	7.01165	7.0152	5.99565	5.97469	6.15592	6.06657	6.05217	6.01882	6.74351	6.87889	6.79444	6.7748	6.75807	5.5513	5.59702	5.69006	chr12	31926254	31950535	24282	-	HAVANA	gene	NA	NA
ENSMUSG00000002997.15	protein_coding	Prkar2b	3.51519	3.99492	4.52959	2.47855	1.80821	2.97795	2.16147	1.82899	2.31566	2.4976	2.61493	2.96551	2.36867	2.65172	2.99226	2.73084	4.15622	3.58681	3.85352	1.70343	2.16988	4.31201	4.17592	2.60105	2.8853	2.69811	2.86142	1.92547	2.25407	2.11521	2.36096	2.31706	3.45045	3.16105	3.59938	chr12	31958476	32061296	102821	-	HAVANA	gene	NA	NA
ENSMUSG00000003031.14	protein_coding	Cdkn1b	7.40528	7.61193	7.67728	6.50711	6.9652	7.73312	7.79889	7.20498	6.88805	6.36386	7.1945	6.57746	7.35046	7.31681	7.09599	7.32794	6.74479	6.60937	6.7132	8.18607	8.18008	6.94073	7.15333	6.84238	6.60091	6.81661	7.60436	8.04958	8.10369	7.56718	7.53617	7.74629	6.41765	6.46178	6.71187	chr6	134920401	134925513	5113	+	HAVANA	gene	NA	NA
ENSMUSG00000003033.14	protein_coding	Ap1m1	5.9098	5.61792	5.55919	6.24093	6.14315	6.45125	6.33679	6.20842	6.22892	5.99525	6.30679	6.52455	6.21165	6.13748	6.13219	6.0918	6.3817	6.55332	6.43772	5.86142	5.87789	6.24266	6.31543	6.13804	6.16866	6.16465	6.53179	6.24696	6.16337	6.05947	6.02232	6.09694	6.36189	6.46793	6.29216	chr8	72240018	72257385	17368	+	HAVANA	gene	NA	NA
ENSMUSG00000003037.16	protein_coding	Rab8a	7.02973	6.93362	7.0011	6.89055	6.92639	7.5732	7.57727	6.7799	6.90964	6.84801	7.05958	7.23238	7.22	6.9521	7.05788	6.84761	7.04316	7.05557	7.14751	7.00039	6.99112	6.91518	6.95993	6.93023	7.13534	6.96612	7.55524	7.58684	7.59427	6.98794	7.02004	6.95445	7.04644	7.09822	7.08459	chr8	72161200	72183904	22705	+	HAVANA	gene	NA	NA
ENSMUSG00000003038.15	protein_coding	Hmgn2	7.42712	6.67119	6.60592	8.21976	7.61753	8.96578	8.70354	8.13251	8.29564	8.26108	8.70701	8.9077	8.972	7.60364	7.87479	7.79612	8.99513	9.09245	8.97309	6.66183	6.84045	8.59478	8.52407	7.82241	7.82272	8.02782	8.98995	8.67972	8.52422	7.08713	6.91859	7.05799	8.76883	8.69627	8.7671	chr4	133964738	133968650	3913	-	HAVANA	gene	NA	NA
ENSMUSG00000003039.8	protein_coding	Fam32a	5.96669	6.12811	6.0876	5.8363	5.78166	6.03009	6.03101	5.77574	5.84231	5.78856	5.70321	5.73035	6.01214	5.9484	5.8322	5.8522	5.70491	5.67916	5.63783	5.85999	5.89579	5.71034	5.62914	5.63107	5.67133	5.70946	5.98713	6.09593	6.20554	5.93794	5.90577	5.88537	5.64482	5.77875	5.68228	chr8	72219730	72223764	4035	+	ENSEMBL	gene	NA	NA
ENSMUSG00000003062.12	protein_coding	Stard3nl	3.86533	3.93865	3.79372	3.83786	3.87299	3.84108	3.70344	4.06063	3.80714	3.62022	4.15556	4.3866	3.59756	3.81896	3.56605	3.71571	4.02868	4.02397	4.10038	3.79097	3.78187	4.0772	3.89132	3.9097	3.92516	3.74585	4.03761	3.40189	3.54454	3.48829	3.79502	3.77111	4.00881	4.20603	4.15091	chr13	19357676	19395795	38120	-	HAVANA	gene	NA	NA
ENSMUSG00000003068.15	protein_coding	Stk11	6.0605	5.95796	5.98601	6.01642	6.08255	6.32745	6.19108	6.01002	6.06033	6.1361	6.25941	6.29824	6.13018	5.9635	5.92696	5.91656	6.34405	6.36223	6.33904	6.24323	6.02614	6.18983	6.2739	6.14778	6.02947	6.00129	6.48944	6.02173	6.12183	6.04599	6.03107	6.13672	6.26139	6.23149	6.15308	chr10	80115803	80130682	14880	+	HAVANA	gene	NA	NA
ENSMUSG00000003072.15	protein_coding	Atp5d	6.12927	5.63996	5.78647	6.72044	6.61263	6.86039	6.58582	6.46509	6.58102	6.61605	6.86264	7.00622	6.60887	6.23773	6.35001	6.27692	6.83767	6.96508	6.89276	5.55215	5.67713	6.67445	6.75525	6.51729	6.66498	6.63514	6.90043	6.38447	6.36041	6.01089	6.11623	6.12937	6.95281	6.82504	6.81505	chr10	80138632	80145818	7187	+	HAVANA	gene	NA	NA
ENSMUSG00000003099.11	protein_coding	Ppp5c	5.82987	5.39861	5.48214	6.76273	6.33979	6.02056	5.81546	5.96206	6.27749	6.65081	6.48021	6.73738	6.03581	6.07535	6.10178	6.12056	6.68451	6.75342	6.76855	5.1992	5.31669	6.48482	6.46273	6.44856	6.41811	6.49892	6.05078	5.55704	5.56213	5.76595	5.84798	5.75783	6.712	6.73607	6.61442	chr7	17004640	17027924	23285	-	HAVANA	gene	NA	NA
ENSMUSG00000003119.14	protein_coding	Cdk12	7.41657	7.19795	7.29964	7.57072	7.6932	7.44265	7.41127	7.62795	7.61231	7.66665	7.53348	7.54877	7.60111	7.52191	7.43097	7.5125	7.60306	7.65753	7.51634	7.59148	7.64549	7.62287	7.71861	7.57057	7.58355	7.57929	7.42236	7.60051	7.59427	7.66963	7.67796	7.61994	7.5907	7.64874	7.61238	chr11	98203059	98278504	75446	+	HAVANA	gene	NA	NA
ENSMUSG00000003123.15	protein_coding	Lipe	3.75443	4.11233	4.0077	3.51641	3.5888	3.20455	3.38753	3.66037	3.59851	3.61703	3.31462	2.92986	3.5351	3.68716	3.46321	3.55566	3.24421	3.20613	3.04195	4.0795	4.03046	3.29118	3.11236	3.76485	3.5674	3.59759	3.27157	3.10461	3.35717	3.7988	3.71956	3.62032	3.13558	3.4553	2.90582	chr7	25379527	25398710	19184	-	HAVANA	gene	NA	NA
ENSMUSG00000003131.6	protein_coding	Pafah1b2	6.45089	6.31897	6.31729	6.73321	6.58935	6.79204	6.42349	6.38643	6.56345	6.76708	6.78143	7.06009	6.60604	6.33055	6.40786	6.43563	6.86225	6.83677	6.94174	6.17802	6.18608	6.88654	6.72708	6.54606	6.59789	6.59752	6.77268	6.36937	6.29333	6.24059	6.18007	6.36355	6.7774	6.61517	6.82803	chr9	45965311	45984871	19561	-	ENSEMBL	gene	NA	NA
ENSMUSG00000003134.10	protein_coding	Tbc1d8	3.94523	4.97343	4.8198	3.21587	3.2675	1.79078	2.41161	3.51802	3.34423	3.02182	2.79344	3.36028	2.83586	3.18408	3.25587	3.21548	2.8509	2.91873	2.54999	3.31954	3.54815	3.0377	3.12617	3.34394	2.87258	3.02078	1.87677	1.96658	1.48251	3.59253	3.68992	3.62838	3.41554	3.08992	3.25791	chr1	39371492	39478755	107264	-	HAVANA	gene	NA	NA
ENSMUSG00000003135.15	protein_coding	Cnot11	5.27737	5.26958	5.10408	5.43713	5.28118	5.53805	5.32349	5.36477	5.52175	5.47014	5.48497	5.7376	5.4171	5.13098	5.24784	5.06445	5.52324	5.57384	5.52569	5.05935	4.97193	5.41091	5.37664	5.45154	5.49616	5.4357	5.48016	5.37338	5.19438	5.11761	5.07563	5.26448	5.38989	5.45867	5.57437	chr1	39534992	39546889	11898	+	HAVANA	gene	NA	NA
ENSMUSG00000003153.10	protein_coding	Slc2a3	5.84274	6.08135	6.14095	5.19592	5.02361	6.87315	5.99371	5.0074	4.93677	5.01283	5.89354	6.21595	5.61192	5.45929	5.38991	5.4425	5.65211	5.53538	5.88788	5.55038	5.55171	5.53242	5.45955	5.17105	5.20461	5.2904	6.29516	6.09882	6.23118	5.36028	5.19963	5.18736	5.69364	5.65209	5.76806	chr6	122727809	122801640	73832	-	HAVANA	gene	NA	NA
ENSMUSG00000003154.15	protein_coding	Foxj2	5.30426	5.13517	5.19359	5.08465	5.40557	4.97686	5.43155	5.50126	5.56499	5.1191	5.45308	5.20193	5.31959	5.73739	5.70471	5.71923	5.17621	5.04966	5.06553	6.08562	6.01736	5.40451	5.53651	5.42062	5.54004	5.31767	5.05232	5.50549	5.51026	5.94801	5.89156	5.92537	5.08865	5.18757	5.26967	chr6	122819914	122845366	25453	+	HAVANA	gene	NA	NA
ENSMUSG00000003161.15	protein_coding	Sri	6.84575	6.85435	6.83832	6.63509	6.68419	7.00704	7.04145	6.81893	6.73529	6.72568	6.86557	6.94669	7.08631	7.10471	7.11086	6.93331	6.76737	6.72107	6.77607	6.90735	6.80717	6.64002	6.61579	6.78146	6.74416	6.67555	6.98758	7.31112	7.3162	6.8957	6.86774	7.00276	6.4861	6.48926	6.55746	chr5	8046078	8069379	23302	+	HAVANA	gene	NA	NA
ENSMUSG00000003166.19	protein_coding	Dgcr2	6.36896	6.46607	6.48783	6.19226	6.36218	6.03799	5.93569	6.28265	6.27559	6.28355	6.23676	6.24966	6.13594	6.30431	6.26145	6.2187	6.22549	6.38859	6.2514	6.41391	6.36122	6.22715	6.30817	6.46744	6.35916	6.24523	6.14659	6.10005	6.00174	6.40808	6.43447	6.37447	6.2821	6.36306	6.21616	chr16	17839482	17894145	54664	-	HAVANA	gene	NA	NA
ENSMUSG00000003184.15	protein_coding	Irf3	6.22818	6.68312	6.67702	5.78534	5.89099	5.48777	5.45624	5.83524	5.81929	5.46088	5.824	5.65358	5.43477	6.01954	5.86992	5.96115	5.68709	5.63575	5.49806	6.24192	6.258	5.73781	5.87148	5.93754	5.77596	5.93218	5.57779	5.42038	5.53003	6.0841	6.18675	5.99754	5.65646	5.7563	5.55746	chr7	44997648	45002848	5201	+	HAVANA	gene	NA	NA
ENSMUSG00000003190.12	protein_coding	Bcl2l12	3.61574	3.90554	3.66197	3.24689	3.44753	3.56225	3.49354	3.37871	3.58975	3.19629	3.7018	3.5169	3.46538	3.35723	3.53109	3.42821	3.59612	3.57633	3.39662	3.30332	3.25815	3.57457	3.57045	3.30105	3.5356	3.34883	3.50627	3.14091	3.24998	3.39882	3.39554	2.98888	3.59461	3.98722	3.68832	chr7	44991222	44998712	7491	-	HAVANA	gene	NA	NA
ENSMUSG00000003198.9	protein_coding	Zfp959	3.99701	4.12875	4.13099	3.86404	3.81995	3.84325	3.83306	3.97013	3.89176	3.86528	3.43442	3.67056	3.98266	3.98055	4.18642	4.20053	3.42277	3.62385	3.50372	4.20621	4.35422	3.72745	3.41153	3.74778	3.65158	3.81653	3.62971	4.18001	4.1834	4.36248	4.47356	4.36281	3.3567	3.63106	3.46465	chr17	55892120	55898928	6809	+	HAVANA	gene	NA	NA
ENSMUSG00000003199.16	protein_coding	Mpnd	5.07354	5.34595	5.24804	4.54309	4.64224	5.38013	5.34215	4.66636	4.6843	4.58096	5.21076	5.18554	4.91375	4.69102	4.5293	4.65403	5.03266	5.01478	5.0755	4.78312	4.83508	4.76913	4.69708	4.8113	4.67966	4.58782	5.33669	4.84695	4.99506	4.4477	4.60324	4.78377	4.79954	5.07519	5.00473	chr17	56005711	56016790	11080	+	HAVANA	gene	NA	NA
ENSMUSG00000003200.9	protein_coding	Sh3gl1	5.78892	6.0892	6.04801	5.19592	5.38025	5.65967	5.6515	5.4787	5.46662	5.27245	5.54348	5.28079	5.25366	5.51039	5.48723	5.57585	5.47957	5.58872	5.4871	5.7822	5.80268	5.43628	5.59409	5.37113	5.30047	5.29851	5.74104	5.57376	5.61315	5.57866	5.69717	5.69421	5.55442	5.58857	5.3571	chr17	56016753	56036637	19885	-	ENSEMBL	gene	NA	NA
ENSMUSG00000003226.6	protein_coding	Ranbp2	8.93877	8.81299	8.85827	9.1663	9.15858	9.03126	8.87205	8.93748	8.9927	9.11592	9.01523	9.26103	8.89833	8.89673	8.94556	9.01318	9.19906	9.22979	9.27497	8.71342	8.80422	9.14555	9.09295	9.01679	9.04281	9.15153	9.04553	8.74873	8.6697	9.00908	8.99538	8.93999	9.28539	9.28666	9.38551	chr10	58446852	58494155	47304	+	ENSEMBL	gene	NA	NA
ENSMUSG00000003233.11	protein_coding	Dvl3	3.65985	3.18834	3.29141	3.83786	4.05995	3.90876	3.86708	3.93991	4.17546	3.97666	3.90597	3.86534	3.78084	4.32911	4.24267	4.23024	3.8157	3.84112	3.84972	4.57602	4.49941	4.024	4.26468	4.13923	3.95374	4.07526	3.92088	3.99303	4.02669	4.48232	4.49265	4.58432	3.9247	4.13821	3.83274	chr16	20516982	20532520	15539	+	HAVANA	gene	NA	NA
ENSMUSG00000003234.15	protein_coding	Abcf3	5.58777	5.90208	5.72693	5.25977	5.59074	5.1841	4.9958	5.42723	5.38896	5.26487	5.27245	5.25648	4.91922	5.40632	5.45301	5.3645	5.3351	5.32464	5.32014	5.73311	5.60203	5.35879	5.52903	5.49153	5.57648	5.41646	5.15614	5.09499	5.11989	5.4736	5.57017	5.4738	5.41409	5.53097	5.24894	chr16	20548577	20561379	12803	+	HAVANA	gene	NA	NA
ENSMUSG00000003235.12	protein_coding	Eif2b5	5.9693	5.98474	5.9244	6.24437	6.0797	6.08048	5.71304	5.89238	6.10967	6.10979	6.2083	6.45274	5.89036	5.72098	5.84374	5.74053	6.20613	6.42531	6.30328	5.30586	5.33955	6.0797	6.05243	6.13984	6.13889	6.17877	6.17989	5.5985	5.38913	5.72075	5.70339	5.62766	6.41594	6.31422	6.28361	chr16	20498817	20509955	11139	+	HAVANA	gene	NA	NA
ENSMUSG00000003269.16	protein_coding	Cyth2	5.16847	5.39146	5.41964	4.418	4.74164	5.21217	5.22601	5.09704	4.85827	4.51888	5.42067	5.14279	5.8829	4.88777	4.86821	4.90324	4.79055	4.8131	4.7972	5.37407	5.18871	4.7684	5.01226	4.50291	4.60831	4.54121	5.23177	5.14923	5.25288	4.91597	4.99916	4.92643	4.62041	4.56289	4.57157	chr7	45806637	45814581	7945	-	HAVANA	gene	NA	NA
ENSMUSG00000003299.9	protein_coding	Mrpl4	4.46266	4.38333	4.30079	4.72522	4.56572	4.91668	4.76069	4.56115	4.58426	4.57115	4.87688	5.05067	4.62584	4.44549	4.44095	4.2054	4.84577	4.8836	4.92664	3.74219	3.76638	4.74031	4.72193	4.48604	4.57928	4.69982	5.04896	4.56127	4.426	4.03081	3.93905	4.29679	4.94422	4.89057	4.80435	chr9	21002737	21008835	6099	+	ENSEMBL	gene	NA	NA
ENSMUSG00000003308.14	protein_coding	Keap1	5.90779	5.74098	5.80933	5.8837	5.7247	6.313	6.13462	6.11701	5.99168	6.00848	6.27952	6.26713	6.35818	5.83536	5.76947	5.79392	6.36801	6.32325	6.37055	5.59168	5.70972	6.17962	6.31168	5.89564	5.94388	5.81437	6.23362	6.04871	6.03357	5.65742	5.73279	5.92421	6.23329	6.2784	6.16654	chr9	21229730	21239332	9603	-	HAVANA	gene	NA	NA
ENSMUSG00000003316.14	protein_coding	Glg1	7.11148	6.84764	6.88749	7.19034	7.31077	7.67358	7.50951	7.34362	7.32252	7.19638	7.32245	7.34584	7.28318	7.38905	7.38987	7.31265	7.25573	7.17524	7.21842	7.50639	7.45571	7.17372	7.24734	7.24715	7.31959	7.23304	7.60827	7.53262	7.57223	7.47349	7.51334	7.5291	7.27782	7.23618	7.20708	chr8	111154421	111259216	104796	-	HAVANA	gene	NA	NA
ENSMUSG00000003344.14	protein_coding	Btbd2	4.30872	4.47321	4.3484	3.94982	3.89103	4.45582	4.65116	4.17202	4.15278	4.01335	4.06258	3.77963	4.35181	4.44549	4.56318	4.38681	4.19274	4.01722	4.08108	4.6703	4.52418	3.97207	4.01709	4.16772	4.10157	3.96138	4.24941	4.55005	4.68376	4.34484	4.108	4.42176	3.80434	4.15356	3.7157	chr10	80642617	80657071	14455	-	HAVANA	gene	NA	NA
ENSMUSG00000003345.15	protein_coding	Csnk1g2	6.74817	6.87289	6.81026	6.37859	6.34797	6.90042	6.87707	6.54142	6.59277	6.29997	6.72187	6.76552	6.78383	6.75909	6.73087	6.58824	6.69155	6.85155	6.69691	6.83359	6.79704	6.5388	6.74261	6.37716	6.264	6.296	6.96488	6.76492	6.67319	6.75649	6.66911	6.8706	6.63909	6.69994	6.53748	chr10	80622780	80640771	17992	+	ENSEMBL	gene	NA	NA
ENSMUSG00000003346.14	protein_coding	Abhd17a	4.85233	5.02571	5.13721	4.61915	4.65812	4.8771	4.60862	4.2587	4.4727	4.35092	4.8434	4.9999	4.5433	4.55003	4.62597	4.50203	4.99179	4.89469	4.93024	3.93358	4.14342	4.69498	4.6718	4.69866	4.48123	4.50335	5.02965	4.64807	4.55919	4.26756	4.4265	4.42176	5.0092	4.97075	4.75577	chr10	80583654	80590341	6688	-	HAVANA	gene	NA	NA
ENSMUSG00000003348.9	protein_coding	Mob3a	7.09601	7.35011	7.30315	6.85211	6.81755	7.0237	6.98404	6.48368	6.65348	6.45916	6.73514	7.1036	6.67633	6.82392	6.81912	6.74769	6.84815	6.97885	6.89856	6.88753	6.7702	6.74436	6.76456	7.03179	6.96345	6.83121	7.10962	7.13689	7.10083	6.95902	7.07401	6.90884	6.89423	6.83366	6.77742	chr10	80685256	80701820	16565	-	ENSEMBL	gene	NA	NA
ENSMUSG00000003360.14	protein_coding	Ddx23	6.72715	6.63626	6.58079	6.95444	6.78648	6.83398	6.59675	6.91813	6.94564	6.89743	6.86013	7.00193	6.75253	6.8438	6.79881	6.82681	6.90965	7.05598	6.92514	6.79151	6.79322	6.8773	6.91068	6.87838	6.83083	6.94148	6.94234	6.73858	6.68715	6.67901	6.69119	6.72965	6.88395	6.94897	6.83272	chr15	98645134	98662889	17756	-	HAVANA	gene	NA	NA
ENSMUSG00000003363.15	protein_coding	Pld3	5.90256	6.01387	5.91587	5.36197	5.78889	5.88326	6.40408	5.78063	5.91749	5.35623	5.98927	5.94599	5.66059	6.04883	6.06678	5.88274	5.74727	5.59213	5.66509	5.83258	5.78996	5.75327	5.68649	5.45443	5.36751	5.39544	5.7797	6.21533	6.53815	6.18388	6.44429	6.18332	5.80761	5.79597	5.56875	chr7	27532000	27553218	21219	-	HAVANA	gene	NA	NA
ENSMUSG00000003380.11	protein_coding	Rabac1	5.27822	6.03443	5.87175	4.17961	4.73001	4.47549	4.51957	4.82816	4.73947	4.31022	4.51797	4.13062	3.89248	4.95414	4.78516	4.77232	4.22131	4.24518	4.15371	5.69677	5.59766	4.39076	4.68565	4.59758	4.37251	4.43143	4.62373	4.33142	4.50017	5.23392	5.45691	5.21353	4.27349	4.32604	4.12054	chr7	24969752	24972754	3003	-	HAVANA	gene	NA	NA
ENSMUSG00000003382.18	protein_coding	Etv3	6.98842	6.94138	6.92657	6.78648	7.05192	6.48905	6.47515	7.02421	6.87503	6.75251	7.07589	7.27571	6.72991	7.3288	7.17435	7.25329	7.19626	7.10813	7.10235	7.44675	7.43667	7.17444	7.11419	7.0145	6.96326	6.88713	6.34444	6.75334	6.79175	7.45036	7.44352	7.39644	7.13436	7.1792	7.14242	chr3	87525407	87540156	14750	+	HAVANA	gene	NA	NA
ENSMUSG00000003402.13	protein_coding	Prkcsh	5.78906	5.42258	5.45158	6.30681	6.17845	6.54262	6.36445	6.06266	6.15349	6.31694	6.24017	6.41318	6.37501	5.98499	6.0157	5.93549	6.15244	6.29534	6.31503	5.40321	5.45356	6.03769	6.03452	6.11445	6.09036	6.16553	6.56638	6.35976	6.32514	5.79148	5.82819	5.89618	6.3813	6.28664	6.12627	chr9	22003035	22014219	11185	+	ENSEMBL	gene	NA	NA
ENSMUSG00000003418.11	protein_coding	St8sia6	5.37452	5.81321	6.07523	5.06671	5.70982	2.57118	4.22186	5.31844	4.93966	4.94609	3.89293	2.95133	4.09594	5.97905	5.49739	5.76857	3.56017	2.70258	2.27566	7.55434	7.32163	4.03985	4.72179	5.80433	5.73584	5.55151	3.5822	5.17938	5.18127	6.52978	6.6041	6.5884	3.07026	3.31914	3.47285	chr2	13651021	13794064	143044	-	HAVANA	gene	NA	NA
ENSMUSG00000003420.8	protein_coding	Fcgrt	3.46588	4.11957	4.13376	3.08031	2.34157	4.07999	3.46535	2.9486	2.20242	1.1904	3.40718	3.22333	1.65237	2.46379	2.80673	2.76037	2.92407	3.02545	3.0129	3.40092	2.88538	2.69846	3.59628	2.12234	1.73782	2.54295	3.19535	3.56135	4.05568	2.47746	2.72124	2.21715	2.44932	2.76105	2.7558	chr7	45092990	45103851	10862	-	HAVANA	gene	NA	NA
ENSMUSG00000003421.13	protein_coding	Nosip	5.07209	5.20236	5.14622	4.82952	4.74496	5.27025	5.63039	4.91256	5.0839	4.73387	4.9495	5.01361	5.20825	4.68242	4.73155	4.66968	4.95186	4.97875	4.95872	5.00352	4.94237	4.85764	5.07563	4.89463	4.78682	4.8964	5.42507	5.3829	5.39562	4.53274	5.0169	4.69988	5.10573	4.80568	4.86515	chr7	45062429	45078210	15782	+	HAVANA	gene	NA	NA
ENSMUSG00000003423.15	protein_coding	Pih1d1	4.06696	4.11965	4.11979	3.99909	3.73004	4.46445	4.47594	4.0306	4.20381	4.04948	4.30397	4.51679	4.50136	3.61862	3.53389	3.59663	4.34955	4.39772	4.42489	2.88279	3.232	4.10241	4.17807	3.88845	3.76717	3.86377	4.61121	4.2345	4.12806	3.53576	3.47186	3.61012	4.34714	4.24918	4.15534	chr7	45154303	45160065	5763	+	HAVANA	gene	NA	NA
ENSMUSG00000003429.11	protein_coding	Rps11	9.35473	9.37543	9.40741	9.34043	9.28362	9.375	9.28922	9.48319	9.5509	9.36579	9.39897	9.49702	9.30451	9.31896	9.45939	9.42726	9.27883	9.36505	9.32065	8.9411	9.20781	9.25786	9.32655	9.25511	9.19067	9.29363	9.38214	9.26022	9.23885	9.21409	9.33101	9.25097	9.3751	9.37879	9.21438	chr7	45122379	45124439	2061	-	HAVANA	gene	NA	NA
ENSMUSG00000003435.9	protein_coding	Supt5	7.38164	7.34283	7.29328	7.37551	7.23828	7.6215	7.41417	7.3721	7.39733	7.32573	7.50085	7.6876	7.53961	7.36145	7.36343	7.32855	7.61272	7.64675	7.63276	7.31535	7.27045	7.4865	7.64481	7.40839	7.37256	7.42711	7.6905	7.47783	7.42774	7.23924	7.24004	7.32823	7.51521	7.5376	7.44748	chr7	28314891	28338746	23856	-	HAVANA	gene	NA	NA
ENSMUSG00000003437.14	protein_coding	Paf1	5.64549	5.70143	5.59745	5.97343	5.76464	5.68039	5.34586	5.49068	5.64244	5.797	5.41147	5.64149	5.37529	5.4826	5.67195	5.72813	5.6508	5.6258	5.7202	5.60426	5.49645	5.68838	5.76792	5.72991	5.82364	5.97125	5.72792	5.408	5.39885	5.65904	5.74921	5.54077	5.66224	5.6193	5.67968	chr7	28392951	28399388	6438	+	HAVANA	gene	NA	NA
ENSMUSG00000003438.17	protein_coding	Timm50	4.4348	4.17126	4.30683	5.19308	4.56572	4.80345	4.27724	4.7365	4.8903	5.09385	4.85353	5.2507	4.64136	4.42157	4.50917	4.45463	5.06651	5.205	5.11083	3.21679	3.31257	4.90168	4.96646	5.0132	5.02993	5.01334	4.94972	3.88101	3.53869	3.8304	3.88534	4.20414	5.20019	5.27788	4.88336	chr7	28305516	28312072	6557	-	HAVANA	gene	NA	NA
ENSMUSG00000003458.12	protein_coding	Ncstn	5.91757	5.85547	5.8504	5.78891	5.81037	6.05737	6.06737	6.05938	5.98953	5.84364	6.0149	6.17449	6.11235	6.02393	5.93797	5.89925	5.921	6.06634	6.0174	6.07907	6.05675	5.97624	5.9976	5.92402	5.87156	5.96555	6.10068	6.09496	6.12326	5.87058	5.88799	5.9824	5.95389	5.92007	5.84206	chr1	172066013	172082795	16783	-	HAVANA	gene	NA	NA
ENSMUSG00000003464.13	protein_coding	Pex19	5.0806	5.28046	5.18279	4.96394	4.70475	5.05191	4.66902	4.90542	4.89486	4.96681	5.00204	5.14093	4.83498	4.7716	5.00241	4.93875	5.00623	5.04164	5.10765	4.81	4.78727	5.08855	4.90861	4.98745	5.25716	4.94267	5.09428	4.72496	4.84661	4.89586	4.73661	4.6937	5.04947	4.96205	4.95826	chr1	172126755	172136493	9739	+	HAVANA	gene	NA	NA
ENSMUSG00000003500.13	protein_coding	Impdh1	5.79547	5.4478	5.38371	6.39104	6.02359	6.49318	5.60278	5.92278	6.1655	6.25319	6.39956	6.81972	5.99413	5.96976	6.11991	6.01525	6.60883	6.60206	6.64582	5.72057	5.77714	6.46558	6.46072	6.25053	6.41297	6.29762	6.45714	5.73364	5.59211	5.79607	5.76118	5.76669	6.40564	6.41637	6.26464	chr6	29200434	29216364	15931	-	HAVANA	gene	NA	NA
ENSMUSG00000003527.8	protein_coding	Dgcr14	4.52556	4.57414	4.49662	4.38527	4.44884	4.54359	4.4729	4.45257	4.66306	4.48496	4.6439	4.68116	4.65452	4.62374	4.6681	4.36454	4.52615	4.53708	4.62504	4.41027	4.39918	4.45601	4.58336	4.54967	4.50074	4.54484	4.60036	4.46891	4.49715	4.4182	4.434	4.39151	4.56036	4.53386	4.37973	chr16	17900711	17911348	10638	-	ENSEMBL	gene	NA	NA
ENSMUSG00000003528.14	protein_coding	Slc25a1	4.2821	4.17516	4.28864	4.82403	4.19672	4.89598	4.34545	3.96419	4.23186	4.58827	4.26583	4.76059	4.29409	4.09862	4.29401	4.35811	4.47368	4.82876	5.04261	3.4243	3.29108	4.2036	4.06024	4.55237	4.58538	4.59837	5.00811	4.2047	3.82022	3.97518	4.00096	4.1328	4.48405	4.43683	4.39249	chr16	17925211	17928219	3009	-	HAVANA	gene	NA	NA
ENSMUSG00000003534.17	protein_coding	Ddr1	3.48203	3.35921	3.41208	3.42352	4.44884	2.74787	3.64449	4.19271	4.32723	3.11233	2.91486	2.64257	2.86038	4.67683	4.49461	4.48022	3.40694	3.07829	2.71194	4.78913	4.41642	2.27428	2.8438	3.3946	3.43747	3.31187	2.99486	2.64828	2.97978	4.7136	4.8531	4.89034	3.42347	3.33269	3.0417	chr17	35681567	35704621	23055	-	HAVANA	gene	NA	NA
ENSMUSG00000003545.3	protein_coding	Fosb	3.38543	5.56762	5.45249	0.716471	1.31527	1.97128	0.183704	3.13734	3.19276	1.88801	1.64439	1.74007	2.3144	1.29071	2.10409	0.721611	1.38238	0.428378	0.00663108	1.67772	0.687706	1.04944	0.858456	1.07965	2.50232	0.5892	1.49656	0.30626	-0.0844141	1.45554	1.92294	1.21141	0.00633195	1.39799	0.151131	chr7	19302696	19310051	7356	-	HAVANA	gene	NA	NA
ENSMUSG00000003549.9	protein_coding	Ercc1	3.94885	3.91788	3.84993	4.065	4.11469	4.11547	3.85673	4.10656	4.15016	3.92133	3.88637	4.15867	3.84507	3.98237	4.11055	3.89952	3.90646	4.18622	4.06145	3.84972	3.72957	4.05075	4.12426	4.03201	3.87831	4.26739	4.15967	3.8355	3.73458	4.03859	3.88534	4.02858	4.11384	4.34622	4.00058	chr7	19344778	19356524	11747	+	HAVANA	gene	NA	NA
ENSMUSG00000003575.13	protein_coding	Crtc1	4.25715	3.68607	3.83608	4.72128	4.68421	4.39518	4.6808	4.89643	4.92194	4.8316	4.64779	4.37867	4.49044	5.08387	5.11709	4.90828	4.85946	4.64611	4.64709	5.07421	5.04651	4.58908	4.70843	4.84917	5.0998	4.66762	4.52237	4.51583	4.44177	4.94219	5.09468	4.92242	4.45769	4.77623	4.48481	chr8	70382355	70439579	57225	-	HAVANA	gene	NA	NA
ENSMUSG00000003581.14	protein_coding	Rnf215	3.63568	4.15555	4.06942	3.11675	3.1895	2.99362	3.38119	3.16153	3.28835	3.15236	3.09638	2.97255	3.43411	3.2335	3.164	3.06657	2.89776	2.92805	2.85518	3.37715	3.38198	3.0759	2.99229	3.51436	3.51625	3.39288	2.97884	3.29162	3.50306	3.08475	3.31576	3.23711	2.88485	2.93101	2.6745	chr11	4135202	4141172	5971	+	HAVANA	gene	NA	NA
ENSMUSG00000003604.14	protein_coding	Aven	4.97972	4.89446	4.76815	5.49699	5.30481	5.03845	4.59598	5.19926	5.17408	5.51804	4.96795	5.07041	4.75025	5.19447	5.57775	5.41152	5.07021	5.05295	5.06877	5.11489	5.19238	4.94084	5.0237	5.41632	5.52796	5.49439	4.98401	4.71675	4.57774	5.18211	5.23857	5.1288	5.08004	5.10692	4.88322	chr2	112492964	112634573	141610	+	HAVANA	gene	NA	NA
ENSMUSG00000003623.4	protein_coding	Crot	5.6474	5.84058	5.95487	4.71751	4.90438	6.09435	6.10528	5.09645	5.02556	4.81316	5.59412	5.79351	5.78959	5.37832	5.21109	5.38229	5.28546	5.19621	5.61358	5.54724	5.62842	5.51459	5.32314	4.75155	4.78687	4.82886	5.83425	6.22171	6.35807	5.36338	5.39292	5.42984	5.15599	5.31262	5.25594	chr5	8966033	8997324	31292	-	HAVANA	gene	NA	NA
ENSMUSG00000003644.17	protein_coding	Rps6ka1	7.12893	7.28145	7.16238	6.85998	6.70854	7.5013	7.4608	6.73827	6.94673	6.63088	7.39988	7.59227	7.48133	6.80669	6.74139	6.75036	7.25125	7.18015	7.36655	6.53201	6.56379	7.28996	7.12947	6.74351	6.73593	6.75489	7.54542	7.44366	7.47902	6.54182	6.61899	6.59514	7.33325	7.23527	7.19164	chr4	133847290	133887797	40508	-	HAVANA	gene	NA	NA
ENSMUSG00000003660.10	protein_coding	Snrnp200	8.18308	8.04095	7.97613	8.47066	8.36338	8.454	8.25656	8.33608	8.37027	8.38206	8.46608	8.62427	8.34668	8.18634	8.28549	8.23302	8.4523	8.57857	8.50259	8.06144	8.08468	8.36319	8.38376	8.4011	8.52962	8.3989	8.51204	8.17797	8.11234	8.14922	8.29138	8.20874	8.49676	8.54926	8.41534	chr2	127208386	127240451	32066	+	HAVANA	gene	NA	NA
ENSMUSG00000003662.10	protein_coding	Ciao1	5.04879	5.31447	5.27087	4.68534	4.84549	4.94918	4.97681	4.64506	4.6577	4.76862	4.85856	4.87584	4.80578	4.60566	4.65768	4.72566	4.73621	4.94536	4.88086	4.65721	4.76925	4.87895	4.83598	4.72766	4.82084	4.67262	5.05088	4.86518	4.95826	4.6792	4.68724	4.81259	4.92991	4.93122	4.86056	chr2	127240938	127247816	6879	-	HAVANA	gene	NA	NA
ENSMUSG00000003680.15	protein_coding	Taf6l	4.89869	5.18312	4.9621	4.73502	4.84549	4.89807	4.79904	4.65788	4.80559	4.63139	4.75972	4.7687	4.44822	4.81945	4.76832	4.60059	4.7656	4.75966	4.79461	4.37471	4.46783	4.69498	4.66948	4.80904	4.93515	4.66009	4.95587	4.80506	4.50618	4.61304	4.86424	4.50885	4.84093	4.75123	4.87883	chr19	8772522	8786417	13896	-	HAVANA	gene	NA	NA
ENSMUSG00000003721.14	protein_coding	Insig2	3.86249	3.89678	3.72924	3.5399	4.02771	4.31327	4.02331	3.79276	3.56904	3.55204	3.84974	3.71393	3.88132	4.26912	3.84842	4.11683	3.87983	3.67951	3.80728	4.18698	3.96944	3.87291	3.7666	3.86255	3.71302	3.91993	4.13118	4.2154	4.38744	4.06927	3.95998	3.93733	3.61455	3.77119	3.94099	chr1	121304353	121332589	28237	-	HAVANA	gene	NA	NA
ENSMUSG00000003731.13	protein_coding	Kpna6	6.08412	5.97638	5.95804	6.36224	6.1031	6.22354	6.04703	5.90587	6.09719	6.1905	6.38043	6.5647	6.02825	5.99429	6.05194	6.01423	6.55864	6.49681	6.58431	5.70793	5.75899	6.49979	6.37075	6.29802	6.30525	6.27067	6.28705	5.97101	6.10118	5.86984	5.76714	5.96711	6.52787	6.56583	6.5617	chr4	129643980	129672767	28788	-	HAVANA	gene	NA	NA
ENSMUSG00000003746.15	protein_coding	Man1a	7.64172	7.72899	7.67903	7.66344	7.95506	7.41528	7.67697	7.71406	7.66869	7.93274	7.30502	7.08548	7.53502	7.58248	7.6963	7.74698	7.31574	7.35497	7.27402	7.35746	7.55822	7.51644	7.25394	7.77015	7.79447	7.75781	7.42421	8.01555	7.99567	7.69568	7.57316	7.70693	7.37699	7.38258	7.44015	chr10	53904788	54075796	171009	-	HAVANA	gene	NA	NA
ENSMUSG00000003752.9	protein_coding	Itpkc	3.33318	3.71863	3.48336	3.00169	3.58038	2.64159	2.77454	3.10314	3.3076	3.03187	2.96336	2.93916	2.52127	3.46351	3.20835	3.1573	2.70135	2.63338	2.71278	3.76794	3.43905	2.81895	2.97451	3.34388	3.19987	3.01953	2.16343	2.87466	2.84871	3.46355	3.92058	3.50768	2.81346	3.2983	2.89653	chr7	27207172	27228661	21490	-	HAVANA	gene	NA	NA
ENSMUSG00000003762.13	protein_coding	Adck4	3.61532	3.96782	3.94301	3.07458	3.23342	3.21114	3.61581	3.27983	3.29131	3.24855	3.50473	3.19164	4.15562	3.23452	3.07959	2.98551	3.02685	2.88798	2.96274	3.66374	3.52422	3.03751	3.12183	3.59262	3.09222	3.16407	3.30774	3.47007	3.49547	3.46932	3.50827	3.21897	3.16357	3.12818	2.86591	chr7	27233023	27257950	24928	+	HAVANA	gene	NA	NA
ENSMUSG00000003778.14	protein_coding	Brd8	7.03468	7.08793	7.07251	6.70954	6.51135	7.53322	7.38989	7.08478	7.04136	6.56692	7.14176	7.10763	7.32427	6.84444	6.60845	6.81572	7.17998	7.13293	7.17242	6.91494	6.94025	7.06561	7.09011	6.70151	6.48165	6.79957	7.51727	7.40134	7.37938	6.72672	6.77332	6.73718	6.92181	7.03021	7.00681	chr18	34598615	34624601	25987	-	HAVANA	gene	NA	NA
ENSMUSG00000003779.15	protein_coding	Kif20a	5.1163	4.30928	4.64346	5.95239	4.36274	7.33201	7.22244	5.77364	6.09236	5.64566	7.00785	7.27647	7.13049	4.19653	4.22026	4.87167	7.11392	7.07362	7.16578	2.42593	2.60071	6.8041	6.69887	5.21179	4.93161	5.78822	7.45622	6.99574	6.94939	3.22451	2.89436	3.00014	6.92696	6.96768	6.88527	chr18	34624624	34633265	8642	+	ENSEMBL	gene	NA	NA
ENSMUSG00000003808.18	protein_coding	Farsa	5.81978	5.86971	5.87987	6.01183	5.98003	5.69124	5.26598	5.54458	5.85953	5.97587	5.81626	5.95223	5.519	5.70833	5.63127	5.49616	5.98761	6.07335	5.988	5.41881	5.43245	5.86515	5.86135	6.04127	6.19384	5.908	5.78201	5.26598	5.21655	5.63616	5.61045	5.688	6.03859	6.06308	5.94964	chr8	84856989	84869257	12269	+	HAVANA	gene	NA	NA
ENSMUSG00000003809.14	protein_coding	Gcdh	4.20019	4.58003	4.51064	3.94982	3.56012	4.2592	4.33803	3.98807	3.96302	3.78205	4.37999	4.25709	4.17731	3.59291	3.63669	3.57318	3.90206	3.88257	4.12258	3.58508	3.80733	3.71206	3.63008	3.72073	3.85111	3.88159	4.25275	3.92513	3.76613	3.39446	3.33191	3.56977	3.89554	3.6893	3.9838	chr8	84886393	84893921	7529	-	HAVANA	gene	NA	NA
ENSMUSG00000003810.12	protein_coding	Mast2	4.99545	4.25472	4.27639	5.76348	5.66598	5.83515	5.65449	5.8418	6.10902	5.96841	6.10612	6.22113	5.88105	5.62552	5.64584	5.58276	6.18544	6.00334	5.99919	4.94545	4.84495	5.92271	5.94238	5.58692	5.77908	5.62299	5.95269	5.50275	5.26876	5.23392	5.28091	5.21784	5.998	6.06511	5.95826	chr4	116306762	116464183	157422	-	HAVANA	gene	NA	NA
ENSMUSG00000003812.13	protein_coding	Dnase2a	3.80122	4.2302	4.15124	3.22358	3.10843	3.63912	3.99235	3.17021	3.1687	2.74233	3.39197	3.13561	3.47812	3.12675	3.63276	3.8589	3.26247	3.42364	3.37971	3.69989	3.9205	3.54985	3.42969	2.80326	3.44689	3.35051	3.49398	3.8962	4.08071	3.33849	3.34789	3.43482	3.31604	3.32118	3.01057	chr8	84908560	84922915	14356	+	HAVANA	gene	NA	NA
ENSMUSG00000003813.15	protein_coding	Rad23a	5.61334	5.55892	5.51621	5.82668	5.77573	5.67113	5.2663	5.63121	5.83752	5.8212	5.8333	6.06503	5.55117	5.61843	5.69337	5.53986	5.93116	6.02663	5.95884	5.27	5.2624	5.77577	5.68284	5.83006	5.83887	5.83735	5.8182	5.11697	5.02483	5.47096	5.54021	5.57003	6.10289	6.01244	5.85016	chr8	84834019	84840665	6647	-	HAVANA	gene	NA	NA
ENSMUSG00000003814.8	protein_coding	Calr	8.61195	8.42101	8.38102	9.17163	9.0177	8.83826	8.19215	8.57819	8.87379	9.05245	9.11805	9.46706	8.71777	8.4671	8.73071	8.63416	9.24858	9.3505	9.38376	7.76519	7.85619	9.28965	9.21948	8.9567	9.1735	9.15522	8.93998	8.155	7.91493	8.33511	8.35401	8.35108	9.36844	9.3291	9.32665	chr8	84841850	84846934	5085	-	HAVANA	gene	NA	NA
ENSMUSG00000003847.16	protein_coding	Nfat5	6.7815	6.4398	6.53437	7.71188	7.79548	6.51167	6.84208	7.20352	7.15477	7.77744	6.91838	6.54889	6.85209	7.28213	7.15735	7.18504	6.7716	6.38459	6.60304	7.35138	7.30348	6.94831	6.8335	7.6969	7.71738	7.71997	6.58104	6.6857	6.92281	7.35083	7.35541	7.33221	6.66092	6.54851	6.72075	chr8	107293470	107379517	86048	+	HAVANA	gene	NA	NA
ENSMUSG00000003848.14	protein_coding	Nob1	5.04711	4.64616	4.75396	5.69584	5.59899	5.09249	4.58373	5.39315	5.55769	5.58061	5.39075	5.671	5.0644	5.48754	5.44243	5.27523	5.59458	5.91985	5.70977	4.96949	5.09898	5.66609	5.73168	5.58031	5.64089	5.57306	5.16147	4.72746	4.61031	5.15386	5.18192	5.34559	5.71605	5.77131	5.62664	chr8	107412486	107425051	12566	-	HAVANA	gene	NA	NA
ENSMUSG00000003865.16	protein_coding	Gys1	3.3408	3.33358	3.27216	3.32231	3.16792	4.50153	3.80728	3.08028	3.2475	3.25396	3.47893	3.7748	3.4222	3.28258	3.06311	3.1824	3.27717	3.37916	3.4089	3.21795	3.27139	3.29054	3.32984	3.41667	3.33255	3.20812	3.88664	3.59489	3.70624	3.52007	2.93341	2.92571	3.26527	3.28582	3.28419	chr7	45434844	45456619	21776	+	HAVANA	gene	NA	NA
ENSMUSG00000003868.14	protein_coding	Ruvbl2	5.70634	5.42375	5.51442	6.52877	6.07077	6.04856	5.31852	5.89163	6.1816	6.49027	6.20563	6.44339	5.83392	5.55133	5.80679	5.66796	6.37929	6.4806	6.52239	4.8214	4.83931	6.28076	6.22098	6.2671	6.34626	6.29326	6.11364	5.11022	4.93329	5.24797	5.36053	5.58644	6.50231	6.4516	6.39837	chr7	45421760	45438096	16337	-	HAVANA	gene	NA	NA
ENSMUSG00000003873.11	protein_coding	Bax	5.05977	5.05246	5.02449	5.14648	5.09528	5.01127	5.23435	5.06145	5.26636	5.05918	5.50648	5.51698	5.58234	4.72714	4.80385	4.79391	5.19448	5.24599	5.29941	4.63733	4.689	5.1772	5.25192	4.96531	5.12725	5.12699	5.23413	4.77885	4.79106	4.57612	4.73654	4.87342	5.50378	5.36287	5.21699	chr7	45461697	45466898	5202	-	HAVANA	gene	NA	NA
ENSMUSG00000003882.4	protein_coding	Il7r	7.82252	8.09619	8.25293	7.63677	8.00663	6.85397	7.82898	7.53955	7.34881	6.88114	6.31659	5.65358	6.60604	8.01343	7.81734	8.25437	5.86736	5.8906	5.65968	9.71711	9.73022	6.7683	7.62681	7.52381	7.62709	8.10849	6.5949	8.50744	8.44697	8.94355	9.06377	9.03659	6.24921	6.39876	6.53748	chr15	9506161	9529876	23716	-	ENSEMBL	gene	NA	NA
ENSMUSG00000003923.14	protein_coding	Tfam	5.86937	5.86066	5.8819	6.03264	5.85699	6.03861	5.80742	5.90139	5.95658	6.20484	6.05071	6.12488	5.97326	5.80128	5.86992	5.81045	6.04766	5.96352	6.08567	5.38941	5.51819	5.76762	5.68764	5.93858	5.84542	5.98035	6.07641	5.76311	5.53739	5.54084	5.64318	5.65019	6.00257	5.95554	5.93663	chr10	71225464	71238280	12817	-	HAVANA	gene	NA	NA
ENSMUSG00000003929.10	protein_coding	Zfp81	4.52778	4.48666	4.64538	4.51834	4.76954	4.23303	3.97628	4.56342	4.3182	4.61716	4.41232	4.32742	4.26577	4.73326	4.56039	4.73561	4.57677	4.34829	4.61613	4.64399	4.62783	4.52745	4.28906	4.59496	4.52316	4.58782	4.1348	4.09697	3.99284	4.80761	4.74266	4.79537	4.52905	4.53591	4.66398	chr17	33329342	33358878	29537	-	HAVANA	gene	NA	NA
ENSMUSG00000003948.17	protein_coding	Mmd	4.89166	4.61871	4.70311	5.15913	4.99275	5.11127	5.11944	4.77739	4.96414	4.98379	5.32127	5.57072	4.4963	5.62178	5.65745	5.40751	5.07655	4.55439	5.29575	5.04544	4.91399	5.38995	5.11886	4.86946	4.82112	4.89122	4.9759	4.82203	5.128	5.54428	5.48152	5.42495	5.02257	5.1317	5.22651	chr11	90249456	90278589	29134	+	HAVANA	gene	NA	NA
ENSMUSG00000003955.7	protein_coding	Fam162a	3.94374	3.60454	3.61386	4.9421	4.68937	5.12664	3.77114	3.65467	4.17045	4.40438	4.24546	4.60619	3.7928	4.53099	4.6233	4.4486	4.574	4.65266	4.66232	2.89846	3.26926	4.29097	4.08134	4.69866	4.70791	4.68505	4.63655	3.05003	3.11966	4.33225	4.1722	4.01872	4.70745	4.73091	4.61034	chr16	36043844	36071515	27672	-	ENSEMBL	gene	NA	NA
ENSMUSG00000003970.8	protein_coding	Rpl8	10.0027	10.1057	10.0894	9.89531	9.94888	10.0136	9.98329	10.0542	10.0651	9.91988	9.9666	10.0194	9.79551	9.93329	9.97921	9.91666	9.81448	9.93377	9.86128	9.68833	9.77783	9.75077	9.7839	9.8833	9.88434	9.92973	10.123	9.97368	9.86156	9.83946	9.85857	9.91432	9.92806	9.92752	9.82465	chr15	76904071	76906318	2248	+	ENSEMBL	gene	NA	NA
ENSMUSG00000003992.14	protein_coding	Ssbp2	5.09028	4.60865	4.54491	5.0987	5.65552	6.03754	5.93438	5.51969	5.35746	5.23528	5.39679	5.06179	5.77925	5.98569	5.96034	5.85948	5.5533	5.21952	5.26765	5.57821	5.58229	5.36014	5.48053	5.28311	5.51009	5.38914	6.10482	6.338	6.36372	5.97459	5.76372	5.99208	5.12588	5.12983	5.42243	chr13	91460283	91703429	243147	+	HAVANA	gene	NA	NA
ENSMUSG00000004018.9	protein_coding	Fancl	3.74277	3.84383	3.79033	4.04667	3.65467	3.76008	3.81382	3.68716	3.79797	4.22107	3.80372	3.95017	3.85053	3.67021	3.69663	3.43744	3.8422	3.72876	3.83831	3.10017	3.11839	3.61775	3.48367	3.82073	3.97351	3.72747	3.9526	3.69242	3.28823	3.29306	3.34136	3.4314	3.56565	3.54708	3.63774	chr11	26386135	26471876	85742	+	HAVANA	gene	NA	NA
ENSMUSG00000004040.16	protein_coding	Stat3	7.53316	7.45174	7.30443	7.72792	8.11704	7.5578	7.72613	7.90867	7.84587	7.81117	7.65667	7.65159	7.68184	7.60427	7.80235	7.69151	7.68226	7.70818	7.61247	7.17078	7.27137	7.64946	7.66196	7.82177	7.98713	7.77969	7.5386	7.58134	7.63531	7.69322	7.56976	7.88232	7.70996	7.6749	7.61033	chr11	100885098	100939540	54443	-	HAVANA	gene	NA	NA
ENSMUSG00000004043.14	protein_coding	Stat5a	6.23691	6.32977	6.3226	6.30229	6.49483	5.7036	5.94282	6.70256	6.76054	6.88307	6.10628	5.9353	6.0381	6.14499	6.27622	6.17245	5.99833	5.99395	5.81383	5.85706	5.87195	6.02816	6.03818	6.53317	6.48852	6.39182	5.83093	5.92584	5.82397	6.18327	6.04189	6.19484	6.04003	6.15258	6.05324	chr11	100859351	100885169	25819	+	HAVANA	gene	NA	NA
ENSMUSG00000004054.8	protein_coding	Map3k11	5.69766	5.73418	5.83601	5.56351	5.57409	5.41254	5.54271	5.62944	5.65056	5.38312	5.60472	5.52061	5.37662	5.84046	5.68739	5.6168	5.58774	5.46891	5.47112	5.84563	5.77198	5.61727	5.64576	5.6438	5.62172	5.48911	5.57779	5.40332	5.43712	5.87636	5.87026	5.88537	5.75446	5.62481	5.53172	chr19	5689131	5702862	13732	+	ENSEMBL	gene	NA	NA
ENSMUSG00000004056.15	protein_coding	Akt2	6.8713	6.5949	6.55764	7.17305	7.1092	7.07732	7.09183	7.26674	7.27181	7.36288	7.31438	7.45849	7.25573	7.28884	7.22152	7.14461	7.25422	7.32088	7.23077	6.99621	6.83197	7.14754	7.09112	7.17209	7.24162	7.1054	7.16759	6.80233	6.79538	7.04036	7.17544	7.11438	7.26312	7.38451	7.15146	chr7	27591552	27640826	49275	+	HAVANA	gene	NA	NA
ENSMUSG00000004069.16	protein_coding	Dnaja3	5.39116	5.38201	5.33136	5.69985	5.52586	5.32546	4.8521	5.23965	5.42621	5.4963	5.52565	5.77331	5.17056	5.45425	5.46201	5.34188	5.59322	5.7703	5.71297	5.00093	5.06351	5.61092	5.46242	5.61305	5.69409	5.64605	5.38763	4.96154	4.74605	5.36648	5.14125	5.42984	5.78923	5.68415	5.6534	chr16	4639989	4707695	67707	+	HAVANA	gene	NA	NA
ENSMUSG00000004070.15	protein_coding	Hmox2	5.33178	5.1032	5.16742	5.59516	5.42578	5.72428	5.57682	5.24275	5.56019	5.67308	5.59214	5.7896	5.54607	5.42682	5.62469	5.52269	5.72498	5.78051	5.75795	5.03422	4.93537	5.52035	5.4131	5.46189	5.66653	5.67037	5.69151	5.54136	5.67967	5.22591	5.36607	5.28999	5.57501	5.61733	5.65181	chr16	4726361	4766742	40382	+	HAVANA	gene	NA	NA
ENSMUSG00000004071.12	protein_coding	Cdip1	5.54342	5.66022	5.7445	5.49496	5.80227	4.99499	5.04363	5.59119	5.5106	5.58234	4.99171	4.62389	5.12609	5.89816	5.85242	5.72233	5.00296	4.90129	4.83414	5.92197	6.00128	5.15702	5.02126	5.68315	5.58194	5.40328	5.05105	5.34022	5.36487	5.91871	6.00708	5.89079	4.95548	4.99178	5.04034	chr16	4750348	4790292	39945	-	HAVANA	gene	NA	NA
ENSMUSG00000004096.8	protein_coding	Cwc15	5.71327	5.61146	5.63553	5.77112	5.55443	6.44485	6.23057	5.54458	5.74288	5.88673	6.09833	6.3765	6.3657	5.37108	5.50332	5.51938	6.05363	6.14709	6.24014	4.80109	4.85719	5.89335	5.95958	5.5441	5.43834	5.76669	6.49776	6.37495	6.35292	5.1681	5.16398	5.31771	5.74359	5.97942	5.988	chr9	14500617	14510577	9961	+	HAVANA	gene	NA	NA
ENSMUSG00000004099.15	protein_coding	Dnmt1	8.21078	7.62678	7.63791	9.16394	8.56533	9.52621	9.13123	8.70219	8.88003	9.04239	9.04913	9.29284	9.20942	8.35861	8.49782	8.53136	9.27852	9.35812	9.29788	7.25415	7.45087	8.95775	8.93807	8.7916	8.81818	8.94867	9.57708	8.93355	8.74041	7.84835	7.83778	7.7962	9.19503	9.18459	9.0978	chr9	20907206	20959888	52683	-	ENSEMBL	gene	NA	NA
ENSMUSG00000004100.11	protein_coding	Ppan	5.63507	5.58971	5.71864	6.43332	6.13938	4.56735	3.91774	5.92278	6.16676	6.51286	5.72359	5.9978	5.16137	5.69129	5.87554	5.69282	5.92494	6.16933	5.94327	4.95618	5.18694	5.88372	5.83467	6.31722	6.44269	6.26323	4.56323	3.92077	3.31038	5.64637	5.65606	5.72788	6.10379	6.12083	5.93663	chr9	20888175	20892178	4004	+	HAVANA	gene	NA	NA
ENSMUSG00000004127.12	protein_coding	Trmt10a	3.61912	3.35599	3.25182	4.16371	3.69342	3.77008	3.57813	4.02596	3.99797	4.34385	4.22702	4.4087	4.02535	3.20976	3.70338	3.5433	4.53328	4.63171	4.61356	2.8417	3.4352	4.42754	4.13143	3.75502	3.93259	4.00485	3.62914	3.66025	3.57918	3.47403	3.51281	3.63576	4.60218	4.4813	4.3269	chr3	138143448	138159821	16374	+	HAVANA	gene	NA	NA
ENSMUSG00000004207.14	protein_coding	Psap	8.57267	9.13868	9.02375	7.72743	7.79008	8.41143	8.50128	8.11074	8.06585	7.6895	8.20331	7.98126	8.397	7.98516	7.94007	8.00935	8.08892	8.03766	7.97971	8.15205	8.10535	8.02187	8.04243	7.86373	7.75035	7.74392	8.45311	8.64224	8.6608	7.92533	7.91284	7.98968	7.93982	8.10071	7.82862	chr10	60277627	60302597	24971	+	HAVANA	gene	NA	NA
ENSMUSG00000004221.16	protein_coding	Ikbkg	6.14117	6.44781	6.35386	5.81093	5.94377	5.87853	5.99134	5.92725	5.77062	5.76794	5.76365	5.67666	5.89036	6.16128	6.16425	6.13214	5.585	5.7227	5.66343	6.10635	6.15063	5.76609	5.65766	5.91177	5.77107	5.73815	5.79396	6.19665	6.23594	6.11772	6.02798	6.0757	5.52932	5.52213	5.75685	chrX	74393290	74453854	60565	+	HAVANA	gene	NA	NA
ENSMUSG00000004233.14	protein_coding	Wars2	3.72227	3.73445	3.65546	3.85953	3.95243	3.28857	3.82522	3.94341	3.9069	3.65779	3.47434	3.33133	3.1417	3.71036	4.19304	4.10536	3.57685	3.61837	3.55551	3.89505	4.08634	3.85868	3.75789	3.95126	4.17625	4.07526	3.216	3.59996	3.57918	4.22048	4.07959	4.05776	3.5158	3.29166	3.48482	chr3	99141068	99239186	98119	+	HAVANA	gene	NA	NA
ENSMUSG00000004263.15	protein_coding	Atn1	4.64023	3.16892	3.00623	6.28205	6.43197	5.87271	5.6243	6.5769	6.39933	6.22376	6.15306	5.72911	6.11804	6.08992	6.31188	6.6828	5.93791	5.98183	5.91135	6.33257	6.53513	6.24444	6.64442	6.34665	6.35176	6.39763	5.86061	5.66826	5.35025	6.63866	6.48998	6.61163	6.12488	6.27954	5.96895	chr6	124742544	124756524	13981	-	HAVANA	gene	NA	NA
ENSMUSG00000004264.17	protein_coding	Phb2	6.84614	6.71326	6.79274	7.52598	7.17553	6.90893	6.57683	6.93673	7.22147	7.29418	7.0416	7.42498	6.87863	6.79558	6.89426	6.80973	7.03713	7.319	7.27815	5.9926	6.05855	6.99786	6.9965	7.1992	7.22173	7.27495	7.05328	6.48412	6.31908	6.50001	6.69243	6.51727	7.30871	7.19592	7.126	chr6	124712336	124716950	4615	+	HAVANA	gene	NA	NA
ENSMUSG00000004266.15	protein_coding	Ptpn6	7.38604	7.7511	7.61495	7.55652	7.48064	7.20166	6.86118	6.95509	7.16754	7.45862	6.99618	7.00714	7.00124	7.18442	7.24737	7.10561	6.96471	7.02572	6.9342	6.45531	6.52123	6.77	6.66439	7.54151	7.59887	7.43553	7.23921	7.19377	6.85235	7.07495	7.11254	7.11513	7.02501	7.14836	6.95382	chr6	124720707	124738714	18008	-	HAVANA	gene	NA	NA
ENSMUSG00000004268.11	protein_coding	Emg1	6.9248	7.04684	6.9828	6.90841	7.01496	6.75708	6.62462	6.85167	6.85366	6.8113	6.9923	7.11435	6.59974	6.74096	6.67245	6.68932	7.0631	7.09126	7.03015	6.55578	6.61172	6.87203	6.91804	6.82382	6.85686	6.88293	6.83928	6.61068	6.52743	6.7049	6.71281	6.66847	7.1116	7.14874	7.05213	chr6	124704085	124712178	8094	-	HAVANA	gene	NA	NA
ENSMUSG00000004270.13	protein_coding	Lpcat3	4.94854	4.68053	4.71943	5.10966	5.16155	5.96865	5.34919	4.71082	4.84557	4.89471	4.97189	5.46321	5.36349	4.96704	4.99457	5.04946	5.37035	5.60823	5.65482	4.92448	4.83691	5.15691	5.09991	5.06408	5.03015	4.96077	6.0418	5.48519	5.38352	4.96685	5.0123	4.96226	5.43353	5.22128	5.24415	chr6	124663027	124704418	41392	+	HAVANA	gene	NA	NA
ENSMUSG00000004285.12	protein_coding	Atp6v1f	5.19021	5.30027	5.34315	5.11568	4.89993	5.35001	5.096	5.09324	5.10506	5.15095	5.20813	5.49883	5.36331	4.89334	4.91109	4.91705	5.17089	5.36242	5.41698	4.34643	4.51803	4.99895	5.11026	4.96328	5.00055	5.03292	5.39369	5.26426	5.12965	4.6642	4.88081	4.73643	5.14756	5.17634	4.96255	chr6	29467718	29470512	2795	+	HAVANA	gene	NA	NA
ENSMUSG00000004317.14	protein_coding	Clcn5	4.23164	3.62749	3.42693	4.49776	4.60448	5.51923	4.9183	4.51729	4.67372	4.63139	5.47407	5.83545	5.64967	4.18233	4.23218	4.3773	5.94863	5.9853	5.93702	3.64602	4.00947	6.00657	5.87148	4.40759	4.51039	4.54484	5.37239	4.83312	4.64069	3.90035	3.93905	3.79441	5.81022	5.83457	5.84903	chrX	7153810	7319358	165549	-	HAVANA	gene	NA	NA
ENSMUSG00000004319.15	protein_coding	Clcn3	6.76305	6.53056	6.69107	6.87031	6.92201	7.53439	6.57482	6.76181	6.72336	6.78025	6.98371	7.13347	6.65818	6.79011	6.85858	6.80998	7.21946	7.13845	7.21187	6.55632	6.86489	7.1058	7.0584	6.82856	6.83796	6.86942	7.03632	6.58822	6.63461	6.82777	6.82701	6.83593	7.1302	7.07331	7.24366	chr8	60910389	60983300	72912	-	HAVANA	gene	NA	NA
ENSMUSG00000004356.7	protein_coding	Utp20	6.86062	6.60757	6.55481	7.8366	7.6803	6.3369	5.99371	7.26971	7.48088	7.76055	7.18885	7.52143	6.57406	7.35924	7.4063	7.27179	7.38721	7.51147	7.39262	6.37687	6.54953	7.26489	7.31013	7.61295	7.75306	7.67209	6.56905	5.66895	5.30714	7.27469	7.20459	7.28878	7.64501	7.57156	7.44092	chr10	88746607	88826814	80208	-	ENSEMBL	gene	NA	NA
ENSMUSG00000004364.14	protein_coding	Cul3	7.48404	7.3084	7.32837	7.66729	7.51353	7.72347	7.32004	7.49293	7.56227	7.69177	7.82759	8.08985	7.70575	7.49065	7.59554	7.57997	7.90332	7.90202	7.99461	7.31952	7.39866	7.88904	7.74033	7.58384	7.67115	7.63158	7.61574	7.51973	7.54402	7.46125	7.4267	7.37824	7.8483	7.7399	7.962	chr1	80264923	80340480	75558	-	HAVANA	gene	NA	NA
ENSMUSG00000004393.10	protein_coding	Ddx56	5.32715	5.36656	5.30143	5.84719	5.62347	4.87075	4.38199	5.3117	5.57105	5.68662	5.43526	5.7376	4.98845	5.32394	5.33866	5.16911	5.55445	5.80305	5.70557	4.7588	4.75362	5.53577	5.51618	5.68257	5.85176	5.78181	5.13461	4.22249	3.98855	5.17517	5.21712	5.10123	5.805	5.76882	5.6076	chr11	6258919	6267772	8854	-	HAVANA	gene	NA	NA
ENSMUSG00000004394.12	protein_coding	Tmed4	4.59604	4.85629	4.77444	4.25238	4.53737	4.45582	4.45242	4.38481	4.38026	4.35092	4.50518	4.49569	4.46575	4.3582	4.34034	4.41494	4.25969	4.3046	4.2548	4.20058	4.48054	4.22039	4.34247	4.38046	4.10582	4.36504	4.42522	4.42042	4.41326	4.30672	4.45627	4.42176	4.29598	4.53386	4.47284	chr11	6270369	6274870	4502	-	HAVANA	gene	NA	NA
ENSMUSG00000004446.12	protein_coding	Bid	4.55497	4.67399	4.73319	4.85274	4.64224	4.03148	3.53191	4.25308	4.42491	4.5907	4.34453	4.85694	3.85114	4.51817	4.55759	4.40874	4.62032	4.7082	4.88643	3.96049	3.97955	4.52069	4.6366	4.76776	4.77352	4.63725	4.23262	3.62693	3.23275	4.45353	4.14504	4.33702	4.92029	4.88138	4.81861	chr6	120891930	120916853	24924	-	HAVANA	gene	NA	NA
ENSMUSG00000004455.16	protein_coding	Ppp1cc	8.09998	7.98514	8.03668	8.26979	8.0091	8.57601	8.3606	8.06738	8.21862	8.26771	8.38318	8.59655	8.34858	7.89176	7.90128	7.93798	8.48378	8.47961	8.4778	7.51866	7.63674	8.33713	8.20323	8.09987	8.10428	8.20503	8.53735	8.33278	8.25598	7.73905	7.802	7.70786	8.45845	8.39231	8.44881	chr5	122158278	122175273	16996	+	HAVANA	gene	NA	NA
ENSMUSG00000004460.16	protein_coding	Dnajb11	6.22274	5.92866	5.98025	6.71351	6.45942	6.59299	6.08077	6.25485	6.56917	6.66183	6.79944	7.19525	6.58557	6.06876	6.27106	6.19636	7.01284	7.15078	7.13391	5.38941	5.41434	7.00189	6.86325	6.44129	6.41725	6.56495	6.72965	6.17113	5.97248	5.82334	5.95613	5.90958	7.12392	7.09127	7.09634	chr16	22857845	22879634	21790	+	HAVANA	gene	NA	NA
ENSMUSG00000004462.6	protein_coding	Tbccd1	3.81239	3.89678	3.96384	3.99293	3.47899	3.64668	3.30711	3.83474	3.83906	3.86468	3.72658	3.59124	3.48904	3.90525	3.57714	3.77962	3.51473	3.72164	3.72261	3.81475	3.60157	3.70412	3.70902	3.76336	3.75151	3.78793	3.66463	3.67423	3.59054	3.68936	3.67354	3.58321	3.70698	3.81045	3.70551	chr16	22813215	22857569	44355	-	ENSEMBL	gene	NA	NA
ENSMUSG00000004500.9	protein_coding	Zfp324	3.93673	4.25103	4.35628	3.68851	3.60452	3.58595	3.19655	3.47806	3.69299	3.32573	3.72658	3.58206	3.31202	3.66452	3.28398	3.70055	3.80631	3.57766	3.81898	3.22569	3.31257	3.59677	3.36348	3.62123	3.615	3.93249	3.47777	3.38934	3.52099	3.47689	3.54087	3.50062	3.76188	3.89507	3.95827	chr7	12965838	12974236	8399	+	HAVANA	gene	NA	NA
ENSMUSG00000004530.12	protein_coding	Coro1c	6.71434	6.16414	6.13305	7.46589	7.05059	7.63849	7.18841	7.07645	7.28997	7.28179	7.75472	8.05369	7.50519	6.93892	6.93658	6.88523	7.83295	7.88312	7.87	6.25618	6.19764	7.66574	7.65856	7.20008	7.27261	7.328	7.65422	6.99707	6.90756	6.60108	6.61389	6.69756	7.77733	7.7527	7.73084	chr5	113842436	113908758	66323	-	HAVANA	gene	NA	NA
ENSMUSG00000004535.12	protein_coding	Tax1bp1	7.59884	7.61757	7.63221	7.19839	7.46845	7.75138	7.94589	7.48156	7.49293	7.38805	7.47256	7.57734	7.85957	7.54358	7.66281	7.56609	7.3443	7.32761	7.36329	7.85593	7.89689	7.45407	7.52555	7.2509	7.33551	7.33864	7.70427	8.01987	8.12655	7.72187	7.81713	7.77154	7.29188	7.3438	7.4309	chr6	52713729	52766780	53052	+	HAVANA	gene	NA	NA
ENSMUSG00000004552.16	protein_coding	Ctse	4.28272	4.90525	5.30847	2.46919	2.78899	2.57118	2.59415	3.19122	3.06901	2.33321	2.92129	2.63372	3.11654	3.64695	3.36304	3.37738	2.76823	2.83131	2.40549	8.06764	8.16736	7.42585	7.77312	2.72126	2.64937	2.57534	2.58276	3.034	2.99695	3.22764	3.21487	3.23711	1.97896	2.39839	2.54326	chr1	131638306	131675505	37200	+	HAVANA	gene	NA	NA
ENSMUSG00000004558.14	protein_coding	Ndrg2	3.37952	3.35578	3.37807	3.04922	2.84557	5.00049	4.1303	3.409	3.14759	3.21039	3.58383	3.3368	4.4732	3.41748	3.46811	3.25129	3.40071	3.21436	3.05308	3.78496	3.38874	2.20848	2.14882	3.37469	3.1051	3.09066	4.70388	4.17212	4.18871	3.28105	3.21487	3.4428	2.62543	3.13035	2.69526	chr14	51905271	51913488	8218	-	ENSEMBL	gene	NA	NA
ENSMUSG00000004561.14	protein_coding	Mettl17	4.84734	5.16754	5.07017	4.39766	4.76954	4.43015	4.65116	4.72639	4.54416	4.38562	4.34931	4.1679	4.33201	4.91797	4.72968	4.81712	4.37542	4.17414	4.21169	5.1833	5.1031	4.38083	4.42457	4.62609	4.52951	4.52286	4.51636	4.68959	4.73329	5.14668	5.04656	4.91617	4.21173	4.22795	4.188	chr14	51884842	51893039	8198	+	HAVANA	gene	NA	NA
ENSMUSG00000004565.15	protein_coding	Pnpla6	5.34184	5.53277	5.44703	5.1687	5.37706	5.04252	5.19381	5.38161	5.3284	5.31275	5.10735	4.79872	4.79194	5.39934	5.46351	5.51361	4.85491	4.74544	4.98319	5.37948	5.44386	5.09767	4.95698	5.35883	5.31706	5.21872	4.99224	5.22244	5.48204	5.63103	5.40823	5.4738	4.8712	4.99651	4.88787	chr8	3515384	3544267	28884	+	HAVANA	gene	NA	NA
ENSMUSG00000004567.16	protein_coding	Mcoln1	5.05507	5.05246	5.01592	4.80926	5.17846	4.81231	5.16474	5.45686	5.3137	4.70051	4.73619	4.5602	4.54094	5.45257	5.46948	5.35968	4.70114	4.67213	4.60491	5.91879	5.76939	4.90341	5.13402	5.21267	5.18264	4.96118	4.85196	5.17024	5.27229	5.4417	5.62363	5.42238	4.63284	4.73601	4.66398	chr8	3500457	3515232	14776	+	HAVANA	gene	NA	NA
ENSMUSG00000004568.12	protein_coding	Arhgef18	8.03741	8.34589	8.33067	7.20098	7.82509	7.77821	8.24271	7.97631	7.83384	7.07495	7.32548	6.8202	7.13918	8.20272	8.02077	8.0896	7.21191	6.90784	6.99385	8.99815	8.95176	7.31558	7.45087	7.62005	7.56282	7.46399	7.91073	8.25777	8.41757	8.48241	8.55142	8.48017	7.1354	7.19875	7.12818	chr8	3393006	3456601	63596	+	HAVANA	gene	NA	NA
ENSMUSG00000004591.16	protein_coding	Pkn2	6.77953	6.72194	6.87434	6.71797	6.81273	6.70549	6.80084	6.68292	6.61091	6.75305	6.73608	6.78264	6.72887	6.75705	6.7994	6.75404	6.83247	6.7989	6.83295	6.6524	6.78235	6.90872	6.73486	6.68559	6.74007	6.65233	6.71582	6.76613	6.78867	6.79602	6.76591	6.86373	6.83742	6.71683	6.83623	chr3	142790902	142882004	91103	-	HAVANA	gene	NA	NA
ENSMUSG00000004610.4	protein_coding	Etfb	4.49735	4.22116	4.23477	5.02112	4.60448	5.38904	5.05585	4.49365	4.77291	5.07141	5.26488	5.50613	5.12399	4.29191	4.63397	4.40562	5.06059	5.2271	5.36871	3.27797	3.5233	5.03103	5.07738	4.69117	4.87502	4.99749	5.50135	4.75949	4.54466	3.83933	4.06033	3.80592	5.1268	5.08723	5.04572	chr7	43444083	43457800	13718	+	HAVANA	gene	NA	NA
ENSMUSG00000004612.9	protein_coding	Nkg7	6.18296	6.02797	6.10213	5.60364	5.46396	7.18646	6.90747	5.91746	6.16361	5.38031	7.48327	7.93403	6.53425	5.41672	5.58667	5.64214	7.22432	7.38608	7.67657	4.35862	5.04864	7.37832	7.29063	5.0481	5.15829	5.71431	7.19336	6.3379	6.43951	5.34155	5.25149	5.35737	7.41687	7.38827	7.39724	chr7	43437073	43438249	1177	+	HAVANA	gene	NA	NA
ENSMUSG00000004626.14	protein_coding	Stxbp2	6.01046	6.09229	6.01077	5.71578	5.65547	6.36352	6.2485	5.86777	5.8352	5.70468	5.91868	6.00039	6.04334	5.98732	5.92957	5.84991	6.01846	6.03627	6.06617	6.02329	5.86945	5.92527	5.9681	5.88059	5.89539	5.74549	6.50827	6.38367	6.41974	5.8075	5.91652	5.77257	5.87141	5.92232	5.86972	chr8	3630955	3643644	12690	+	HAVANA	gene	NA	NA
ENSMUSG00000004637.15	protein_coding	Wwox	3.39199	3.14922	3.1237	3.76703	3.73004	3.6906	3.5577	3.79276	3.7512	3.74762	3.40718	3.16307	3.377	3.8854	3.92858	3.93016	3.57685	3.56845	3.33966	3.66577	3.69726	3.56207	3.5766	3.86255	3.83584	3.63239	3.53367	3.69477	3.68366	3.91731	3.68615	3.71115	3.5158	3.33269	3.59938	chr8	114439655	115352708	913054	+	HAVANA	gene	NA	NA
ENSMUSG00000004642.13	protein_coding	Slbp	6.79232	6.36084	6.45635	7.53598	6.96201	7.68597	7.22158	7.0563	7.22799	7.49986	7.61083	7.91584	7.45535	6.78871	6.88665	6.96528	7.78717	7.78245	7.78267	5.70269	5.88144	7.47648	7.30151	7.22396	7.16211	7.33893	7.78907	6.99285	6.78056	6.27221	6.30189	6.37325	7.57763	7.58507	7.70924	chr5	33634952	33652574	17623	-	HAVANA	gene	NA	NA
ENSMUSG00000004661.15	protein_coding	Arid3b	5.49644	5.4122	5.47797	5.33861	5.62616	5.32544	5.27254	5.52633	5.57046	5.41608	5.26827	4.9658	5.23771	5.97156	5.73357	5.77779	5.45796	5.21924	5.06571	6.42925	6.28257	5.47177	5.51175	5.63562	5.61427	5.44279	5.34077	5.49009	5.50266	5.94111	6.05114	5.93706	5.29522	5.46175	5.34861	chr9	57790353	57836793	46441	-	HAVANA	gene	NA	NA
ENSMUSG00000004665.10	protein_coding	Cnn2	8.5928	8.80806	8.66789	8.26688	8.31995	8.53118	8.65216	8.33159	8.30148	8.13792	8.65995	8.65646	8.17361	8.5715	8.53475	8.41099	8.47601	8.4627	8.44618	8.45751	8.42749	8.36225	8.33993	8.34256	8.30975	8.26895	8.54046	8.58495	8.66651	8.50994	8.62413	8.51258	8.47556	8.52659	8.44168	chr10	79988584	79996062	7479	+	HAVANA	gene	NA	NA
ENSMUSG00000004667.18	protein_coding	Polr2e	5.38554	5.52624	5.4848	5.7217	5.71994	5.09975	4.88303	5.29128	5.42621	5.45822	5.17621	5.36211	4.79392	5.35132	5.39618	5.42723	5.17272	5.30538	5.19254	4.99314	5.19468	5.19714	5.3537	5.63745	5.68276	5.78296	5.1861	4.50715	4.15467	5.45338	5.2892	5.39596	5.48433	5.26026	5.14714	chr10	80035949	80039795	3847	-	HAVANA	gene	NA	NA
ENSMUSG00000004677.15	protein_coding	Myo9b	7.60886	7.66922	7.59349	7.44587	7.51062	7.70276	7.70537	7.54041	7.56083	7.46953	7.55742	7.57642	7.4944	7.64098	7.6339	7.54716	7.62093	7.58406	7.56202	7.72378	7.6903	7.57554	7.73199	7.4886	7.55585	7.36823	7.70457	7.59267	7.63015	7.64501	7.61583	7.58194	7.59901	7.60055	7.50698	chr8	71272714	71360712	87999	+	ENSEMBL	gene	NA	NA
ENSMUSG00000004707.14	protein_coding	Ly9	6.99388	7.13439	7.18986	6.74877	6.62615	6.91695	6.78455	6.7297	6.74921	6.77672	6.98937	7.00665	6.84205	6.6398	6.70582	6.7644	6.9047	7.15962	7.12491	6.49107	6.59189	6.93141	6.83816	6.6551	6.64759	6.80014	6.81616	6.93207	6.93065	6.69509	6.75097	6.58515	7.12288	7.14984	7.01302	chr1	171588624	171607410	18787	-	HAVANA	gene	NA	NA
ENSMUSG00000004771.12	protein_coding	Rab11a	5.18147	5.15198	5.20343	5.07576	5.09939	5.40811	5.1004	5.00406	5.09716	5.14434	5.4	5.59206	5.25511	5.05751	5.15986	5.10914	5.22458	5.1628	5.38848	4.88775	4.96742	5.37512	5.10512	5.05312	5.11583	5.13244	5.28334	5.15365	5.25811	5.1681	5.15039	5.15172	5.28063	5.18009	5.38612	chr9	64715299	64737758	22460	-	HAVANA	gene	NA	NA
ENSMUSG00000004788.11	protein_coding	Eif2b2	4.84111	4.77124	4.79319	5.00663	4.76466	5.1652	5.13078	4.76046	4.93972	4.92698	5.11017	5.22292	5.09852	4.58736	4.78277	4.54793	4.93471	5.2689	5.16683	4.3787	4.24751	4.81037	4.83805	4.78165	5.08696	4.89854	5.2509	5.23301	5.22569	4.63372	4.57637	4.56412	5.05827	4.99225	4.80912	chr12	85219481	85226628	7148	+	HAVANA	gene	NA	NA
ENSMUSG00000004789.9	protein_coding	Dlst	6.52696	6.4519	6.45278	6.88748	6.67641	6.47864	6.2185	6.52169	6.74543	6.84191	6.74562	6.98636	6.52711	6.47945	6.52424	6.52296	6.74048	6.81747	6.91746	6.10996	6.20152	6.83478	6.74095	6.67508	6.69563	6.83289	6.55764	6.25649	6.14326	6.25901	6.3894	6.36938	6.88889	6.79721	6.86743	chr12	85110833	85134091	23259	+	ENSEMBL	gene	NA	NA
ENSMUSG00000004798.14	protein_coding	Ulk2	5.4461	5.56762	5.68736	5.0147	5.21471	5.05565	5.2931	5.45809	5.40611	5.30389	5.41717	5.15647	5.08562	5.46265	5.51779	5.49323	4.97511	4.91299	4.96225	5.97661	5.87428	5.18151	5.10168	5.04041	5.17052	5.05031	5.10355	5.0775	5.31743	5.54903	5.62035	5.6309	5.03617	4.94892	5.0618	chr11	61775649	61855073	79425	-	HAVANA	gene	NA	NA
ENSMUSG00000004815.12	protein_coding	Dgkq	5.09839	5.5094	5.49364	4.49997	4.87528	4.27152	4.49181	4.90314	4.77238	4.56135	4.61501	4.38248	4.30282	4.96886	4.76243	4.96932	4.45495	4.47227	4.27567	5.29063	5.22497	4.62456	4.79566	4.8885	4.72807	4.6339	4.39279	4.75722	4.73667	5.03272	5.07692	4.92427	4.39308	4.64745	4.52148	chr5	108646693	108669672	22980	-	HAVANA	gene	NA	NA
ENSMUSG00000004837.2	protein_coding	Grap	6.62089	6.82889	6.87019	6.43499	6.49523	6.67058	7.12684	6.22215	6.36286	6.49287	6.39553	6.52933	6.75915	6.09923	5.86653	5.99365	6.1253	6.21281	6.27595	6.03093	6.06257	6.11679	6.0789	6.81843	6.56198	6.57031	6.78828	7.6268	7.38102	5.97285	6.01483	5.9824	6.14154	6.2656	6.07571	chr11	61653265	61672784	19520	+	HAVANA	gene	NA	NA
ENSMUSG00000004843.6	protein_coding	Chmp2b	4.44248	4.45568	4.43731	4.32425	4.34146	4.65863	4.49308	4.30831	4.29306	4.49017	4.53485	4.46607	4.70391	4.42157	4.59082	4.53089	4.34329	4.32388	4.68381	4.29239	4.51803	4.35572	4.21144	4.34659	4.31858	4.34951	4.52237	4.81448	4.90693	4.33856	4.31717	4.42176	4.25829	4.27783	4.27331	chr16	65539133	65562697	23565	-	ENSEMBL	gene	NA	NA
ENSMUSG00000004846.10	protein_coding	Plod3	3.75289	3.7402	3.67354	4.00975	4.67565	3.78271	3.77488	4.28484	4.53736	4.79743	4.53004	4.53906	3.92801	3.7354	3.71428	3.7604	3.47002	3.57467	3.80131	3.32485	3.27599	3.62764	3.47094	3.91605	3.98075	3.93524	3.63748	2.64638	3.06614	3.49384	3.43046	3.43185	3.85713	3.74001	3.81445	chr5	136987019	136996648	9630	+	HAVANA	gene	NA	NA
ENSMUSG00000004849.14	protein_coding	Ap1s1	4.25879	3.85605	3.90933	4.82769	4.17481	5.13726	4.73266	4.38481	4.45427	4.54382	5.00204	5.16878	4.84075	4.29567	4.38837	4.38996	5.18001	5.32874	5.44745	3.58508	3.68083	4.89472	4.8848	4.62352	4.51679	4.65505	5.18958	4.4327	4.5388	3.74744	3.86328	4.22143	5.01825	5.14596	5.02127	chr5	137034993	137046135	11143	-	HAVANA	gene	NA	NA
ENSMUSG00000004865.15	protein_coding	Srpk1	8.23539	7.97421	8.02123	8.42825	8.57819	8.44655	8.50791	8.52861	8.4687	8.31458	8.27916	8.21568	8.21286	8.66957	8.53848	8.60998	8.22563	8.23263	8.2041	9.01553	8.97367	8.23646	8.33121	8.48182	8.41971	8.44085	8.47259	8.58781	8.66063	8.75821	8.81683	8.70507	8.28397	8.30524	8.18707	chr17	28587648	28622521	34874	-	HAVANA	gene	NA	NA
ENSMUSG00000004880.11	protein_coding	Lbr	8.39156	8.2301	8.24194	8.09153	7.85445	9.45362	9.29648	8.22721	8.22758	8.08588	8.79624	8.97668	9.1017	8.06016	8.03108	8.04858	9.07655	8.99702	9.0606	8.12854	8.15167	8.76581	8.59625	7.99207	7.9575	8.06814	9.52029	9.21719	9.19063	7.98174	7.93185	8.02118	8.84799	8.88651	8.86445	chr1	181815335	181843046	27712	-	HAVANA	gene	NA	NA
ENSMUSG00000004895.9	protein_coding	Prcc	5.16544	5.10452	5.0796	5.30784	5.25356	5.38162	5.22633	5.24956	5.27921	5.3789	5.33402	5.30609	5.24063	5.14565	5.28215	5.10147	5.25274	5.24455	5.30219	5.05186	5.19082	5.22237	5.33186	5.22119	5.26669	5.19285	5.3846	5.23477	5.1316	5.04227	5.2084	5.24769	5.22385	5.21343	5.19165	chr3	87858903	87885608	26706	-	HAVANA	gene	NA	NA
ENSMUSG00000004896.16	protein_coding	Rrnad1	5.21767	5.39376	5.45916	4.85958	5.13452	4.55794	4.81719	5.24715	5.18288	4.66431	5.04146	4.70642	5.0416	5.24411	5.01224	5.26639	4.78053	4.89497	4.70322	5.60218	5.57891	4.789	5.13555	5.09886	4.77997	5.04009	4.58832	4.93884	4.87699	5.45696	5.4526	5.41288	4.74249	4.88414	4.75151	chr3	87922601	87930717	8117	-	HAVANA	gene	NA	NA
ENSMUSG00000004897.16	protein_coding	Hdgf	7.3864	6.78171	6.9483	8.28517	7.8356	8.32931	7.74308	7.68462	7.96639	8.0992	8.11364	8.50309	8.07096	7.46789	7.67644	7.67674	8.41954	8.62592	8.56094	6.56832	6.68409	8.24885	8.28245	7.90451	8.01763	8.15054	8.3873	7.6318	7.54146	7.14655	7.07745	7.18461	8.39363	8.43613	8.33536	chr3	87906321	87916132	9812	+	HAVANA	gene	NA	NA
ENSMUSG00000004929.12	protein_coding	Thop1	4.06751	3.83402	4.01145	5.27999	4.56009	3.97734	3.49234	4.32715	4.72588	5.08354	4.47489	4.97382	4.0369	3.84488	3.98799	3.98957	4.63632	4.83645	4.73205	2.10173	2.5536	4.61682	4.5685	4.96124	4.9423	4.93228	4.33999	2.96805	2.98839	3.33256	3.37931	3.50062	4.8712	5.02182	4.75577	chr10	81070035	81082559	12525	+	HAVANA	gene	NA	NA
ENSMUSG00000004931.10	protein_coding	Apba3	3.64853	4.09919	4.08355	3.08645	3.1895	3.66636	3.60793	3.18533	3.24135	2.85374	3.18993	3.02767	2.927	3.04959	2.89806	3.06657	3.18561	3.30028	3.31783	3.4243	3.52385	2.95404	3.14038	3.22005	3.2733	2.99011	3.5446	3.22258	3.31724	2.90927	3.46967	3.3357	3.33933	3.29166	2.83276	chr10	81268172	81273246	5075	+	ENSEMBL	gene	NA	NA
ENSMUSG00000004933.17	protein_coding	Matk	4.31249	4.97067	5.05351	3.34378	3.59355	3.42193	3.43784	3.91877	3.80067	3.32573	3.2525	2.31717	3.23814	4.12847	4.06489	4.16915	3.39445	3.20251	2.76129	4.6473	4.429	3.15953	3.41425	3.70137	3.65036	3.22605	3.33404	4.07755	4.12373	4.21363	4.25923	4.45138	3.08756	3.34611	3.12055	chr10	81252935	81263365	10431	+	HAVANA	gene	NA	NA
ENSMUSG00000004934.13	protein_coding	Pias4	4.62816	4.75309	4.73766	4.25783	4.44274	4.65617	4.73266	4.51259	4.66306	4.12148	4.54946	4.53664	4.54802	4.5657	4.40092	4.22672	4.54887	4.48177	4.57302	4.65721	4.51803	4.5297	4.71969	4.29263	4.30386	4.33697	4.79819	4.58071	4.67845	4.47661	4.38065	4.71827	4.61506	4.53386	4.39249	chr10	81153266	81167923	14658	-	HAVANA	gene	NA	NA
ENSMUSG00000004936.8	protein_coding	Map2k1	5.77468	6.05785	5.91719	5.53798	5.44272	6.00711	5.63039	5.41218	5.445	5.42864	5.79889	6.02599	5.17056	5.30726	5.48134	5.29387	5.72	5.73782	5.94949	5.47214	5.43898	5.71133	5.53923	5.60266	5.59777	5.52272	5.90368	5.17024	5.50773	5.3001	5.17298	5.41111	5.805	5.67354	5.7607	chr9	64185770	64253631	67862	-	HAVANA	gene	NA	NA
ENSMUSG00000004937.5	protein_coding	Sgta	4.6633	4.64334	4.62941	4.69341	4.6369	4.87921	4.80443	4.62345	4.82325	4.62429	4.82465	5.1268	4.79986	4.37252	4.27028	4.51364	4.99593	4.99086	5.00555	3.97111	4.17114	4.84687	4.90664	4.73005	4.74654	4.88568	5.0432	4.52159	4.60472	4.21363	4.30085	4.42922	5.00009	5.0508	4.67969	chr10	81044075	81060178	16104	-	ENSEMBL	gene	NA	NA
ENSMUSG00000004945.15	protein_coding	Tmem242	4.2262	4.05331	3.99658	4.63389	4.14506	4.90844	4.76623	4.28096	4.38675	4.47447	4.65166	4.79077	4.62807	4.21846	4.2805	4.21965	4.69352	4.8441	4.77673	3.36109	3.34073	4.40306	4.22414	4.54425	4.55461	4.46352	5.05662	4.74233	4.67311	3.7569	3.74765	4.0088	4.67349	4.78118	4.64809	chr17	5410870	5440259	29390	-	HAVANA	gene	NA	NA
ENSMUSG00000004947.15	protein_coding	Dtx2	4.25728	4.14962	4.33664	4.30333	4.49083	3.86257	3.88756	4.34046	4.37809	4.25615	4.16372	3.87664	3.95412	4.61172	4.38837	4.3773	4.29707	3.95853	3.94177	4.77405	4.57249	4.22317	4.33664	4.34347	4.50074	4.09028	3.90825	4.03389	4.11195	4.78004	4.52813	4.72435	4.10537	4.39869	4.16586	chr5	135994800	136032872	38073	+	HAVANA	gene	NA	NA
ENSMUSG00000004980.16	protein_coding	Hnrnpa2b1	9.4066	8.95595	8.93305	9.93422	9.8617	10.2163	9.82257	9.87999	9.79973	10.0483	9.99342	10.1428	9.9024	9.73654	9.7672	9.8026	10.1095	10.0368	10.2243	9.31485	9.44848	9.99535	9.81132	9.83235	9.65061	9.85686	10.3166	9.70914	9.59684	9.58701	9.53716	9.78343	10.0079	9.93059	10.1417	chr6	51460932	51469894	8963	-	HAVANA	gene	NA	NA
ENSMUSG00000004994.12	protein_coding	Ccdc130	3.3436	3.56644	3.5406	2.97177	3.0031	2.75708	3.11204	3.45866	3.34726	3.13249	3.14116	2.89316	3.12287	2.89938	3.11154	3.43957	3.04086	2.86929	3.06623	3.66577	3.42208	3.11832	3.45254	3.1575	2.86537	2.82029	2.91292	3.28486	3.37751	3.14361	3.39477	3.28725	2.76096	3.20591	3.0417	chr8	84257795	84270380	12586	-	HAVANA	gene	NA	NA
ENSMUSG00000004996.9	protein_coding	Mri1	4.98997	5.02138	5.15962	5.14978	5.00303	4.79005	4.55841	4.85252	4.8595	4.74263	4.73071	4.82618	4.57366	5.16224	5.14533	5.01016	4.87752	5.02659	4.85647	4.72781	4.92154	4.78426	4.71069	5.06902	5.17457	5.04453	4.78443	4.48963	4.60752	5.10656	5.15947	5.06815	5.08435	4.84875	4.71569	chr8	84249906	84257326	7421	-	HAVANA	gene	NA	NA
ENSMUSG00000005034.15	protein_coding	Prkacb	7.74526	8.01467	7.93108	7.18176	7.2579	7.76086	7.79753	7.45855	7.34075	7.12106	7.71546	7.46295	7.76082	7.57049	7.58836	7.55491	7.55477	7.45763	7.42902	7.63638	7.71841	7.43367	7.37315	7.26167	7.27592	7.26194	7.67908	7.98747	8.12264	7.56382	7.57655	7.62401	7.29281	7.34714	7.39724	chr3	146729574	146812990	83417	-	HAVANA	gene	NA	NA
ENSMUSG00000005043.13	protein_coding	Sgsh	5.16005	5.41303	5.43552	4.68332	4.77202	4.51155	4.844	4.94805	4.85709	4.26369	4.46904	4.20014	4.46884	5.29762	5.41113	5.44603	4.50292	4.42197	4.40397	5.86213	5.96969	4.67425	5.01175	4.86494	4.84893	5.08059	4.41427	5.1405	5.29389	5.4913	5.49836	5.35455	4.5567	4.65205	4.45122	chr11	119343425	119355536	12112	-	HAVANA	gene	NA	NA
ENSMUSG00000005054.6	protein_coding	Cstb	3.59516	3.60164	3.53375	3.54882	3.3415	3.91288	3.97628	3.25446	3.6287	3.58166	4.07418	4.35192	3.97527	3.32474	3.45012	3.41502	3.87983	3.90468	3.92383	2.56145	2.65802	3.80032	3.64905	3.62123	3.50984	3.42878	4.04533	3.73993	3.78109	3.37002	3.4252	3.3357	3.94382	3.61363	3.89687	chr10	78425670	78427619	1950	+	ENSEMBL	gene	NA	NA
ENSMUSG00000005069.12	protein_coding	Pex5	4.86019	5.14584	5.15405	4.11503	4.53737	4.50038	4.75513	4.66213	4.46044	4.24385	4.54322	4.37602	4.48553	5.14774	4.89787	4.77956	4.12254	4.093	4.10357	5.52896	5.25142	4.28033	4.47858	4.50012	4.35118	4.19128	4.47176	4.85153	4.84424	5.10285	5.17298	5.21353	3.96269	4.30557	3.9235	chr6	124396816	124415067	18252	-	HAVANA	gene	NA	NA
ENSMUSG00000005078.16	protein_coding	Jkamp	3.55683	3.93868	3.73522	3.16973	3.36749	3.21026	3.05886	3.09399	3.06901	3.02161	3.19525	3.4521	2.77454	3.43806	3.46811	3.38373	3.26322	3.4177	3.37179	3.25207	3.63607	3.58817	3.30489	3.35004	3.13036	3.49237	3.22281	3.50432	3.05552	3.39446	3.08748	3.3515	3.21893	3.17616	3.33414	chr12	72085589	72101461	15873	+	HAVANA	gene	NA	NA
ENSMUSG00000005087.17	protein_coding	Cd44	6.25327	6.36537	6.47797	6.54269	6.40556	6.76262	6.82227	6.22646	6.71951	6.25242	6.73516	7.14706	6.81934	5.1766	5.40711	5.64479	5.78244	6.04873	6.36908	4.59332	5.03578	6.39585	6.44859	5.87951	5.87312	6.29519	6.44408	6.48368	6.61179	5.33209	5.29745	5.50591	5.89125	5.76382	6.00265	chr2	102811141	102901665	90525	-	HAVANA	gene	NA	NA
ENSMUSG00000005102.13	protein_coding	Eif2ak4	4.73724	4.91345	4.95571	4.95054	4.72499	4.67573	4.11301	4.52663	4.68255	4.99643	4.4727	4.71933	4.56903	4.7024	4.64455	4.60874	4.34978	4.59942	4.76468	4.40636	4.24378	4.35319	4.47327	4.96734	4.89395	4.85081	4.72805	4.27458	4.0881	4.27416	4.3333	4.1778	4.53537	4.23518	4.34073	chr2	118388618	118475234	86617	+	HAVANA	gene	NA	NA
ENSMUSG00000005103.12	protein_coding	Wdr1	8.76573	8.82731	8.74912	8.56823	8.50916	8.87891	8.77198	8.60876	8.67069	8.57435	9.05956	9.28482	8.64652	8.51833	8.43992	8.51466	9.02452	9.01291	8.9945	8.49875	8.49679	9.06437	9.00044	8.59436	8.58301	8.5826	8.85006	8.75699	8.83629	8.48384	8.49784	8.48956	9.00871	8.99444	8.96815	chr5	38526813	38563221	36409	-	HAVANA	gene	NA	NA
ENSMUSG00000005107.13	protein_coding	Slc2a9	3.45746	3.37964	3.62679	3.42352	3.30161	3.76552	3.60793	3.44887	3.49483	2.87781	3.24226	3.01409	3.50851	3.85	3.69388	3.45772	3.2072	3.11036	2.83995	3.64602	3.5177	2.94734	3.14707	3.35625	3.43747	3.45803	3.4017	4.12372	3.95818	3.51082	3.94955	3.63576	3.12154	3.30547	2.8139	chr5	38349273	38503143	153871	-	HAVANA	gene	NA	NA
ENSMUSG00000005125.12	protein_coding	Ndrg1	3.73797	3.41954	3.43063	3.08645	3.52591	6.20263	4.41058	4.09552	4.1654	3.53195	4.33974	4.47105	4.55505	4.08564	3.72913	3.63296	3.91523	3.91924	3.79939	4.92647	4.35843	3.63484	3.38626	3.40493	2.99021	2.92456	5.41021	4.33796	4.08405	4.28727	4.54208	4.39913	3.81476	3.79095	3.86973	chr15	66929321	66969640	40320	-	HAVANA	gene	NA	NA
ENSMUSG00000005142.10	protein_coding	Man2b1	7.29909	7.44045	7.47945	6.8214	6.95345	7.26925	7.34339	7.1501	7.07391	6.74489	7.2041	7.13338	7.07452	7.27357	7.04795	7.23236	7.22652	7.12196	7.11901	7.28906	7.25989	7.1425	7.15789	6.94213	6.92166	6.87688	7.25161	7.46399	7.50027	7.21591	7.22094	7.13413	7.106	7.15843	6.9922	chr8	85083270	85098282	15013	+	HAVANA	gene	NA	NA
ENSMUSG00000005150.16	protein_coding	Wdr83	4.05274	4.23634	4.05689	3.74784	3.57158	4.19776	4.0728	3.81249	3.74224	4.08151	4.03754	3.82631	3.89111	3.883	4.1841	3.85416	4.17872	4.09438	4.05275	3.97402	3.80748	3.96694	4.09357	4.02292	4.25615	3.93512	4.17996	3.98024	3.91852	3.71355	3.94231	3.85451	3.99852	4.18751	3.62427	chr8	85075035	85081306	6272	-	HAVANA	gene	NA	NA
ENSMUSG00000005161.15	protein_coding	Prdx2	5.91689	6.17597	6.3803	5.67156	5.58798	6.0896	5.83931	5.50249	5.55089	5.68657	5.75451	5.83056	5.82484	5.35121	5.3724	5.4179	5.75825	5.82923	5.77226	4.45992	4.54833	5.48914	5.39361	5.61299	5.69963	5.65742	6.14874	5.96994	5.85138	5.06147	5.10881	5.07739	5.59426	5.6493	5.61843	chr8	84969587	84974834	5248	+	HAVANA	gene	NA	NA
ENSMUSG00000005198.15	protein_coding	Polr2a	7.27947	5.76492	5.95099	8.55952	8.59589	8.86845	8.89404	8.60215	8.676	8.57126	8.63925	8.77571	8.99703	8.62614	8.64482	8.69661	8.67291	8.75071	8.7891	8.69771	8.62257	8.60852	8.74636	8.56085	8.5153	8.61397	8.93972	8.82654	8.80173	8.60497	8.63026	8.6598	8.74277	8.75539	8.74553	chr11	69733997	69758637	24641	-	HAVANA	gene	NA	NA
ENSMUSG00000005204.12	protein_coding	Senp3	6.08349	5.84115	5.88795	6.64083	6.31328	6.24498	5.92849	6.26675	6.31996	6.47654	6.45216	6.6767	6.137	6.17577	6.253	6.12529	6.56283	6.62278	6.68311	5.93652	5.89816	6.44668	6.37503	6.42957	6.54485	6.49115	6.27069	5.79556	5.73462	6.10276	5.99468	6.04688	6.66236	6.59	6.47883	chr11	69673115	69682084	8970	-	HAVANA	gene	NA	NA
ENSMUSG00000005233.16	protein_coding	Spc25	3.52991	2.69098	2.70313	4.46516	3.09931	5.6299	5.54271	4.35365	4.73099	4.6361	5.58561	5.7345	5.88198	3.04959	3.32405	3.62763	5.64026	5.48123	5.51973	0.951287	1.81577	5.23619	4.94167	3.91391	3.76233	4.17728	5.59629	5.5013	5.32085	1.78628	1.83502	2.18224	5.44125	5.36287	5.48182	chr2	69193895	69206194	12300	-	HAVANA	gene	NA	NA
ENSMUSG00000005262.12	protein_coding	Ufd1l	5.65512	5.71313	5.62429	5.51769	5.50844	5.6374	5.52974	5.58316	5.67818	5.65331	5.58763	5.61923	5.5021	5.66534	5.7228	5.64611	5.71749	5.67702	5.56443	5.69357	5.76809	5.68435	5.74386	5.56567	5.64527	5.6061	5.64405	5.62281	5.64074	5.65652	5.58709	5.68489	5.76793	5.72839	5.67968	chr16	18811779	18835261	23483	+	HAVANA	gene	NA	NA
ENSMUSG00000005267.13	protein_coding	Zfp287	4.72162	4.5473	4.45916	4.48155	4.81275	5.18922	5.28541	4.65575	4.3362	3.96172	4.75071	4.45102	4.87115	4.93738	4.96699	5.04057	4.84577	4.8668	4.83358	5.84274	5.87307	4.92235	5.31562	4.66408	4.51998	4.87487	5.1328	5.28473	5.41012	5.19618	5.37744	5.1741	4.61506	4.80568	4.78511	chr11	62700356	62731905	31550	-	HAVANA	gene	NA	NA
ENSMUSG00000005299.6	protein_coding	Letm1	5.86669	5.54067	5.56927	6.37546	6.3299	5.93794	5.91857	6.17983	6.34185	6.36031	6.16761	6.39626	5.94496	6.1727	6.20016	6.15433	6.2869	6.26004	6.2717	6.08939	5.9698	6.22682	6.22035	6.35178	6.264	6.27889	6.17375	5.81796	5.72047	6.08598	6.14394	6.12018	6.32772	6.42272	6.19711	chr5	33739673	33782817	43145	-	HAVANA	gene	NA	NA
ENSMUSG00000005312.14	protein_coding	Ubqln1	6.62677	6.56102	6.54506	6.93714	6.947	6.5486	6.30097	6.62319	6.72721	6.85763	6.85468	7.04764	6.42324	6.64571	6.64648	6.63084	6.94166	6.8506	6.88814	6.22427	6.41857	6.99256	6.81997	6.8324	6.8676	6.85835	6.59884	6.24261	6.13746	6.55032	6.5991	6.69911	6.88518	6.88374	6.93553	chr13	58176156	58215653	39498	-	ENSEMBL	gene	NA	NA
ENSMUSG00000005354.15	protein_coding	Txn2	5.59929	5.09837	5.13155	6.5371	6.47445	5.68883	5.46308	6.2744	6.30118	6.47456	6.16083	6.28332	5.79548	6.23381	6.18029	6.25114	6.14034	6.29604	6.19671	5.44952	5.58888	6.1235	6.138	6.40435	6.4164	6.44807	5.70375	5.35415	5.3378	6.11016	6.09273	6.09928	6.25687	6.29011	6.1109	chr15	77915047	77929006	13960	-	HAVANA	gene	NA	NA
ENSMUSG00000005362.14	protein_coding	Crbn	6.32715	6.58504	6.5359	5.80682	6.11744	6.13134	6.54773	6.14456	6.00182	5.91937	5.9673	5.82037	6.28707	6.27487	6.32976	6.27315	5.78923	5.78186	5.85062	6.28267	6.35106	5.85325	5.80215	5.98382	6.08189	5.95282	6.04243	6.62881	6.75679	6.34782	6.27852	6.42474	5.74928	5.67098	5.75242	chr6	106780201	106800077	19877	-	HAVANA	gene	NA	NA
ENSMUSG00000005370.3	protein_coding	Msh6	6.77627	6.249	6.3687	7.66959	7.31662	7.58779	7.04374	7.29455	7.37653	7.80124	7.31116	7.46856	7.39788	7.01908	7.13406	7.14921	7.6226	7.58063	7.45456	6.26045	6.39693	7.31395	7.27736	7.4801	7.47845	7.56256	7.61087	7.07942	6.89673	6.62839	6.64507	6.53761	7.4271	7.52438	7.45087	chr17	87975050	87990883	15834	+	ENSEMBL	gene	NA	NA
ENSMUSG00000005371.14	protein_coding	Fbxo11	5.93623	5.62364	5.74037	6.119	6.37705	5.9984	6.00077	6.24002	6.21986	6.31474	6.17974	6.03359	6.25119	6.30463	6.35243	6.252	6.02657	5.83794	5.988	6.4075	6.45284	6.09419	6.08935	6.24886	6.33363	6.22885	6.0198	6.2091	6.25458	6.47782	6.50609	6.38673	5.91324	5.92007	6.05579	chr17	87990859	88065291	74433	-	HAVANA	gene	NA	NA
ENSMUSG00000005374.13	protein_coding	Tbl2	4.98494	4.72942	4.85905	5.4479	4.96522	5.90414	5.30457	4.8783	5.03926	5.06269	5.45091	5.52421	5.17666	4.87081	4.73155	4.92142	5.66776	5.63905	5.70452	4.45258	4.40919	5.47877	5.39079	5.22966	5.17254	5.34152	5.64532	4.59989	4.82993	4.65916	4.68095	4.52983	5.72437	5.51025	5.67707	chr5	135149657	135165760	16104	+	HAVANA	gene	NA	NA
ENSMUSG00000005378.17	protein_coding	Wbscr22	4.77387	4.80162	4.64919	5.09672	4.90731	4.66366	4.14356	4.75727	4.89698	5.18159	5.02313	5.24986	4.77257	4.75064	4.79304	4.71693	5.03107	5.25134	5.07535	4.19506	4.14741	4.95611	5.00298	4.91787	5.0208	4.96831	4.90965	4.27649	4.18077	4.64273	4.77255	4.57762	5.18017	5.14212	5.11284	chr5	135052957	135064959	12003	-	HAVANA	gene	NA	NA
ENSMUSG00000005410.5	protein_coding	Mcm5	7.10384	6.35165	6.39538	8.40818	7.95827	8.33892	7.85911	7.86306	8.04445	8.35909	8.16283	8.52331	8.11131	7.49965	7.66186	7.57997	8.41124	8.52945	8.44571	5.49624	5.86218	8.20225	8.11712	8.17396	8.18395	8.14042	8.51604	7.62613	7.22072	6.75177	6.67545	6.82324	8.42458	8.38055	8.34196	chr8	75109528	75128439	18912	+	ENSEMBL	gene	NA	NA
ENSMUSG00000005413.7	protein_coding	Hmox1	3.36749	5.33988	4.87674	1.48387	0.467528	2.59191	2.86593	0.694356	1.83552	1.1382	2.57468	3.77158	2.46149	0.0196965	0.872002	0.873513	1.6991	2.14447	2.095	0.31413	0.164834	3.15372	3.28077	1.24921	1.73782	1.62881	2.82604	1.75994	1.68306	0.824538	-0.188709	0.128326	1.86322	2.26342	1.77546	chr8	75093591	75100596	7006	+	HAVANA	gene	NA	NA
ENSMUSG00000005417.17	protein_coding	Mprip	6.46744	6.71172	6.66607	6.27491	6.03497	6.17667	6.24933	6.22881	6.26255	6.36169	6.37706	6.35885	6.20808	6.2402	6.15758	6.23339	6.16156	6.12431	6.24986	6.6188	6.59131	6.34521	6.36593	6.30786	6.3082	6.30125	6.29789	6.02466	5.95725	6.11877	6.17949	6.11227	6.19895	6.27722	6.16687	chr11	59661305	59780860	119556	+	HAVANA	gene	NA	NA
ENSMUSG00000005442.13	protein_coding	Cic	7.20254	6.81739	6.85402	7.2517	7.37464	7.65306	7.79618	7.68645	7.61184	7.27288	7.51685	7.38792	7.59629	7.74649	7.63158	7.61644	7.47361	7.35396	7.39229	8.02462	7.9325	7.43576	7.55761	7.53273	7.53432	7.35857	7.69572	7.64274	7.70687	7.74106	7.88095	7.67512	7.39098	7.49606	7.25244	chr7	25267704	25294159	26456	+	HAVANA	gene	NA	NA
ENSMUSG00000005465.9	protein_coding	Il27ra	7.20095	7.556	7.4839	6.90668	7.0846	6.21271	6.453	7.15237	7.08094	6.90281	6.84752	6.62794	6.35296	7.25726	7.18889	7.16953	6.65275	6.67518	6.62209	7.50548	7.41282	6.753	6.74647	7.13077	7.01278	7.03277	6.33109	6.57444	6.44264	7.34143	7.27728	7.1824	6.75998	6.79843	6.73335	chr8	84030294	84042589	12296	-	HAVANA	gene	NA	NA
ENSMUSG00000005469.10	protein_coding	Prkaca	5.07619	4.9389	4.92595	5.51996	5.00716	5.61857	5.51994	5.13203	5.28038	5.22006	5.216	5.36746	5.23479	5.26756	5.29732	5.26668	5.3137	5.26606	5.44116	4.7801	4.57841	5.17003	5.08437	5.36499	5.30047	5.27404	5.72792	5.09112	5.09816	4.70386	4.97123	5.08714	5.35818	5.21343	5.26638	chr8	83972993	83996443	23451	+	HAVANA	gene	NA	NA
ENSMUSG00000005470.8	protein_coding	Asf1b	4.62795	3.80914	3.91461	5.5591	4.60994	6.5677	6.27788	5.5002	5.59742	5.50147	6.38567	6.58953	6.32167	4.58736	4.63397	4.94733	6.59183	6.54043	6.43392	2.47453	2.89491	6.07663	5.91032	5.05383	4.85912	5.40599	6.68899	5.89319	5.72692	3.33256	3.41006	3.4428	6.29273	6.40359	6.09732	chr8	83955507	83970197	14691	+	HAVANA	gene	NA	NA
ENSMUSG00000005481.17	protein_coding	Ddx39	6.82887	6.73542	6.71564	7.35174	6.85287	7.05185	6.50724	6.82332	7.0534	7.14403	7.19509	7.59917	6.85782	6.60303	6.6496	6.60191	7.41548	7.53207	7.47918	6.19707	6.18273	7.21357	7.18096	7.03839	7.0824	7.16451	7.19668	6.46445	6.17274	6.33807	6.42069	6.41028	7.39883	7.34628	7.30514	chr8	83715177	83726892	11716	+	HAVANA	gene	NA	NA
ENSMUSG00000005483.9	protein_coding	Dnajb1	5.93466	5.88229	6.11653	6.01021	5.86157	6.02438	5.65449	5.69928	5.74625	5.86783	6.04114	5.96111	5.5357	5.87231	5.8159	5.91374	6.02151	5.88226	5.9645	5.7111	5.83025	6.01782	5.86338	5.92925	5.82235	5.90694	5.98513	5.42499	5.45587	5.87419	5.90577	5.91756	6.08884	6.14983	6.08164	chr8	83608175	83611902	3728	+	ENSEMBL	gene	NA	NA
ENSMUSG00000005501.14	protein_coding	Usp40	5.65965	5.75648	5.68427	5.52562	5.76952	5.50564	5.48676	5.58651	5.49495	5.5334	5.20945	5.18099	5.43501	5.99776	5.86426	5.77471	5.28354	5.28023	5.41698	5.91192	6.06257	5.40358	5.27957	5.74536	5.81717	5.65744	5.54688	5.75702	5.76502	6.01287	5.96651	6.00755	5.3794	5.17634	5.33081	chr1	87945119	88008551	63433	-	HAVANA	gene	NA	NA
ENSMUSG00000005505.12	protein_coding	Kbtbd4	4.56319	4.59107	4.60223	4.69898	4.38975	4.58341	4.38178	4.66075	4.60143	4.80039	4.72058	4.67944	4.49893	4.52831	4.51933	4.61726	4.51436	4.51154	4.58985	4.26014	4.20156	4.64516	4.34884	4.67885	4.70306	4.64037	4.51192	4.34486	4.30041	4.28407	4.31936	4.17247	4.59862	4.86203	4.78366	chr2	90904740	90911626	6887	+	HAVANA	gene	NA	NA
ENSMUSG00000005506.16	protein_coding	Celf1	7.81022	7.48884	7.57197	8.25211	8.15485	8.07417	7.83295	8.05592	8.02428	8.17664	8.18789	8.12364	8.00802	8.06368	7.9764	8.07865	8.20634	8.13031	8.18934	8.05802	8.0539	8.09044	8.04198	8.1614	8.19397	8.13749	8.11258	7.98955	7.94595	8.05461	8.03255	8.11353	8.13076	8.07474	8.15465	chr2	90940382	91019497	79116	+	HAVANA	gene	NA	NA
ENSMUSG00000005510.9	protein_coding	Ndufs3	5.53865	5.47754	5.46377	5.74281	5.63044	5.77898	5.55486	5.59835	5.60599	5.70289	5.72253	5.9653	5.62292	5.45556	5.54864	5.49129	5.87906	5.82465	5.88442	4.98708	5.12958	5.68771	5.55133	5.74973	5.80832	5.59602	5.82227	5.57168	5.4143	5.2431	5.15039	5.23071	5.81716	5.85253	5.79235	chr2	90894634	90904827	10194	-	HAVANA	gene	NA	NA
ENSMUSG00000005514.14	protein_coding	Por	5.20846	4.98407	5.09829	5.17015	5.19307	5.69484	5.386	5.11818	5.2283	4.91734	5.80325	6.1304	5.39635	4.966	4.95641	5.03656	5.76678	5.96877	5.95215	4.9292	5.07613	5.93886	5.95196	5.02881	5.13767	5.26248	5.6952	5.16841	5.25633	4.84799	5.03181	4.84642	5.70489	5.8417	5.62122	chr5	135670033	135735326	65294	+	HAVANA	gene	NA	NA
ENSMUSG00000005533.10	protein_coding	Igf1r	5.68671	4.86718	5.07253	6.60708	7.2631	5.21785	5.96509	6.78039	6.66088	6.77992	5.71344	4.73804	6.19222	7.84289	7.6586	7.59713	5.40058	5.25463	5.05915	7.95642	7.55259	5.36131	5.96999	6.82906	6.97376	6.64916	5.22397	6.20732	6.03515	7.78851	7.88916	7.74181	5.14756	5.4679	5.38931	chr7	67952827	68233668	280842	+	HAVANA	gene	NA	NA
ENSMUSG00000005534.10	protein_coding	Insr	5.8987	5.88765	5.94391	5.77398	6.05991	5.89269	5.97229	6.03918	5.76963	5.8012	5.50866	5.05731	6.01129	6.33146	6.13595	6.2546	5.1168	4.93644	5.08037	6.99194	6.91179	5.64551	5.7036	6.00817	6.05891	5.92696	5.78431	6.2923	6.28898	6.52425	6.5499	6.4938	4.97243	5.11101	5.20619	chr8	3122061	3279617	157557	-	HAVANA	gene	NA	NA
ENSMUSG00000005566.14	protein_coding	Trim28	7.7317	7.52921	7.63049	8.26113	7.90491	8.09179	7.77504	7.89949	8.06383	8.26658	8.01783	8.21682	7.83305	7.65716	7.75275	7.67448	8.15797	8.18911	8.15744	7.00492	7.15722	7.93659	7.88384	8.11231	8.19721	8.08548	8.21593	7.60662	7.43362	7.43424	7.48021	7.49662	8.18148	8.14265	7.98537	chr7	12999114	13031035	31922	+	HAVANA	gene	NA	NA
ENSMUSG00000005575.16	protein_coding	Ube2m	5.66343	5.36229	5.43698	6.17982	5.85469	6.10683	5.66045	5.73298	6.01503	6.02789	6.17772	6.54063	5.9333	5.57531	5.73894	5.71687	6.30286	6.3859	6.38426	4.93464	5.17526	6.32129	6.30575	5.95195	5.95198	6.1278	6.23657	5.47185	5.41492	5.28057	5.44211	5.50944	6.52311	6.36125	6.32915	chr7	13035120	13038275	3156	-	HAVANA	gene	NA	NA
ENSMUSG00000005583.16	protein_coding	Mef2c	3.56198	7.00903	6.87637	0.512799	0.145745	0.468005	-1.73063	0.401096	1.06836	0.0919298	-0.383067	-0.357577	-1.19787	1.46126	0.305438	-1.63678	1.50363	-0.970371	-1.82275	3.44731	3.3615	2.32691	-1.74898	3.33756	1.50012	-1.4844	2.36584	2.07395	-3.43125	-0.171904	-0.614416	-0.0263851	-0.147044	-1.4142	-1.43336	chr13	83504034	83667080	163047	+	HAVANA	gene	NA	NA
ENSMUSG00000005609.16	protein_coding	Ctr9	6.05666	6.13797	6.15441	6.15521	5.735	6.09053	5.99607	5.81726	5.95293	5.99892	5.99386	6.18067	5.91883	5.90594	5.83798	5.91921	6.0103	6.08389	6.11681	5.74554	5.69497	5.81445	5.88654	6.04511	6.11799	6.07213	6.10347	5.96574	5.92839	5.88717	6.01483	5.74891	6.04966	6.02185	6.13769	chr7	111028951	111056377	27427	+	HAVANA	gene	NA	NA
ENSMUSG00000005610.17	protein_coding	Eif4g2	9.60531	9.15587	9.21296	10.34	10.0373	9.99355	9.59613	9.99974	10.1404	10.2941	10.1705	10.5299	9.94552	9.81019	9.89241	9.91366	10.285	10.3844	10.3855	9.49655	9.62691	10.2489	10.1292	10.1175	10.1885	10.2075	10.0593	9.57184	9.47055	9.69015	9.70404	9.70377	10.3159	10.2333	10.3564	chr7	111067750	111083030	15281	-	HAVANA	gene	NA	NA
ENSMUSG00000005615.14	protein_coding	Pcyt1a	4.56221	4.68772	4.83279	4.39519	4.11469	5.33932	5.48676	4.06384	4.29076	4.46126	4.31552	4.56719	5.42095	3.98666	3.96705	4.16179	3.97517	4.34829	4.30835	3.72973	3.90959	3.96545	3.79242	4.15711	4.41425	4.36194	5.31771	5.85492	5.78123	3.70898	3.85213	3.88402	3.88569	3.975	3.86057	chr16	32430921	32475070	44150	+	HAVANA	gene	NA	NA
ENSMUSG00000005621.11	protein_coding	Zfp592	6.99681	6.78234	6.92424	6.97112	7.09728	6.9694	7.15562	7.23735	7.17086	7.14109	7.03532	6.78315	7.09318	7.35834	7.33332	7.24852	6.87804	6.83773	6.74267	7.77773	7.62595	6.93566	7.03304	7.1483	7.20338	6.99485	7.11031	7.37335	7.3989	7.37713	7.45923	7.38016	6.8615	6.89634	6.86171	chr7	80993681	81045164	51484	+	HAVANA	gene	NA	NA
ENSMUSG00000005625.15	protein_coding	Psmd4	6.43001	6.5751	6.59647	6.35971	6.28799	6.29484	6.18786	6.1931	6.32898	6.38011	6.35273	6.52035	6.22274	6.17066	6.2091	6.15988	6.35858	6.56551	6.45969	5.83258	5.96189	6.37476	6.39202	6.19883	6.40005	6.35161	6.35534	6.17753	6.21567	6.08785	5.92453	6.16779	6.46309	6.46946	6.35057	chr3	95032694	95042614	9921	-	HAVANA	gene	NA	NA
ENSMUSG00000005656.8	protein_coding	Snx6	5.58886	5.72423	5.71275	5.45385	5.288	5.70082	5.42855	5.32515	5.39326	5.46618	5.73459	5.83159	5.45145	5.24633	5.44091	5.35323	5.67553	5.56808	5.71604	5.0393	5.11334	5.53466	5.28867	5.35574	5.3479	5.41347	5.67546	5.48812	5.53592	5.19965	5.32596	5.41488	5.55442	5.58857	5.74585	chr12	54746349	54795703	49355	-	ENSEMBL	gene	NA	NA
ENSMUSG00000005667.8	protein_coding	Mthfd2	5.47783	4.9589	4.64856	6.75889	6.24306	6.53795	6.28755	6.25626	6.3852	6.54454	6.74698	7.14082	6.52532	5.54875	5.65241	5.80691	6.61422	6.80626	6.91791	4.07817	4.42572	6.35335	6.18424	6.3283	6.38	6.47837	6.70795	5.82496	5.59352	5.25743	5.13206	5.30154	6.67099	6.66019	6.71187	chr6	83305691	83325908	20218	-	HAVANA	gene	NA	NA
ENSMUSG00000005674.9	protein_coding	Tomm40l	4.48231	4.65509	4.43071	4.60974	4.48526	4.20592	4.04088	4.49977	4.35456	4.40372	4.57654	4.54183	4.06934	4.44244	4.64856	4.47536	4.69303	4.66141	4.68012	4.06405	3.9915	4.46013	4.36974	4.47035	4.60019	4.51286	4.45347	4.07919	4.06095	4.32273	4.2599	4.57075	4.58651	4.75551	4.54882	chr1	171216011	171222514	6504	-	HAVANA	gene	NA	NA
ENSMUSG00000005682.8	protein_coding	Pan2	5.42097	5.63572	5.63713	4.9165	4.86842	5.42704	5.52648	5.49902	5.47375	5.10239	5.27873	4.99472	5.55806	5.19687	5.07857	5.03454	4.85263	4.97178	5.02925	5.60937	5.51201	5.11123	5.29921	5.07655	5.07833	5.02902	5.56309	5.64012	5.53739	5.25075	5.21277	5.11054	5.00009	4.80081	4.93663	chr10	128303335	128321358	18024	+	ENSEMBL	gene	NA	NA
ENSMUSG00000005683.7	protein_coding	Cs	7.38925	7.03018	7.07958	7.95033	7.62884	8.05493	7.69378	7.6519	7.81831	7.85554	7.96335	8.28433	7.73884	7.43926	7.56555	7.53475	8.04565	8.14722	8.14491	6.70267	6.8166	7.90643	7.85784	7.73488	7.7892	7.82081	8.15909	7.68825	7.57867	7.17416	7.2446	7.2119	8.02589	7.96429	7.96307	chr10	128337832	128362479	24648	+	ENSEMBL	gene	NA	NA
ENSMUSG00000005686.16	protein_coding	Ampd3	3.35316	4.07643	4.14755	2.59299	3.01959	1.4804	2.09257	2.59173	2.5518	2.81095	1.86907	1.22521	1.786	3.43867	3.26777	2.91722	2.41666	2.35667	1.74126	3.84175	3.3615	2.22544	2.19588	3.23789	3.15888	2.99571	2.00365	2.35767	2.27661	3.5059	3.2662	3.38258	2.05126	2.67857	2.32087	chr7	110768206	110812405	44200	+	HAVANA	gene	NA	NA
ENSMUSG00000005687.14	protein_coding	Bcas2	5.90415	5.99801	5.9625	5.945	5.95239	5.78651	5.59034	5.93248	6.07054	6.07551	5.96845	6.02345	5.83167	5.89977	5.73771	5.86472	5.87749	5.98789	5.97586	5.6313	5.65907	5.76381	5.74386	5.85891	5.76705	5.94049	5.9174	5.57653	5.42606	5.70618	5.67834	5.64058	5.89862	5.87911	5.89012	chr3	103171655	103179166	7512	+	HAVANA	gene	NA	NA
ENSMUSG00000005696.11	protein_coding	Sh2d1a	4.81591	4.92183	4.91728	5.25212	4.54263	5.57503	5.50838	4.29972	4.30947	5.11413	4.82047	4.99101	5.54551	4.02725	4.09029	4.14979	4.06124	3.88453	4.3382	5.15068	4.98752	4.47753	4.51178	5.0692	5.12522	5.29851	5.71526	6.04432	6.02752	4.54453	4.33226	4.48313	3.2183	3.60361	3.69317	chrX	42502453	42529330	26878	+	HAVANA	gene	NA	NA
ENSMUSG00000005698.15	protein_coding	Ctcf	7.48936	7.17021	7.26531	7.75515	7.43659	8.09957	7.96118	7.75339	7.79455	7.71676	7.91042	7.96449	7.94764	7.48146	7.56647	7.63772	8.06064	7.95414	7.98821	7.3707	7.5462	7.89565	7.86989	7.6138	7.46722	7.69462	8.09088	7.98135	7.94779	7.36094	7.40784	7.36664	7.8738	7.88892	7.94584	chr8	105636568	105682922	46355	+	HAVANA	gene	NA	NA
ENSMUSG00000005718.7	protein_coding	Tfap4	3.92747	3.53946	3.72324	4.77926	4.40558	3.93334	3.00364	4.50552	4.50091	4.90372	4.24033	4.20125	3.98225	4.42502	4.65768	4.44557	4.40062	4.52047	4.31663	4.14537	4.3653	4.15203	4.15948	4.60541	4.71627	4.52009	3.97033	3.0014	2.44141	4.36354	3.89624	4.26378	4.29598	4.53386	4.50258	chr16	4544661	4559720	15060	-	ENSEMBL	gene	NA	NA
ENSMUSG00000005732.14	protein_coding	Ranbp1	6.22956	5.69804	5.7426	7.43752	6.85123	6.96543	5.89853	6.67349	6.94454	7.3441	7.18551	7.58625	6.80465	6.38897	6.61115	6.66313	7.43678	7.61653	7.6704	4.82471	5.26802	7.32078	7.24578	6.97626	7.00426	7.2607	7.13898	5.3182	5.12965	5.91278	5.89765	6.07332	7.34768	7.48245	7.36198	chr16	18239784	18248732	8949	-	HAVANA	gene	NA	NA
ENSMUSG00000005763.15	protein_coding	Cd247	7.66002	7.70427	7.65799	7.53197	7.73373	7.88326	7.87155	7.6605	7.57819	7.58207	7.33609	7.38512	7.46459	7.57563	7.60213	7.65665	7.56297	7.64933	7.52289	7.79175	7.73407	7.55788	7.70605	7.5203	7.57234	7.5763	7.78682	8.1953	8.23759	7.54913	7.52819	7.64309	7.48001	7.53015	7.43967	chr1	165788681	165877277	88597	+	HAVANA	gene	NA	NA
ENSMUSG00000005774.12	protein_coding	Rfx5	5.30353	5.67251	5.71199	4.63995	4.62246	5.10246	5.15485	4.74251	4.77284	4.88547	4.89927	4.86459	5.2998	4.80621	5.02051	4.96182	4.84948	4.88098	4.82682	4.5582	4.65733	5.10386	5.03015	4.92603	5.15055	4.80157	5.18481	5.67556	5.53742	4.56572	4.6317	4.86822	4.66251	4.77767	4.81273	chr3	94954075	94961561	7487	+	HAVANA	gene	NA	NA
ENSMUSG00000005779.12	protein_coding	Psmb4	6.66016	6.53696	6.54761	6.90495	6.75236	7.16846	6.80757	6.59348	6.72465	6.85763	7.04713	7.31675	6.96649	6.52745	6.57355	6.48069	7.22476	7.27517	7.2276	5.74399	5.7616	7.01959	6.91166	6.81731	6.74689	6.78001	7.35879	6.63812	6.434	6.27391	6.30601	6.27106	7.16727	7.10909	7.10897	chr3	94884093	94886961	2869	-	HAVANA	gene	NA	NA
ENSMUSG00000005802.12	protein_coding	Slc30a4	5.48795	4.84532	4.78889	5.76348	5.7499	6.79483	5.84979	5.88876	6.00452	6.32864	6.36871	6.63128	6.63954	6.02975	6.08049	5.96433	7.10579	7.03734	6.85253	4.88775	5.26985	6.3342	6.09714	5.85673	5.95198	5.78758	6.59425	5.74599	5.54471	5.81431	5.92447	5.80161	6.76532	6.7613	6.8548	chr2	122681233	122702663	21431	-	HAVANA	gene	NA	NA
ENSMUSG00000005804.14	protein_coding	Bloc1s6	4.5544	4.48896	4.42995	4.61491	4.56009	4.74448	4.66309	4.64292	4.61777	4.69826	4.68418	4.8702	4.77194	4.57502	4.55198	4.69794	4.77286	4.76572	4.73822	4.3787	4.55155	4.62735	4.47327	4.63121	4.62739	4.61145	4.75181	4.62151	4.74351	4.60783	4.50694	4.48757	4.83582	4.68938	4.66398	chr2	122738503	122749475	10973	+	HAVANA	gene	NA	NA
ENSMUSG00000005813.12	protein_coding	Metap1	5.99708	5.79811	5.97646	6.59421	6.36258	5.68763	5.42154	6.24002	6.2445	6.53889	6.04041	6.21595	5.72338	6.22792	6.21888	6.20802	6.24491	6.19797	6.1847	5.77312	5.93212	6.26171	6.07803	6.3961	6.40954	6.44662	5.8117	5.65461	5.54325	6.15198	6.01983	6.11787	6.08669	6.1071	6.27846	chr3	138458956	138489515	30560	-	HAVANA	gene	NA	NA
ENSMUSG00000005823.8	protein_coding	Gpr108	4.73309	4.91111	4.91149	4.24417	4.32165	4.73286	4.86765	4.60813	4.58426	4.3423	4.72704	4.61971	4.9101	4.43529	4.41645	4.44254	4.48551	4.49154	4.49008	4.53365	4.50875	4.60195	4.50485	4.48604	4.27016	4.29219	4.75416	4.90978	5.02049	4.63372	4.4265	4.59099	4.58493	4.73091	4.188	chr17	57234914	57247641	12728	-	ENSEMBL	gene	NA	NA
ENSMUSG00000005846.11	protein_coding	Rsl1d1	6.93722	6.57731	6.68181	7.9223	7.53017	7.03475	6.53318	7.16738	7.48543	7.87036	7.33726	7.82132	7.04524	7.05505	7.24476	7.13659	7.59011	7.71471	7.696	5.98056	6.24501	7.51615	7.29139	7.57023	7.6245	7.77447	7.11444	6.45011	6.30286	6.9053	6.86358	6.8856	7.77746	7.59354	7.75638	chr16	11192970	11203331	10362	-	HAVANA	gene	NA	NA
ENSMUSG00000005871.14	protein_coding	Apc	7.10198	6.93679	7.03029	7.18998	7.365	7.03096	7.12899	7.1863	7.11979	7.04381	7.11037	7.00408	7.31731	7.42472	7.30231	7.42643	7.06006	7.02014	7.02701	7.52859	7.47092	7.15091	7.16078	7.20008	7.18189	7.23811	6.96488	7.23605	7.26083	7.53112	7.54486	7.47875	7.08678	7.08026	7.18157	chr18	34220924	34322189	101266	+	HAVANA	gene	NA	NA
ENSMUSG00000005873.5	protein_coding	Reep5	5.60066	5.37676	5.34511	5.40189	5.39928	6.54992	6.60913	5.7259	5.76465	5.67408	6.52578	6.80845	6.63954	5.43048	5.31897	5.34025	6.10723	6.13233	6.21748	5.17413	5.00311	6.10629	6.1126	5.44573	5.27048	5.41795	6.62802	6.22065	6.24472	5.24068	5.36179	5.10589	6.00485	5.89518	6.01509	chr18	34344889	34373415	28527	-	ENSEMBL	gene	NA	NA
ENSMUSG00000005881.13	protein_coding	Ergic3	4.94477	4.76737	4.90488	4.84409	4.95669	5.47945	5.34586	4.9408	4.99602	5.01464	5.19359	5.26654	5.34583	4.91553	5.05693	4.87266	4.96247	5.11776	5.15149	4.68651	4.70027	5.0515	5.08262	4.9304	5.0232	4.89854	5.53734	5.39394	5.31743	4.84799	4.88081	4.85199	5.18821	5.03016	4.82804	chr2	156008045	156018279	10235	+	HAVANA	gene	NA	NA
ENSMUSG00000005882.18	protein_coding	Uqcc1	4.70404	4.65596	4.66275	5.03547	4.80801	4.5113	4.38199	4.72842	4.57481	4.78356	4.80912	4.91291	4.52669	4.80103	4.7365	4.88612	4.9042	4.89653	5.00726	4.63065	4.59897	4.83056	4.87879	4.89463	4.76548	4.88568	4.44577	4.45994	4.42917	4.72328	4.77846	4.74244	4.80478	4.87213	4.91467	chr2	155846894	155930310	83417	-	HAVANA	gene	NA	NA
ENSMUSG00000005886.14	protein_coding	Ncoa2	7.62892	7.32429	7.39161	7.68104	7.91266	7.78441	8.01791	8.03356	7.88654	7.93154	7.75359	7.65597	7.91215	8.06313	8.00622	8.05947	7.88892	7.61931	7.66716	8.25317	8.18276	7.71214	7.73313	7.95519	7.94503	7.81007	7.87547	8.07721	8.08146	8.10084	8.0114	8.0943	7.68177	7.7676	7.64141	chr1	13139105	13374083	234979	-	HAVANA	gene	NA	NA
ENSMUSG00000005893.14	protein_coding	Nr2c2	7.55968	7.44049	7.45942	7.32142	7.67011	7.85391	7.98357	7.72313	7.49424	7.42213	7.54929	7.32569	7.9535	7.85329	7.69486	7.72575	7.51696	7.49692	7.46483	8.09242	8.02811	7.49889	7.56681	7.53233	7.41109	7.37028	7.80768	7.95785	7.90577	8.01942	8.00551	7.99363	7.40236	7.35164	7.42773	chr6	92091390	92174294	82905	+	HAVANA	gene	NA	NA
ENSMUSG00000005899.12	protein_coding	Smpd4	5.60105	5.32679	5.47411	6.30682	5.96521	5.96701	5.57148	5.70341	6.02756	6.29029	5.93785	6.20254	5.84034	5.697	5.79704	5.67224	6.24406	6.20689	6.14111	4.58297	4.77184	5.94393	5.97751	6.04224	6.23227	6.11959	6.15604	5.39864	5.22204	5.09542	4.9815	5.25611	6.07589	6.12279	6.10316	chr16	17619354	17644828	25475	+	HAVANA	gene	NA	NA
ENSMUSG00000005907.14	protein_coding	Pex1	4.30064	4.16496	4.23426	4.3632	4.51411	4.06768	4.14348	4.3845	4.41125	4.54885	4.38195	4.48345	4.25601	4.50083	4.49499	4.4858	4.44708	4.41562	4.55259	4.55908	4.5424	4.30858	4.27011	4.46332	4.5966	4.4238	4.05514	4.26578	4.18295	4.38101	4.34958	4.55651	4.39447	4.48136	4.57163	chr5	3596066	3637232	41167	+	HAVANA	gene	NA	NA
ENSMUSG00000005936.18	protein_coding	Kctd20	6.19528	6.15934	6.1268	6.09713	6.14878	6.43484	6.28947	6.10538	6.10574	6.11824	6.44269	6.43118	6.31822	6.11636	6.0579	6.05453	6.3359	6.39699	6.31227	6.30731	6.25892	6.28716	6.27556	6.15325	6.26495	6.09931	6.44408	6.33299	6.33361	6.12849	6.29369	6.12018	6.24536	6.28315	6.32583	chr17	28951950	28969549	17600	+	HAVANA	gene	NA	NA
ENSMUSG00000005947.11	protein_coding	Itgae	4.6119	5.54745	5.63127	3.16394	3.75979	1.7493	3.07681	4.66636	4.70177	3.33155	3.62777	3.53528	2.5487	4.21051	3.49761	3.86367	2.59349	2.26334	2.29813	5.27832	4.89804	3.41424	3.0144	3.82726	4.01832	4.03311	2.39028	3.51591	4.87244	4.45353	4.93468	4.41425	3.33933	4.00069	3.00891	chr11	73090583	73147446	56864	+	HAVANA	gene	NA	NA
ENSMUSG00000005949.9	protein_coding	Ctns	3.51663	3.70777	3.65861	3.05549	3.35455	3.52257	4.08668	3.66317	3.32939	3.21669	3.23194	2.84026	3.34488	3.54311	3.54359	3.47564	3.07257	2.84662	2.83228	3.84395	3.64739	3.03852	3.19302	3.29944	3.28834	3.19859	3.44316	4.11613	4.04333	3.35764	3.46967	3.72334	3.08756	2.37239	3.12055	chr11	73183596	73199042	15447	-	HAVANA	gene	NA	NA
ENSMUSG00000005973.6	protein_coding	Rcn1	5.24143	4.71207	4.68301	5.33129	5.32163	5.83949	5.46308	5.98512	5.92569	5.55595	6.58269	6.50769	6.36503	5.31098	5.4931	5.67483	6.68451	6.61162	6.49415	4.6138	5.03793	6.14784	6.02728	5.32286	5.37985	5.42833	5.73985	5.26769	5.35789	5.34782	5.15493	5.37293	6.60346	6.58718	6.59384	chr2	105386291	105399319	13029	-	HAVANA	gene	NA	NA
ENSMUSG00000005981.11	protein_coding	Trap1	6.41379	6.33558	6.28808	6.97236	6.69577	6.57422	6.25047	6.38643	6.55771	6.77458	6.44715	6.69704	6.24249	6.44766	6.66024	6.52654	6.69219	6.79644	6.80037	5.72686	5.88029	6.51007	6.48137	6.71786	6.8487	6.78867	6.775	6.02675	5.98222	6.3129	6.36213	6.41707	6.83742	6.66019	6.65472	chr16	4039971	4077827	37857	-	HAVANA	gene	NA	NA
ENSMUSG00000005982.13	protein_coding	Naa60	5.784	5.59348	5.58965	5.96556	6.0775	5.90953	5.99913	5.95111	5.98	5.84442	5.8127	5.82607	5.77573	6.08725	5.97615	6.04211	5.92904	5.8905	5.85552	6.15491	6.04209	5.89241	6.02787	5.95585	6.0909	5.95664	5.93827	6.15271	6.15834	6.11351	6.06893	6.08853	5.78915	5.99618	5.89735	chr16	3872375	3904780	32406	+	HAVANA	gene	NA	NA
ENSMUSG00000006005.17	protein_coding	Tpr	8.94	8.68672	8.77035	9.17958	9.14594	9.26107	9.1797	8.94189	9.05817	9.12718	9.1348	9.27681	9.19955	9.04824	9.10468	9.0781	9.22229	9.2727	9.28388	9.00238	9.00717	9.12992	9.18268	9.0295	9.06729	9.19455	9.20234	9.14436	9.10759	9.13032	9.15701	9.09457	9.27951	9.30844	9.29447	chr1	150392838	150449935	57098	+	HAVANA	gene	NA	NA
ENSMUSG00000006010.14	protein_coding	BC003331	4.67802	4.77231	4.69549	4.52982	4.348	4.97968	4.93399	4.44303	4.6692	4.6552	4.68607	4.80289	4.7401	4.47566	4.54088	4.53969	4.71125	4.7334	4.84608	4.18351	4.22165	4.66496	4.46305	4.50902	4.43261	4.53516	4.87452	4.90128	5.0207	4.51785	4.44146	4.28038	4.65621	4.78611	4.78511	chr1	150361305	150393080	31776	-	HAVANA	gene	NA	NA
ENSMUSG00000006019.15	protein_coding	Dhx34	4.62899	4.84185	4.83279	4.30333	4.18215	4.10905	4.34545	4.59708	4.64692	4.4692	4.6439	4.59939	4.38905	4.49544	4.50917	4.44557	4.67039	4.59036	4.52383	4.36668	4.35843	4.54533	4.49178	4.52235	4.4245	4.39257	4.29541	4.16478	4.22926	4.17887	4.20765	4.29679	4.63872	4.56863	4.25943	chr7	16197147	16222037	24891	-	HAVANA	gene	NA	NA
ENSMUSG00000006021.5	protein_coding	Kptn	3.58673	3.87039	3.81364	3.44278	3.38031	3.55461	3.19655	3.40393	3.54214	3.23545	3.46557	3.65826	3.16028	3.40359	3.43189	3.21619	3.42548	3.433	3.40839	3.0262	2.72367	3.08204	3.24381	3.28651	3.38946	3.34983	3.77079	3.32493	3.55618	3.26788	3.31576	3.25402	3.38201	3.24942	3.0254	chr7	16119895	16127516	7622	+	HAVANA	gene	NA	NA
ENSMUSG00000006024.13	protein_coding	Napa	5.76022	5.85581	5.83183	5.70185	5.74247	5.56583	5.51665	5.74203	5.82806	5.7114	5.62161	5.72411	5.62759	5.71818	5.7695	5.56334	5.63363	5.70038	5.70136	5.74089	5.58595	5.6024	5.7002	5.70947	5.89416	5.66122	5.6866	5.63614	5.39562	5.74234	5.64963	5.73091	5.6766	5.76382	5.6076	chr7	16098458	16117975	19518	+	HAVANA	gene	NA	NA
ENSMUSG00000006050.11	protein_coding	Sra1	5.53283	5.87854	5.80217	5.13038	5.15254	5.21609	4.96241	5.28028	5.24005	5.1493	5.29555	5.34594	5.27797	5.28639	5.07466	5.32359	5.20682	5.27449	5.29941	5.32047	5.44872	5.10812	5.30643	5.14979	5.32047	5.26233	5.14322	5.13113	5.18317	5.20657	5.32596	5.15622	5.21541	5.22437	5.19165	chr18	36666681	36679366	12686	-	HAVANA	gene	NA	NA
ENSMUSG00000006057.15	protein_coding	Atp5g1	5.47383	5.40402	5.54149	5.98292	5.86602	5.40854	4.77725	5.58375	5.72488	5.89572	5.65747	5.95928	5.2854	5.42035	5.50473	5.21815	5.90992	6.0394	5.85643	4.23281	4.52369	5.71652	5.70484	5.85459	5.82655	5.7917	5.65811	4.43108	4.15372	5.04505	5.07174	5.0601	6.09087	6.07679	5.86858	chr11	96068852	96075670	6819	-	HAVANA	gene	NA	NA
ENSMUSG00000006058.10	protein_coding	Snf8	4.85622	4.62635	4.46097	5.18738	5.01129	5.57888	5.28154	4.9599	5.10506	5.15752	5.43189	5.60231	5.41323	4.85304	5.0727	4.86135	5.43453	5.49344	5.4612	4.69294	4.54854	5.27153	5.29771	5.11363	4.99368	5.08822	5.62745	5.15365	5.19995	4.7329	4.81339	4.70604	5.48759	5.41156	5.3571	chr11	96034885	96047430	12546	+	HAVANA	gene	NA	NA
ENSMUSG00000006095.12	protein_coding	Tbcb	4.23656	4.20534	4.06472	4.3942	4.32669	4.56499	4.50115	4.18172	4.50509	4.38637	4.81143	4.93839	4.62624	4.11776	4.09959	4.03725	4.44302	4.64974	4.6498	3.72402	3.36274	4.65863	4.61298	4.50453	4.14771	4.50363	4.52254	4.18792	4.12248	3.83639	3.74873	3.77474	4.71587	4.56329	4.59948	chr7	30224131	30232272	8142	-	HAVANA	gene	NA	NA
ENSMUSG00000006127.9	protein_coding	Inpp5k	6.04475	6.30302	6.18805	5.46802	5.63154	6.14767	6.38079	5.85206	5.69833	5.44081	5.63928	5.26797	6.14635	6.02068	6.13125	5.97382	5.41765	5.46147	5.31464	6.47344	6.42187	5.59705	5.73279	5.60916	5.75356	5.63968	6.07359	6.5978	6.73273	6.11384	6.17112	6.03959	5.26243	5.53683	5.25943	chr11	75630988	75648871	17884	+	HAVANA	gene	NA	NA
ENSMUSG00000006134.3	protein_coding	Crkl	6.20547	5.85884	6.00274	6.5031	6.46846	6.61721	6.47853	6.4263	6.41091	6.39269	6.63745	6.61787	6.42581	6.3551	6.24868	6.50198	6.54951	6.61497	6.61372	6.36181	6.25337	6.5427	6.50888	6.53243	6.4035	6.38322	6.58369	6.52082	6.46673	6.4045	6.29369	6.43756	6.56385	6.65481	6.59108	chr16	17451987	17486255	34269	+	HAVANA	gene	NA	NA
ENSMUSG00000006154.13	protein_coding	Eps8l1	4.06057	4.99183	3.76184	3.92948	4.0679	3.52257	4.21377	4.60592	4.45014	4.18718	3.93487	3.39035	3.83196	4.60566	4.64455	2.79884	3.17104	3.20251	2.10778	4.72781	5.16348	3.97866	2.61214	4.38956	3.95845	2.90769	3.86967	4.00129	3.39057	4.23409	4.07959	3.80592	2.88485	3.19112	1.95832	chr7	4460674	4480487	19814	+	HAVANA	gene	NA	NA
ENSMUSG00000006169.19	protein_coding	Clint1	7.61408	7.27533	7.41103	7.95054	8.05641	7.75167	7.82368	7.88344	7.80342	8.04486	7.50431	7.37004	7.79194	8.29304	8.25537	8.09854	7.6488	7.56856	7.52678	8.13118	8.05868	7.58907	7.58587	8.12825	8.0827	7.99082	7.74005	8.02318	8.14617	8.25562	8.31442	8.29449	7.46894	7.57798	7.56029	chr11	45852051	45910625	58575	+	HAVANA	gene	NA	NA
ENSMUSG00000006191.17	protein_coding	Cdkal1	5.0709	4.89937	4.89956	5.51882	5.51427	4.90844	5.00521	5.37645	5.29426	5.54597	4.95891	4.85122	4.84459	5.49411	5.58392	5.4651	5.1168	5.09229	4.99528	5.39139	5.35862	5.19997	5.16564	5.3909	5.60078	5.42241	4.92694	4.90978	4.97353	5.65652	5.41961	5.37679	5.08435	5.03845	5.2733	chr13	29191746	29855674	663929	-	HAVANA	gene	NA	NA
ENSMUSG00000006215.12	protein_coding	Zbtb17	4.74975	4.94919	4.88079	4.60211	4.60448	4.37439	4.58373	4.64506	4.67549	4.57851	4.51797	4.6747	4.66973	4.73048	4.68358	4.58692	4.574	4.52999	4.39427	4.76186	4.45822	4.46308	4.71069	4.63377	4.70511	4.57453	4.50009	4.5917	4.67578	4.35733	4.64908	4.50885	4.55415	4.5857	4.54894	chr4	141444654	141467930	23277	+	HAVANA	gene	NA	NA
ENSMUSG00000006262.15	protein_coding	Mob1b	5.31711	4.75183	4.91017	5.91945	5.93945	5.77182	5.63342	5.71878	5.67641	5.95904	5.74279	5.99521	5.72857	5.79465	5.76222	5.66445	6.12057	5.89152	5.96625	5.63965	5.66326	6.06196	5.69906	5.86545	5.95905	5.78296	5.74578	5.74968	5.8608	5.81657	5.60381	5.80161	5.75717	5.54849	5.86285	chr5	88720855	88764220	43366	+	HAVANA	gene	NA	NA
ENSMUSG00000006273.14	protein_coding	Atp6v1b2	5.95877	5.86283	5.83114	6.05784	6.11657	5.92369	6.13745	6.12012	6.06178	6.10979	6.27072	6.3943	5.9297	6.096	5.96697	6.06739	6.02252	6.14089	6.11127	5.91879	5.84262	6.1324	6.02093	6.08581	6.0622	6.05309	6.10714	5.99191	5.98114	6.00694	6.09273	6.1086	6.16413	6.03227	6.13009	chr8	69088646	69113711	25066	+	HAVANA	gene	NA	NA
ENSMUSG00000006276.9	protein_coding	Eps15l1	5.57771	5.56391	5.60155	5.49364	5.70218	5.53672	5.386	5.59875	5.7412	5.59883	5.49255	5.2751	5.36465	5.85711	5.8322	5.67354	5.42841	5.38488	5.35002	5.82967	5.74061	5.54358	5.67613	5.65139	5.73172	5.4445	5.54688	5.58756	5.62839	5.67908	5.7582	5.70347	5.3221	5.48013	5.28704	chr8	72341001	72421474	80474	-	ENSEMBL	gene	NA	NA
ENSMUSG00000006281.7	protein_coding	Tep1	5.57595	5.44347	5.37581	5.45835	5.51427	6.19596	6.30859	5.52935	5.52096	5.32641	5.90967	6.01887	5.95291	5.69773	5.66415	5.60033	5.71733	5.72233	5.9337	5.67664	5.5255	5.53282	5.50432	5.61351	5.61865	5.61954	6.0786	6.22407	6.48101	5.72716	5.62035	5.53026	5.66224	5.66722	5.59936	chr14	50824062	50870560	46499	-	ENSEMBL	gene	NA	NA
ENSMUSG00000006288.7	protein_coding	Ttc5	5.0436	5.50779	5.50428	4.53862	4.60448	4.56473	4.61477	4.71826	4.59365	4.43716	4.59645	4.66169	4.5123	4.69672	4.50336	4.59787	4.50597	4.47686	4.48764	4.77405	4.75624	4.44176	4.4812	4.68887	4.60052	4.55571	4.63143	4.61344	4.64342	4.7329	4.84186	4.70604	4.50351	4.24237	4.27331	chr14	50765415	50785518	20104	-	ENSEMBL	gene	NA	NA
ENSMUSG00000006289.14	protein_coding	Osgep	4.81243	4.78917	4.89689	4.76211	4.588	4.95919	5.02845	4.66847	4.75294	4.61239	4.69736	4.85884	4.78796	4.77969	4.77797	4.81986	4.882	4.98222	4.97276	4.68005	4.85962	4.65231	4.81304	4.679	4.69103	4.7923	5.09056	4.87871	4.80088	4.68911	4.51404	4.66238	4.74063	4.88598	4.6587	chr14	50906478	50924893	18416	-	HAVANA	gene	NA	NA
ENSMUSG00000006299.13	protein_coding	Aamp	6.29147	6.49467	6.4573	6.08721	6.22363	6.19672	5.92849	6.11005	6.10509	6.19689	5.97001	6.02949	5.94228	6.26294	6.29478	6.28463	5.9518	6.15095	6.14658	6.02712	6.0929	6.00253	6.09109	6.22651	6.17575	6.13778	6.25165	5.96257	5.83953	6.09185	6.28335	6.1965	6.05407	6.0726	6.03542	chr1	74279840	74284738	4899	-	HAVANA	gene	NA	NA
ENSMUSG00000006301.17	protein_coding	Tmbim1	3.7994	3.7645	3.70033	3.62454	3.74767	3.78816	3.73848	3.69659	3.9194	3.78854	3.92209	3.93262	3.91636	3.90505	3.58974	3.71902	3.92034	3.77259	3.80559	4.169	4.00283	4.08434	4.19556	3.63583	3.97426	3.58635	3.77079	3.78693	3.75905	3.95066	3.97106	4.14418	4.09967	3.8791	3.92781	chr1	74288247	74305622	17376	-	HAVANA	gene	NA	NA
ENSMUSG00000006304.14	protein_coding	Arpc2	8.08729	7.80803	7.77841	8.27413	8.30321	8.6054	8.37597	8.16617	8.3388	8.23625	8.48548	8.73165	8.28663	8.3622	8.45278	8.29824	8.54049	8.58028	8.603	8.11331	8.11353	8.48225	8.41457	8.24796	8.3317	8.22815	8.61264	8.26165	8.28835	8.33472	8.3668	8.34369	8.44528	8.49003	8.48815	chr1	74236084	74268209	32126	+	HAVANA	gene	NA	NA
ENSMUSG00000006307.16	protein_coding	Kmt2b	6.84721	6.42144	6.44551	7.05762	7.22184	7.09999	7.32286	7.29864	7.23764	7.04026	7.25242	6.97238	7.16048	7.42687	7.25559	7.24809	7.2199	7.16688	7.14519	7.70282	7.54277	7.251	7.44816	7.23794	7.28485	7.14585	7.21617	7.2595	7.33405	7.41496	7.47749	7.43401	7.1437	7.22442	7.10606	chr7	30568858	30588726	19869	-	HAVANA	gene	NA	NA
ENSMUSG00000006310.10	protein_coding	Zbtb32	3.43514	2.81615	2.78614	4.56083	3.97796	4.54359	3.92767	3.7213	4.65052	4.06668	5.54557	6.32448	4.10562	2.78622	2.70923	2.66988	5.08994	5.36508	5.65859	1.48363	1.45259	5.41578	5.20783	4.36516	3.93952	4.77845	4.65431	3.09707	3.31038	2.02416	1.64125	2.41051	5.62126	5.44314	5.66397	chr7	30589681	30598909	9229	-	HAVANA	gene	NA	NA
ENSMUSG00000006315.9	protein_coding	Tmem147	4.1986	4.39844	4.48424	4.23867	3.99474	4.02005	3.80383	3.70081	4.15785	4.12148	4.15283	4.43327	3.6201	3.89039	3.86662	3.65933	4.39123	4.41913	4.55215	2.99531	3.17072	4.20922	3.99502	4.23322	4.13939	4.15602	4.18803	3.37032	3.23998	3.53301	3.4252	3.74742	4.51634	4.29177	4.35385	chr7	30727701	30729540	1840	-	HAVANA	gene	NA	NA
ENSMUSG00000006333.14	protein_coding	Rps9	9.89611	10.0949	10.1221	9.73881	9.6754	9.73516	9.70314	9.85195	9.83206	9.68853	9.74556	9.75303	9.62237	9.71545	9.84176	9.84187	9.58874	9.70094	9.66309	9.46646	9.59968	9.51424	9.56801	9.63909	9.49822	9.72786	9.75449	9.78424	9.71959	9.65958	9.63286	9.67277	9.69756	9.67234	9.57504	chr7	3703993	3706897	2905	+	HAVANA	gene	NA	NA
ENSMUSG00000006335.16	protein_coding	Tfpt	3.39213	3.3931	3.29951	3.36918	3.01959	3.46191	3.3372	3.34176	3.44176	3.56198	3.67422	3.96047	3.60209	3.1693	3.12672	3.21619	3.82504	3.98989	3.83827	2.93147	2.92312	3.53995	3.70902	3.42867	3.45757	3.52591	3.51713	3.29834	3.24718	2.94281	3.06832	3.30358	3.84558	3.86741	3.47285	chr7	3620324	3629929	9606	-	HAVANA	gene	NA	NA
ENSMUSG00000006360.11	protein_coding	Crip1	6.7139	6.98673	6.95119	5.73837	5.87522	7.49106	7.37274	6.4213	6.39972	5.64046	7.13486	7.23385	7.05479	6.17883	6.07561	6.03351	6.94915	6.8802	6.89736	5.75325	5.78741	6.33741	6.27937	5.68381	5.47988	5.69109	7.26364	7.16607	7.21017	6.01089	6.22617	6.0347	6.75322	6.92457	6.70421	chr12	113146316	113153879	7564	+	HAVANA	gene	NA	NA
ENSMUSG00000006373.10	protein_coding	Pgrmc1	5.25045	5.24751	5.22166	5.09604	5.00716	5.66212	5.20201	5.12743	5.24745	5.36903	5.54869	5.88293	5.77654	4.90817	5.17667	5.01425	5.59731	5.63905	5.72124	4.6138	4.65051	5.71133	5.49798	5.04426	5.06965	5.07884	5.72552	5.11036	5.13742	4.72328	4.76662	4.70604	5.71048	5.43374	5.56594	chrX	36598206	36606079	7874	+	HAVANA	gene	NA	NA
ENSMUSG00000006390.15	protein_coding	Elovl1	5.23988	4.96166	4.91282	5.52562	5.32826	5.80661	5.59968	5.31575	5.57485	5.24957	5.90495	6.2884	5.62313	5.12253	5.27705	5.23196	5.92928	6.10553	6.11127	4.634	4.77958	5.88635	5.85319	5.32444	5.35328	5.47487	5.87366	5.52155	5.41652	5.11025	5.06117	5.07768	6.07373	6.04467	5.88109	chr4	118428093	118432953	4861	+	HAVANA	gene	NA	NA
ENSMUSG00000006392.16	protein_coding	Med8	5.12899	5.18892	5.12928	5.17448	5.34144	5.05751	4.95272	5.14877	5.16674	5.2905	5.11017	5.23468	5.10653	5.10762	5.13034	5.086	5.18001	5.29286	5.21781	4.72781	4.87174	5.06396	5.09996	5.23808	5.17254	5.22724	5.09242	4.87871	4.81305	4.97902	5.0169	4.99461	5.01373	5.13441	5.2419	chr4	118409337	118415782	6446	+	HAVANA	gene	NA	NA
ENSMUSG00000006398.15	protein_coding	Cdc20	4.78433	4.11347	4.30884	5.29061	3.96099	7.06473	6.84863	5.26495	5.62052	4.98168	6.64378	6.99233	6.82128	3.53677	3.57714	4.07434	6.94647	6.94208	6.9161	2.21332	2.36077	6.54768	6.42123	4.7011	4.25086	5.07489	7.16399	6.75697	6.63391	2.5662	2.50979	2.70912	6.78802	6.67888	6.58135	chr4	118432901	118437352	4452	-	HAVANA	gene	NA	NA
ENSMUSG00000006412.10	protein_coding	Pfdn2	3.42456	2.53771	2.45462	4.86262	4.74793	3.76648	3.36667	4.35409	4.50954	4.88656	4.41221	4.77042	4.08826	4.31334	4.4876	4.50823	4.55841	4.65111	4.60038	3.81275	3.90497	4.58589	4.64104	4.62814	4.64879	4.80672	3.9041	3.50234	3.24164	4.20557	4.1748	4.29213	4.71793	4.78907	4.55463	chr1	171345670	171359254	13585	+	HAVANA	gene	NA	NA
ENSMUSG00000006418.17	protein_coding	Rnf114	6.88868	6.87967	6.89389	6.60012	6.88986	7.02621	7.45051	7.1467	6.98934	6.65894	6.86264	6.65064	7.14074	6.80339	6.82464	6.87205	6.74542	6.73502	6.79249	6.69388	6.72679	6.82432	6.81787	6.89125	6.73115	6.66555	7.00992	7.45838	7.51264	6.82777	6.8213	6.92308	6.79856	6.91222	6.69522	chr2	167492645	167516173	23529	+	HAVANA	gene	NA	NA
ENSMUSG00000006423.15	protein_coding	C330007P06Rik	5.5912	5.46074	5.44302	5.89626	5.67642	5.9461	5.82079	5.72262	5.72656	5.90913	5.79563	5.84848	5.88388	5.66633	5.71146	5.63773	5.97127	5.89974	5.97178	5.18652	5.30855	5.77144	5.75556	5.67467	5.80916	5.79916	5.95368	6.01384	5.79049	5.28057	5.32438	5.55949	5.67311	5.59631	5.79529	chrX	36823737	36874111	50375	-	HAVANA	gene	NA	NA
ENSMUSG00000006442.10	protein_coding	Srm	4.98428	4.28752	4.44098	6.83285	6.30826	4.78556	3.68015	5.81631	6.16802	6.60588	5.89191	6.45211	5.05946	5.42362	5.56454	5.58413	6.35455	6.5799	6.4984	3.6723	4.25122	6.24813	6.16543	6.4185	6.60241	6.6106	5.04512	3.034	2.2252	5.11025	5.22579	5.35345	6.72034	6.58293	6.4668	chr4	148591503	148594993	3491	+	HAVANA	gene	NA	NA
ENSMUSG00000006456.10	protein_coding	Rbm14	5.93158	5.25053	5.38185	6.65619	6.78048	6.52846	6.44193	6.58423	6.54879	6.59512	6.52518	6.61909	6.50042	6.64054	6.38105	6.44098	6.64576	6.6344	6.54843	6.43219	6.3976	6.50709	6.60021	6.71895	6.5775	6.58304	6.64774	6.22392	5.97501	6.62252	6.57871	6.49796	6.75735	6.73619	6.57614	chr19	4800569	4811634	11066	-	HAVANA	gene	NA	NA
ENSMUSG00000006471.17	protein_coding	Ndor1	5.71938	5.76549	5.83416	5.66849	5.9242	5.41691	5.2931	5.18904	5.09509	4.75746	4.91768	4.68331	4.78846	6.0819	6.01672	5.95096	5.71247	5.80599	5.60224	6.2474	6.23223	5.73001	5.92984	5.89557	5.86436	5.76211	5.49503	5.70762	5.38913	6.05947	6.24371	6.12478	5.65646	5.74368	5.46076	chr2	25244821	25256022	11202	-	HAVANA	gene	NA	NA
ENSMUSG00000006476.19	protein_coding	Nsmf	3.41647	3.91088	3.79372	2.95174	3.05201	2.74787	2.75884	3.2933	3.29297	3.3773	2.9084	2.49393	2.80635	3.45835	3.23578	3.05867	2.84366	2.7923	2.83995	2.69562	2.47953	2.99365	2.87636	3.37469	3.18764	3.1348	3.05722	2.56149	2.85343	3.17217	3.02924	3.16743	2.80345	3.24942	2.83276	chr2	25054355	25062881	8527	+	HAVANA	gene	NA	NA
ENSMUSG00000006494.11	protein_coding	Pdk1	7.84317	7.8858	7.78068	7.46634	7.57548	8.42739	8.06755	8.04519	7.6436	7.50184	8.01351	7.41013	8.18877	7.8251	7.78899	8.04329	7.60814	7.55435	7.59046	8.30552	8.53519	7.64403	7.65406	7.44707	7.45447	7.53845	8.15531	8.57061	8.63136	7.93004	7.85184	7.98968	7.58233	7.66423	7.59522	chr2	71873224	71903858	30635	+	HAVANA	gene	NA	NA
ENSMUSG00000006498.16	protein_coding	Ptbp1	8.3503	8.04467	8.11833	8.90045	8.69929	8.82872	8.58486	8.46914	8.7074	8.79221	8.74466	9.10679	8.59929	8.37453	8.38636	8.3055	8.90836	9.05588	8.93416	7.71166	7.81548	8.80273	8.81272	8.72414	8.76721	8.6848	8.9518	8.39091	8.23909	8.16746	8.24136	8.24289	9.01546	8.96783	8.87807	chr10	79854427	79864771	10345	+	HAVANA	gene	NA	NA
ENSMUSG00000006517.4	protein_coding	Mvd	3.75363	3.51197	3.4562	3.65174	3.46702	5.08885	4.79362	3.6114	3.62504	3.81982	4.41004	4.82812	4.73936	3.30993	3.52079	3.22328	4.39436	4.90935	4.93383	2.66976	2.66917	3.99502	4.17592	3.83616	3.92516	3.6927	5.32406	4.99297	4.76623	3.25459	3.52691	2.9564	4.26591	4.17628	4.188	chr8	122433596	122443422	9827	-	ENSEMBL	gene	NA	NA
ENSMUSG00000006519.10	protein_coding	Cyba	6.31551	6.45752	6.43818	6.08415	5.89769	6.71024	6.66507	5.72082	5.95074	5.78007	6.53839	6.86912	6.29459	5.612	5.62326	5.60464	6.76979	6.86101	6.84397	5.35738	5.26066	6.63116	6.60854	6.13714	6.09999	6.14499	6.75221	6.55281	6.42451	5.32892	5.338	5.54077	6.65513	6.65481	6.54893	chr8	122424772	122432940	8169	-	ENSEMBL	gene	NA	NA
ENSMUSG00000006526.11	protein_coding	Tmem110	3.58609	3.8266	3.69589	3.29161	3.41811	3.36885	3.38119	3.44887	3.13736	2.85374	3.12453	3.40083	3.0113	3.30247	3.67335	3.30573	3.6364	3.64926	3.48871	3.59885	3.54821	3.32391	3.54151	3.492	3.65617	3.55869	3.52266	3.73001	3.37751	3.48829	3.51281	3.31973	3.52852	3.26364	3.19532	chr14	30825590	30876986	51397	+	HAVANA	gene	NA	NA
ENSMUSG00000006527.14	protein_coding	Sfmbt1	4.79772	4.20217	4.29675	5.77588	5.43044	5.21951	5.0192	5.44459	5.51584	5.87681	5.57545	5.72827	5.43119	5.40806	5.48723	5.37885	5.53751	5.41601	5.34328	4.58297	4.68936	5.54247	5.34063	5.69241	5.73172	5.60086	5.33039	4.83775	4.61866	5.09542	5.02685	5.10589	5.39337	5.43059	5.46379	chr14	30714849	30822713	107865	+	HAVANA	gene	NA	NA
ENSMUSG00000006585.2	protein_coding	Cdt1	5.50466	4.93409	5.10408	6.34826	5.87974	6.66141	6.33306	6.07226	6.23493	6.27752	6.0855	6.48078	6.26126	5.57221	5.78752	5.71938	6.35777	6.44305	6.37966	4.4863	4.73782	6.02898	6.04171	5.9973	6.12114	6.08438	6.83408	6.11415	5.9473	5.31938	5.17298	5.16071	6.17631	6.40679	6.16399	chr8	122568015	122573128	5114	+	ENSEMBL	gene	NA	NA
ENSMUSG00000006589.7	protein_coding	Aprt	4.87672	4.88872	4.92464	5.38331	4.91323	4.82988	4.77175	4.9373	5.19538	5.29795	5.24707	5.61923	4.83112	4.55632	4.53785	4.53659	4.91517	5.28445	5.36206	3.76678	3.86179	5.05462	4.94552	5.04234	5.31523	5.16828	5.00416	4.19392	4.08006	4.33225	4.13587	4.3528	5.35818	5.29874	4.96682	chr8	122574637	122576907	2271	-	ENSEMBL	gene	NA	NA
ENSMUSG00000006599.13	protein_coding	Gtf2h1	5.72703	5.79057	5.78142	5.93908	5.74247	5.5327	5.34586	5.57867	5.8032	5.82513	5.91304	6.23364	5.60742	5.38174	5.49895	5.41025	5.78842	5.90072	5.92263	5.0668	5.19853	5.81537	5.73168	5.72273	5.77641	5.928	5.61065	5.53585	5.51818	5.30656	5.30156	5.45929	6.05407	5.96209	5.96682	chr7	46796103	46823800	27698	+	HAVANA	gene	NA	NA
ENSMUSG00000006673.14	protein_coding	Qrich1	7.32225	7.39046	7.37376	7.23876	7.29555	7.11141	7.05739	7.28258	7.30287	7.2844	7.22194	7.34117	7.11193	7.36305	7.38512	7.33295	7.33579	7.35001	7.24276	7.28342	7.28885	7.25313	7.39445	7.18602	7.30189	7.16643	7.19969	7.04297	7.00222	7.36675	7.39763	7.40907	7.28739	7.26566	7.29346	chr9	108516806	108560163	43358	+	HAVANA	gene	NA	NA
ENSMUSG00000006676.16	protein_coding	Usp19	7.18521	7.10697	7.13436	7.05018	7.21291	7.25876	7.41215	7.328	7.24033	7.13361	7.22049	7.07815	7.29303	7.36059	7.25775	7.21291	7.0899	7.07966	7.09595	7.5606	7.46853	7.06561	7.19466	7.26002	7.20685	7.10436	7.37915	7.44139	7.48665	7.46053	7.35935	7.4561	7.09321	7.14601	6.98484	chr9	108490602	108502337	11736	+	HAVANA	gene	NA	NA
ENSMUSG00000006678.6	protein_coding	Pola1	6.12417	5.48048	5.65538	7.30036	6.69834	7.40287	7.0219	6.59237	6.83046	7.30172	6.94704	7.17403	7.0733	6.25233	6.46871	6.52152	7.25961	7.29169	7.25513	4.30504	4.751	6.94873	6.81892	6.8246	6.81534	7.08104	7.40598	6.81912	6.56648	5.65904	5.32998	5.25191	7.23578	7.24874	7.31999	chrX	93304767	93632155	327389	-	HAVANA	gene	NA	NA
ENSMUSG00000006699.17	protein_coding	Cdc42	8.71761	8.74114	8.73052	8.6532	8.589	8.98804	8.763	8.57242	8.6668	8.66934	8.97424	9.22639	8.77841	8.59001	8.669	8.55613	8.88753	8.89589	8.94771	8.24279	8.34059	8.88162	8.71773	8.53237	8.65023	8.5716	8.93816	8.58478	8.62775	8.45725	8.48029	8.50333	8.7993	8.77289	8.85278	chr4	137319696	137357720	38025	-	HAVANA	gene	NA	NA
ENSMUSG00000006705.12	protein_coding	Pknox1	6.23258	6.23177	6.06105	6.02786	6.27603	6.54992	6.44956	6.09992	6.1175	5.84968	6.17369	6.31205	6.01299	6.28678	6.26077	6.2407	6.46693	6.41829	6.42182	6.53021	6.44313	6.41117	6.32578	6.12629	6.08499	6.04733	6.5903	6.35735	6.32173	6.48068	6.44429	6.5009	6.61395	6.49077	6.4668	chr17	31564749	31607684	42936	+	HAVANA	gene	NA	NA
ENSMUSG00000006715.11	protein_coding	Gmnn	4.17856	3.46495	3.52687	5.21985	4.56009	5.85137	5.18142	4.81296	5.0171	5.28601	5.45646	5.86885	5.60742	4.26528	4.42569	4.5451	5.67682	5.7511	5.83988	2.33345	2.56558	5.18721	5.19659	4.81355	4.65376	5.12881	5.8941	5.02576	4.60752	3.34515	3.29943	3.45748	5.57296	5.47708	5.63472	chr13	24751845	24761923	10079	-	HAVANA	gene	NA	NA
ENSMUSG00000006728.12	protein_coding	Cdk4	7.03807	6.73028	6.78428	7.78966	7.2641	7.68708	7.25767	7.19532	7.36794	7.51201	7.49701	7.81959	7.36039	7.01439	7.14455	7.20664	7.72365	7.94245	7.86428	5.85102	6.14863	7.52226	7.42165	7.4743	7.56381	7.63535	7.79692	7.04537	6.84369	6.60802	6.61169	6.71594	7.77964	7.82956	7.70903	chr10	127063534	127067920	4387	+	HAVANA	gene	NA	NA
ENSMUSG00000006731.9	protein_coding	B4galnt1	8.24617	8.33377	8.26848	7.91369	8.01487	8.34485	8.457	8.24913	8.26625	7.78436	8.17735	8.18876	8.01548	8.13001	8.20931	8.13822	8.00899	8.10268	8.14258	8.48069	8.4242	8.14055	8.28112	7.93072	8.04002	7.9373	8.49225	8.56365	8.50253	8.28697	8.3351	8.2863	8.11504	8.19922	7.95986	chr10	127165156	127172340	7185	+	ENSEMBL	gene	NA	NA
ENSMUSG00000006732.14	protein_coding	Mettl1	4.04971	3.91322	3.91988	5.00987	4.82218	3.35072	2.35037	4.55202	4.57292	4.85402	3.87647	4.50057	3.45433	4.39726	4.82061	4.49033	4.39123	4.79561	4.55215	3.31179	3.787	4.42978	4.49702	4.97138	4.92075	4.90067	3.73785	2.02613	1.08703	4.50495	4.56275	4.36841	4.60308	4.65744	4.69523	chr10	127041414	127046365	4952	+	HAVANA	gene	NA	NA
ENSMUSG00000006736.8	protein_coding	Tspan31	3.96858	3.91511	3.83527	4.33957	3.53557	5.10401	4.80879	3.49939	4.03788	3.70053	4.67696	5.09183	4.59987	3.341	3.84195	3.8318	4.34082	4.44192	4.77037	1.96514	2.78747	4.01892	4.11122	3.86824	4.19409	4.41437	5.00562	4.62137	4.79116	3.11006	3.30631	3.23762	4.2331	4.17214	4.18397	chr10	127067317	127070261	2945	-	ENSEMBL	gene	NA	NA
ENSMUSG00000006740.13	protein_coding	Kif5b	7.70997	7.70219	7.75003	7.66652	7.59348	7.71552	7.46421	7.49382	7.60884	7.68893	7.95338	8.19759	7.69564	7.47039	7.47465	7.49683	8.03814	8.01455	8.06344	7.34578	7.43054	7.98304	7.87732	7.53547	7.53232	7.64722	7.69326	7.54469	7.58045	7.47564	7.48654	7.53603	7.91461	7.94733	8.03659	chr18	6201002	6242174	41173	-	HAVANA	gene	NA	NA
ENSMUSG00000006763.14	protein_coding	Saal1	4.61688	4.51227	4.39826	4.8477	4.65812	4.92691	4.71558	4.85993	4.93234	4.93082	4.97446	5.04401	4.6762	4.55318	4.54634	4.57034	4.92171	4.95775	4.90118	4.45258	4.59897	4.91205	4.7595	4.82925	4.70511	4.7923	5.05662	4.70232	4.50618	4.51055	4.66829	4.41425	4.89596	5.01343	5.07769	chr7	46686108	46710680	24573	-	HAVANA	gene	NA	NA
ENSMUSG00000006782.16	protein_coding	Cnp	7.54986	7.54703	7.46273	7.07022	7.633	7.58783	7.69194	7.88701	7.61092	7.27114	7.40642	7.14846	7.42075	7.5566	7.6822	7.86819	7.51993	7.50674	7.44128	7.82908	8.18564	7.66783	7.76538	7.48995	7.21723	7.31496	7.65438	7.65499	7.74218	7.8471	7.73763	7.88813	7.55251	7.73492	7.45029	chr11	100574904	100591729	16826	+	HAVANA	gene	NA	NA
ENSMUSG00000006818.4	protein_coding	Sod2	5.71707	5.5999	5.68427	6.08721	5.92858	5.84166	5.24232	5.65416	5.85407	6.1889	5.92109	6.16308	5.73788	5.65512	5.81356	5.67483	6.0154	6.1571	6.1442	5.29744	5.43409	5.84455	5.70813	5.89876	5.98236	5.91329	5.92369	5.43266	5.1981	5.59721	5.46791	5.66922	5.92531	5.83219	6.14148	chr17	13007839	13018119	10281	+	ENSEMBL	gene	NA	NA
ENSMUSG00000006850.7	protein_coding	Tmco6	3.66889	4.08475	3.93814	3.00455	3.06795	3.74252	3.69184	3.53474	3.4376	3.23545	3.08496	2.91525	3.267	3.30247	3.33717	3.18748	3.11124	3.2835	3.14271	3.61248	3.55424	3.10633	2.9003	3.26029	3.36128	3.08317	3.96221	3.75955	3.75102	3.54398	3.46967	3.51471	3.13824	3.19112	2.8879	chr18	36735068	36742391	7324	+	ENSEMBL	gene	NA	NA
ENSMUSG00000006906.10	protein_coding	Stambp	3.49961	2.29901	2.36634	4.52739	4.70475	4.86863	4.99108	4.72437	4.60111	4.53628	4.60846	4.71093	5.02945	4.67954	4.50336	4.51364	4.60143	4.58799	4.66232	4.53006	4.57841	4.49792	4.60538	4.65153	4.43129	4.66009	4.81859	4.91635	4.8371	4.79848	4.68095	4.67499	4.47093	4.5857	4.74087	chr6	83543211	83572729	29519	-	HAVANA	gene	NA	NA
ENSMUSG00000006920.14	protein_coding	Ezh1	6.20428	6.38613	6.37972	5.70585	6.1204	5.94903	6.13316	6.25696	6.022	5.4924	5.92269	5.34458	5.71816	6.40735	6.30316	6.45382	5.46172	5.41472	5.4932	7.0638	7.01152	5.88985	6.05688	6.06986	5.98928	5.98739	5.63258	6.31404	6.47365	6.56789	6.61239	6.54622	5.4513	5.5339	5.42081	chr11	101191115	101226463	35349	-	HAVANA	gene	NA	NA
ENSMUSG00000006932.16	protein_coding	Ctnnb1	8.03401	8.12307	8.27232	7.65833	7.74778	8.11782	8.03303	7.94336	7.88316	7.7073	8.09388	8.18214	8.08037	7.81414	7.57221	7.6747	8.08365	8.06154	8.0657	7.64937	7.72242	7.9084	7.85949	7.68038	7.52524	7.63632	8.14712	7.82947	7.83087	7.79428	7.73607	7.78842	8.03479	7.97251	8.0165	chr9	120929216	120960507	31292	+	HAVANA	gene	NA	NA
ENSMUSG00000006941.4	protein_coding	Eif1b	4.6123	4.61047	4.76423	4.84046	4.68937	4.59842	4.2379	4.61032	4.81846	4.8357	4.61443	4.72975	4.26577	4.54371	4.52071	4.53089	4.69097	4.73107	4.62726	3.87822	4.22124	4.68494	4.51264	4.53334	4.63329	4.64745	4.56592	4.36704	4.21097	4.33856	4.1632	4.39913	4.62101	4.72064	4.80912	chr9	120492606	120495327	2722	+	ENSEMBL	gene	NA	NA
ENSMUSG00000006998.15	protein_coding	Psmd2	7.40203	7.16262	7.16713	7.94568	7.74306	7.8461	7.5095	7.58442	7.80582	7.93416	7.8902	8.18646	7.60899	7.4	7.4713	7.44623	7.94991	8.0293	8.02983	6.56656	6.78231	7.85269	7.74637	7.75056	7.82539	7.80949	8.01137	7.11983	7.07057	7.17237	7.29489	7.18348	7.98608	7.95773	7.94313	chr16	20651652	20663414	11763	+	HAVANA	gene	NA	NA
ENSMUSG00000007029.16	protein_coding	Vars	7.64973	7.32099	7.39672	8.12596	7.86612	8.48412	8.30351	8.0311	8.19357	8.38522	8.20809	8.44765	8.24625	7.49311	7.61148	7.55315	8.3041	8.41903	8.37977	6.35372	6.72474	7.96862	8.04355	8.00365	8.08701	7.96202	8.57201	8.20685	7.89874	7.21333	7.1702	7.16686	8.25269	8.28099	8.14242	chr17	35000987	35016322	15336	+	HAVANA	gene	NA	NA
ENSMUSG00000007036.15	protein_coding	Abhd16a	4.75135	5.04395	5.03544	4.33975	4.18946	4.76972	4.49975	4.42535	4.39966	3.93902	4.78463	4.70461	4.5433	4.28056	4.35653	4.2512	4.71628	4.92386	4.88458	4.3787	4.19833	4.58693	4.69023	4.06922	4.14353	4.11253	4.7136	4.4479	4.45115	4.12876	4.4265	4.30493	4.70185	4.80568	4.64809	chr17	35089263	35102987	13725	+	HAVANA	gene	NA	NA
ENSMUSG00000007038.5	protein_coding	Neu1	5.48229	5.82449	5.97394	5.12465	5.05993	4.86011	5.06487	5.12435	5.04611	5.11595	5.12418	4.74833	4.81753	5.32578	5.09603	5.3677	4.8273	4.6483	4.77873	5.66277	5.61938	4.88949	4.97023	4.9734	5.20857	5.08447	4.87811	5.06178	5.15666	5.40608	5.41583	5.41863	4.75694	4.97507	4.48481	chr17	34931253	34935953	4701	+	HAVANA	gene	NA	NA
ENSMUSG00000007041.9	protein_coding	Clic1	7.38004	7.38911	7.33035	6.90798	6.90879	8.20695	8.18648	7.1087	7.18179	6.88412	7.94866	8.17966	7.91899	6.86168	6.88505	6.89276	7.89863	8.00754	7.96179	6.36282	6.50511	7.73496	7.66342	6.84899	6.76515	6.9164	8.14413	8.06395	8.00445	6.84117	6.92609	6.73116	7.78874	7.79171	7.78329	chr17	35049966	35058749	8784	+	HAVANA	gene	NA	NA
ENSMUSG00000007050.17	protein_coding	Lsm2	4.31016	3.71315	3.71418	5.15271	4.80801	5.15827	4.73266	4.8488	5.14136	5.19313	5.19757	5.5397	4.94802	4.4987	4.50045	4.6954	5.23883	5.50555	5.57137	3.65922	4.04414	5.14387	5.05089	4.94488	4.94705	5.05223	5.27078	4.37978	4.26869	4.3511	4.40376	4.5505	5.48106	5.32947	5.40514	chr17	34981862	34985891	4030	+	HAVANA	gene	NA	NA
ENSMUSG00000007080.14	protein_coding	Pole	6.12902	5.00832	5.25013	7.81412	7.05991	7.83557	7.49707	7.17817	7.34881	7.58309	7.36967	7.67955	7.56815	6.81916	6.97536	7.057	7.70108	7.80982	7.71463	4.57254	4.92154	7.28664	7.23052	7.36448	7.50967	7.49042	7.99902	7.2986	7.06602	5.97082	5.81101	5.88266	7.59524	7.56727	7.54465	chr5	110286306	110337474	51169	+	HAVANA	gene	NA	NA
ENSMUSG00000007338.9	protein_coding	Mrpl49	4.80133	4.86235	4.86041	4.93702	4.93946	4.94314	4.69249	4.81487	4.64512	4.67555	4.91123	5.04233	4.68906	4.47234	4.34034	4.77956	5.04869	5.06146	4.99011	4.02308	4.09049	4.86656	4.89874	4.79997	4.54837	4.85742	5.09985	4.50715	4.45115	4.39416	4.62306	4.4804	5.08004	5.0467	4.97108	chr19	6053630	6057751	4122	-	ENSEMBL	gene	NA	NA
ENSMUSG00000007411.15	protein_coding	Mark3	6.13071	6.31676	6.31285	5.77777	5.9242	5.98475	6.05157	5.83993	5.84152	5.92478	6.09264	6.03106	6.24249	5.79065	5.92198	5.76624	6.02049	5.96527	5.99146	5.95001	5.86218	5.94897	5.98126	5.85673	5.89662	5.8518	6.00603	6.18026	6.14903	5.87853	6.06159	5.88808	5.71605	6.05083	5.84671	chr12	111574510	111656227	81718	+	ENSEMBL	gene	NA	NA
ENSMUSG00000007415.15	protein_coding	Gatad1	5.30124	5.18106	5.22116	5.48844	5.22886	5.43081	5.13545	5.42805	5.53211	5.62063	5.82533	5.93163	5.65533	5.02212	5.18628	5.25208	5.76867	5.83776	5.75312	5.03178	4.86695	5.51375	5.38704	5.31991	5.2261	5.37455	5.53706	5.35095	5.37822	4.96097	4.89196	5.05712	5.66273	5.54524	5.64275	chr5	3632932	3657185	24254	-	HAVANA	gene	NA	NA
ENSMUSG00000007458.14	protein_coding	M6pr	7.51846	7.64191	7.62725	7.62863	7.49669	7.45578	7.13645	7.35284	7.42413	7.4908	7.48353	7.71619	7.2807	7.41173	7.51521	7.40282	7.50516	7.59765	7.57041	6.95227	6.97322	7.51244	7.43693	7.38252	7.61257	7.44374	7.41493	7.11889	7.08821	7.33117	7.30107	7.25558	7.50638	7.54121	7.53532	chr6	122308720	122317680	8961	+	HAVANA	gene	NA	NA
ENSMUSG00000007476.18	protein_coding	Lrrc8a	5.99342	5.73692	5.92485	5.66376	6.1048	6.20368	6.34703	6.15703	6.14736	5.87478	6.22433	5.75687	6.41736	6.65363	6.43099	6.30619	6.1525	5.64617	5.64959	6.75481	6.54537	5.78245	5.84095	6.04358	6.12764	5.80248	6.29508	6.21899	6.33665	6.58255	6.78251	6.61907	5.76745	5.96248	5.79223	chr2	30237715	30263790	26076	+	HAVANA	gene	NA	NA
ENSMUSG00000007564.14	protein_coding	Ppp2r1a	6.98812	6.83136	6.84144	7.22134	7.12516	7.39662	7.14396	7.03202	7.19233	7.23921	7.25497	7.50847	7.25356	6.97516	7.01721	6.93601	7.21414	7.33067	7.28496	6.6433	6.70185	7.1611	7.13495	7.14472	7.2507	7.16682	7.3996	7.17478	7.13893	6.87414	6.96026	6.93492	7.24158	7.2665	7.15465	chr17	20945311	20965916	20606	+	HAVANA	gene	NA	NA
ENSMUSG00000007570.15	protein_coding	Fance	3.49365	3.75283	3.72324	3.4089	3.58249	3.4103	3.12935	3.39376	3.21726	3.39409	3.13564	2.98653	3.08447	3.20176	3.30415	3.1283	3.22846	3.20844	3.3068	3.36914	3.35461	2.9406	3.05051	3.35625	3.42392	3.4867	3.23635	3.01779	3.10389	3.28105	3.4252	3.39787	3.08756	3.43673	2.8879	chr17	28313530	28326568	13039	+	HAVANA	gene	NA	NA
ENSMUSG00000007589.8	protein_coding	Tinf2	4.80462	4.93546	4.79749	4.96227	4.67383	4.90222	4.92822	4.73448	4.84856	4.77931	4.71783	5.00334	4.52669	4.69387	4.67328	4.69794	4.75098	4.71656	4.71336	4.82764	4.61058	4.77482	4.80249	4.79084	4.87415	4.89212	4.78213	4.4327	4.57357	4.69896	4.59657	4.57089	4.82555	4.77127	4.62123	chr14	55679083	55681817	2735	-	ENSEMBL	gene	NA	NA
ENSMUSG00000007603.8	protein_coding	Dus3l	4.87362	5.07455	4.98111	4.78116	4.5769	4.70933	4.63308	4.88012	4.87035	4.83775	4.70297	4.64416	4.81166	4.68242	4.64455	4.68002	4.7062	4.8836	4.65364	4.65061	4.71379	4.64404	4.83184	4.69377	4.76548	4.66261	4.86944	4.81682	4.73073	4.57612	4.66829	4.64326	4.78901	4.67881	4.58831	chr17	56764751	56770092	5342	+	ENSEMBL	gene	NA	NA
ENSMUSG00000007610.15	protein_coding	Gtpbp3	4.13556	4.37997	4.33664	3.9798	3.83624	3.98912	4.16427	3.80433	3.79742	3.5914	3.98179	3.75534	3.73199	3.89536	3.82998	3.69546	4.07246	3.86011	4.17207	3.92814	3.89541	3.99176	3.99131	3.93478	4.05835	3.92413	3.99045	3.90324	4.05568	3.95888	3.97034	3.6228	4.02686	3.94002	3.86057	chr8	71488103	71499583	11481	+	HAVANA	gene	NA	NA
ENSMUSG00000007613.15	protein_coding	Tgfbr1	6.09174	6.12232	6.15106	5.9263	6.0895	5.77749	5.72731	6.46995	6.37761	6.51542	6.33538	6.254	6.09174	5.9182	5.90226	5.96644	6.38565	6.19274	6.1847	5.66441	5.79887	6.24129	5.94238	6.23799	5.95905	6.00831	6.04598	5.70102	5.64483	5.83678	5.77602	5.97477	6.08453	6.1325	6.33412	chr4	47353222	47414931	61710	+	HAVANA	gene	NA	NA
ENSMUSG00000007617.17	protein_coding	Homer1	4.18121	4.29471	4.25156	4.45808	4.67383	3.81927	3.79302	4.1174	4.3182	4.28043	3.68937	3.82701	3.53248	4.5278	4.38837	4.53659	3.88876	3.58681	4.06151	3.92268	4.24005	3.92505	3.63008	4.26323	4.51998	4.35885	3.77543	3.77892	3.77612	4.62342	4.24224	4.41425	4.06228	3.72056	4.10511	chr13	93303757	93404129	100373	+	HAVANA	gene	NA	NA
ENSMUSG00000007656.13	protein_coding	Arpp19	5.405	5.47653	5.47501	5.4948	5.33157	5.26218	5.00051	5.46296	5.35844	5.69455	5.55697	5.84219	5.72754	5.16636	5.18576	5.29387	5.64422	5.63133	5.76625	4.86514	4.90748	5.44107	5.4076	5.31651	5.05873	5.472	5.38612	5.02778	5.04547	5.08043	4.9917	5.07768	5.41065	5.37602	5.41143	chr9	75037614	75060313	22700	+	HAVANA	gene	NA	NA
ENSMUSG00000007659.18	protein_coding	Bcl2l1	5.17226	4.3884	4.55527	6.87734	6.36258	5.45984	4.49308	6.20625	6.39543	7.06012	6.5832	6.81874	6.19897	4.98477	5.38202	5.38361	6.34404	6.50829	6.30397	4.04838	4.24751	6.44072	6.42334	6.9349	7.08239	6.7927	5.33197	5.12178	4.57928	4.86558	4.65551	4.80113	6.4861	6.38907	6.3636	chr2	152780668	152831728	51061	-	HAVANA	gene	NA	NA
ENSMUSG00000007670.9	protein_coding	Khsrp	7.16949	6.31588	6.35371	8.21338	7.85984	8.37881	7.98799	7.89295	8.06467	8.11721	8.12257	8.36897	8.09691	7.72851	7.80205	7.77469	8.38977	8.46021	8.44193	7.10779	7.18127	8.14423	8.13258	8.06316	8.11944	8.06471	8.50332	7.82319	7.62118	7.49696	7.51599	7.64258	8.36865	8.32994	8.31832	chr17	57021058	57031507	10450	-	ENSEMBL	gene	NA	NA
ENSMUSG00000007721.5	protein_coding	Ccdc124	4.1148	3.94783	4.00651	4.42939	4.26054	4.30387	3.99528	4.1112	4.43976	4.38211	4.59041	4.81251	4.32462	4.05488	3.95859	3.98123	4.64162	4.83068	4.74846	3.26075	3.20942	4.59767	4.82142	4.10649	4.28148	4.3019	4.44285	4.07364	3.90911	3.4996	3.85213	3.88402	4.62694	4.75123	4.59385	chr8	70868227	70873490	5264	-	ENSEMBL	gene	NA	NA
ENSMUSG00000007739.10	protein_coding	Cct4	7.82256	7.58206	7.64141	8.43217	8.28798	7.99829	7.86557	8.11307	8.22442	8.42694	8.17179	8.44765	7.91307	7.85793	8.01593	7.96166	8.09255	8.18686	8.23845	7.07308	7.2945	8.08052	7.88034	8.25171	8.31871	8.33883	8.14525	7.72927	7.58365	7.77694	7.78008	7.80196	8.28162	8.21714	8.28061	chr11	22990519	23003780	13262	+	HAVANA	gene	NA	NA
ENSMUSG00000007812.16	protein_coding	Zfp655	5.87595	5.71871	5.82203	5.92288	6.05792	5.92165	6.15867	5.91034	5.89944	5.88871	5.81194	5.82382	6.10299	6.11848	6.06284	6.0664	5.81561	5.89889	5.82255	5.99625	6.08147	5.84905	5.80115	5.94682	5.84287	5.91224	5.81509	6.26338	6.32258	6.22194	6.16663	6.09928	5.92772	5.8417	6.03761	chr5	145231715	145247302	15588	+	HAVANA	gene	NA	NA
ENSMUSG00000007815.13	protein_coding	Rhoa	7.94333	7.49362	7.40361	8.36481	8.36658	8.64988	8.44782	8.3569	8.45437	8.44794	8.47528	8.67537	8.47173	8.35555	8.49043	8.42559	8.51319	8.56978	8.58119	8.2262	8.24313	8.45631	8.40783	8.33478	8.35809	8.36884	8.59322	8.4187	8.40958	8.37208	8.35401	8.45068	8.40573	8.47402	8.4975	chr9	108306129	108337934	31806	+	HAVANA	gene	NA	NA
ENSMUSG00000007817.14	protein_coding	Zmiz1	6.05198	5.40961	5.51405	6.54548	6.22718	7.10315	6.49197	6.26601	6.51136	6.83936	6.94738	7.30946	7.04608	6.54886	6.44237	6.35883	7.20785	7.06254	7.19574	5.90627	5.89223	6.89439	6.89835	6.55754	6.53465	6.50376	7.0904	6.48295	6.25814	6.05181	6.1956	6.09694	7.06181	7.0102	7.00992	chr14	25459185	25666743	207559	+	HAVANA	gene	NA	NA
ENSMUSG00000007827.10	protein_coding	Ankrd26	4.79072	4.65177	4.72419	5.20441	5.00303	5.06865	4.84688	4.81487	4.79749	5.04685	4.84847	4.91474	4.51711	4.85304	4.71657	4.78914	5.0724	4.93286	5.09648	4.69615	4.68662	4.86656	4.68105	4.9734	4.90619	5.05223	5.25424	4.94235	4.87011	4.69404	4.72442	4.59099	4.88611	5.1498	5.09342	chr6	118501308	118562226	60919	-	HAVANA	gene	NA	NA
ENSMUSG00000007833.15	protein_coding	Aldh16a1	4.76767	5.02782	5.02858	4.3579	4.16001	4.94504	4.97944	4.49423	4.47178	4.18364	4.68174	4.71996	4.74659	4.29853	4.11032	4.20805	5.09972	4.86173	4.82806	3.95728	3.87158	4.61623	4.68643	4.35591	4.44175	4.31187	5.09026	4.70128	4.73557	3.7733	4.30781	4.13253	4.77306	4.73627	4.59059	chr7	45140684	45154584	13901	-	HAVANA	gene	NA	NA
ENSMUSG00000007836.6	protein_coding	Hnrnpa0	7.15359	6.70928	6.73539	7.69366	7.49228	7.74272	7.35171	7.71789	7.77853	7.73332	7.80058	7.98496	7.45732	7.52753	7.50692	7.38674	7.90304	7.8649	8.00297	7.16501	7.2159	7.73714	7.6808	7.57556	7.40832	7.61024	7.82847	7.30946	7.20695	7.23633	7.1657	7.40024	7.77346	7.69537	7.76131	chr13	58125879	58128556	2678	-	ENSEMBL	gene	NA	NA
ENSMUSG00000007850.16	protein_coding	Hnrnph1	8.64615	8.71234	8.75561	8.71515	8.43577	8.63007	8.36867	8.61096	8.53155	8.62546	8.5772	8.70028	8.44774	8.55509	8.50686	8.58148	8.80358	8.69119	8.84843	8.38572	8.55109	8.69762	8.58985	8.62915	8.44305	8.65109	8.76429	8.43956	8.35277	8.3467	8.20945	8.56234	8.49026	8.43059	8.69326	chr11	50376990	50386528	9539	+	HAVANA	gene	NA	NA
ENSMUSG00000007872.3	protein_coding	Id3	4.66936	5.40443	5.20946	3.94307	3.66864	4.02005	3.91774	4.10809	4.15785	4.11812	3.7081	3.02767	4.06017	5.23461	4.56597	4.42112	3.98769	3.48774	3.23874	4.28389	4.23255	2.80618	2.7764	4.39559	4.2003	3.94081	4.55515	4.52159	4.59629	4.83465	5.08994	4.92242	3.32482	3.78111	3.08953	chr4	136143497	136145755	2259	+	HAVANA	gene	NA	NA
ENSMUSG00000007880.16	protein_coding	Arid1a	8.13353	7.3146	7.55537	8.5761	8.67738	8.93691	8.77851	8.72241	8.71469	8.65882	8.83125	8.69155	8.82259	8.87771	8.86282	8.82214	8.88027	8.76488	8.81465	9.15924	9.06372	8.82363	8.95293	8.71886	8.74493	8.62513	9.00173	8.93274	8.89331	8.93889	8.97657	8.94683	8.79799	8.85353	8.76346	chr4	133679008	133756769	77762	-	HAVANA	gene	NA	NA
ENSMUSG00000007891.16	protein_coding	Ctsd	8.06792	8.30831	8.39703	7.3275	7.05492	8.1423	8.38004	7.48126	7.52055	7.11129	8.37102	8.68661	8.04807	7.32005	7.38159	7.54433	7.98811	8.17875	8.26684	7.538	7.68758	8.42002	8.41526	7.1043	7.1317	7.46471	8.19463	8.16768	8.27587	7.22701	7.37307	7.30914	8.01067	7.97679	7.962	chr7	142375911	142388038	12128	-	HAVANA	gene	NA	NA
ENSMUSG00000007892.7	protein_coding	Rplp1	9.603	10.2489	10.1875	8.93316	8.86733	8.98535	9.06697	9.22029	9.1867	8.9836	9.09709	9.02407	8.94459	9.08031	9.13158	9.02134	8.89919	9.00045	8.92571	8.80787	8.94129	8.87428	9.00629	8.95866	9.05292	8.90041	9.07206	9.12494	8.97467	8.92109	8.96912	9.00911	8.92038	8.93885	8.76965	chr9	61913284	61914538	1255	-	ENSEMBL	gene	NA	NA
ENSMUSG00000007950.8	protein_coding	Abhd8	5.62032	6.21808	5.9676	5.04022	4.71996	5.22284	5.35324	5.20515	5.28154	5.01645	5.50224	5.11571	5.38849	5.21288	5.14159	5.03857	5.28015	5.22271	5.09968	5.29533	5.22711	4.93935	5.03295	5.20581	5.12725	5.10681	5.3017	5.31323	5.31743	4.79848	5.11816	5.09655	5.15578	5.30906	4.54322	chr8	71456700	71463657	6958	-	ENSEMBL	gene	NA	NA
ENSMUSG00000008035.12	protein_coding	Mid1ip1	3.87528	3.54248	3.37807	4.33006	3.59355	5.31991	4.84164	3.69667	3.7512	3.80734	4.68039	5.2977	4.96925	3.56823	3.88906	3.82226	4.82791	5.11143	5.3924	2.92055	3.30544	4.77103	4.95317	3.85818	4.0407	3.97359	5.45867	4.69979	4.49413	3.03897	3.19734	3.56977	4.80478	4.71029	4.59385	chrX	10715013	10719690	4678	+	HAVANA	gene	NA	NA
ENSMUSG00000008036.11	protein_coding	Ap2s1	5.39095	5.40111	5.40074	5.16436	5.13373	5.90102	5.84194	5.07425	5.2687	5.15752	5.67683	5.9015	5.77453	5.01933	5.16568	5.09569	5.73494	5.78627	5.7202	4.54791	4.52418	5.55686	5.4888	5.21437	5.17659	5.24748	5.86933	5.7124	5.56357	5.06909	4.99678	4.82395	5.71048	5.77627	5.49668	chr7	16738410	16749294	10885	+	HAVANA	gene	NA	NA
ENSMUSG00000008140.17	protein_coding	Emc10	5.58262	5.78292	5.68427	5.47856	5.53162	5.25407	5.16893	5.4799	5.42726	5.19153	5.22383	5.31304	4.83305	5.68843	5.68226	5.57585	5.64554	5.55881	5.50893	5.47214	5.49958	5.36005	5.5405	5.6438	5.67276	5.50881	5.40122	4.83544	4.88402	5.70374	5.56676	5.67864	5.50056	5.66553	5.31748	chr7	44489937	44496529	6593	-	HAVANA	gene	NA	NA
ENSMUSG00000008200.14	protein_coding	Fnbp4	7.58781	7.48074	7.69638	7.51834	7.53806	7.60031	7.51199	7.63607	7.63089	7.46092	7.47181	7.48343	7.56902	7.4927	7.46907	7.57617	7.6995	7.78445	7.68831	7.52814	7.70967	7.61284	7.7959	7.56187	7.50041	7.54324	7.5896	7.82086	7.75563	7.52905	7.42951	7.49662	7.59901	7.60335	7.57926	chr2	90745370	90781021	35652	+	HAVANA	gene	NA	NA
ENSMUSG00000008206.16	protein_coding	Cers4	4.77069	5.1218	4.94144	4.43751	4.588	4.56996	4.28444	4.58818	4.43768	4.43716	4.62826	4.51151	4.47072	4.64044	4.91547	4.68558	4.28836	4.37494	4.28323	4.97214	4.96485	4.31201	4.34538	4.56314	4.75469	4.50054	4.2726	4.48374	4.58781	4.74217	4.73053	4.6924	3.93945	4.2047	4.10511	chr8	4493026	4531680	38655	+	HAVANA	gene	NA	NA
ENSMUSG00000008301.11	protein_coding	Phax	4.92498	4.91913	4.92438	5.02261	4.92203	5.12296	4.97648	4.69965	4.93967	5.21377	4.95256	5.07187	5.16698	4.7553	4.94549	4.87941	4.95824	4.95367	5.08669	4.4335	4.42243	4.83224	4.76369	4.96051	4.78626	4.96717	5.06794	5.26583	5.32425	4.64395	4.8531	4.6494	5.04505	5.07921	4.94089	chr18	56562443	56587712	25270	+	HAVANA	gene	NA	NA
ENSMUSG00000008307.11	protein_coding	1700109H08Rik	3.7369	3.2859	3.33212	4.06963	4.38232	3.68578	3.58303	4.23269	4.2601	4.64593	4.11179	4.14453	3.67717	4.40153	4.68656	4.31188	4.42112	4.11156	4.16004	4.39062	4.29895	4.17767	4.04879	4.29609	4.83435	3.99054	3.37545	3.64287	3.50906	4.38199	4.49265	4.19541	4.30399	4.31925	4.13017	chr5	3571566	3584356	12791	+	HAVANA	gene	NA	NA
ENSMUSG00000008318.10	protein_coding	Relt	5.02121	5.45904	5.37607	4.56962	4.62079	4.56735	4.40349	4.71622	4.70524	4.6361	4.80042	4.9329	4.59423	4.59042	4.59628	4.58417	4.75587	4.7082	4.78864	4.58642	4.40586	4.6809	4.64607	4.649	4.69949	4.66261	4.38019	4.25047	4.5211	4.70386	4.41138	4.73643	4.72414	4.87676	4.49076	chr7	100845847	100863446	17600	-	HAVANA	gene	NA	NA
ENSMUSG00000008333.12	protein_coding	Snrpb2	5.44171	5.2895	5.26778	5.81613	5.59625	5.88116	5.54594	5.3117	5.67464	5.91996	5.91868	6.20179	5.83553	5.21288	5.57979	5.49908	6.08506	5.98961	6.00944	4.28815	4.48686	5.79963	5.63153	5.57234	5.46836	5.73597	5.81396	5.65722	5.57934	5.09169	4.93996	5.27279	5.9205	5.90201	6.11476	chr2	143063039	143072853	9815	+	HAVANA	gene	NA	NA
ENSMUSG00000008348.9	protein_coding	Ubc	7.85589	7.88491	7.90063	7.74619	7.93184	7.90292	7.91751	7.75338	7.93278	7.90543	7.56116	7.84547	7.76451	7.75667	8.02482	7.64763	7.58531	7.85304	7.76035	7.89742	7.81761	7.77693	7.76909	7.83347	7.95506	7.70692	7.94344	7.83239	7.88993	7.90208	7.93444	7.89112	7.76691	7.78478	7.61752	chr5	125385965	125390202	4238	-	HAVANA	gene	NA	NA
ENSMUSG00000008373.16	protein_coding	Prpf31	6.02162	5.81923	5.73911	6.83846	6.65108	5.95278	5.27355	6.27867	6.53946	6.7428	6.34923	6.73442	5.8823	6.29564	6.3573	6.33487	6.55961	6.79528	6.72986	5.25966	5.38195	6.55099	6.48686	6.66028	6.61484	6.74863	6.02923	5.19881	4.99645	6.04885	6.05703	6.02627	6.73504	6.67966	6.66021	chr7	3629985	3642486	12502	+	HAVANA	gene	NA	NA
ENSMUSG00000008384.8	protein_coding	Sertad1	3.92541	4.20599	4.26196	3.32314	3.66864	3.92519	3.87735	3.95037	3.83906	3.29626	3.85311	3.8463	3.56539	3.61717	3.41962	3.51661	3.60963	3.45814	3.56016	3.52146	3.65862	3.50839	3.4087	3.64675	3.4774	3.63751	3.69926	3.39563	3.76613	3.64929	3.73556	3.94776	3.56602	3.47389	3.32085	chr7	27486910	27490316	3407	+	HAVANA	gene	NA	NA
ENSMUSG00000008393.8	protein_coding	Carhsp1	4.67312	4.44962	4.64538	4.13885	4.44884	5.45419	5.68698	4.6343	4.81685	4.67326	5.10027	5.23028	5.71502	4.54067	4.43791	4.46961	4.80619	4.87989	4.9392	4.87083	4.51494	4.78238	4.82768	4.22984	4.41767	4.30834	5.41617	5.23129	5.3777	4.47661	4.34926	4.39151	4.85109	4.76628	4.7754	chr16	8658587	8672153	13567	-	ENSEMBL	gene	NA	NA
ENSMUSG00000008398.14	protein_coding	Elk3	5.71466	5.86187	5.82554	5.21285	5.44272	5.71506	5.84456	5.1305	5.20399	5.18189	5.25854	5.60571	5.03952	5.87985	6.05492	5.78552	5.4497	5.21977	5.59877	6.0648	6.0131	5.64551	5.66569	5.43405	5.61278	5.35558	5.49995	5.66505	5.97031	6.00297	6.04698	5.88808	5.43788	5.44314	5.37007	chr10	93247414	93311135	63722	-	HAVANA	gene	NA	NA
ENSMUSG00000008429.7	protein_coding	Herpud2	4.7081	4.42979	4.62941	4.77926	4.87297	4.9043	5.05132	5.01903	4.97749	4.7729	4.79868	4.76465	4.94267	5.04639	5.06287	5.11106	4.53471	4.61962	4.77673	5.32254	5.26251	4.76341	4.75075	4.73481	4.76279	4.61924	4.891	5.17938	5.17564	5.09542	4.91337	5.05856	4.64457	4.43683	4.72582	chr9	25108130	25151781	43652	-	ENSEMBL	gene	NA	NA
ENSMUSG00000008435.15	protein_coding	Rdh13	3.84147	3.7185	3.90138	4.25511	4.03584	3.25646	2.86593	4.05095	4.06642	4.37085	3.93169	3.95693	3.70271	4.17417	3.87114	4.04263	3.93692	4.03737	3.85352	3.91169	3.75596	4.03036	3.78387	4.27637	4.18431	4.22911	3.36519	3.2644	2.76594	4.02299	3.97034	4.18663	4.02686	3.94885	3.80436	chr7	4424770	4445649	20880	-	HAVANA	gene	NA	NA
ENSMUSG00000008450.7	protein_coding	Nutf2	4.46464	4.02605	3.99459	5.44151	5.14804	4.80423	4.15948	4.87142	5.36268	5.44352	5.38834	5.73105	4.99408	4.71137	4.78011	4.6996	5.4212	5.56686	5.59206	3.34132	3.65026	5.37831	5.38486	5.24895	5.22871	5.22673	5.13737	3.88463	3.56237	4.16125	4.28551	4.34588	5.57418	5.4863	5.39462	chr8	105860634	105880402	19769	+	ENSEMBL	gene	NA	NA
ENSMUSG00000008475.13	protein_coding	Arpc5	7.97202	8.00524	7.97676	7.79293	7.81332	8.31359	8.10301	7.76159	7.87638	7.87859	8.15568	8.3913	8.05698	7.93928	7.93226	7.88663	8.09013	8.0598	8.12913	7.59191	7.64655	8.05461	7.90421	7.78172	7.72189	7.76485	8.26816	8.158	8.22233	7.84059	7.76083	7.85833	7.87966	7.88949	7.97373	chr1	152766542	152775597	9056	+	HAVANA	gene	NA	NA
ENSMUSG00000008496.19	protein_coding	Pou2f2	5.17671	5.06091	5.14397	5.4117	5.61806	5.12487	5.44246	5.4799	5.53934	5.64515	5.19757	5.03563	4.82725	5.38351	5.51491	5.41025	4.87078	4.55816	4.85078	5.04936	4.70299	4.8342	4.49963	5.80098	5.74677	5.74074	5.50694	5.68828	5.5549	5.35095	5.47883	5.30965	5.08435	4.94451	4.82804	chr7	25087344	25179726	92383	-	HAVANA	gene	NA	NA
ENSMUSG00000008604.11	protein_coding	Ubqln4	5.78536	5.6892	5.77053	6.26006	6.0738	5.50016	5.17727	5.84647	6.07323	6.14493	6.0776	6.10099	5.56969	5.74182	5.72778	5.73186	6.04766	6.12528	6.10889	5.53256	5.59766	5.98871	5.97751	6.12084	6.30155	6.11684	5.7797	4.78844	4.7886	5.63103	5.61376	5.65019	6.28526	6.21894	6.20799	chr3	88553758	88569725	15968	+	HAVANA	gene	NA	NA
ENSMUSG00000008668.14	protein_coding	Rps18	9.85457	10.0463	10.067	9.62104	9.69091	9.66963	9.77225	9.9916	9.86739	9.81012	9.83938	9.82208	9.74097	9.75925	9.85746	9.82561	9.44506	9.60676	9.57677	9.24143	9.43336	9.41123	9.3926	9.58427	9.38072	9.65123	9.73146	9.74276	9.71158	9.67723	9.66146	9.61925	9.5736	9.5996	9.5707	chr17	33951999	33956001	4003	-	HAVANA	gene	NA	NA
ENSMUSG00000008682.13	protein_coding	Rpl10	9.96384	10.0322	9.9966	9.99087	10.0122	10.0854	9.97768	10.0243	10.0704	10.0533	9.95519	10.136	9.80456	9.89997	10.0357	9.97539	9.89474	9.98591	9.99925	9.26537	9.41246	9.84566	9.73356	9.88073	9.91529	9.89666	10.1374	9.95586	9.8815	9.80927	9.79196	9.80424	10.0238	9.99032	9.98019	chrX	74270812	74273135	2324	+	HAVANA	gene	NA	NA
ENSMUSG00000008683.16	protein_coding	Rps15a	9.59833	10.0571	10.0352	9.16598	9.13639	9.14411	9.07831	9.41589	9.29185	9.18401	9.25976	9.25069	9.0937	9.2715	9.39012	9.33338	9.02204	9.06198	9.08917	9.0847	9.23257	9.01277	8.95638	9.08015	9.01592	9.10498	9.08225	9.24172	9.23595	9.19356	9.14548	9.16986	9.01953	9.04105	9.00997	chr7	118104372	118116188	11817	-	HAVANA	gene	NA	NA
ENSMUSG00000008690.15	protein_coding	Ncaph2	6.88798	6.80356	6.75085	7.0098	6.61811	7.806	7.50534	6.82701	6.8998	6.86957	7.26259	7.44765	7.33479	6.64166	6.67903	6.69532	7.4787	7.55795	7.40482	6.07254	6.1118	7.14362	7.15737	6.75237	6.7472	6.90829	7.7931	7.45666	7.33909	6.20443	6.20784	6.24265	7.28735	7.28621	7.21126	chr15	89355719	89372826	17108	+	HAVANA	gene	NA	NA
ENSMUSG00000008730.17	protein_coding	Hipk1	8.43063	8.11005	8.20326	8.54773	8.49476	9.17262	9.01156	8.59543	8.51421	8.4779	8.8483	8.66172	9.01877	8.611	8.57988	8.60896	8.78241	8.68778	8.79153	8.51916	8.68515	8.63034	8.71983	8.50996	8.48244	8.5124	9.13742	9.11023	9.18706	8.61056	8.59906	8.6346	8.57323	8.61519	8.616	chr3	103739815	103791563	51749	-	HAVANA	gene	NA	NA
ENSMUSG00000008763.16	protein_coding	Man1a2	6.77571	6.79506	6.91934	6.74635	6.74742	6.80319	6.77771	6.5443	6.54905	6.74979	6.68406	6.63793	6.72523	6.66038	6.62257	6.66378	6.59183	6.64265	6.66053	6.77569	6.78299	6.60209	6.55487	6.63419	6.5789	6.69963	6.77384	6.88538	6.94566	6.7387	6.80114	6.81899	6.5623	6.56008	6.69393	chr3	100562208	100685503	123296	-	HAVANA	gene	NA	NA
ENSMUSG00000008855.17	protein_coding	Hdac5	5.12518	5.28589	5.37128	4.4462	4.62618	5.66089	5.93342	4.61909	4.74454	4.40162	4.51797	4.35192	5.91701	5.07733	5.01266	4.93227	4.32367	4.17414	4.5936	5.65125	5.36549	4.25067	4.36272	4.66158	4.65666	4.39257	5.74696	6.05283	6.07108	5.32575	5.37744	5.26864	4.3896	4.35288	4.23837	chr11	102194432	102230166	35735	-	HAVANA	gene	NA	NA
ENSMUSG00000008859.7	protein_coding	Rala	4.64538	4.82932	4.69993	4.54755	4.50261	4.65617	4.54558	4.21312	4.37591	3.95797	4.62629	4.80859	4.1341	4.38318	4.56039	4.52803	4.61495	4.53236	4.53096	4.81884	4.64204	4.63781	4.69936	4.3497	4.38306	4.38954	4.45448	4.42964	4.58781	4.51613	4.71829	4.68125	4.70745	4.48008	4.82333	chr13	17880575	17944239	63665	-	HAVANA	gene	NA	NA
ENSMUSG00000008892.12	protein_coding	Vdac3	6.1495	5.87695	5.94332	6.60362	6.31607	6.81548	6.45997	6.24906	6.37333	6.57224	6.53824	6.90643	6.50671	6.17977	6.22934	6.19625	6.64074	6.71066	6.7288	5.51268	5.52496	6.60953	6.34086	6.41695	6.51068	6.42837	6.82209	6.35026	6.28403	5.88136	5.93889	5.80433	6.63949	6.62889	6.72369	chr8	22577075	22593813	16739	-	HAVANA	gene	NA	NA
ENSMUSG00000008958.14	protein_coding	Vps72	4.61492	4.70669	4.66275	4.53189	4.41808	4.53291	4.44553	4.61032	4.54222	4.35664	4.39856	4.60619	4.39168	4.54687	4.42261	4.46364	4.43457	4.49883	4.59587	4.82178	4.63068	4.62525	4.69023	4.6028	4.57622	4.69245	4.68919	4.51005	4.48503	4.41223	4.65551	4.71827	4.48405	4.56863	4.48481	chr3	95111022	95123051	12030	+	HAVANA	gene	NA	NA
ENSMUSG00000008976.16	protein_coding	Gabpa	6.33733	6.22162	6.32335	6.35691	6.36581	6.6581	6.38389	6.25415	6.31822	6.60581	6.6157	6.74547	6.69722	6.26114	6.26829	6.20407	6.57617	6.5867	6.64638	5.93973	6.05052	6.5115	6.46305	6.21602	6.29702	6.32501	6.6203	6.56246	6.5688	6.08222	6.18384	6.14706	6.44844	6.40999	6.49963	chr16	84834925	84863779	28855	+	HAVANA	gene	NA	NA
ENSMUSG00000009013.5	protein_coding	Dynll1	6.33729	6.2453	6.3366	6.58503	6.39612	6.3415	6.0561	6.28201	6.31202	6.56136	6.73334	6.89205	6.19447	6.10675	6.15921	6.2658	6.76918	6.73605	6.79939	5.65291	5.80375	6.82108	6.6188	6.38704	6.28008	6.5178	6.41758	5.79556	5.73206	6.11935	6.23048	6.08989	6.94453	6.79721	6.87768	chr5	115297110	115300999	3890	-	HAVANA	gene	NA	NA
ENSMUSG00000009030.14	protein_coding	Pdcl	4.97603	5.28499	5.21632	4.66087	4.61537	4.91462	4.58999	4.66	4.62512	4.61954	4.80738	5.0272	4.84267	4.74707	4.6989	4.66448	4.6986	4.74135	4.80837	4.67681	4.68662	4.93766	4.6718	4.7631	4.47138	4.63213	4.99622	4.76921	4.65429	4.65411	4.49265	4.82395	4.51634	4.50423	4.47284	chr2	37350074	37359332	9259	-	HAVANA	gene	NA	NA
ENSMUSG00000009035.13	protein_coding	Tmem184b	4.43815	4.08682	4.37546	4.59997	4.71491	4.52754	4.66902	4.73448	4.88419	4.73606	4.76866	4.94905	4.52908	4.57502	4.57707	4.46663	4.51753	4.59036	4.79264	4.59332	4.54552	4.62945	4.81514	4.80904	4.81045	4.68999	4.78904	4.23306	4.30363	4.53274	4.85868	4.68125	4.72966	4.44309	4.54894	chr15	79360684	79403303	42620	-	ENSEMBL	gene	NA	NA
ENSMUSG00000009073.16	protein_coding	Nf2	5.83478	5.62507	5.63873	6.45469	6.15812	5.99061	5.87565	6.07067	6.14904	6.45803	6.13892	6.22556	5.98286	5.85838	6.03896	5.93225	6.17999	6.11662	6.18093	5.71584	5.71259	6.04556	5.97093	6.15681	6.37561	6.27314	5.9153	5.71742	5.78988	5.75655	5.83103	5.8102	6.17429	6.16316	5.9859	chr11	4765845	4849536	83692	-	HAVANA	gene	NA	NA
ENSMUSG00000009076.10	protein_coding	Zmat5	3.40703	3.66242	3.42952	3.33443	3.25808	3.16199	3.52917	3.05648	3.1686	2.86831	3.22072	3.5243	2.67028	3.29451	3.59013	3.23518	3.27907	3.46098	3.37575	2.98308	3.16372	3.39046	3.24948	3.45202	3.4728	3.28725	3.4712	3.29222	3.44065	3.14275	3.31998	3.17278	3.36807	3.31054	3.03406	chr11	4704678	4737669	32992	+	HAVANA	gene	NA	NA
ENSMUSG00000009079.16	protein_coding	Ewsr1	8.16079	8.0168	8.11596	8.36545	8.20928	8.36527	8.1546	8.20036	8.29795	8.30302	8.31737	8.53658	8.32781	8.15119	8.17721	8.16849	8.48901	8.59327	8.53379	7.769	7.8451	8.29396	8.44379	8.26628	8.20002	8.33345	8.43189	8.22716	8.09315	7.98339	7.97072	7.93892	8.44393	8.41347	8.32116	chr11	5069689	5099266	29578	-	HAVANA	gene	NA	NA
ENSMUSG00000009090.17	protein_coding	Ap1b1	6.66126	6.81833	6.84663	6.49274	6.553	6.47027	6.59519	6.54199	6.56584	6.43725	6.41275	6.49246	6.41553	6.56224	6.57908	6.57445	6.47584	6.37274	6.40187	6.53648	6.47048	6.3284	6.34481	6.46731	6.63881	6.45969	6.53248	6.59916	6.67852	6.41798	6.60576	6.49202	6.37427	6.46946	6.32249	chr11	4986824	5042791	55968	+	HAVANA	gene	NA	NA
ENSMUSG00000009112.4	protein_coding	Bcl2l13	5.93617	5.77844	5.7559	6.17422	6.14127	6.11133	6.11156	5.90587	5.95956	5.98974	5.86546	6.10099	5.73479	6.26774	6.21356	6.06837	6.25358	6.23096	6.1665	5.88549	5.93067	6.19956	6.05154	6.2956	6.3071	6.16198	6.18775	6.17296	6.05886	6.00297	6.04698	6.14984	6.24343	6.22076	6.15465	chr6	120836212	120892842	56631	+	HAVANA	gene	NA	NA
ENSMUSG00000009207.15	protein_coding	Lnp	4.97266	4.81939	4.80888	5.2516	5.09146	5.28465	4.79362	5.09481	4.84856	5.18993	5.50224	5.57943	5.19028	4.94698	5.13972	4.98952	5.55725	5.46023	5.65207	4.70254	4.72185	5.57764	5.16729	5.06144	5.23015	5.08447	5.29201	4.80506	4.59629	4.87864	4.57637	5.10589	5.28134	5.03016	5.51431	chr2	74520291	74579435	59145	-	HAVANA	gene	NA	NA
ENSMUSG00000009291.12	protein_coding	Pttg1ip	5.30819	5.68716	5.6538	4.65675	4.98215	5.02166	5.16474	4.98045	4.82325	4.58584	4.90961	4.72559	5.13968	5.09903	5.04898	5.01016	4.71628	4.83645	4.68168	5.55038	5.3672	4.85585	4.89079	4.871	4.88161	4.74324	5.02576	4.88542	5.02049	5.07666	5.32192	5.31369	4.69057	4.77623	4.61579	chr10	77581720	77598732	17013	+	HAVANA	gene	NA	NA
ENSMUSG00000009293.17	protein_coding	Ube2g2	4.84233	4.79678	4.77734	4.93943	4.81275	4.94314	4.65714	4.82886	4.76794	4.77175	5.0846	5.31995	4.69616	4.84021	4.67069	4.75286	5.22126	5.24447	5.28652	4.61719	4.53945	5.12027	5.18851	4.90312	4.8	4.86691	5.03741	4.58347	4.55629	4.70874	4.60324	4.61081	5.36883	5.25316	5.12792	chr10	77622275	77645993	23719	+	HAVANA	gene	NA	NA
ENSMUSG00000009406.13	protein_coding	Elk1	3.78792	3.69424	3.62376	4.0027	3.8269	3.86257	4.03254	4.00488	3.81036	3.84852	3.93169	3.93907	3.54196	3.96319	3.93722	3.93449	3.93261	3.78262	3.81898	4.28815	4.14741	3.90442	3.89132	3.91391	3.90578	3.76471	3.70414	3.98887	4.07198	4.14326	3.95998	3.9786	3.79384	3.96634	3.74586	chrX	20933395	20950608	17214	-	HAVANA	gene	NA	NA
ENSMUSG00000009470.16	protein_coding	Tnpo1	8.01653	7.77417	7.8666	8.50756	8.27085	8.21551	7.85064	8.1204	8.15478	8.36438	8.30721	8.60514	8.0878	8.02508	7.95741	8.05673	8.51277	8.58755	8.57393	7.64552	7.87496	8.42861	8.28508	8.28438	8.35934	8.40453	8.22636	7.94497	7.80218	8.04932	7.86229	8.0065	8.4943	8.4128	8.52665	chr13	98839019	98926384	87366	-	HAVANA	gene	NA	NA
ENSMUSG00000009535.13	protein_coding	Rnmt	5.83735	5.83506	5.8072	6.0726	6.0195	5.68883	5.67525	5.88876	5.95439	6.18568	5.70414	5.88853	5.70872	5.92915	6.00135	5.87713	5.82378	5.81282	5.80108	5.73623	5.87187	5.70935	5.66336	5.95399	5.95198	5.96413	5.7074	5.63747	5.67983	5.98094	5.90036	5.88808	5.77061	5.81298	6.05378	chr18	68300355	68324852	24498	+	HAVANA	gene	NA	NA
ENSMUSG00000009549.14	protein_coding	Srp14	5.31708	5.51397	5.48658	5.07921	4.87297	5.19939	5.02383	5.12589	5.26401	5.24186	5.37326	5.54561	5.36598	5.10118	5.09217	5.05852	5.29703	5.2774	5.3594	4.80407	4.90513	5.2902	5.21102	5.10997	4.88903	5.21186	5.23075	4.9573	5.07812	4.82119	4.73661	4.96924	5.3221	5.24959	5.22058	chr2	118475850	118479711	3862	-	HAVANA	gene	NA	NA
ENSMUSG00000009555.16	protein_coding	Cdk9	5.79518	5.46781	5.51467	6.07337	5.97581	6.14679	5.92106	6.09992	6.19602	6.14576	6.34498	6.55419	6.32304	6.00467	5.97852	5.98115	6.28606	6.25646	6.26957	5.89109	5.8634	6.14784	6.1472	6.04223	6.13785	6.04733	6.14711	5.93802	5.94398	5.92331	5.9845	5.84689	6.27019	6.16694	6.11668	chr2	32705784	32713076	7293	-	HAVANA	gene	NA	NA
ENSMUSG00000009563.16	protein_coding	Tor2a	4.46606	4.74784	4.77574	4.04743	4.23958	4.22307	4.21369	4.16003	4.30676	4.00961	4.4237	4.53427	4.04024	4.02345	4.06489	4.07825	4.3975	4.3046	4.29445	3.93895	3.94212	4.41281	4.24608	4.05393	4.17613	4.13081	4.19151	3.99716	3.90001	3.99129	3.82955	3.95811	4.46419	4.59697	4.25943	chr2	32757234	32762244	5011	+	HAVANA	gene	NA	NA
ENSMUSG00000009566.12	protein_coding	Fpgs	3.82716	4.10738	4.31883	4.23315	3.83624	2.61235	1.73392	3.40393	3.8672	4.03135	3.44785	3.73479	3.04502	3.58062	3.76839	3.40881	3.49732	3.89735	3.73089	3.14355	3.5177	3.56645	3.58647	3.97499	4.15998	4.1878	2.8874	1.97668	1.52624	3.33307	3.73556	3.28725	3.78326	3.85808	3.76563	chr2	32682609	32704145	21537	-	HAVANA	gene	NA	NA
ENSMUSG00000009569.14	protein_coding	Mkl2	5.0749	4.78279	4.76236	5.40396	5.42735	5.22947	5.59346	5.43942	5.38782	5.29045	5.19082	5.38337	4.91375	5.71098	5.59069	5.63286	5.28684	5.13657	5.19248	5.65455	5.44048	5.21652	5.18003	5.57875	5.58351	5.41347	5.28868	5.27794	5.44795	5.47932	5.61376	5.41488	5.20812	5.22073	5.2419	chr16	13256481	13417529	161049	+	HAVANA	gene	NA	NA
ENSMUSG00000009575.14	protein_coding	Cbx5	7.97837	7.15638	7.20449	9.19986	8.60069	9.57804	9.0444	8.3862	8.55892	8.57187	8.99011	9.39766	8.92257	8.35004	8.53475	8.61475	9.45784	9.4447	9.53624	6.98016	7.35315	9.16519	8.9365	8.81867	8.8719	8.95214	9.66754	8.79241	8.57349	7.91903	7.7398	7.92517	9.32786	9.23416	9.39605	chr15	103191544	103239816	48273	-	HAVANA	gene	NA	NA
ENSMUSG00000009585.17	protein_coding	Apobec3	7.95003	7.65222	7.60431	8.13606	7.95465	8.88352	8.91619	8.05127	8.1267	8.07919	8.16073	8.27598	8.461	7.75533	7.95068	7.98996	8.48501	8.49117	8.57733	7.72343	7.7077	8.37296	8.4216	8.12372	8.22058	8.13949	8.93986	9.15	9.0624	7.78366	7.71345	7.81185	8.3944	8.45228	8.38555	chr15	79891659	79915906	24248	+	HAVANA	gene	NA	NA
ENSMUSG00000009621.18	protein_coding	Vav2	4.62528	5.65191	5.53881	4.26326	4.3993	3.46753	3.3372	4.05741	4.13489	4.78144	3.44785	3.67562	4.34642	3.61717	3.43799	3.31903	3.29717	3.40224	3.16121	3.59885	3.36836	3.21643	3.15372	4.88178	4.826	4.25933	3.88694	3.95523	2.94479	3.05439	2.88344	3.05616	3.24999	3.19112	3.29388	chr2	27262104	27427033	164930	-	HAVANA	gene	NA	NA
ENSMUSG00000009630.10	protein_coding	Ppp2cb	5.27329	4.88753	4.93767	5.59721	5.46997	6.11133	5.6515	5.39315	5.48792	5.58305	5.91385	6.26408	5.96975	5.41153	5.4665	5.3255	5.89089	5.98875	6.12312	5.14862	5.08864	5.8802	5.94238	5.3433	5.37985	5.33049	6.03537	5.56124	5.58645	5.11394	5.23011	5.26448	5.90351	5.8768	5.95396	chr8	33599625	33619441	19817	+	HAVANA	gene	NA	NA
ENSMUSG00000009640.11	protein_coding	Dmap1	4.07857	4.43631	4.35618	3.73614	3.62621	3.77462	4.04171	3.72942	3.79091	3.55204	3.81561	4.06627	3.78483	3.45161	3.86209	3.58973	3.75349	3.92646	3.94177	3.61925	3.56622	3.82614	3.76226	3.8138	4.0671	3.77868	3.94582	3.90324	3.59054	3.38229	3.58197	3.67395	3.99054	3.66808	3.73588	chr4	117674681	117682273	7593	-	HAVANA	gene	NA	NA
ENSMUSG00000009647.13	protein_coding	Mcu	3.98739	3.89914	3.83329	4.49546	4.77441	3.6761	3.88756	3.90451	4.03369	4.10118	3.83618	4.19223	3.63347	4.36538	4.35007	4.1282	4.23188	4.17717	4.22286	3.88946	3.9329	4.18661	4.16278	4.2829	4.44142	4.553	3.79387	3.56693	3.60741	4.29378	4.11735	4.0481	4.10537	4.34622	4.1358	chr10	59446984	59616692	169709	-	HAVANA	gene	NA	NA
ENSMUSG00000009681.9	protein_coding	Bcr	4.87612	4.67261	4.62298	5.18309	5.17846	4.88762	5.05132	4.9373	5.00449	5.08009	5.44199	5.61249	4.51471	5.06855	5.11138	5.23196	5.26993	4.95245	5.32972	5.20821	5.0009	5.15264	5.08437	5.13182	5.25334	5.33995	4.92485	4.56964	5.00783	5.17517	5.21712	5.05856	5.1842	5.16502	5.01303	chr10	75060896	75184923	124028	+	ENSEMBL	gene	NA	NA
ENSMUSG00000009687.14	protein_coding	Fxyd5	7.66419	7.67268	7.62888	7.2196	7.41103	7.99318	7.88671	7.43393	7.42545	7.00381	7.61957	7.61606	7.57625	8.03414	7.93953	7.87543	7.42339	7.58435	7.58704	8.21401	8.06924	7.43307	7.62262	7.2834	7.15906	7.41672	7.8385	7.9431	8.10913	8.02654	8.21778	8.1308	7.53898	7.61379	7.43707	chr7	31032722	31042481	9760	-	HAVANA	gene	NA	NA
ENSMUSG00000009739.16	protein_coding	Pou6f1	5.24315	4.96146	4.94921	5.1556	5.59286	6.42299	6.80854	5.73733	5.57468	4.6241	4.93768	4.19915	5.37329	5.29292	5.24733	5.61149	4.96224	4.78456	5.00442	6.31737	6.46098	5.45045	5.95289	5.41273	5.35908	5.41775	6.62705	6.83257	6.89662	5.61635	5.51377	5.6507	4.62101	4.85421	4.67791	chr15	100575318	100599984	24667	-	HAVANA	gene	NA	NA
ENSMUSG00000009741.14	protein_coding	Ubp1	6.56015	6.53303	6.64025	6.37987	6.39318	6.42842	6.38375	6.6354	6.56391	6.59343	6.70167	6.55242	6.69186	6.47925	6.50911	6.50275	6.66727	6.5794	6.49897	6.67599	6.6719	6.48311	6.57767	6.4833	6.5636	6.40532	6.47567	6.58901	6.50032	6.50967	6.51531	6.4717	6.59034	6.55215	6.45131	chr9	113930934	113977199	46266	+	ENSEMBL	gene	NA	NA
ENSMUSG00000009828.15	protein_coding	Ick	3.43247	3.26354	3.19488	3.67636	3.77928	3.79711	3.92767	3.74151	3.63235	3.65779	3.38408	3.4521	3.79676	3.96792	3.84842	3.76025	2.96687	3.06526	3.50811	4.12173	4.12329	3.05109	3.12691	3.66685	3.59094	3.61691	3.76146	3.98054	3.97127	4.02299	4.25076	4.01872	3.32482	3.01744	2.7359	chr9	78109192	78172107	62916	+	HAVANA	gene	NA	NA
ENSMUSG00000009863.14	protein_coding	Sdhb	5.9547	5.78483	5.82904	6.19835	5.89769	6.5859	6.33679	5.74704	5.9522	5.93247	6.41958	6.74511	6.14868	5.69272	5.862	5.68128	6.67357	6.71587	6.7262	4.83347	4.92619	6.46147	6.45602	6.02092	6.04348	6.07213	6.6982	6.1065	5.90356	5.46785	5.35785	5.5579	6.712	6.7437	6.60211	chr4	140961203	140979193	17991	+	HAVANA	gene	NA	NA
ENSMUSG00000009894.15	protein_coding	Snap47	3.6634	3.74498	3.80511	4.09994	3.90884	3.66636	3.42388	3.53937	3.79417	3.62022	3.37941	3.55886	3.42548	3.82418	3.74889	3.66455	3.56575	3.42282	3.42118	3.4243	3.40883	3.44314	3.15372	3.91391	3.92996	3.85104	3.69926	3.1276	3.07182	3.4996	3.34789	3.472	3.6615	3.43673	3.15093	chr11	59407134	59451186	44053	-	HAVANA	gene	NA	NA
ENSMUSG00000009905.5	protein_coding	Kdsr	5.05067	4.89109	4.96427	4.82769	5.17479	5.03497	5.57148	5.17872	5.01151	5.11088	5.09602	4.95439	5.45522	5.35854	5.37568	5.25635	5.0266	5.0955	4.99699	5.35738	5.35862	4.95616	4.97963	5.01907	5.14595	5.0094	5.12736	5.67284	5.69701	5.2707	5.37744	5.42238	5.03171	4.6735	4.93226	chr1	106720459	106759727	39269	-	HAVANA	gene	NA	NA
ENSMUSG00000009907.17	protein_coding	Vps4b	6.82455	6.83352	6.84456	6.70207	6.84431	6.91644	6.89108	6.76517	6.76965	6.7644	6.84202	6.91552	6.92317	6.75158	6.81061	6.77349	6.79792	6.82329	6.84062	6.76657	6.81158	6.77731	6.67135	6.70029	6.68288	6.66931	6.76043	6.95193	6.95832	6.91272	6.95896	6.90178	6.6881	6.69208	6.88674	chr1	106764071	106796728	32658	-	HAVANA	gene	NA	NA
ENSMUSG00000009927.8	protein_coding	Rps25	9.01522	9.16788	9.21796	9.04347	8.86966	8.95196	8.73063	8.98895	9.0789	9.05985	8.8445	9.01534	8.85516	8.87835	9.03173	8.97803	8.79071	8.89955	8.91346	8.20727	8.44915	8.6943	8.73159	8.86331	8.78436	8.92597	8.93503	8.8926	8.79734	8.65444	8.73291	8.72355	8.82996	8.85956	8.78919	chr9	44407714	44410405	2692	+	ENSEMBL	gene	NA	NA
ENSMUSG00000009995.17	protein_coding	Taz	5.6131	6.17399	6.04669	5.08535	5.23603	4.45299	4.75513	5.52722	5.39326	4.88998	4.90312	4.56719	4.42279	5.58611	5.39931	5.5165	4.65738	4.7103	4.70498	6.04608	5.99217	5.10672	5.2962	5.31333	5.33347	5.22893	4.59774	4.65333	4.80088	5.71591	5.63994	5.65974	4.78371	4.91329	4.81861	chrX	74281912	74290151	8240	+	HAVANA	gene	NA	NA
ENSMUSG00000010025.19	protein_coding	Aldh3a2	5.35965	5.60651	5.47232	4.86922	5.03176	5.17726	5.42855	5.26779	5.19415	4.86811	5.32677	5.24053	5.04453	5.06194	5.14159	5.28034	4.91298	4.94536	5.06079	5.59398	5.56371	5.37012	5.28412	4.99144	4.92075	5.07695	5.08869	5.32809	5.34285	5.2707	5.4752	5.40734	5.13514	5.02182	5.03355	chr11	61223417	61267464	44048	-	HAVANA	gene	NA	NA
ENSMUSG00000010045.2	protein_coding	Tmem115	4.65651	4.73207	4.80034	4.50465	4.5769	4.404	4.43165	4.41532	4.58614	4.58096	4.68418	4.71093	4.26004	4.53418	4.72158	4.31231	4.54605	4.76168	4.68807	4.53365	4.54854	4.63781	4.66948	4.54153	4.73561	4.46352	4.57394	4.37342	4.30363	4.55459	4.47821	4.43664	4.67349	4.80081	4.45469	chr9	107533945	107538673	4729	+	HAVANA	gene	NA	NA
ENSMUSG00000010048.10	protein_coding	Ifrd2	4.9007	4.76866	5.0011	5.81798	5.37706	4.37439	3.32223	4.95298	5.33848	5.63341	5.12557	5.44037	4.57597	5.03517	5.07857	4.93659	5.44516	5.63354	5.61452	3.75454	4.01821	5.29813	5.18851	5.54817	5.56726	5.66499	4.67931	2.44511	2.39032	4.69404	4.69974	4.71217	5.76525	5.5658	5.63472	chr9	107587642	107593385	5744	+	HAVANA	gene	NA	NA
ENSMUSG00000010054.4	protein_coding	Tusc2	4.12821	4.44633	4.34814	4.20606	4.111	3.31755	3.11204	3.96009	4.10524	3.97629	3.76225	3.81668	3.51343	4.23874	4.03031	4.16397	3.77913	4.07615	3.75987	3.94408	3.77585	4.04573	3.95706	4.29428	4.16639	4.27851	3.23507	3.17565	3.18857	3.8658	4.06604	3.93994	3.86116	3.99755	3.77326	chr9	107563255	107566112	2858	+	HAVANA	gene	NA	NA
ENSMUSG00000010057.8	protein_coding	Nprl2	4.06101	4.50919	4.5485	3.39413	3.54881	3.71915	3.86708	3.82341	3.65404	3.24782	3.88965	3.88413	3.95412	3.61717	3.33062	3.48156	3.47377	3.45315	3.38234	3.60568	3.7972	3.45737	3.5159	3.42867	3.32527	3.56408	3.76613	3.48087	3.73576	3.62884	3.67354	3.77111	3.5158	3.53377	3.46078	chr9	107542226	107545706	3481	+	HAVANA	gene	NA	NA
ENSMUSG00000010067.13	protein_coding	Rassf1	5.28538	5.35383	5.31222	4.91336	5.10759	5.26682	5.46284	5.3286	5.20383	4.6303	5.47958	5.54034	5.13965	5.2517	4.78918	5.07507	5.45854	5.50788	5.26014	5.43486	5.4696	5.34742	5.48551	5.07158	4.73917	5.16583	5.02965	5.10821	5.03661	5.26547	5.20205	5.32537	5.47968	5.53604	5.49484	chr9	107551555	107562267	10713	+	HAVANA	gene	NA	NA
ENSMUSG00000010095.13	protein_coding	Slc3a2	6.1939	5.77716	5.88257	6.80707	6.49376	6.56442	6.39695	6.49397	6.71694	6.79422	6.73608	7.12551	6.47797	6.40474	6.65959	6.36368	6.61826	6.92642	7.03748	5.85283	6.00543	6.7721	6.84074	6.55821	6.79902	6.64471	6.76102	6.02168	5.80459	6.27061	6.24548	6.40765	6.82459	6.81542	6.61306	chr19	8706882	8723369	16488	-	HAVANA	gene	NA	NA
ENSMUSG00000010097.13	protein_coding	Nxf1	7.91397	7.93206	7.95866	7.83478	8.07132	7.68115	7.45137	7.99052	8.04667	7.8015	7.70058	7.63283	7.2586	8.05372	8.00827	8.08814	7.79018	7.81907	7.76642	8.35579	8.34102	7.89733	7.97896	7.9557	7.93909	7.94455	7.68927	7.51288	7.5074	8.15549	8.15051	8.20766	7.84703	7.93016	7.83448	chr19	8757073	8772475	15403	+	HAVANA	gene	NA	NA
ENSMUSG00000010110.17	protein_coding	Stx5a	6.15925	6.43671	6.43681	5.30653	5.87974	6.10683	6.45128	6.01863	5.88269	5.5156	5.59971	5.46054	6.13578	5.98383	5.93498	6.06739	5.50738	5.51276	5.51973	6.47717	6.45042	5.57981	5.8491	5.79186	5.62912	5.63456	6.06033	6.36858	6.33023	6.18563	6.30191	6.21172	5.46172	5.54559	5.45468	chr19	8741413	8756069	14657	+	HAVANA	gene	NA	NA
ENSMUSG00000010142.12	protein_coding	Tnfrsf13b	4.8645	5.30293	5.28113	4.27405	4.32828	4.80567	4.84688	4.31641	4.4209	4.28344	4.25058	4.45605	4.43047	4.45898	4.36616	4.33539	4.58778	4.44451	4.34117	4.21853	4.13138	4.20922	3.91109	4.65656	4.38306	4.36504	4.97417	5.08335	5.04547	4.21363	4.14504	4.22143	4.42404	4.66817	4.38613	chr11	61126755	61149372	22618	+	HAVANA	gene	NA	NA
ENSMUSG00000010205.10	protein_coding	Raver1	6.74274	6.01682	6.04639	7.59318	7.44955	7.60468	7.20513	7.39603	7.54145	7.57992	7.59612	7.83442	7.38342	7.31322	7.36547	7.30518	7.76187	7.8618	7.71716	6.77749	6.82065	7.57827	7.67334	7.58481	7.63855	7.557	7.7271	7.18643	6.89676	7.07552	7.19002	7.13281	7.77296	7.7427	7.66118	chr9	21074168	21091988	17821	-	ENSEMBL	gene	NA	NA
ENSMUSG00000010277.7	protein_coding	2610507B11Rik	8.05194	7.75857	7.73196	8.45266	8.30195	8.42088	8.11175	8.35555	8.44439	8.47492	8.55293	8.71036	8.44704	8.23273	8.2914	8.25372	8.60374	8.67941	8.65899	7.97237	7.98559	8.47949	8.39802	8.35771	8.3893	8.40379	8.43377	7.92611	7.94456	8.15191	8.12119	8.13992	8.59867	8.62106	8.55958	chr11	78261752	78290623	28872	+	HAVANA	gene	NA	NA
ENSMUSG00000010290.7	protein_coding	AI597479	4.66642	4.84899	4.68455	4.97556	4.74496	4.61624	4.54558	4.54744	4.48284	4.68695	4.68984	4.57877	4.48553	4.50847	4.17854	4.43034	4.65738	4.52286	4.67096	4.11216	4.44531	4.42254	4.27081	4.79997	4.73561	4.82185	4.51683	4.38926	4.37763	4.7281	4.60324	4.54364	4.57882	4.61372	4.83273	chr1	43098710	43115947	17238	+	HAVANA	gene	NA	NA
ENSMUSG00000010358.13	protein_coding	Ifi35	5.53961	5.70115	5.60311	5.45032	5.84947	5.08249	5.26207	5.56135	5.60674	5.52661	5.58466	5.4833	5.47564	5.4014	5.32914	5.27665	5.70503	5.72661	5.66878	4.71839	4.82465	5.4158	5.39209	5.63796	5.65559	5.55725	5.33744	5.21249	5.18632	5.44411	5.08994	5.41488	5.65935	5.62861	5.50161	chr11	101448407	101458698	10292	+	HAVANA	gene	NA	NA
ENSMUSG00000010376.14	protein_coding	Nedd8	5.20258	5.21283	5.26052	5.40803	5.24658	5.49467	5.13935	5.01572	5.09055	5.44485	5.28123	5.56902	5.27797	5.08822	5.0883	5.07036	5.36101	5.58872	5.63121	4.12649	4.28785	5.32296	5.34355	5.30534	5.13975	5.32891	5.51252	4.99711	4.94946	4.62342	4.87531	4.6937	5.26623	5.43374	5.38931	chr14	55662265	55671906	9642	-	ENSEMBL	gene	NA	NA
ENSMUSG00000010392.8	protein_coding	Gosr1	6.18833	6.2015	6.14714	5.80594	5.88875	6.35293	6.50859	6.31204	6.18053	5.73025	6.53157	6.32173	6.46432	6.07753	5.94358	6.20444	6.24404	6.2297	6.23941	6.2474	6.33702	6.15368	6.20201	5.87412	5.79628	5.97024	6.27562	6.65393	6.75435	6.17332	6.14622	6.12708	6.22597	6.21712	6.28533	chr11	76726602	76763579	36978	-	HAVANA	gene	NA	NA
ENSMUSG00000010406.11	protein_coding	Mrpl52	3.9966	4.21169	4.09987	4.37778	4.05995	3.46191	3.53191	3.79276	4.01425	4.13486	4.02126	3.91369	3.82032	3.85	4.06095	4.07434	3.84812	4.08979	4.07784	3.00568	3.34073	3.99827	4.03883	4.2829	4.08444	4.14886	3.69926	3.44495	3.41634	3.26788	3.5684	3.77111	3.76188	4.12269	3.7157	chr14	54426909	54429756	2848	+	HAVANA	gene	NA	NA
ENSMUSG00000010453.12	protein_coding	Kansl3	6.11424	5.92894	5.92832	6.07569	6.15998	6.04144	6.12887	6.39156	6.32335	6.21669	6.2994	6.14917	6.28897	6.40038	6.382	6.44172	6.26306	6.37009	6.1442	6.74893	6.63305	6.24744	6.33898	6.22872	6.29039	6.20144	6.1596	6.2651	6.22754	6.56116	6.47006	6.42269	6.25496	6.23165	6.23659	chr1	36335730	36369181	33452	-	HAVANA	gene	NA	NA
ENSMUSG00000010517.7	protein_coding	Faf1	5.78445	5.6329	5.63793	6.14936	5.82217	6.28133	6.05836	5.78355	5.85251	6.10894	6.104	6.31828	5.87263	5.60898	5.63526	5.74915	6.18544	6.19871	6.24665	5.28897	5.37403	6.14638	5.97845	5.84575	6.08607	5.97632	6.25996	5.88316	5.86314	5.48503	5.60381	5.42238	6.22205	6.1876	6.2733	chr4	109676588	109963960	287373	+	HAVANA	gene	NA	NA
ENSMUSG00000010554.14	protein_coding	Mettl16	5.81117	5.64067	5.55412	6.62247	6.39454	5.51109	4.96241	5.98512	6.10967	6.56136	6.06386	6.25184	5.55806	6.07096	6.20195	6.12245	6.24665	6.35812	6.37834	5.74244	5.67851	6.26912	6.13548	6.34321	6.58805	6.41041	5.58971	4.91635	4.82272	5.95036	5.92186	5.8357	6.34401	6.42588	6.42547	chr11	74770830	74828525	57696	+	HAVANA	gene	NA	NA
ENSMUSG00000010608.15	protein_coding	Rbm25	8.40489	8.15155	8.16161	8.72349	8.9347	8.40182	8.19267	8.61131	8.52561	8.88539	8.37481	8.40638	8.45016	8.77155	8.84134	8.81945	8.62384	8.61111	8.66521	8.98642	9.13279	8.85787	8.78727	8.71416	8.8042	8.76167	8.35885	8.30758	8.27249	8.86666	8.75259	8.8263	8.52652	8.41311	8.69472	chr12	83631236	83683123	51888	+	HAVANA	gene	NA	NA
ENSMUSG00000010609.15	protein_coding	Psen2	5.03175	5.42832	5.47769	4.64016	4.68421	4.82769	4.79362	4.50315	4.27451	4.22207	4.38233	4.66604	4.112	4.82467	4.74637	4.66188	4.30042	4.29626	4.6449	4.95618	4.96968	4.47479	4.72193	4.64648	4.87664	4.70714	4.84535	4.62418	4.76372	4.77074	4.92406	4.67499	4.41036	4.37924	4.2098	chr1	180227004	180263438	36435	-	HAVANA	gene	NA	NA
ENSMUSG00000010663.4	protein_coding	Fads1	4.64791	3.99492	3.87723	5.10059	4.52588	6.74768	6.30859	4.73044	4.92343	5.08526	5.55594	6.07342	6.1595	4.74156	4.84377	4.79866	5.96244	6.20393	6.42055	4.13596	4.20983	5.54247	5.3809	4.93455	4.95178	4.9302	6.72785	6.1208	6.03619	4.36354	4.24224	4.53675	5.77061	5.74114	5.70549	chr19	10182888	10196870	13983	+	ENSEMBL	gene	NA	NA
ENSMUSG00000010751.15	protein_coding	Tnfrsf22	4.17905	3.38994	3.47781	4.65968	5.10694	4.94181	4.92143	5.22427	4.8108	4.55409	4.81514	4.73459	4.86374	5.08376	4.76332	5.179	4.46092	4.92005	4.88432	5.53485	5.58005	4.66658	5.00846	4.64728	4.54706	4.94847	4.98479	4.92661	4.84564	5.41376	5.35478	5.23629	4.69351	4.65572	4.60738	chr7	143634806	143649661	14856	-	HAVANA	gene	NA	NA
ENSMUSG00000010755.17	protein_coding	Cars	5.17189	4.79805	4.5468	6.00941	5.68678	6.12206	5.63039	5.67532	5.76715	5.88634	5.77778	6.28544	5.68218	5.30165	5.34841	5.34838	5.71749	6.0371	6.26815	4.89613	4.9629	5.83094	5.79691	5.82689	5.90206	5.86169	6.42425	5.19928	4.81063	5.19965	5.16398	5.23497	6.02518	5.96861	5.83507	chr7	143557230	143600090	42861	-	HAVANA	gene	NA	NA
ENSMUSG00000010914.10	protein_coding	Pdhx	3.93825	3.88015	3.89337	4.2024	3.88204	4.19965	3.79302	3.8272	4.02262	4.16452	4.07706	4.39186	3.97176	3.66452	3.82998	3.75537	4.17094	4.27661	4.2548	3.24333	3.17854	4.04928	4.04242	4.14998	4.03625	4.10515	4.27915	3.96371	3.73063	3.72834	3.71107	4.1328	4.25064	4.20603	4.37973	chr2	103021075	103073513	52439	-	HAVANA	gene	NA	NA
ENSMUSG00000010936.10	protein_coding	Vac14	5.34742	5.17633	5.15962	5.84085	5.75483	5.1977	4.97681	5.53303	5.68873	5.73465	5.45202	5.81992	5.13342	5.58918	5.62594	5.50636	5.74604	5.77731	5.77128	5.26111	5.14763	5.59169	5.71265	5.72872	5.92336	5.72879	5.47303	4.91417	4.83471	5.44756	5.39292	5.481	5.72713	5.85349	5.49372	chr8	110618638	110720396	101759	+	ENSEMBL	gene	NA	NA
ENSMUSG00000011008.13	protein_coding	Mcoln2	4.0517	4.33187	4.28253	3.36918	2.76963	5.26056	4.91331	2.77126	3.11667	2.32156	4.25823	4.39448	3.97176	2.8284	3.41344	3.50502	4.48845	4.61515	4.6688	2.85323	3.61316	4.55419	4.50485	2.82328	3.33255	3.1348	5.15792	4.94449	5.09816	2.97558	2.53847	2.60754	4.28102	4.18378	4.2098	chr3	146149833	146195513	45681	+	HAVANA	gene	NA	NA
ENSMUSG00000011096.17	protein_coding	Akt1s1	3.90474	3.86332	3.88263	4.02204	4.0679	3.61157	3.74892	4.20149	4.0556	3.96172	3.9253	3.82312	3.94344	4.11149	4.09222	3.81289	4.00833	4.0002	3.73502	4.11695	4.21744	3.82614	3.83031	3.87556	4.0407	3.94907	3.58749	3.7741	3.75608	4.10674	4.03095	4.22143	3.69574	4.12269	3.69524	chr7	44848991	44855421	6431	+	HAVANA	gene	NA	NA
ENSMUSG00000011114.17	protein_coding	Tbrg1	6.10992	6.17155	6.15497	6.13833	6.06786	6.03009	6.21242	6.1046	6.1018	6.1953	5.97697	5.91343	6.06733	5.92551	6.12181	6.09663	5.96772	6.0396	6.09292	5.75786	5.93789	5.95233	6.02638	6.03934	6.15539	6.20057	6.06508	6.33135	6.32599	5.91066	5.99214	6.07807	6.05626	5.99867	5.93007	chr9	37649182	37657312	8131	-	HAVANA	gene	NA	NA
ENSMUSG00000011158.7	protein_coding	Brf1	5.62732	5.91156	5.95665	5.16243	5.2136	4.98186	5.10338	5.39965	5.35797	5.37719	5.37601	5.18055	5.26173	5.4736	5.50294	5.34781	5.31506	5.2481	5.05821	5.82933	5.84423	5.33281	5.54222	5.30963	5.26256	5.26507	5.17452	5.25995	5.21006	5.46116	5.53076	5.50171	5.10522	5.23484	5.03302	chr12	112959862	113000621	40760	-	ENSEMBL	gene	NA	NA
ENSMUSG00000011179.7	protein_coding	Odc1	6.89035	6.32748	6.43138	8.24793	7.74182	7.23933	6.95715	7.41133	7.84959	8.06809	7.87025	8.45807	7.45725	6.81961	7.25072	6.95789	7.93613	8.31918	8.29165	5.07194	5.45131	7.87875	7.829	7.79559	7.99215	8.02179	7.38726	6.55794	6.26413	6.47842	6.41147	6.48742	8.16514	8.07594	8.09612	chr12	17544873	17551502	6630	+	ENSEMBL	gene	NA	NA
ENSMUSG00000011254.16	protein_coding	Thg1l	3.69238	3.41635	3.48489	4.61915	4.0679	4.14106	3.46535	4.04445	4.29537	4.33362	3.87978	4.50786	3.83966	3.7493	4.00041	3.89508	4.24932	4.53944	4.30558	2.47453	2.69122	3.99176	4.06378	4.37436	4.21218	4.20515	4.11295	3.51013	3.37751	3.48829	3.34789	3.31973	4.11384	4.5102	4.16586	chr11	45946843	45955494	8652	-	HAVANA	gene	NA	NA
ENSMUSG00000011256.16	protein_coding	Adam19	6.52565	6.343	6.3605	6.21875	6.46545	7.24481	6.87013	6.2894	6.56668	5.98143	7.50635	7.9569	6.95783	6.26487	6.10944	5.71739	7.37828	7.51592	7.3082	6.19285	5.63795	6.82732	6.9849	6.39919	6.34356	6.08532	7.46521	6.74351	6.63392	6.26896	6.49178	6.18773	7.34228	7.16166	7.26733	chr11	46055992	46147343	91352	+	HAVANA	gene	NA	NA
ENSMUSG00000011257.19	protein_coding	Pabpc4	6.68237	6.20771	6.3101	7.89316	7.38175	7.06532	6.71347	7.16342	7.49263	7.75474	7.0226	7.46741	6.76233	6.95841	7.1733	6.98364	7.20521	7.42964	7.45443	5.86319	6.02052	7.20052	7.17193	7.56557	7.64467	7.63734	7.2423	6.55522	6.40416	6.68134	6.69167	6.82139	7.3778	7.34585	7.2418	chr4	123262351	123298925	36575	+	HAVANA	gene	NA	NA
ENSMUSG00000011306.6	protein_coding	Sugp1	4.75362	4.42161	4.34449	5.07304	5.17846	5.28941	5.25814	5.06626	5.183	5.03083	5.02013	5.17947	5.31714	5.0284	4.92201	5.12437	5.15802	5.16738	5.21042	4.86514	4.95836	5.12764	5.14908	5.19374	5.13143	5.09009	5.36316	5.17938	5.3378	5.09169	4.95046	5.09655	5.04062	5.18757	5.00473	chr8	70042813	70071953	29141	+	ENSEMBL	gene	NA	NA
ENSMUSG00000011427.16	protein_coding	Zfp790	4.63835	4.57561	4.69072	4.49546	4.68937	4.29757	4.6983	4.75451	4.6306	4.2954	4.58231	4.41012	4.44569	4.86829	4.45906	4.8034	4.52328	4.57205	4.43032	5.09863	5.04864	4.64404	4.67412	4.77935	4.397	4.67262	4.57394	4.81448	4.77123	4.8257	4.71829	4.91712	4.56654	4.66281	4.47284	chr7	29816114	29831005	14892	+	HAVANA	gene	NA	NA
ENSMUSG00000011658.15	protein_coding	Fuz	4.55544	5.04782	4.84271	4.25696	4.36732	3.67158	3.80232	4.41726	4.18769	4.11424	3.86113	3.40208	3.71428	4.65294	4.55871	4.50649	3.89396	3.90219	3.75622	4.76278	4.78466	3.77698	4.09261	4.43676	4.61873	4.33753	3.92423	4.16132	4.11159	4.65775	4.30101	4.64633	3.70586	4.03764	3.87874	chr7	44896079	44902631	6553	+	HAVANA	gene	NA	NA
ENSMUSG00000011752.6	protein_coding	Pgam1	6.72466	5.90025	5.90291	8.13816	7.56389	8.64146	7.2889	7.33545	7.70293	7.89065	8.15372	8.62091	7.58993	6.99495	7.05925	7.14805	8.18685	8.24927	8.38267	5.54871	5.91313	7.90032	7.76534	7.71422	7.69217	7.87693	8.33845	6.78423	6.74405	6.47628	6.43898	6.61268	8.32191	8.22645	8.22688	chr19	41911871	41918664	6794	+	ENSEMBL	gene	NA	NA
ENSMUSG00000011837.4	protein_coding	Snapc2	3.3814	3.44247	3.41952	3.29692	3.14511	3.65162	3.21287	3.16752	3.28372	3.22297	3.53852	3.50161	3.30646	3.20176	3.28398	3.37102	3.57131	3.36551	3.38759	2.92055	2.90437	3.26039	3.49509	3.46356	3.50984	3.1348	3.86967	3.50432	3.07182	3.21397	3.31576	3.20269	3.56602	3.42413	3.25246	chr8	4253080	4256220	3141	+	HAVANA	gene	NA	NA
ENSMUSG00000011877.13	protein_coding	Git1	5.30771	4.91695	5.00606	5.79568	5.5516	5.59309	5.21422	5.7065	5.84781	5.78432	5.87792	5.94688	5.72546	5.612	5.69505	5.64214	5.84688	5.86451	5.90993	5.42075	5.43572	5.83731	5.83364	5.71792	5.67133	5.67125	5.69765	5.07945	5.20181	5.424	5.46791	5.45564	5.84369	5.92679	5.62664	chr11	77493562	77507786	14225	+	HAVANA	gene	NA	NA
ENSMUSG00000011884.13	protein_coding	Gltp	6.09014	5.57046	5.49806	6.72634	6.48191	6.79818	6.78728	6.63025	6.71005	6.59624	6.66022	6.7379	6.71113	6.58932	6.63125	6.53725	6.73677	6.75494	6.66377	6.50576	6.40028	6.60902	6.61156	6.66887	6.59487	6.66806	7.0387	6.80088	6.69243	6.41201	6.5395	6.54964	6.65947	6.66019	6.50845	chr5	114669398	114690984	21587	-	HAVANA	gene	NA	NA
ENSMUSG00000011958.17	protein_coding	Bnip2	6.26604	6.20066	6.20515	6.31439	6.11646	6.58219	6.32362	6.14471	6.08743	6.22911	6.56948	6.76218	6.41126	6.18881	6.1198	6.22116	6.49622	6.47953	6.618	6.0354	6.09877	6.58668	6.44617	6.12776	6.03455	6.26479	6.5634	6.40992	6.4461	6.12645	6.15503	6.26855	6.50686	6.35954	6.43901	chr9	69989466	70008317	18852	+	HAVANA	gene	NA	NA
ENSMUSG00000011960.12	protein_coding	Ccnt1	6.897	6.62174	6.69675	7.19807	7.32465	6.99804	6.93959	7.1107	7.08986	6.93836	7.03469	7.06478	7.02205	7.23995	6.88289	7.26191	7.16792	7.13398	7.14351	7.11893	7.18005	7.14329	7.05269	7.29471	7.01285	7.25509	7.07985	7.08092	6.98438	7.33073	7.30286	7.36744	7.17523	7.14865	7.23355	chr15	98538689	98570923	32235	-	HAVANA	gene	NA	NA
ENSMUSG00000012076.7	protein_coding	Brms1l	4.25637	4.08294	4.24738	4.42213	4.16743	4.44161	4.36749	4.54284	4.45427	4.24076	4.59444	4.48834	4.4381	4.20251	4.21096	4.34517	4.46475	4.41143	4.45552	4.17324	4.34806	4.29097	4.34247	4.20256	4.32953	4.35574	4.33371	4.4018	4.39069	4.18589	4.30903	4.38385	4.33994	4.29177	4.1953	chr12	55836366	55869735	33370	+	ENSEMBL	gene	NA	NA
ENSMUSG00000012114.16	protein_coding	Med15	5.42778	5.21473	5.17731	5.6143	5.57966	5.81325	5.71876	5.37386	5.47984	4.91734	5.28373	5.59776	5.05781	5.84688	5.85745	5.65531	5.8003	5.82254	5.77929	5.76093	5.68539	5.75903	5.90243	5.55896	5.70814	5.54061	5.83414	5.72118	5.80215	5.73518	5.85637	5.80161	5.81801	5.7563	5.6666	chr16	17651221	17722930	71710	-	ENSEMBL	gene	NA	NA
ENSMUSG00000012117.13	protein_coding	Dhdds	5.04363	4.70938	4.58041	5.52674	5.29817	5.76042	5.59968	5.28579	5.37378	5.54095	5.58662	5.66123	5.6287	5.30912	5.35487	5.3189	5.64949	5.60344	5.70557	4.97742	4.98761	5.34991	5.37094	5.4208	5.45842	5.48485	5.87041	5.4629	5.44653	5.161	5.41204	4.98452	5.46129	5.65479	5.44858	chr4	133969028	134000918	31891	-	HAVANA	gene	NA	NA
ENSMUSG00000012126.16	protein_coding	Ubxn11	4.24506	4.65428	4.41531	4.02763	3.92556	3.96936	3.84484	4.02586	3.90675	3.64629	3.67536	3.58049	3.57567	4.13647	4.24061	4.25819	3.78857	3.76777	3.88799	4.33644	3.98919	3.62685	4.00614	4.18249	4.06453	4.08983	3.7759	3.92474	3.94119	4.30117	4.18417	4.32387	3.79426	4.00332	3.76876	chr4	134102570	134127593	25024	+	HAVANA	gene	NA	NA
ENSMUSG00000012296.15	protein_coding	Tjap1	4.03685	3.95238	3.85818	4.33202	4.43046	4.27851	4.21377	4.17499	4.30225	4.2653	4.18259	4.41012	4.21038	4.14108	4.16757	4.08216	4.18551	4.26526	4.26624	3.85546	3.81236	4.26153	4.31898	4.25993	4.40393	4.26265	4.31149	4.23657	3.93162	3.9424	3.81813	3.79441	4.12225	4.19123	3.95827	chr17	46257851	46283026	25176	-	ENSEMBL	gene	NA	NA
ENSMUSG00000012405.15	protein_coding	Rpl15	9.43341	9.42775	9.46322	9.57628	9.63457	9.49034	9.53909	9.6104	9.64364	9.66856	9.51035	9.62916	9.43447	9.4197	9.52988	9.48385	9.31049	9.44245	9.39809	8.61596	8.84356	9.27695	9.15935	9.47142	9.41106	9.47708	9.55398	9.41602	9.32008	9.35187	9.384	9.32084	9.59462	9.53457	9.42972	chr14	18267823	18271391	3569	-	HAVANA	gene	NA	NA
ENSMUSG00000012422.14	protein_coding	Tmem167	6.32798	6.25795	6.33266	6.53573	6.42734	6.27574	6.23457	6.45962	6.32026	6.69213	6.4458	6.54713	6.21647	6.35961	6.49308	6.36528	6.48471	6.37802	6.47552	5.96204	6.09186	6.43833	6.08284	6.40585	6.514	6.41936	6.23825	6.17296	6.21199	6.34774	6.25821	6.34788	6.42618	6.33792	6.57437	chr13	90089123	90143907	54785	+	HAVANA	gene	NA	NA
ENSMUSG00000012429.8	protein_coding	Mplkip	4.82057	5.00874	4.91768	4.51834	4.78886	4.50577	4.80427	5.02564	4.87806	4.80039	4.78279	4.77656	4.83537	4.785	4.06867	4.88163	4.48542	4.56746	4.5542	4.8159	4.96288	4.51363	4.51005	4.61055	4.22385	4.61116	4.45152	4.62662	4.67311	4.79375	4.96052	5.06308	4.59663	4.52208	4.70027	chr13	17695413	17699105	3693	+	ENSEMBL	gene	NA	NA
ENSMUSG00000012443.3	protein_coding	Kif11	6.42233	5.50315	5.77852	7.37465	6.01745	8.9712	8.82935	7.17928	7.51488	7.36056	8.40341	8.61979	8.60953	5.84817	5.84947	6.41643	8.65044	8.46812	8.58854	3.43838	4.15932	8.13558	7.94507	6.6757	6.37384	7.05783	8.94424	8.61624	8.53579	4.33856	4.0506	4.31302	8.41134	8.3777	8.4482	chr19	37376403	37421859	45457	+	ENSEMBL	gene	NA	NA
ENSMUSG00000012483.4	protein_coding	Rpa3	4.02779	3.73696	3.85771	4.59567	4.04392	4.79898	4.49975	4.20149	4.42932	4.73387	4.64001	4.84738	4.69968	3.8854	3.82068	4.03862	4.63897	4.67854	4.82006	3.11509	2.77617	4.41527	4.28297	4.206	4.23953	4.57453	4.8387	4.25397	4.03919	3.53301	3.62193	3.42798	4.63284	4.38575	4.54882	chr6	8255936	8259173	3238	-	HAVANA	gene	NA	NA
ENSMUSG00000012535.14	protein_coding	Tnpo3	7.15249	7.1393	7.10208	7.43329	7.35897	7.08672	6.83733	7.09553	7.17817	7.36241	7.14699	7.38468	6.9706	7.10808	7.20549	7.0839	7.34565	7.3842	7.3451	6.96466	6.96551	7.28583	7.23189	7.29481	7.39481	7.3465	7.14611	6.83056	6.7191	7.07652	7.12341	7.08819	7.31202	7.3692	7.4208	chr6	29540827	29609887	69061	-	HAVANA	gene	NA	NA
ENSMUSG00000012609.18	protein_coding	Ttll5	4.5658	4.13367	4.11371	4.83682	4.74496	5.6211	5.19792	4.92499	4.82006	5.05918	5.10735	5.14717	5.4248	4.78505	4.67586	4.75775	5.21772	5.31917	5.16836	5.00869	4.64487	5.18008	5.11709	4.67653	4.9612	4.80829	5.41617	5.10653	5.03511	4.86995	4.79019	4.53675	5.09294	5.13441	5.06579	chr12	85824659	86061893	237235	+	HAVANA	gene	NA	NA
ENSMUSG00000012640.16	protein_coding	Zfp715	5.30831	5.5399	5.62832	4.95725	5.21471	4.74216	4.65116	5.09009	5.09187	5.00374	5.09032	5.06557	5.3199	5.22082	5.09217	5.24421	4.80388	4.79561	4.71754	5.24807	5.41269	4.95448	4.90861	5.03849	4.86916	5.06939	4.61339	4.84236	4.98649	5.35407	5.39676	5.4774	4.96309	4.94892	4.85596	chr7	43296197	43313294	17098	-	HAVANA	gene	NA	NA
ENSMUSG00000012848.15	protein_coding	Rps5	9.38865	9.6824	9.72497	9.08012	9.04438	9.14031	9.21287	9.39902	9.37939	9.14958	9.34339	9.23985	9.17395	9.07594	9.15306	9.11578	8.99044	9.10203	9.03505	8.64333	8.90389	8.88974	8.97635	8.95223	8.90734	9.02383	9.20197	9.13035	9.0361	8.92138	8.98585	8.99728	9.0766	9.12281	8.9518	chr7	12922290	12926686	4397	+	HAVANA	gene	NA	NA
ENSMUSG00000012889.8	protein_coding	Podnl1	4.02086	4.64053	4.64697	2.88992	2.68946	3.72386	4.20564	2.87002	2.84209	2.77046	4.0914	4.21615	4.51711	2.72054	2.88025	2.98551	3.67821	3.57766	3.72261	3.12464	3.09005	3.59677	3.63008	3.28	3.43071	3.59601	3.86532	4.24355	3.95378	2.82186	2.94774	2.58099	3.39596	3.44922	3.34732	chr8	84125989	84132527	6539	+	HAVANA	gene	NA	NA
ENSMUSG00000013033.16	protein_coding	Adgrl1	6.27111	5.90532	6.04603	6.61679	6.61715	6.12924	6.43796	6.94937	6.91018	7.00338	6.65341	6.08252	6.49599	6.95903	6.89797	6.74652	6.70852	6.38954	6.24669	6.82747	6.62511	6.22531	6.2548	6.75956	6.80394	6.44611	6.3599	6.08177	6.01888	6.79531	6.75844	6.85422	6.45904	6.57552	6.43975	chr8	83900105	83941954	41850	+	HAVANA	gene	NA	NA
ENSMUSG00000013160.7	protein_coding	Atp6v0d1	4.93437	5.03325	4.97859	4.50923	4.57132	5.30363	5.54594	4.78208	4.8072	4.48234	4.91928	5.08193	5.03113	4.66507	4.69126	4.72066	4.81095	4.97701	4.94277	4.82471	4.86448	4.91033	4.80883	4.55237	4.3476	4.59574	5.28388	5.4614	5.57791	4.63885	4.66191	4.70604	4.79429	4.93122	4.80912	chr8	105524465	105566047	41583	-	HAVANA	gene	NA	NA
ENSMUSG00000013236.16	protein_coding	Ptprs	5.39044	4.97179	5.23015	6.36414	6.53448	5.55531	5.48003	5.81821	6.38574	6.7218	5.66634	5.59206	5.90696	5.79332	5.80415	5.63286	5.75339	5.54597	5.46493	3.83234	4.12329	5.07169	4.66716	6.63865	6.41126	6.32248	6.01489	5.56263	5.37277	5.36028	5.29333	5.42984	5.87888	6.00925	5.74833	chr17	56412431	56476483	64053	-	HAVANA	gene	NA	NA
ENSMUSG00000013275.9	protein_coding	Slc41a1	4.91464	5.14684	5.2326	4.83318	4.96947	3.85402	4.36018	4.98045	4.83912	4.89392	4.54322	4.08912	4.29128	5.03742	4.82061	4.9916	4.17094	4.23358	4.12572	5.48517	5.22333	4.53194	4.64843	5.02297	4.94705	4.69245	3.84337	4.17212	4.15467	5.18221	5.28506	5.08242	4.44432	4.44309	4.27331	chr1	131827493	131848865	21373	+	HAVANA	gene	NA	NA
ENSMUSG00000013465.18	protein_coding	Nelfb	6.03312	6.1593	6.17	5.82717	6.01128	6.06295	6.01014	5.8418	5.83599	5.68093	6.07832	5.96023	6.0274	5.9182	5.84832	5.82799	5.88867	5.83986	5.90536	5.82821	5.84015	5.84545	5.76357	5.90935	5.98583	5.8791	6.05937	5.91085	5.79848	5.8523	5.88128	5.95939	5.95624	5.90655	5.91023	chr2	25199712	25211489	11778	-	HAVANA	gene	NA	NA
ENSMUSG00000013495.15	protein_coding	Tmem175	4.44142	4.57106	4.52628	4.34498	3.95663	4.16609	4.39056	4.12748	4.34361	4.06658	4.10194	4.22962	3.98531	4.48159	4.52767	4.36982	4.31465	4.41364	4.35109	4.67102	4.62534	4.46385	4.32554	4.48001	4.4202	4.22676	4.28844	4.31138	4.42499	4.42094	4.42447	4.56852	4.35787	4.2341	4.27861	chr5	108629770	108648782	19013	+	HAVANA	gene	NA	NA
ENSMUSG00000013539.13	protein_coding	Tango2	4.14473	4.02549	4.07178	3.99293	4.38664	4.28171	4.03254	4.17499	4.17546	4.01697	4.02723	3.98156	4.0369	4.33278	4.28389	4.3023	4.02058	4.15274	4.045	4.65391	4.58726	4.24248	4.33371	4.36823	4.4845	4.12352	4.23262	4.24355	4.28277	4.51613	4.41138	4.33702	3.95329	4.46786	4.22416	chr16	18300825	18348103	47279	-	HAVANA	gene	NA	NA
ENSMUSG00000013593.12	protein_coding	Ndufs2	6.34863	6.38444	6.32527	6.36287	6.15812	6.67484	6.59519	6.30119	6.4569	6.42301	6.52472	6.68209	6.48658	6.22988	6.25215	6.2407	6.42916	6.47604	6.54962	5.66441	5.80899	6.39339	6.33313	6.25717	6.27914	6.31611	6.79858	6.60527	6.58221	5.94416	5.99468	6.12708	6.40391	6.34295	6.2629	chr1	171234853	171251388	16536	-	HAVANA	gene	NA	NA
ENSMUSG00000013622.15	protein_coding	Atraid	4.13305	4.51686	4.43848	3.45008	3.47899	4.18607	4.16318	3.9039	3.8759	3.93704	4.21159	3.97373	4.47181	3.69334	3.48594	3.72398	3.71383	3.63169	3.70456	3.65922	3.92278	3.75433	3.85669	3.75277	3.56029	3.48574	4.072	4.14596	4.14268	3.33256	3.5547	3.3933	3.54113	3.57994	3.86973	chr5	31048312	31054623	6312	+	HAVANA	gene	NA	NA
ENSMUSG00000013629.16	protein_coding	Cad	6.90686	6.19239	6.28197	8.40803	7.91376	7.2628	6.39874	7.68879	8.01593	8.3177	7.85347	8.24526	7.23505	7.54106	7.61854	7.52832	8.12102	8.20758	8.25379	6.20302	6.52135	7.91269	7.83188	8.12099	8.31802	8.12432	7.53621	5.72118	5.42765	7.15819	7.1315	7.17798	8.27314	8.23664	8.14478	chr5	31054780	31078479	23700	+	HAVANA	gene	NA	NA
ENSMUSG00000013646.17	protein_coding	Sh3bp5l	4.45476	4.64053	4.56034	4.00594	4.3993	4.26243	4.38919	4.17202	4.1978	3.84446	4.41916	4.38396	4.19544	4.37252	4.10378	4.32225	4.43152	4.12475	4.22872	4.61719	4.49628	4.28566	4.39116	4.09541	4.33678	4.07526	4.37408	4.33796	4.4449	4.58146	4.44889	4.74244	4.13062	4.45552	4.22416	chr11	58330724	58347728	17005	+	HAVANA	gene	NA	NA
ENSMUSG00000013662.5	protein_coding	Atad1	6.27361	6.24018	6.24772	6.44099	6.28287	6.21688	5.98423	6.27994	6.40026	6.59684	6.53367	6.59809	6.24395	6.25909	6.22418	6.20712	6.5481	6.58619	6.62209	5.79421	5.90525	6.4975	6.20842	6.34087	6.34266	6.4014	6.28949	6.02472	6.05579	6.06899	6.0856	6.09694	6.50874	6.47558	6.58414	chr19	32672563	32712298	39736	-	ENSEMBL	gene	NA	NA
ENSMUSG00000013663.7	protein_coding	Pten	7.78388	7.81959	7.90127	7.26726	7.44146	8.19804	8.20227	7.45683	7.41478	7.39992	7.80578	7.84058	7.87566	7.49704	7.518	7.58957	7.88816	7.81629	7.89765	7.51432	7.74739	7.95554	7.74124	7.32744	7.39905	7.33387	8.14371	8.1861	8.26239	7.57269	7.48296	7.53945	7.74026	7.72951	7.84959	chr19	32757497	32826160	68664	+	HAVANA	gene	NA	NA
ENSMUSG00000013698.12	protein_coding	Pea15a	5.39503	5.42095	5.41199	4.93191	5.10311	5.40963	5.92602	5.11509	5.09187	4.99826	5.36148	5.33232	5.10333	5.62253	5.51635	5.60192	4.99386	5.23148	5.25417	6.23313	6.14873	5.27689	5.42696	4.96124	5.06747	5.02707	5.21374	5.68315	6.04448	5.62845	5.7341	5.5579	5.08435	5.15362	5.12053	chr1	172196728	172206804	10077	-	HAVANA	gene	NA	NA
ENSMUSG00000013701.12	protein_coding	Timm23	6.00734	5.69618	5.74857	6.82215	6.43806	6.27008	5.71387	6.18061	6.47934	6.76916	6.51567	6.96302	6.1372	6.01134	6.23568	6.04541	6.71877	6.87421	6.78166	4.99709	5.159	6.60064	6.51711	6.50904	6.65837	6.62803	6.37043	5.69052	5.5747	5.76737	5.79417	5.73846	6.81999	6.78896	6.78351	chr14	32180162	32201898	21737	-	HAVANA	gene	NA	NA
ENSMUSG00000013707.3	protein_coding	Tnfaip8l2	5.35208	6.1224	6.04067	4.21365	4.36745	4.93708	5.36789	4.43034	4.45014	3.76494	4.39856	4.17402	4.62584	5.05751	4.7659	4.66968	4.1636	4.15274	4.04168	5.65949	5.55472	4.22871	4.35408	4.69866	4.22397	4.41661	4.7136	5.15179	5.33443	5.02671	5.338	5.06815	4.20382	4.35288	4.01716	chr3	95139521	95142360	2840	-	HAVANA	gene	NA	NA
ENSMUSG00000013736.16	protein_coding	Trnt1	6.00287	6.0762	6.12932	6.387	6.18313	5.67863	5.52321	5.95261	5.98812	6.39381	5.8775	6.16042	5.79419	5.82692	5.94878	5.97005	5.95004	6.14278	6.02781	5.40968	5.596	5.90666	5.75162	6.08255	6.18169	6.28792	5.6309	5.41265	5.49137	5.82772	5.67303	5.81847	5.9978	5.93783	6.0843	chr6	106769120	106782474	13355	+	HAVANA	gene	NA	NA
ENSMUSG00000013787.15	protein_coding	Ehmt2	6.74878	6.86977	6.90683	6.22015	6.11466	7.32063	7.33129	6.43935	6.44087	6.30368	6.96427	6.83186	7.1108	6.33238	6.25128	6.21159	6.93574	6.80675	6.88164	6.20865	6.23754	6.46382	6.42058	6.34867	6.37737	6.26737	7.36886	7.29061	7.38836	6.17156	6.16437	6.08281	6.72172	6.8334	6.6534	chr17	34898469	34914052	15584	+	HAVANA	gene	NA	NA
ENSMUSG00000013822.6	protein_coding	Elof1	4.32877	4.28932	4.31284	4.77737	4.34146	4.86863	4.48639	4.37191	4.5899	4.60519	4.5201	4.84356	4.57597	3.99595	4.03301	4.0546	4.71878	4.74952	4.61836	3.31179	3.20942	4.55639	4.53575	4.33721	4.4279	4.57453	4.87811	4.32814	4.2509	3.65941	3.59541	3.58321	4.71304	4.66281	4.63203	chr9	22112989	22117148	4160	-	ENSEMBL	gene	NA	NA
ENSMUSG00000013833.15	protein_coding	Med16	4.30266	4.05542	4.24947	4.50006	4.50261	4.45016	4.38919	4.41532	4.62877	4.46391	4.61244	4.80662	4.47815	4.42502	4.57707	4.2161	4.59326	4.8074	4.50946	4.11695	4.01385	4.4177	4.71744	4.6028	4.59146	4.21547	4.56323	4.36384	4.23651	4.06927	4.27602	4.15997	4.5727	4.78118	4.4177	chr10	79894708	79908923	14216	-	HAVANA	gene	NA	NA
ENSMUSG00000013846.9	protein_coding	St3gal1	5.59626	6.03334	6.00769	5.13653	5.07578	4.86437	5.36059	5.1305	5.2827	4.70276	4.86859	4.75243	4.44569	5.7973	5.58941	5.58826	4.77527	4.34829	4.32485	6.65981	6.3544	4.72471	4.67412	5.40742	5.19666	5.05414	4.88672	5.40332	5.47745	5.84123	6.06159	5.75189	4.49705	4.87676	4.59385	chr15	67102875	67113992	11118	-	ENSEMBL	gene	NA	NA
ENSMUSG00000013858.14	protein_coding	Tmem259	6.01068	6.46764	6.47649	5.50926	5.57966	5.34516	5.3892	5.57589	5.58899	5.37186	5.51908	5.58919	5.22894	5.66803	5.59829	5.37513	5.66332	5.60552	5.60103	5.72529	5.62791	5.523	5.64149	5.67575	5.73544	5.49335	5.65418	5.23477	5.20307	5.63555	5.77873	5.69731	5.56976	5.79345	5.37972	chr10	79974948	79984330	9383	-	HAVANA	gene	NA	NA
ENSMUSG00000013878.18	protein_coding	Rnf170	4.82839	5.06391	4.93272	4.73645	4.73096	4.44984	4.61404	4.96997	4.8987	5.08	5.04938	4.74696	5.17116	4.75737	4.79739	4.71384	4.33978	4.18526	4.23686	4.81808	4.91427	4.56807	4.3589	4.67769	4.52323	4.57148	4.32705	4.85571	4.8377	4.77041	4.78498	4.70751	4.23357	4.24574	4.39871	chr8	26119368	26151790	32423	+	HAVANA	gene	NA	NA
ENSMUSG00000013973.12	protein_coding	Dedd	4.59586	4.24273	4.19825	4.76835	4.94002	4.94175	5.02239	5.05602	5.05973	4.86667	5.26398	5.17702	5.44109	4.96224	4.74578	4.9364	4.79574	4.8532	4.92079	5.19678	5.06676	5.03077	4.99315	4.91245	4.69544	4.90321	4.82604	4.83608	5.02892	4.99198	5.15253	5.23417	4.89708	4.76278	4.80004	chr1	171329145	171342331	13187	+	HAVANA	gene	NA	NA
ENSMUSG00000013997.10	protein_coding	Nit1	4.8406	4.98682	5.04881	4.71879	4.7193	4.84007	4.88461	4.83827	4.65768	4.65183	4.62375	4.40391	4.75413	4.74869	4.79527	4.76527	4.43591	4.32445	4.48088	4.80724	4.791	4.38868	4.33297	4.68537	4.43278	4.76636	4.82012	4.87808	4.86537	4.83367	4.75187	4.83068	4.14531	4.71909	4.53691	chr1	171338008	171345646	7639	-	HAVANA	gene	NA	NA
ENSMUSG00000014039.17	protein_coding	Prdm15	5.10152	5.27503	5.17621	5.0418	5.21471	4.41858	4.58373	4.95298	4.97893	5.13771	4.86191	4.61522	4.59202	5.13309	5.19299	5.05455	4.98347	5.00287	4.91397	5.24588	5.21384	4.95783	5.07388	5.16223	5.27615	5.10126	4.5196	4.63751	4.79843	5.30977	5.29333	5.15622	5.01373	4.76128	5.07769	chr16	97791467	97851850	60384	-	HAVANA	gene	NA	NA
ENSMUSG00000014074.17	protein_coding	Rnf168	5.51525	5.41354	5.37894	5.89168	5.54021	5.85887	5.68698	5.72792	5.78856	5.91318	5.69196	5.92437	5.87263	5.47432	5.49749	5.63685	5.85716	5.81769	5.74758	5.03171	5.16938	5.64655	5.63103	5.60266	5.63438	5.74074	5.88875	5.48959	5.38742	5.20312	5.30974	5.28518	5.84114	5.68679	5.82097	chr16	32277459	32301434	23976	+	HAVANA	gene	NA	NA
ENSMUSG00000014077.13	protein_coding	Chp1	6.04239	5.84175	5.91175	6.07027	6.12231	6.58525	6.76807	6.23574	6.13368	6.06855	6.16015	6.22776	6.60435	6.15624	6.23123	6.21336	6.02151	5.87482	6.00176	6.19058	6.28543	5.99279	5.89847	6.11353	6.05122	6.03087	6.50002	6.78839	6.91943	6.24396	6.25821	6.18111	5.92772	5.87217	5.92788	chr2	119547697	119587027	39331	+	HAVANA	gene	NA	NA
ENSMUSG00000014177.10	protein_coding	Tvp23b	3.94104	4.13167	4.13197	3.75937	3.54881	3.95351	3.30711	3.73749	3.43342	3.69891	3.98179	4.06627	3.76474	3.56199	3.46811	3.70055	3.96253	3.92285	4.21107	3.68526	3.72424	4.00797	3.82615	3.65181	3.66772	3.66788	3.80299	3.76927	3.60741	3.4996	3.58197	3.72334	3.89554	3.90418	3.91468	chr11	62879455	62916780	37326	+	HAVANA	gene	NA	NA
ENSMUSG00000014195.15	protein_coding	Dnajc7	7.29004	7.02416	7.10378	7.27002	7.46596	7.33314	7.41699	7.8759	7.75358	7.36619	7.43874	7.36619	7.32076	7.41528	7.34641	7.7276	7.41325	7.49398	7.41039	7.77669	8.05741	7.59222	7.64778	7.39296	7.05002	7.37406	7.40442	7.44911	7.58434	7.61085	7.61304	7.7076	7.55899	7.69059	7.59087	chr11	100582818	100620168	37351	-	HAVANA	gene	NA	NA
ENSMUSG00000014226.10	protein_coding	Cacybp	6.15626	5.73484	5.80495	7.24931	6.98738	6.33844	5.64249	6.43749	6.70443	7.17022	6.72371	7.14355	6.28897	6.26582	6.51344	6.49394	7.05858	7.06705	7.26941	5.14862	5.58153	7.00068	6.64855	6.82068	6.86447	7.1099	6.36539	5.54011	5.46516	6.09346	6.07844	6.08989	7.00722	6.98909	7.20618	chr1	160202367	160212875	10509	-	HAVANA	gene	NA	NA
ENSMUSG00000014232.14	protein_coding	Cluap1	4.36125	4.44519	4.50674	4.37372	4.14777	4.0418	3.88369	4.38077	4.35315	4.53138	4.23437	4.15707	4.31809	4.17143	4.43074	4.43312	4.41603	4.30286	4.23726	4.22577	4.36472	4.15785	4.12805	4.37417	4.36512	4.34143	4.00717	4.36794	4.50098	4.14448	3.8696	4.06439	4.16361	4.19086	4.2098	chr16	3908801	3941147	32347	+	HAVANA	gene	NA	NA
ENSMUSG00000014294.4	protein_coding	Ndufa2	4.73393	4.98185	4.86996	4.49315	4.53737	4.82988	4.6808	4.66213	4.4909	4.55631	4.74166	4.9365	4.53621	4.23816	4.54916	4.24425	4.81798	4.84791	4.84698	4.06335	4.11108	4.59553	4.53575	4.59496	4.58538	4.59047	4.95587	4.46294	4.04745	4.24757	4.1632	4.28861	4.76233	4.74617	4.58275	chr18	36742332	36744557	2226	-	HAVANA	gene	NA	NA
ENSMUSG00000014313.14	protein_coding	Cox6c	6.34115	6.11144	6.23804	6.48609	6.42849	6.86703	6.67186	6.36413	6.49889	6.63813	6.70029	6.80718	6.69873	6.24214	6.51678	6.38769	6.80271	6.77848	6.74875	5.67239	5.64993	6.4829	6.48783	6.45199	6.39009	6.49352	6.92129	6.68514	6.57572	6.18067	6.22815	6.13545	6.74391	6.79146	6.71415	chr15	35925886	35938246	12361	-	HAVANA	gene	NA	NA
ENSMUSG00000014349.7	protein_coding	Ube2z	6.18289	5.87033	5.93678	6.53093	6.53161	6.6491	6.35529	6.41879	6.47784	6.47719	6.52683	6.66263	6.49148	6.40474	6.36289	6.37565	6.59933	6.53157	6.51588	6.17113	6.17537	6.48829	6.39342	6.60584	6.60467	6.55008	6.67041	6.3947	6.3916	6.29679	6.25398	6.29984	6.51355	6.59844	6.47132	chr11	96047432	96065388	17957	-	HAVANA	gene	NA	NA
ENSMUSG00000014353.14	protein_coding	Tmem87b	5.40047	5.73352	5.71649	4.78493	5.01541	4.76288	5.00051	5.20515	5.05157	4.72505	4.94161	4.59939	4.75778	5.35854	5.13034	5.30727	4.84117	4.55584	4.57533	5.94597	6.02509	4.94441	5.03475	4.97542	5.07617	4.9134	4.78443	5.21002	5.39562	5.65145	5.7462	5.61463	4.63284	4.8997	4.96682	chr2	128818118	128854261	36144	+	HAVANA	gene	NA	NA
ENSMUSG00000014355.10	protein_coding	Anapc1	7.80524	7.54904	7.51834	8.13023	7.99937	8.27244	8.13334	8.01936	8.06416	8.1571	8.20694	8.41346	8.08703	7.88847	7.89865	7.88747	8.33036	8.33705	8.35168	7.52454	7.61482	8.15281	8.05759	8.07731	8.09104	8.0434	8.40802	7.93206	7.91267	7.85717	7.82998	7.75894	8.41819	8.26031	8.34154	chr2	128610104	128687391	77288	-	HAVANA	gene	NA	NA
ENSMUSG00000014402.15	protein_coding	Tsg101	4.94439	4.81702	4.8608	5.16966	5.16248	4.85801	4.92183	4.9472	5.06406	5.14587	5.08	5.30741	5.04573	5.04093	5.06608	5.0199	5.03236	5.08822	5.28812	4.83545	4.96885	5.19532	5.15206	4.94104	5.06107	5.05935	4.94546	4.98522	4.78633	5.07934	5.07998	5.10524	5.03091	5.17077	4.96169	chr7	46888949	46919969	31021	-	HAVANA	gene	NA	NA
ENSMUSG00000014418.16	protein_coding	Hps5	5.70435	6.03657	5.99839	5.203	5.36098	5.3576	5.33098	5.33848	5.28618	5.20745	5.52881	5.27368	5.27939	5.47598	5.53212	5.52369	5.35619	5.20944	5.29523	5.70475	5.60929	5.28888	5.26119	5.41784	5.42819	5.45759	5.3846	5.57238	5.62701	5.46208	5.48967	5.50944	5.26623	5.27788	5.20257	chr7	46760466	46796064	35599	-	HAVANA	gene	NA	NA
ENSMUSG00000014426.8	protein_coding	Map3k4	5.58147	5.59044	5.5917	5.5679	5.46997	5.78764	5.69572	5.43097	5.44293	5.53592	5.46639	5.45552	5.51057	5.68269	5.7695	5.68642	5.37697	5.31091	5.5931	5.78972	5.71124	5.34098	5.35659	5.76063	5.73721	5.69969	5.71951	5.57653	5.70618	5.70862	5.73713	5.54077	5.3829	5.39874	5.35058	chr17	12227621	12318660	91040	-	ENSEMBL	gene	NA	NA
ENSMUSG00000014444.16	protein_coding	Piezo1	6.28443	6.08702	6.15906	6.85432	6.54518	6.48947	5.95772	6.1759	6.44871	6.41262	6.5069	6.60673	6.20739	6.38653	6.43	6.29965	6.71058	6.69741	6.64973	6.39316	6.25972	6.50252	6.52466	6.58492	6.80898	6.6566	6.52584	5.79971	5.71297	6.31022	6.34465	6.42067	6.62308	6.77794	6.6414	chr8	122481698	122551329	69632	-	HAVANA	gene	NA	NA
ENSMUSG00000014470.4	protein_coding	Rnf166	5.45652	6.04885	5.99901	4.27136	4.6369	5.42848	5.66342	4.70803	4.67195	4.06319	4.7252	4.57184	4.98845	4.96364	4.94575	4.94947	4.74853	4.62629	4.64051	5.41687	5.38928	4.86834	4.96835	4.51682	4.567	4.43438	5.29686	5.88092	5.94619	5.12128	5.1228	4.87948	4.43759	4.59697	4.40515	chr8	122466147	122476064	9918	-	HAVANA	gene	NA	NA
ENSMUSG00000014496.7	protein_coding	Ankrd28	5.46287	5.00941	5.10408	6.26345	6.18578	5.68281	5.20201	5.87145	5.90322	6.23467	5.83682	6.0403	5.85182	5.87105	5.94893	5.83032	6.11772	6.19797	6.14264	5.34314	5.45518	5.91929	5.79158	6.0802	6.12429	6.06929	5.71709	5.35415	5.19995	5.77761	5.70649	5.74293	6.07589	6.08726	6.18249	chr14	31700015	31830415	130401	-	ENSEMBL	gene	NA	NA
ENSMUSG00000014498.9	protein_coding	Ankrd52	6.50436	5.73755	5.70142	7.46976	7.27298	7.34908	6.96307	7.04253	7.28272	7.33396	7.46415	7.71589	7.17992	7.07303	7.09894	7.00574	7.66875	7.62845	7.67394	6.92154	6.82574	7.61829	7.63993	7.38529	7.46835	7.31404	7.48283	6.87193	6.82801	6.9381	7.02285	6.82812	7.70594	7.66393	7.51769	chr10	128377115	128408704	31590	+	HAVANA	gene	NA	NA
ENSMUSG00000014504.16	protein_coding	Srp19	5.11526	4.92623	4.89823	5.34159	5.1185	5.49604	5.08718	5.24956	5.36832	5.26029	5.52353	5.86791	5.43247	5.13729	5.17302	5.20715	5.59595	5.6258	5.7285	4.91551	4.9987	5.53801	5.36808	5.23134	5.20461	5.28224	5.55095	5.10653	5.15666	5.07288	5.1228	5.14267	5.48759	5.30563	5.48778	chr18	34330847	34336599	5753	+	HAVANA	gene	NA	NA
ENSMUSG00000014550.14	protein_coding	Rbsn	5.25241	5.21093	5.1133	5.37832	5.30491	5.22947	5.06936	5.31979	5.36064	5.4741	5.32313	5.56437	5.04953	5.25795	5.57426	5.24072	5.37855	5.42113	5.36871	5.49991	5.32729	5.36005	5.31562	5.38181	5.50906	5.14148	5.24757	5.19928	5.23838	5.31938	5.45691	5.22643	5.38989	5.5658	5.47283	chr6	92186712	92214925	28214	-	HAVANA	gene	NA	NA
ENSMUSG00000014551.8	protein_coding	Mrps25	5.62015	5.50445	5.58253	5.85595	5.92348	5.61741	5.35486	5.57126	5.65502	5.92314	5.56153	5.66783	5.38239	5.931	5.91602	5.87776	5.73172	5.458	5.57942	5.73965	5.62678	5.69197	5.69856	5.93151	6.06936	5.7895	5.51792	5.39354	5.36179	5.79042	5.77419	5.79483	5.8177	5.691	5.60236	chr6	92169525	92184033	14509	-	HAVANA	gene	NA	NA
ENSMUSG00000014554.13	protein_coding	Dguok	4.65923	5.0203	4.85905	4.24142	4.26054	4.12692	4.48639	4.25589	4.22704	3.9542	4.13909	4.06627	3.56073	4.68242	4.55759	4.83382	4.2734	4.2101	4.2258	5.26327	5.11742	4.37585	4.54337	4.41057	4.17625	4.28241	4.14919	4.35741	4.44177	4.88727	4.66829	4.71827	4.071	4.26375	4.29387	chr6	83480217	83506969	26753	-	HAVANA	gene	NA	NA
ENSMUSG00000014592.19	protein_coding	Camta1	3.50398	2.99889	2.97997	3.9192	4.361	3.42193	3.59554	4.3976	4.08784	4.15798	3.8665	3.38508	3.62903	4.51817	4.54068	4.36454	4.05272	3.62283	3.40321	4.54791	4.63068	3.86581	3.86317	4.31191	4.2003	3.98167	3.57155	3.76927	3.64059	4.49368	4.58314	4.52983	3.77261	3.64655	3.86057	chr4	150917322	151861876	944555	-	HAVANA	gene	NA	NA
ENSMUSG00000014601.13	protein_coding	Strip1	5.30561	5.63147	5.63233	4.7094	5.07183	4.83423	4.8932	4.97192	4.97606	4.88998	4.7471	4.72975	5.01421	5.2733	5.01062	5.09182	4.77527	4.70611	4.70708	5.40321	5.24025	4.89472	5.08611	5.05574	5.12934	5.01334	4.96606	4.93805	5.02049	5.26408	5.21277	5.29339	4.82555	4.75123	4.84207	chr3	107612532	107631694	19163	-	HAVANA	gene	NA	NA
ENSMUSG00000014606.14	protein_coding	Slc25a11	5.62915	5.85119	5.80769	5.56371	5.33233	5.63458	5.37153	5.36383	5.35224	5.20919	5.59726	5.61811	5.24758	5.31163	5.22724	5.41645	5.52611	5.57269	5.63917	5.38745	5.2612	5.52373	5.42676	5.44573	5.3927	5.49961	5.72857	5.25821	5.40129	5.23392	5.41659	5.11979	5.65935	5.55717	5.4278	chr11	70644196	70647479	3284	-	HAVANA	gene	NA	NA
ENSMUSG00000014668.15	protein_coding	Chfr	6.02318	6.10853	6.09073	5.51509	5.90539	6.21843	6.17831	5.90302	5.79134	5.66938	6.15168	6.19726	6.18211	5.86057	5.77548	5.68249	6.04267	5.96069	5.99739	5.96296	5.97006	5.99898	5.94665	5.63101	5.58696	5.74227	6.19348	6.37173	6.50564	5.9201	5.81368	5.81306	5.87881	5.95766	5.97097	chr5	110135842	110171972	36131	+	HAVANA	gene	NA	NA
ENSMUSG00000014748.13	protein_coding	Tex261	5.85575	5.6568	5.7463	5.89168	5.94593	6.31758	6.05384	6.01531	5.97033	5.87083	6.02107	6.1445	6.12995	6.03088	5.84832	5.84533	6.04766	6.05122	6.01707	5.99884	5.96754	5.89422	5.98032	5.93651	5.81328	5.87042	6.31204	6.25908	6.30027	5.88069	5.81676	5.98747	6.06502	6.05697	5.97745	chr6	83768885	83775813	6929	-	HAVANA	gene	NA	NA
ENSMUSG00000014763.7	protein_coding	Fam120b	5.56026	5.84299	5.72917	5.22124	5.46094	4.99855	5.26989	5.47024	5.35293	5.03441	5.27119	4.99817	4.89539	5.50715	5.43939	5.67999	5.12249	5.12719	5.11874	5.93516	5.92632	5.29153	5.39501	5.34486	5.18465	5.43128	4.88886	5.35737	5.51521	5.64128	5.69092	5.53733	4.91061	5.36287	5.32083	chr17	15396246	15433580	37335	+	ENSEMBL	gene	NA	NA
ENSMUSG00000014767.16	protein_coding	Tbp	6.10521	6.18418	6.13513	6.02489	6.2083	5.82067	5.99611	6.12903	6.01144	5.82504	5.9243	6.07903	5.85528	6.20442	5.9173	6.33128	5.98614	6.01253	5.94126	6.04115	6.31106	6.04681	6.02756	6.00188	5.90082	6.08989	5.90667	5.89901	5.96449	6.29586	6.24557	6.23497	6.08057	6.08746	6.22385	chr17	15499888	15528379	28492	+	HAVANA	gene	NA	NA
ENSMUSG00000014769.9	protein_coding	Psmb1	6.6626	6.60468	6.65514	6.63508	6.53448	7.11081	6.85254	6.58232	6.72037	6.74216	6.99662	7.15133	6.89015	6.42636	6.54981	6.46059	6.98187	7.03441	7.04497	5.85856	6.10012	6.77637	6.8834	6.60779	6.58881	6.64216	7.09831	6.90424	6.83955	6.18738	6.23907	6.27935	6.87027	6.89177	6.76806	chr17	15475721	15498276	22556	-	ENSEMBL	gene	NA	NA
ENSMUSG00000014771.12	protein_coding	Pdcd2	4.39901	4.44242	4.47769	4.25979	4.33205	4.36315	4.65104	4.24579	4.40423	4.29567	4.55775	4.5997	4.54179	4.20916	4.33802	4.22301	4.31179	4.51858	4.51009	4.00727	4.01577	4.21596	4.37616	4.23786	4.32432	4.35297	4.41386	4.60465	4.52803	3.98784	4.04042	3.93911	4.6319	4.4487	4.32863	chr17	15519208	15527301	8094	-	HAVANA	gene	NA	NA
ENSMUSG00000014778.10	protein_coding	Fhod1	4.76822	4.60588	4.59934	4.8066	4.83621	4.94113	5.00051	4.73851	4.8404	4.75785	5.18404	5.06027	4.79719	4.98244	4.87333	4.79866	5.03995	4.92364	5.02588	5.17234	5.21251	5.02307	4.95088	4.82766	4.86665	4.81664	5.00613	4.80686	4.91404	4.85681	4.92938	4.99285	4.90086	4.95769	5.04168	chr8	105329163	105347953	18791	-	HAVANA	gene	NA	NA
ENSMUSG00000014850.15	protein_coding	Msh3	5.89493	5.78096	5.94666	5.99113	6.03377	6.04945	6.07153	5.89711	5.80008	5.94302	5.6673	5.52713	6.0718	6.0281	6.09762	6.00532	5.88731	5.81496	5.74695	6.05957	6.04518	5.7174	5.63167	5.88896	5.95855	5.88726	5.97764	6.06767	6.08263	6.18528	6.21053	6.03226	5.69928	5.7386	5.81886	chr13	92211872	92355003	143132	-	HAVANA	gene	NA	NA
ENSMUSG00000014856.12	protein_coding	Tmem208	4.33876	4.76255	4.73696	3.77629	3.70987	3.99302	3.95703	3.93641	3.80128	3.68533	3.88361	4.14069	3.74989	3.84488	3.65775	3.84541	3.95987	4.07075	4.21698	4.01171	4.06835	4.1106	4.01417	3.8125	3.80479	3.88723	4.03761	3.91308	3.82436	3.83933	4.00096	4.06113	3.99971	4.21337	3.86057	chr8	105326354	105335219	8866	+	HAVANA	gene	NA	NA
ENSMUSG00000014859.8	protein_coding	E2f4	5.97628	5.84238	5.76397	6.40338	6.12992	6.24988	5.85239	5.98512	6.28446	6.24087	6.42412	6.77813	6.00787	5.87609	5.96168	5.87713	6.51098	6.63275	6.64582	5.46088	5.42754	6.41239	6.55361	6.14253	6.14303	6.21777	6.19903	5.64012	5.64211	5.84567	5.76714	5.78716	6.61245	6.57583	6.49223	chr8	105297663	105305369	7707	+	ENSEMBL	gene	NA	NA
ENSMUSG00000014867.9	protein_coding	Surf4	7.01043	6.98831	7.03773	6.88791	6.89039	7.45282	7.05396	6.74568	6.81926	6.82141	7.30869	7.5643	7.20907	6.63943	6.62971	6.65603	7.48317	7.55543	7.50033	6.23512	6.29242	7.38223	7.24179	6.81101	6.85693	6.74614	7.55062	7.00041	7.00173	6.51812	6.50964	6.55581	7.48412	7.45483	7.39225	chr2	26920040	26933928	13889	-	HAVANA	gene	NA	NA
ENSMUSG00000014873.15	protein_coding	Surf2	5.1766	5.38462	5.3125	5.58536	5.38974	4.22114	3.90775	5.20155	5.35637	5.1688	5.0232	5.08759	4.5317	5.02044	4.96072	5.15272	4.92206	5.21521	5.0578	4.9858	5.18551	5.1177	5.18107	5.3436	5.30907	5.50013	4.14801	4.30338	4.02083	5.3627	4.9815	5.07001	5.38119	5.20609	5.24999	chr2	26916367	26920183	3817	+	HAVANA	gene	NA	NA
ENSMUSG00000014905.3	protein_coding	Dnajb9	4.16666	4.61897	4.60342	3.68362	3.8175	3.68569	3.42388	3.87854	3.75692	3.95374	3.6355	3.46683	3.64208	3.94322	4.35282	4.00857	3.82019	3.51598	3.8145	3.81593	4.04298	3.70536	3.63485	3.64148	4.04774	3.45095	3.61278	3.56107	3.6455	3.76489	3.94955	3.87673	3.42347	3.17526	3.3596	chr12	44205897	44210068	4172	-	ENSEMBL	gene	NA	NA
ENSMUSG00000014907.9	protein_coding	Naf1	3.95746	2.98563	3.31557	5.65513	5.2914	4.08365	3.38119	4.88012	5.17926	5.62158	5.02909	5.25792	4.49044	4.82467	4.9067	4.93227	5.23183	5.30399	5.14221	3.30341	3.65862	4.86834	4.5809	5.42965	5.46009	5.45179	4.07953	3.38303	3.07182	4.7754	4.56958	4.68125	5.33664	5.21709	5.37972	chr8	66860217	66890564	30348	+	HAVANA	gene	NA	NA
ENSMUSG00000014956.15	protein_coding	Ppp1cb	7.5784	7.27676	7.29748	7.95817	7.83898	8.06731	7.71288	7.89671	7.81084	8.08596	7.89929	8.07717	7.83609	7.8984	7.9201	7.85507	8.07	7.86417	8.05735	7.62751	7.6634	7.95612	7.69556	7.89148	7.81894	7.8171	8.1127	7.78428	7.71908	7.80196	7.66648	7.90238	7.80903	7.67652	8.03883	chr5	32458843	32517433	58591	+	HAVANA	gene	NA	NA
ENSMUSG00000014959.12	protein_coding	Gorasp2	5.80464	5.52263	5.54627	6.15276	6.05981	6.09572	5.69729	5.81469	6.09754	6.11448	6.22328	6.63579	5.99286	5.80815	5.95544	5.8449	6.4127	6.5932	6.55499	5.4804	5.46984	6.4301	6.41718	6.0539	6.13896	6.12155	6.18264	5.59588	5.70315	5.77186	5.80326	5.78067	6.43727	6.51919	6.43502	chr2	70661576	70712636	51061	+	HAVANA	gene	NA	NA
ENSMUSG00000014980.14	protein_coding	Tsen15	3.79125	3.67495	3.72975	4.28743	3.91766	3.77915	3.53191	3.97788	3.8948	4.36802	3.91244	4.05967	4.1341	3.93451	4.13415	3.79397	3.90646	3.9967	4.08425	3.51972	3.4482	3.89751	3.81712	4.15711	4.1269	4.06007	3.83894	3.42665	2.99695	3.54398	3.67354	3.72334	4.09685	4.08316	4.04168	chr1	152370735	152386688	15954	-	HAVANA	gene	NA	NA
ENSMUSG00000015002.16	protein_coding	Efr3a	7.46855	7.50482	7.48589	7.3275	7.28713	7.66809	7.46421	7.21765	7.1768	7.03893	7.44248	7.57878	7.26147	7.45323	7.45899	7.50343	7.696	7.60166	7.66257	7.3885	7.44439	7.61945	7.52204	7.28259	7.35618	7.32522	7.58861	7.43949	7.38632	7.41794	7.38183	7.5037	7.50801	7.55432	7.57856	chr15	65787034	65873816	86783	+	HAVANA	gene	NA	NA
ENSMUSG00000015016.7	protein_coding	Acsf3	3.44697	3.46495	3.43063	3.51736	3.36749	4.09822	3.79302	3.34704	3.50282	3.42709	3.41175	3.73064	3.75254	3.27984	3.14175	2.97715	3.78732	3.69228	3.85352	2.48939	2.29031	3.37479	3.23128	3.58472	3.59094	3.4867	4.18104	3.451	3.32406	2.99169	3.06832	2.97691	3.86577	3.89507	3.79477	chr8	122775505	122817880	42376	+	ENSEMBL	gene	NA	NA
ENSMUSG00000015023.7	protein_coding	Ddx19a	5.74079	5.32201	5.44887	6.39353	6.08447	6.32379	6.01599	5.97842	6.19225	6.26365	6.24045	6.54249	6.22032	6.05445	6.09263	5.98535	6.35639	6.38511	6.37958	5.23197	5.27903	6.0901	6.04813	6.2053	6.20183	6.25542	6.43434	6.08508	6.00527	5.52052	5.69888	5.74041	6.31295	6.22023	6.23785	chr8	110974996	110997800	22805	-	HAVANA	gene	NA	NA
ENSMUSG00000015027.10	protein_coding	Galns	4.32566	4.21738	4.42441	4.46044	3.94381	5.05565	4.65714	3.89732	4.15024	3.9352	4.35882	4.75855	4.28	4.28435	4.24615	4.32555	4.87977	4.91844	4.83166	3.10548	3.20176	4.61471	4.60538	4.35591	4.35833	4.37734	5.149	4.56685	4.38744	3.54398	3.80662	3.41301	4.80478	4.66281	4.63741	chr8	122578238	122611487	33250	-	ENSEMBL	gene	NA	NA
ENSMUSG00000015087.14	protein_coding	Rabl6	5.99648	5.94074	5.91125	6.19623	6.15812	6.12473	5.70729	5.95169	6.08792	6.07897	6.10258	6.13747	5.95209	6.01612	6.08827	6.06935	6.26563	6.27072	6.27524	5.87704	6.02074	6.0995	6.214	6.17359	6.28945	6.15038	6.03924	5.78123	5.80092	5.86329	5.84517	5.85799	6.16413	6.33288	6.1509	chr2	25583018	25608521	25504	-	HAVANA	gene	NA	NA
ENSMUSG00000015092.9	protein_coding	Edf1	5.74005	5.73602	5.67472	5.87226	5.72244	5.93692	5.74986	5.69825	5.92495	5.89659	5.98773	6.21804	5.91701	5.60442	5.63259	5.65531	5.90525	6.11819	6.06364	5.21493	5.26435	5.90291	5.96903	5.70583	5.59172	5.95698	5.98513	5.62549	5.60337	5.30333	5.54268	5.41863	5.94205	5.95334	5.90801	chr2	25557847	25562082	4236	+	HAVANA	gene	NA	NA
ENSMUSG00000015095.12	protein_coding	Fbxw5	4.91587	5.2886	5.10292	4.68534	4.52009	4.45865	4.45242	4.83193	4.7795	4.74263	4.71042	4.72351	4.62361	4.56258	4.65768	4.58417	4.68585	4.75966	4.71545	4.74029	4.56952	4.63363	4.72417	4.64648	4.63623	4.54211	4.58192	4.47486	4.57357	4.51613	4.68724	4.59099	4.62694	4.72578	4.58831	chr2	25500750	25505471	4722	+	HAVANA	gene	NA	NA
ENSMUSG00000015120.15	protein_coding	Ube2i	7.80913	7.84743	7.79763	7.85919	7.71419	7.82161	7.6086	7.78503	7.83111	7.85094	7.92648	8.10943	7.74943	7.67055	7.79442	7.70301	7.95064	8.0244	7.98397	7.61584	7.72887	7.9894	8.02152	7.72405	7.84413	7.78794	7.80961	7.62193	7.51807	7.61226	7.56358	7.58857	7.88298	7.90844	7.86309	chr17	25261916	25274622	12707	-	HAVANA	gene	NA	NA
ENSMUSG00000015126.9	protein_coding	Tsr3	3.79485	4.03724	3.93118	3.63776	3.59035	3.78456	3.49981	3.28567	3.54218	3.47396	3.83612	3.99642	3.7173	3.2502	3.37619	3.71697	3.66142	3.89119	3.90803	3.37739	3.34908	3.79001	4.06967	3.40325	3.53472	3.75144	3.72249	3.37923	3.56087	2.98301	3.36431	3.47474	3.94809	3.7881	3.71122	chr17	25240170	25242798	2629	+	ENSEMBL	gene	NA	NA
ENSMUSG00000015127.14	protein_coding	Unkl	5.61406	5.39849	5.50712	5.29389	5.72475	5.52659	5.57508	5.80189	5.71583	5.46495	5.79986	5.75064	5.69795	6.02108	5.92467	5.92932	5.7026	5.74318	5.6353	6.24828	6.16562	5.94127	5.99961	5.63664	5.65046	5.55362	5.56384	5.69548	5.75943	5.98072	6.1098	6.14427	5.59876	5.6978	5.75668	chr17	25188397	25234443	46047	+	HAVANA	gene	NA	NA
ENSMUSG00000015133.17	protein_coding	Lrrk1	4.27808	4.98516	4.91545	3.94645	3.03589	4.86437	4.55841	3.28231	3.88871	2.60726	5.27371	6.08889	4.05024	1.99333	2.4563	3.12072	4.29707	4.57435	5.37004	2.02224	2.38802	5.3888	5.60627	2.56937	2.77215	3.76938	4.15988	2.73014	3.69949	1.89306	1.3555	1.52174	4.28852	3.78111	4.03356	chr7	66226912	66388350	161439	-	HAVANA	gene	NA	NA
ENSMUSG00000015143.14	protein_coding	Actn1	7.65677	7.86784	7.85149	7.71362	7.87973	6.84104	7.51528	7.7946	7.78551	7.68211	6.967	6.46277	7.09334	8.25166	8.07216	7.978	6.39743	6.16705	6.01538	8.8731	8.72729	6.69712	6.96703	7.72323	7.73224	7.66144	6.78368	8.27662	8.40576	8.2837	8.47484	8.38217	6.1682	6.50729	6.24366	chr12	80167542	80260371	92830	-	ENSEMBL	gene	NA	NA
ENSMUSG00000015149.14	protein_coding	Sirt2	5.02498	4.80184	4.87403	5.02592	5.15627	5.33164	5.46648	5.29539	5.44396	5.15915	5.32798	5.2651	5.47267	5.27711	5.22861	5.20536	4.92606	4.98395	5.12503	5.32254	5.18888	5.0855	5.13065	5.19201	5.17457	5.10681	5.19999	5.51291	5.65163	5.04998	5.338	5.16965	4.89104	5.03016	5.04976	chr7	28766735	28788661	21927	+	HAVANA	gene	NA	NA
ENSMUSG00000015165.16	protein_coding	Hnrnpl	8.4769	8.0213	8.09196	8.98867	8.87351	9.15192	8.85265	8.84	9.01366	8.96525	9.0004	9.23254	8.96964	8.7805	8.74907	8.78819	9.09484	9.18003	9.12537	8.4428	8.53748	8.96036	8.96883	8.8968	8.85353	8.93143	9.2827	8.63727	8.44873	8.64881	8.69842	8.65065	9.09809	9.04161	9.00602	chr7	28808541	28822266	13726	+	HAVANA	gene	NA	NA
ENSMUSG00000015176.9	protein_coding	Nolc1	6.39057	5.93845	5.96123	7.86477	7.31745	6.05457	5.32349	6.95364	7.35875	7.66579	7.02079	7.46389	6.4612	6.76725	6.93064	6.89499	7.37376	7.66511	7.51395	5.46276	5.82528	7.20955	7.2127	7.43247	7.4632	7.65672	6.22473	5.01151	4.61588	6.49064	6.51142	6.40198	7.55927	7.45328	7.44015	chr19	46075863	46085528	9666	+	ENSEMBL	gene	NA	NA
ENSMUSG00000015189.12	protein_coding	Casd1	5.24429	5.56956	5.58757	5.18595	5.30154	4.55947	4.4729	4.97875	4.89638	5.23411	4.87191	4.56253	4.64136	5.21487	5.20198	5.25462	4.81095	4.6483	4.70498	4.83928	5.0009	4.69698	4.50745	5.29246	5.21449	5.12881	4.67931	4.72496	4.7787	5.03839	5.066	5.19176	4.82555	4.66281	4.93226	chr6	4600839	4643355	42517	+	HAVANA	gene	NA	NA
ENSMUSG00000015214.14	protein_coding	Mtmr1	6.13913	6.17301	6.21557	6.07106	5.75483	6.50553	6.35712	5.94822	5.90699	5.84052	6.44381	6.64125	6.28333	5.75145	5.83798	5.76866	6.26134	6.26218	6.41413	5.53435	5.64643	6.31544	6.17935	5.82018	5.93894	5.93322	6.42646	6.30822	6.36041	5.8567	5.67834	5.70039	6.31309	6.17072	6.4562	chrX	71364760	71419196	54437	+	HAVANA	gene	NA	NA
ENSMUSG00000015217.11	protein_coding	Hmgb3	4.43617	4.12901	4.44013	4.59415	3.84339	5.63599	5.21203	4.43779	4.71055	4.72239	5.13898	5.621	5.71905	3.89927	3.8986	3.92682	5.27502	5.39805	5.42448	2.83276	2.62577	5.13234	5.18125	4.18765	4.01579	4.21937	5.68873	4.96885	4.70903	3.57425	3.38024	3.36557	5.17791	5.06609	5.22533	chrX	71555918	71560676	4759	+	HAVANA	gene	NA	NA
ENSMUSG00000015243.4	protein_coding	Abca1	4.71158	5.90008	6.11251	3.11074	2.64765	4.44732	4.6209	3.22031	2.83577	2.64515	2.8285	2.29487	4.71023	3.48496	3.27719	3.72073	2.89776	2.98451	2.58978	4.62393	4.09876	2.47417	3.18655	3.25366	2.96235	2.57534	4.28242	5.37338	4.81305	3.92572	3.98062	3.82867	2.33811	2.59108	2.71572	chr4	53030787	53159895	129109	-	HAVANA	gene	NA	NA
ENSMUSG00000015247.10	protein_coding	Nipsnap3b	4.31297	4.4051	4.50014	4.40995	4.4849	4.07999	4.10429	4.29196	4.26983	4.28943	4.21699	4.3438	4.10242	4.17008	4.34034	4.28547	4.34329	4.29905	4.33304	3.87822	3.89541	4.25882	4.19217	4.31828	4.24339	4.31475	4.072	3.67939	3.67301	4.00723	4.06033	4.09577	4.18787	3.95762	4.34731	chr4	53011880	53022060	10181	+	HAVANA	gene	NA	NA
ENSMUSG00000015289.4	protein_coding	Lage3	3.49955	3.50579	3.42323	3.73614	3.57135	3.78816	3.46535	3.50668	3.63599	3.49611	3.48307	3.89157	3.52294	3.41055	3.45012	3.4212	3.77292	3.79845	3.83443	2.88728	3.07336	3.50383	3.51073	3.54183	3.78371	3.65783	3.95813	3.32493	3.53281	3.30704	2.94774	3.11287	3.89554	3.74102	3.54324	chrX	74351276	74353618	2343	-	HAVANA	gene	NA	NA
ENSMUSG00000015290.15	protein_coding	Ubl4a	4.61652	4.45832	4.33633	4.79226	4.71551	4.85345	4.7213	4.83668	4.91354	4.55399	4.96832	5.04322	4.70846	4.78361	4.77392	4.63712	4.97825	5.04862	5.00773	4.76562	4.74837	4.98285	4.98921	4.71265	4.5917	4.8041	4.88091	4.44132	4.58054	4.85285	4.70328	4.8588	5.20158	5.20995	5.08298	chrX	74365718	74373218	7501	-	HAVANA	gene	NA	NA
ENSMUSG00000015291.10	protein_coding	Gdi1	6.66521	6.74018	6.72566	6.42534	6.67901	6.33383	6.41117	6.95969	6.75591	6.57062	6.65541	6.22703	6.43092	6.9341	6.73954	6.91591	6.3416	6.25287	6.19521	7.21612	7.08673	6.49002	6.52886	6.71001	6.61216	6.57633	6.32554	6.4165	6.59567	6.93996	6.9719	6.93098	6.18034	6.40999	6.30065	chrX	74304998	74311862	6865	+	HAVANA	gene	NA	NA
ENSMUSG00000015314.10	protein_coding	Slamf6	7.35116	7.22337	7.29813	7.51635	7.52368	7.71226	8.00038	7.40064	7.34214	7.61984	6.75781	6.13903	7.77244	7.89096	7.74815	7.7813	6.92058	6.66927	6.61819	8.00117	7.79707	6.61114	6.79624	7.91846	7.85666	7.78749	7.90968	8.41184	8.31278	7.747	7.7123	7.63454	6.60946	6.813	6.79836	chr1	171917515	171953170	35656	+	HAVANA	gene	NA	NA
ENSMUSG00000015316.11	protein_coding	Slamf1	4.84664	4.6877	4.57041	5.23236	5.78889	4.26243	4.43165	5.3171	5.4707	5.68889	5.10735	4.94726	5.1963	5.56443	5.73027	5.64874	5.33019	5.0631	4.84888	4.51925	4.73252	4.68292	4.2951	5.07842	5.06311	5.04839	4.2594	4.60804	4.35782	5.59984	5.76714	5.56469	4.92029	4.90425	5.02537	chr1	171767127	171801184	34058	+	HAVANA	gene	NA	NA
ENSMUSG00000015341.17	protein_coding	Golga7	6.15501	5.9687	6.10049	6.12989	6.11935	6.38449	6.11689	6.22767	6.23111	6.14536	6.67414	6.86442	6.56088	6.14609	6.09563	6.18422	6.47677	6.52529	6.68887	5.84951	6.02122	6.48407	6.34765	6.11647	5.87852	6.15444	6.33062	6.09972	6.14993	6.16328	5.99458	6.27569	6.4944	6.35238	6.53036	chr8	23241346	23257074	15729	-	HAVANA	gene	NA	NA
ENSMUSG00000015355.13	protein_coding	Cd48	6.71043	6.79342	7.04026	6.35907	6.21291	7.01857	6.56531	6.1657	6.24688	6.17439	6.65878	6.94446	6.39868	6.3995	6.37724	6.32053	6.87355	6.82329	6.8454	6.1826	6.21775	6.64677	6.38355	6.25385	6.08929	6.27643	6.88063	6.55281	6.83299	6.30809	6.40284	6.18332	6.80903	6.93571	6.78873	chr1	171682009	171705258	23250	+	HAVANA	gene	NA	NA
ENSMUSG00000015357.10	protein_coding	Clpx	5.14716	5.12079	5.08781	5.39942	5.03581	5.45843	4.89825	5.10733	5.25336	5.45155	5.34722	5.50369	5.17056	4.94937	5.00652	5.00194	5.433	5.43005	5.49563	4.86799	4.87655	5.57111	5.46759	5.23808	5.13975	5.24077	5.33354	4.98674	4.91373	4.85681	4.70595	4.9382	5.25862	5.3159	5.42703	chr9	65294260	65330658	36399	+	HAVANA	gene	NA	NA
ENSMUSG00000015363.13	protein_coding	Trabd	5.84158	6.00405	5.97962	5.41047	5.56007	5.8979	5.92354	5.52139	5.45328	5.41911	5.75184	5.83159	5.6029	5.63595	5.46351	5.43946	5.78483	5.78924	5.9081	5.58364	5.69224	5.6914	5.66336	5.79643	5.64673	5.53787	6.10529	5.80267	5.93509	5.68156	5.68778	5.67864	5.83859	5.76382	5.62393	chr15	89075124	89087077	11954	+	HAVANA	gene	NA	NA
ENSMUSG00000015377.9	protein_coding	Dennd6b	3.68646	4.31429	4.18974	3.27559	3.45495	2.5395	2.56901	3.35231	3.27441	3.29029	2.66945	2.48411	2.47145	3.43806	3.62069	3.37738	2.89776	2.75221	2.71194	4.08308	3.92827	3.13022	3.22498	3.5309	3.58486	3.17059	2.13956	2.79815	2.76594	3.5976	3.635	3.51471	2.98053	3.01744	2.58835	chr15	89182217	89196474	14258	-	ENSEMBL	gene	NA	NA
ENSMUSG00000015396.3	protein_coding	Cd83	3.45178	4.96842	4.89689	3.27021	3.0031	0.113808	-0.281267	2.84782	3.27441	3.01439	1.40833	1.10837	0.166518	2.57946	1.77843	2.10565	1.87122	0.507577	0.345486	3.40092	3.30544	2.82094	1.35073	4.38653	3.44421	3.14922	1.88831	1.81725	-0.0138941	2.45439	2.26328	2.4696	0.938169	0.760109	1.52022	chr13	43785107	43803130	18024	+	ENSEMBL	gene	NA	NA
ENSMUSG00000015437.4	protein_coding	Gzmb	5.74211	2.90807	3.31955	8.53546	7.75666	9.5252	8.9611	7.91202	8.97701	7.86611	10.7742	11.6989	9.46565	5.87985	6.43861	7.11388	10.399	10.8842	11.0767	4.20509	5.10515	10.9981	10.7104	6.82962	6.98419	8.47903	9.27667	7.06716	7.35793	5.29362	4.44146	5.25611	10.9198	10.7141	10.9497	chr14	56258856	56262260	3405	-	ENSEMBL	gene	NA	NA
ENSMUSG00000015461.15	protein_coding	Atf6b	4.84715	4.86235	4.77589	4.91477	5.01541	4.7117	4.33057	4.8783	4.89334	4.79625	4.97601	4.90004	4.49288	4.81683	4.87107	4.75775	5.05465	5.25031	5.11241	4.8159	4.72986	5.13504	5.13233	4.98745	5.10831	4.91551	4.72325	4.24006	4.23289	4.85681	4.80184	4.9382	5.26243	5.29182	5.0618	chr17	34647146	34655074	7929	+	HAVANA	gene	NA	NA
ENSMUSG00000015474.16	protein_coding	Ppt2	3.47567	3.72117	3.79085	3.25394	3.17486	3.57037	3.49234	3.23749	3.20751	3.27224	2.78684	2.30606	3.48904	3.26456	3.45614	3.27195	2.9499	2.5979	2.87773	3.27797	3.31966	3.03219	2.71472	3.22005	3.43071	3.35438	3.61366	3.56693	3.94496	3.22764	3.51281	3.41301	2.98053	2.80058	2.63207	chr17	34616662	34628510	11849	-	HAVANA	gene	NA	NA
ENSMUSG00000015488.14	protein_coding	Cacfd1	4.26506	3.82163	3.79944	4.49315	4.8775	4.47269	4.86765	5.06145	4.8903	4.78568	4.60846	4.51752	4.51471	4.86322	4.64191	4.75775	4.59052	4.57894	4.57302	4.97478	4.85475	4.43937	4.50485	4.77008	4.72182	4.64745	4.60819	4.78844	4.76623	4.79389	5.07563	4.99963	4.64457	4.69988	4.64276	chr2	27009926	27021089	11164	+	HAVANA	gene	NA	NA
ENSMUSG00000015501.10	protein_coding	Hivep2	7.66929	7.67684	7.6646	7.71539	8.19124	7.08772	7.50703	8.02101	7.88692	7.95479	7.32487	7.00824	7.61398	8.21768	8.10775	7.97459	7.13517	7.21855	6.74165	8.15283	8.00813	7.23077	7.3883	8.01853	8.12853	7.78836	6.99407	7.79494	7.64283	8.34729	8.31086	8.33528	7.12497	7.21895	7.18065	chr10	13966075	14151374	185300	+	HAVANA	gene	NA	NA
ENSMUSG00000015522.18	protein_coding	Arnt	5.63981	5.28319	5.23755	5.79099	5.93076	6.12295	6.03101	6.06667	6.02409	5.9054	5.95676	5.9549	5.95564	6.01612	6.05194	6.08111	5.93144	5.87295	5.84275	6.44514	6.34834	6.03374	6.09714	5.95399	6.03012	5.92486	6.03827	6.14898	6.17945	6.19087	6.04943	6.015	5.8764	5.87911	5.86972	chr3	95434388	95497240	62853	+	HAVANA	gene	NA	NA
ENSMUSG00000015536.14	protein_coding	Mocs2	4.4893	4.72809	4.65803	4.0124	4.21831	4.60863	4.79904	4.18093	4.13489	3.86869	4.31796	4.22502	4.40732	4.25758	4.08835	4.23726	4.38493	4.093	4.1962	4.48259	4.34111	4.2723	4.3041	4.21627	3.98639	4.06768	4.6263	4.70486	4.74351	4.38199	4.25923	4.03837	4.21173	4.12269	4.34731	chr13	114818236	114832275	14040	+	HAVANA	gene	NA	NA
ENSMUSG00000015575.14	protein_coding	Atp6v0e	5.52092	5.53613	5.64509	5.3157	5.50844	5.57498	5.36424	5.37386	5.4615	5.37044	5.61864	5.71364	5.36064	5.4219	5.314	5.37089	5.48988	5.60005	5.62789	5.26327	5.3308	5.53354	5.54557	5.40144	5.22234	5.53513	5.50834	5.17938	5.27405	5.39401	5.43465	5.50238	5.6419	5.73095	5.45468	chr17	26676396	26699644	23249	+	ENSEMBL	gene	NA	NA
ENSMUSG00000015597.16	protein_coding	Zfp318	5.8852	6.25683	6.40386	5.96679	6.05991	4.82988	5.04677	5.74304	5.7471	6.0729	4.73071	4.18921	5.14746	6.37124	6.28973	6.21781	4.54887	4.3129	4.24327	6.17113	6.1226	4.69097	4.65313	5.93028	6.0622	5.88987	4.85196	5.55704	5.41971	6.48068	6.55507	6.33602	4.60308	4.76128	4.47883	chr17	46383731	46420920	37190	+	HAVANA	gene	NA	NA
ENSMUSG00000015605.5	protein_coding	Srf	5.77979	5.89476	5.92309	5.74031	5.52586	5.34849	5.53948	5.66372	5.72164	5.75104	5.84022	5.99953	5.50937	5.53608	5.36931	5.44553	5.86623	5.90347	5.83796	5.55391	5.50269	5.82455	5.92108	5.7489	5.69692	5.61522	5.49432	5.31985	5.44183	5.5463	5.47883	5.60148	5.86641	5.82502	5.78511	chr17	46546839	46556162	9324	-	ENSEMBL	gene	NA	NA
ENSMUSG00000015619.10	protein_coding	Gata3	4.81335	4.19642	4.21778	5.09756	5.28118	6.42476	5.99132	5.31979	5.36723	5.52326	5.6548	5.47919	6.21313	5.0056	5.17302	5.0224	5.28354	5.08263	5.32699	5.21045	5.14763	5.37637	5.6842	5.24478	5.06747	5.27569	6.27726	6.2608	6.32429	5.12128	5.12744	5.09655	5.0092	5.08323	4.87428	chr2	9857078	9890034	32957	-	HAVANA	gene	NA	NA
ENSMUSG00000015656.16	protein_coding	Hspa8	10.9971	10.6617	10.6691	11.7841	11.6082	11.4433	11.4289	11.2205	11.5585	11.7829	11.4805	11.7012	11.1825	10.954	11.1743	11.1592	11.5317	11.4993	11.7021	9.83986	10.1481	11.5227	11.2883	11.4838	11.6685	11.6644	11.4804	11.316	11.2666	10.806	10.8155	10.8492	11.7493	11.7315	11.6791	chr9	40800984	40805200	4217	+	HAVANA	gene	NA	NA
ENSMUSG00000015668.13	protein_coding	Pdzd11	3.80098	3.80645	3.62218	3.96871	3.56564	4.57882	4.28922	3.53812	3.79674	4.03256	4.13295	4.35833	4.11254	3.6727	3.41517	3.68066	4.21305	4.26689	4.37752	2.98497	2.82385	4.19011	4.09821	3.52436	3.88044	4.0553	4.61082	4.23166	4.22328	3.25473	2.81615	3.20808	4.00363	4.37688	4.12253	chrX	100622883	100626568	3686	-	HAVANA	gene	NA	NA
ENSMUSG00000015671.10	protein_coding	Psma2	6.73872	6.49193	6.54335	7.19638	6.9231	7.25835	6.79678	6.91725	7.03517	7.29093	7.19749	7.48988	7.18866	6.65672	6.91924	6.80099	7.42723	7.48602	7.50854	5.5127	5.87428	7.2148	7.12567	7.03543	7.1343	7.12685	7.3397	6.83943	6.75119	6.3177	6.19781	6.43571	7.29932	7.20981	7.20618	chr13	14613242	14625671	12430	+	ENSEMBL	gene	NA	NA
ENSMUSG00000015672.3	protein_coding	Mrpl32	4.03155	4.11552	4.03589	4.4197	4.05196	4.3863	4.01403	3.99141	4.30225	4.15142	4.2196	4.3707	4.21625	3.64104	3.72415	3.67493	4.0646	4.26811	4.19918	2.69562	3.21704	4.12553	4.03162	4.05785	3.74062	4.16669	4.30508	4.21895	4.30017	3.71869	3.33191	3.50062	4.2196	4.27081	4.00058	chr13	14610301	14613037	2737	-	ENSEMBL	gene	NA	NA
ENSMUSG00000015697.14	protein_coding	Setdb1	6.51085	6.35286	6.5164	6.70193	6.6597	6.63544	6.272	6.58818	6.62028	6.82903	6.62911	6.59532	6.64071	6.63057	6.50129	6.71987	6.73555	6.70349	6.71378	6.38715	6.4004	6.59584	6.53748	6.73834	6.75647	6.72589	6.51967	6.27506	6.20914	6.58461	6.43097	6.46703	6.57856	6.6878	6.71532	chr3	95323525	95357202	33678	-	HAVANA	gene	NA	NA
ENSMUSG00000015711.8	protein_coding	Prune	3.86127	3.90149	3.78221	3.79728	3.70987	4.32879	4.05987	3.77718	3.77449	3.68987	4.01525	4.10522	3.83966	3.76568	3.79239	3.84541	3.7486	3.65362	3.82286	4.03326	3.89541	3.92163	3.90716	3.72073	3.70743	3.79253	4.26601	3.88994	4.15467	3.9424	3.69866	3.66133	3.85572	3.90418	4.10511	chr3	95253674	95282076	28403	-	HAVANA	gene	NA	NA
ENSMUSG00000015714.11	protein_coding	Cers2	6.57138	6.62834	6.63579	6.49678	6.51281	6.45832	5.96026	6.42817	6.52717	6.42301	6.64329	6.88879	6.28404	6.4753	6.5271	6.49174	6.66059	6.81796	6.81115	6.44514	6.47128	6.7702	6.72986	6.46874	6.46106	6.4371	6.37077	6.10459	6.09521	6.41798	6.62555	6.44678	6.7355	6.67888	6.67707	chr3	95314791	95323599	8809	+	HAVANA	gene	NA	NA
ENSMUSG00000015733.13	protein_coding	Capza2	7.32287	7.26161	7.26425	7.40443	7.27431	7.64874	7.34154	7.21657	7.33292	7.43242	7.58352	7.86453	7.51861	7.11699	7.22902	7.28158	7.69314	7.68627	7.84124	6.76352	6.90237	7.62235	7.47631	7.26167	7.20189	7.26774	7.62156	7.39704	7.41656	7.01676	6.91541	7.16351	7.60878	7.40921	7.73961	chr6	17636234	17666972	30739	+	HAVANA	gene	NA	NA
ENSMUSG00000015745.9	protein_coding	Plekho1	4.21875	4.99625	4.95058	2.97839	3.67906	2.40536	2.92656	4.1174	4.11417	3.81567	3.11334	2.40305	2.62203	4.36896	4.45305	4.28547	3.20004	2.71098	2.4158	4.13123	4.03555	2.98712	2.86017	3.66685	3.38246	3.23959	2.86142	3.12003	3.62961	4.35733	4.63613	4.34493	3.13824	3.7612	3.08953	chr3	95988429	95996001	7573	-	HAVANA	gene	NA	NA
ENSMUSG00000015747.5	protein_coding	Vps45	3.85261	3.74498	3.70506	3.84874	3.71999	4.10545	4.15585	3.96075	3.8948	3.96921	4.11684	4.15867	4.07982	3.91507	3.92858	3.89952	3.98353	4.01383	4.06151	3.59885	3.63038	3.85151	3.80093	4.02319	4.08444	4.14167	4.10189	4.19392	4.19988	4.03859	3.98062	3.75931	4.13062	3.91322	4.10511	chr3	95999832	96058466	58635	-	HAVANA	gene	NA	NA
ENSMUSG00000015748.13	protein_coding	Prpf3	5.23144	4.62207	4.77444	6.119	5.77439	5.6816	5.42505	5.74203	5.85797	5.95244	5.87792	5.98742	5.71293	5.66243	5.68611	5.71184	5.87861	5.97314	6.00432	5.38941	5.33955	5.86515	5.85626	5.8611	5.90274	6.06929	5.69152	5.39394	5.29156	5.60508	5.56334	5.60148	6.03413	6.05493	5.90133	chr3	95830124	95855885	25762	-	HAVANA	gene	NA	NA
ENSMUSG00000015749.12	protein_coding	Anp32e	6.60563	5.68579	5.61945	7.76331	7.3406	8.07232	7.59216	7.54185	7.62678	7.88182	7.86833	8.08316	8.01655	7.13548	7.21087	7.36567	8.08989	7.98847	8.08015	6.2766	6.36815	7.71707	7.58033	7.69292	7.53629	7.71634	8.11281	7.52941	7.40172	6.81764	6.84118	6.95961	7.89632	7.86289	7.90968	chr3	95929246	95947390	18145	+	HAVANA	gene	NA	NA
ENSMUSG00000015750.15	protein_coding	Aph1a	5.64066	5.55854	5.51067	5.62916	5.41566	6.13152	5.82828	5.51754	5.56948	5.32699	6.04253	6.18895	5.74956	5.55368	5.53972	5.62797	6.10851	6.09841	6.15684	5.37334	5.39624	5.96753	5.9143	5.56581	5.52486	5.39683	6.1931	5.93899	5.90204	5.42225	5.52297	5.37386	5.97156	6.00192	5.94454	chr3	95893969	95898288	4320	+	HAVANA	gene	NA	NA
ENSMUSG00000015755.16	protein_coding	Tab2	6.98069	6.60909	6.6635	7.08929	7.21291	7.35136	7.35814	7.35645	7.39195	7.28419	7.60366	7.564	7.79218	7.17178	7.09888	7.28582	7.40911	7.40172	7.39718	7.21781	7.2315	7.45835	7.52301	7.10568	7.10646	7.2173	7.32512	7.39978	7.35544	7.23379	7.18249	7.14889	7.34947	7.35131	7.4278	chr10	7905653	7956230	50578	-	HAVANA	gene	NA	NA
ENSMUSG00000015757.10	protein_coding	Ppil4	6.32954	6.36929	6.41135	6.23818	6.24131	6.16852	6.09625	6.31204	6.254	6.35674	6.25743	6.27693	6.23959	6.22496	6.26163	6.38438	6.297	6.29604	6.2336	6.33842	6.34574	6.27717	6.39342	6.25468	6.12114	6.33515	6.14262	6.27621	6.22481	6.27391	6.37193	6.39056	6.25304	6.25319	6.20979	chr10	7792891	7823135	30245	+	HAVANA	gene	NA	NA
ENSMUSG00000015759.10	protein_coding	Cnih1	4.84423	4.42489	4.56538	5.30521	5.09146	5.47108	5.17311	5.12435	5.24983	5.43407	5.58155	5.84795	5.25078	4.95176	5.15276	5.02646	5.64422	5.5342	5.57137	4.07817	4.19833	5.45768	5.32745	5.17982	5.12725	5.13787	5.4915	5.14061	4.96264	4.80761	4.64262	4.86305	5.51021	5.28835	5.56312	chr14	46775582	46788411	12830	-	HAVANA	gene	NA	NA
ENSMUSG00000015776.12	protein_coding	Med22	5.29004	5.4852	5.52161	5.45028	5.30154	4.89181	4.66902	5.25098	5.14519	5.19473	5.20813	5.35539	4.97101	5.08605	5.17302	5.08016	5.19089	5.11302	5.0836	4.93192	4.90277	5.0624	5.00745	5.15869	5.13975	5.19979	5.00218	4.68703	4.65699	5.03451	4.91337	5.1472	5.26243	5.16123	5.02127	chr2	26905262	26910677	5416	-	HAVANA	gene	NA	NA
ENSMUSG00000015790.16	protein_coding	Surf1	4.71822	4.8931	4.68972	4.22204	4.43998	5.04252	5.23435	4.52127	4.4909	4.21894	4.85689	4.9046	4.97874	4.07253	4.2713	4.4265	4.58778	4.68371	4.72587	4.73718	4.47738	4.57418	4.65269	4.39559	4.29025	4.41959	5.05471	5.26426	5.41652	4.51412	4.4265	4.52287	4.74063	4.76628	4.7106	chr2	26913381	26916530	3150	-	HAVANA	gene	NA	NA
ENSMUSG00000015804.14	protein_coding	Med28	5.33994	5.32328	5.13947	5.50285	5.50844	5.39348	5.36059	5.44459	5.31937	5.48328	5.47188	5.60117	5.34041	5.53448	5.59488	5.36289	5.56145	5.56345	5.56327	5.25025	5.06351	5.40969	5.43518	5.60916	5.60829	5.39695	5.39369	5.42499	5.43712	5.29362	5.24298	5.50944	5.51661	5.59421	5.56029	chr5	45520229	45529276	9048	+	HAVANA	gene	NA	NA
ENSMUSG00000015806.12	protein_coding	Qdpr	4.87701	4.35006	4.50672	5.70983	5.29817	5.54339	5.04221	5.32381	5.30573	5.64281	5.36856	5.76523	5.18727	5.06855	5.27194	5.27694	5.59867	5.80085	5.79615	4.32174	4.64769	5.39867	5.2457	5.5441	5.68418	5.47916	5.64659	5.03384	4.94725	4.88296	4.74266	5.08714	5.54818	5.64396	5.56594	chr5	45434021	45450236	16216	-	HAVANA	gene	NA	NA
ENSMUSG00000015837.15	protein_coding	Sqstm1	7.04026	7.14218	7.14032	6.68836	7.01663	7.10312	7.26473	6.82063	6.8811	6.80924	6.64128	6.82407	7.15335	6.99373	7.11896	6.84171	6.65317	6.74097	6.67337	7.29647	7.16368	6.89655	7.11928	6.86019	7.0807	6.78618	7.15846	7.03411	7.06818	7.08564	7.15023	7.15777	6.70929	6.68801	6.57765	chr11	50199366	50210827	11462	-	HAVANA	gene	NA	NA
ENSMUSG00000015839.6	protein_coding	Nfe2l2	6.10639	5.98804	6.07468	5.76252	6.08167	6.11402	6.43919	6.14537	6.14841	5.61204	6.25616	6.25256	6.20868	6.09708	6.06383	6.09952	6.28183	6.46802	6.25672	6.39079	6.55555	6.32388	6.47075	5.70097	5.70254	5.83741	6.16049	6.5165	6.36621	6.23045	6.2561	6.20956	6.23181	6.28315	6.2819	chr2	75675513	75704641	29129	-	HAVANA	gene	NA	NA
ENSMUSG00000015846.14	protein_coding	Rxra	4.88787	4.69587	4.81313	5.33902	5.02361	4.37737	4.58373	5.29812	5.45018	5.32447	5.75815	5.73139	5.08075	4.57192	4.60173	4.38681	5.77764	5.50796	5.05586	4.20958	4.33061	5.56674	5.42558	5.65642	5.79101	5.60349	4.73044	3.8675	3.73063	4.25426	4.4265	4.43664	5.59731	5.64667	5.53748	chr2	27676440	27762957	86518	+	HAVANA	gene	NA	NA
ENSMUSG00000015869.16	protein_coding	Prpsap1	5.07894	4.98407	4.98111	5.15271	5.25705	5.18069	4.97203	5.02893	5.31597	5.04508	5.30356	5.31719	4.92647	5.1643	5.16568	5.0782	5.16539	5.18706	5.20002	5.10347	5.18888	5.28888	5.23319	5.13904	5.32802	5.21529	5.26418	4.94663	4.92723	5.02671	5.24724	5.10589	5.31477	5.43688	5.38292	chr11	116470845	116494202	23358	-	HAVANA	gene	NA	NA
ENSMUSG00000015880.13	protein_coding	Ncapg	5.50246	4.67329	4.76927	6.55727	5.43724	7.80076	7.58301	6.12568	6.48844	6.46926	7.29763	7.53733	7.52813	5.17237	5.33639	5.66098	7.48879	7.31523	7.57681	2.5707	3.50344	7.04912	6.74142	5.99443	5.6835	6.2671	7.7866	7.4451	7.33389	3.77656	3.78719	3.97697	7.28021	7.09279	7.41194	chr5	45669919	45700546	30628	+	HAVANA	gene	NA	NA
ENSMUSG00000015882.17	protein_coding	Lcorl	5.66843	5.73782	5.83431	5.44162	5.59016	5.55083	5.85941	5.34084	5.36614	5.70025	5.40804	5.19866	5.53469	5.6871	5.63179	5.52464	5.62013	5.40587	5.51826	5.5598	5.54613	5.65	5.2599	5.45716	5.59547	5.47246	5.54925	5.56432	5.52618	5.84987	5.84705	5.80494	5.51808	5.21515	5.83118	chr5	45697181	45857615	160435	-	HAVANA	gene	NA	NA
ENSMUSG00000015889.7	protein_coding	Lta4h	6.78822	6.67143	6.63178	6.9192	6.62481	7.28087	7.02537	6.81608	6.96349	6.96172	7.32032	7.50847	7.09599	6.69855	6.79643	6.81337	7.33098	7.34691	7.44578	6.05859	6.29356	7.04219	6.88691	6.73462	6.76044	6.89678	7.24701	6.93369	6.96543	6.46778	6.48638	6.33801	7.21232	7.16507	7.15746	chr10	93453396	93484896	31501	+	ENSEMBL	gene	NA	NA
ENSMUSG00000015932.8	protein_coding	Dstn	4.44017	4.57118	4.68764	4.4862	4.14506	4.99661	4.94297	4.05095	4.32497	4.02777	4.86191	4.91291	4.38379	3.51756	3.83923	3.81289	4.38177	4.40886	4.72377	3.60568	3.4352	4.5025	4.33664	3.83616	3.93952	4.29867	4.86727	4.72995	4.95167	3.45382	3.54087	3.45748	4.37558	4.29869	4.58275	chr2	143915320	143943324	28005	+	HAVANA	gene	NA	NA
ENSMUSG00000015937.14	protein_coding	H2afy	7.84267	7.45796	7.52763	7.93489	8.05141	8.92942	8.74031	8.05289	8.07258	8.00329	8.18171	8.30853	8.74521	8.11251	8.02305	8.01344	8.27735	8.34633	8.34496	7.6255	7.73972	8.03379	7.99943	8.00341	7.90869	7.94765	8.84042	8.71347	8.68535	7.97125	8.00826	7.94872	8.26081	8.22578	8.11138	chr13	56073619	56136361	62743	-	HAVANA	gene	NA	NA
ENSMUSG00000015942.9	protein_coding	Gtf2ird2	4.35482	4.52883	4.49891	4.06857	4.14769	4.25342	4.50281	4.45793	4.34127	4.22019	3.85563	3.64281	4.37215	4.41072	4.40108	4.31337	3.54369	3.77863	3.74433	4.77759	4.56095	3.50839	3.76591	4.33696	4.28864	4.16232	4.36505	4.82499	4.90754	4.47661	4.6432	4.50214	3.60449	3.80074	3.6849	chr5	134184019	134224355	40337	+	HAVANA	gene	NA	NA
ENSMUSG00000015944.9	protein_coding	Gatsl2	3.74512	3.22267	3.14183	3.98309	4.43661	4.28489	4.95272	4.6278	4.38459	4.22833	4.23259	3.96401	3.96121	4.69672	4.47694	4.56477	3.71885	3.45814	3.63267	4.95618	4.67284	4.00797	3.86722	4.4459	4.21612	4.05625	4.19151	4.87871	4.95387	4.78004	4.81913	4.87403	3.77261	4.22795	3.53174	chr5	134099711	134144343	44633	+	HAVANA	gene	NA	NA
ENSMUSG00000015950.13	protein_coding	Ncf1	5.3816	5.66874	5.64007	5.89712	5.2936	5.7636	6.15348	5.38907	5.5126	6.01764	4.76554	4.3774	5.54327	4.87117	4.94778	5.1332	4.58759	4.3429	4.5793	4.50041	4.17845	3.76642	3.30584	6.11269	5.98247	6.11338	5.84737	6.60493	6.85125	4.46511	4.62902	4.8123	4.47645	4.36612	4.29387	chr5	134220053	134229625	9573	-	HAVANA	gene	NA	NA
ENSMUSG00000015961.8	protein_coding	Adss	6.97384	6.64461	6.68664	7.6565	7.59486	7.25144	7.12144	7.34362	7.43044	7.70444	7.02937	7.275	7.1693	7.62498	7.68576	7.54362	7.25961	7.31974	7.26479	6.38881	6.52059	7.03707	6.89983	7.45142	7.50001	7.5278	7.26983	7.28088	7.09921	7.33986	7.33251	7.3152	7.29001	7.24068	7.25681	chr1	177762962	177796511	33550	-	HAVANA	gene	NA	NA
ENSMUSG00000015971.4	protein_coding	Actr8	4.79382	5.00394	4.88752	4.52287	4.51429	4.78105	4.62701	4.42285	4.62877	4.46656	4.58637	4.74011	4.53383	4.59654	4.59355	4.50495	4.6652	4.62407	4.81812	5.0668	5.01189	4.71289	4.71519	4.50849	4.4975	4.57986	4.69656	4.71746	4.80332	4.57612	4.63613	4.58432	4.63284	4.72064	4.45469	chr14	29978337	29993221	14885	+	ENSEMBL	gene	NA	NA
ENSMUSG00000015994.10	protein_coding	Fnta	5.12578	5.30382	5.25326	5.02432	4.86842	4.8939	4.9183	4.98045	4.99602	4.94609	5.11719	5.19611	4.9174	4.8983	4.86882	4.98118	4.93902	4.89837	4.9085	5.13452	5.02714	4.99408	4.94167	5.10261	4.826	5.10126	4.99622	4.85153	4.7787	5.04613	5.07082	4.84084	4.94422	5.0508	5.07769	chr8	25998722	26015650	16929	-	HAVANA	gene	NA	NA
ENSMUSG00000016018.3	protein_coding	Skiv2l2	6.50535	6.19184	6.2768	7.08468	6.76341	6.82632	6.29715	6.6592	6.89109	7.00743	6.93596	7.24732	6.7011	6.54336	6.66866	6.69599	7.09328	7.22222	7.22687	5.97922	6.0731	7.07138	6.90672	6.87837	6.89611	6.9651	6.79684	6.42958	6.21657	6.44016	6.4517	6.30594	7.21034	7.13928	7.21967	chr13	112867780	112927380	59601	-	ENSEMBL	gene	NA	NA
ENSMUSG00000016028.9	protein_coding	Celsr1	6.45651	5.99028	6.02244	6.61559	6.75974	6.97187	6.72462	6.93227	6.99889	6.84038	7.45001	7.51421	7.15509	6.65672	6.82056	6.5848	7.5435	7.3988	7.15868	6.31879	6.20248	7.13624	7.28648	6.84017	6.91562	6.63258	6.97804	6.55351	6.50551	6.62194	6.48998	6.55648	7.32142	7.34297	7.18524	chr15	85898758	86033777	135020	-	ENSEMBL	gene	NA	NA
ENSMUSG00000016087.13	protein_coding	Fli1	7.09206	7.00739	7.07987	6.90711	6.85123	7.86861	7.81635	6.81941	6.89756	6.6572	7.1009	7.36904	7.07778	6.82894	6.88951	6.90604	7.17177	7.291	7.31384	6.91837	6.94255	7.29294	7.30565	6.78031	6.89979	6.98433	7.70427	7.95539	8.03154	6.88388	6.69899	6.92308	7.15091	7.16507	7.09244	chr9	32422204	32542861	120658	-	HAVANA	gene	NA	NA
ENSMUSG00000016181.9	protein_coding	Diexf	5.12264	4.6657	4.78889	6.02147	5.96521	4.73752	4.45242	5.67217	5.6931	5.95433	5.33161	5.32133	4.94445	5.8786	5.83798	5.82915	5.59185	5.58644	5.46617	5.54327	5.72065	5.46826	5.53031	5.92508	6.07743	5.79103	4.74709	4.59989	4.46973	5.92331	5.76714	5.77842	5.76525	5.58574	5.59936	chr1	193091104	193130272	39169	-	HAVANA	gene	NA	NA
ENSMUSG00000016194.14	protein_coding	Hsd11b1	5.43773	5.781	5.89197	4.33202	4.76466	4.93505	5.13078	5.27197	4.73269	4.31022	5.34603	5.06721	4.89539	4.81421	4.88677	5.1599	5.50448	5.4652	5.24408	5.17183	5.36034	5.65584	5.62076	4.27964	4.08444	4.52839	4.59774	5.04388	5.37112	5.36648	5.07082	5.04405	5.39337	5.41156	5.38612	chr1	193221634	193264075	42442	-	HAVANA	gene	NA	NA
ENSMUSG00000016206.6	protein_coding	H2-M3	4.77123	5.15476	5.11788	4.00917	4.39298	4.53559	4.18096	4.63861	4.48486	3.91983	4.70856	4.48342	4.38642	4.35098	4.3533	4.39938	4.62568	4.60843	4.54042	4.16401	4.43881	4.61894	4.57099	4.13923	4.13524	4.2325	4.42522	4.52733	4.41006	4.36971	4.13587	4.52983	4.59705	4.57434	4.50846	chr17	37270220	37274484	4265	+	HAVANA	gene	NA	NA
ENSMUSG00000016252.7	protein_coding	Atp5e	6.02194	5.99194	6.03219	6.05862	6.18212	6.06387	5.83404	6.22502	6.19848	6.33009	6.27072	6.31966	6.14557	6.13853	6.15829	5.95584	6.25012	6.20689	6.26387	5.09378	5.31669	5.89944	5.84499	6.22618	6.05891	6.04444	6.23994	5.68315	5.63527	5.81657	5.92719	5.9255	6.25113	6.36949	6.08361	chr2	174461072	174464105	3034	-	HAVANA	gene	NA	NA
ENSMUSG00000016253.12	protein_coding	Nelfcd	4.99719	5.09528	4.98864	5.05751	4.94379	5.26864	5.18556	4.83005	4.95145	4.99826	5.11999	5.35405	5.2304	4.7904	4.90008	4.77474	5.22656	5.2774	5.23246	4.34234	4.30582	5.02148	5.05267	4.89249	4.97055	4.9028	5.40722	5.03987	5.05985	4.18589	4.57637	4.31302	5.17209	5.12665	4.96682	chr2	174415804	174427502	11699	+	HAVANA	gene	NA	NA
ENSMUSG00000016256.10	protein_coding	Ctsz	5.12506	5.62934	5.53881	5.18023	4.71996	4.8771	4.43165	4.47447	4.83754	4.8761	4.94635	4.87584	4.80381	4.28813	4.45003	4.42727	4.93255	5.17043	5.03761	3.66577	3.99181	4.59553	4.62467	4.90946	4.89886	5.01924	4.95587	4.57795	4.25447	4.01513	4.21637	4.09577	5.02275	5.11101	5.02947	chr2	174427493	174439039	11547	-	HAVANA	gene	NA	NA
ENSMUSG00000016257.15	protein_coding	Slmo2	5.23811	4.80058	4.88079	6.29626	5.60992	5.76385	5.36789	5.51436	5.72932	6.04836	6.11316	6.58724	5.76444	5.0056	5.27364	5.27864	6.35052	6.43358	6.3335	3.96049	4.15932	6.13388	6.10318	5.80892	5.84542	6.00137	5.92891	5.18302	4.96482	4.52169	4.49265	4.84642	6.32043	6.3108	6.28533	chr2	174465067	174473081	8015	-	HAVANA	gene	NA	NA
ENSMUSG00000016308.12	protein_coding	Ube2a	4.42137	4.19834	4.11142	4.62337	4.49673	5.08702	4.8573	4.58595	4.61224	4.5388	4.87688	5.10133	4.94624	4.56258	4.67586	4.54227	4.92606	4.94001	5.09488	3.91169	4.16721	4.79924	4.67874	4.46897	4.55461	4.55841	5.02771	4.76193	4.70221	4.25426	4.44889	4.68125	4.7784	4.80081	4.94965	chrX	36873900	36884222	10323	+	HAVANA	gene	NA	NA
ENSMUSG00000016319.3	protein_coding	Slc25a5	8.18237	7.89051	7.94448	8.92265	8.63983	8.67049	8.428	8.52569	8.77377	8.97315	8.53666	8.89571	8.50481	8.20646	8.40802	8.33141	8.65893	8.74279	8.79563	6.79226	7.12771	8.52735	8.33094	8.62386	8.66812	8.74937	8.84402	8.44004	8.26461	7.94717	7.87131	8.00472	8.75431	8.62999	8.72169	chrX	36795651	36798807	3157	+	HAVANA	gene	NA	NA
ENSMUSG00000016344.14	protein_coding	Ppdpf	5.06108	5.39741	5.39607	4.56083	4.66861	5.11053	5.00988	4.51951	4.54609	4.36234	4.47051	4.38132	4.8097	5.11403	4.93931	4.77956	4.61495	4.54414	4.57533	4.89613	4.72452	4.36833	4.33956	4.63886	4.69949	4.49764	5.17032	5.05584	5.04559	4.68911	5.07078	5.00962	4.48405	4.99651	4.52014	chr2	181187247	181188771	1525	+	HAVANA	gene	NA	NA
ENSMUSG00000016409.4	protein_coding	Nkap	4.86033	4.64194	4.78023	5.10211	4.96096	5.06865	4.86249	5.01903	5.05157	5.04508	5.0644	5.17031	5.14124	4.94219	4.91109	5.05256	5.18727	5.068	5.29941	4.71523	4.91453	5.07014	4.9145	4.95921	4.92316	4.90493	5.28061	5.03183	5.13354	4.78929	4.56958	4.97435	5.08004	4.97075	5.12818	chrX	37126795	37150746	23952	+	HAVANA	gene	NA	NA
ENSMUSG00000016427.7	protein_coding	Ndufa1	4.31409	4.30898	4.3888	4.36016	4.26746	4.71643	4.61477	4.32447	4.38026	4.49537	4.5201	4.53664	4.45325	4.30317	4.30406	4.16915	4.51176	4.69557	4.53096	3.40092	3.58988	4.20922	4.41074	4.2731	4.09303	4.26265	4.64926	4.21184	4.28277	3.7569	4.06033	3.72334	4.39655	4.42423	4.00889	chrX	37187588	37191163	3576	-	HAVANA	gene	NA	NA
ENSMUSG00000016477.17	protein_coding	E2f3	4.36711	3.46813	3.67737	5.98333	5.26052	5.43423	4.83111	5.27058	5.43355	5.91512	5.61368	6.05198	5.49967	4.7716	4.84836	4.93443	5.91841	5.84177	5.89065	2.95306	3.3615	5.68234	5.57066	5.38333	5.35149	5.55963	5.45867	4.70991	4.34782	4.05401	4.00096	4.02858	5.71327	5.70253	5.78994	chr13	29906575	29985668	79094	-	HAVANA	gene	NA	NA
ENSMUSG00000016481.15	protein_coding	Cr1l	6.67194	6.87716	6.86755	6.33285	6.60719	6.1564	6.47177	6.55404	6.44813	6.24164	6.2453	6.29389	6.34148	6.58472	6.64779	6.69662	6.32442	6.25144	6.36243	6.8079	6.88514	6.46499	6.60125	6.48227	6.29598	6.48975	6.12907	6.49031	6.55057	6.79716	6.77332	6.79753	6.28526	6.33288	6.34566	chr1	195097382	195131586	34205	-	HAVANA	gene	NA	NA
ENSMUSG00000016493.13	protein_coding	Cd46	3.68163	4.00631	4.00441	3.536	4.14889	2.5034	3.43922	3.8706	3.39158	3.30208	2.93012	2.33279	3.34845	3.90776	4.00633	4.08908	2.35972	2.33664	2.47872	4.41413	4.33594	3.24308	3.19573	3.48505	3.58437	3.44219	2.44506	3.33609	3.75628	4.38985	4.37256	3.92535	2.37745	2.72019	2.44838	chr1	195036826	195092249	55424	-	HAVANA	gene	NA	NA
ENSMUSG00000016495.12	protein_coding	Plgrkt	6.00959	6.36707	6.41598	5.11267	5.26398	5.6374	5.8314	5.93512	5.68082	5.28301	5.98467	5.63485	6.04501	5.41499	5.55755	5.67999	5.54883	5.55997	5.42083	5.91192	6.22815	5.67322	5.86439	5.30694	5.15213	5.21872	5.61065	6.10746	6.23751	5.58664	5.40442	5.67864	5.43112	5.59982	5.48182	chr19	29348599	29367390	18792	-	HAVANA	gene	NA	NA
ENSMUSG00000016496.7	protein_coding	Cd274	5.71751	5.16754	4.97859	6.7718	7.54448	4.87287	5.46988	7.27354	7.25342	7.08834	6.18108	6.09536	5.82877	6.6749	7.12416	6.95955	5.98865	6.16552	5.89711	5.44572	5.71528	6.68709	6.61579	7.03977	7.44444	6.96917	4.86291	5.26426	5.13936	6.86104	6.38747	7.20648	6.20036	6.31763	6.23659	chr19	29367455	29388095	20641	+	HAVANA	gene	NA	NA
ENSMUSG00000016503.16	protein_coding	Gtf3a	5.25486	5.16035	5.17271	5.40912	5.12236	5.72641	5.37513	5.25632	5.37351	5.31931	5.83	6.12311	5.62574	4.98668	5.01809	5.12117	5.68562	5.79495	5.78589	4.50129	4.55041	5.51891	5.44865	5.18842	4.98228	5.36287	5.84004	5.34994	5.25626	4.74245	4.8752	4.67768	5.81519	5.63127	5.68765	chr5	146948657	146955614	6958	+	HAVANA	gene	NA	NA
ENSMUSG00000016510.11	protein_coding	Mtif3	4.5041	4.96429	4.7747	4.00953	4.22536	4.02142	4.41065	4.26485	4.05899	3.83437	4.10559	4.02707	3.97057	4.24666	3.94726	4.27422	3.75911	4.06784	3.98177	4.42553	4.63177	3.81881	4.07114	4.30894	3.84578	4.17129	4.06325	4.31692	4.25818	4.15045	4.38081	4.34153	4.0366	4.18863	4.22366	chr5	146951573	146963800	12228	-	HAVANA	gene	NA	NA
ENSMUSG00000016520.7	protein_coding	Lnx2	5.0658	4.96053	5.03908	5.0653	5.16371	4.92283	5.25025	5.12896	5.08656	5.04331	5.33523	5.50491	5.22747	5.10333	5.13972	5.14691	5.1338	5.17801	5.12974	5.07913	5.08864	5.16136	5.25502	5.11363	4.98216	5.0994	4.92066	5.06966	5.04134	5.08794	5.04656	5.2092	5.14756	5.24243	5.11284	chr5	147016655	147076586	59932	-	HAVANA	gene	NA	NA
ENSMUSG00000016528.10	protein_coding	Mapkapk2	6.32509	6.13297	6.16001	6.58557	6.42889	6.72439	6.38079	6.32415	6.5601	6.71625	6.90302	7.27251	6.93086	6.05772	6.06678	5.92466	6.6768	6.94388	6.92289	5.77464	5.67298	6.94957	6.8163	6.62138	6.71454	6.57766	6.77326	6.41959	6.066	5.92541	5.85078	5.94905	6.84252	6.8952	6.85018	chr1	131053700	131097826	44127	-	HAVANA	gene	NA	NA
ENSMUSG00000016534.15	protein_coding	Lamp2	5.71416	5.49953	5.64271	5.5591	5.91982	5.791	6.28369	5.85113	5.86031	5.86482	6.03522	5.9752	6.09335	5.89854	6.00957	5.7393	5.78961	5.69828	5.69397	5.77464	5.74983	6.05026	5.84396	5.64	5.87934	5.54198	5.89943	6.15548	6.16527	5.77528	5.7907	5.8441	5.71883	5.6193	5.91909	chrX	38401357	38456454	55098	-	HAVANA	gene	NA	NA
ENSMUSG00000016541.9	protein_coding	Atxn10	5.69116	5.32416	5.38561	6.24574	6.06984	6.21438	6.07185	5.83524	5.99675	6.1013	5.91224	6.12251	5.97238	5.97681	6.07757	5.9398	6.1319	6.17161	6.15577	5.64795	5.50269	5.96566	5.9395	6.22449	6.03236	6.10856	6.26905	6.13402	5.84665	5.91066	5.95091	5.91491	6.17023	6.15365	6.1109	chr15	85336381	85463836	127456	+	ENSEMBL	gene	NA	NA
ENSMUSG00000016552.13	protein_coding	Foxred2	3.77877	3.83894	3.89337	4.27674	4.16743	3.36885	2.98475	4.06063	4.17546	4.31317	3.90921	3.65389	3.70693	3.87034	3.72415	3.95592	3.56575	3.6405	3.47399	3.52867	3.53609	3.18256	3.21864	4.12114	4.21218	4.10884	3.38356	3.17952	3.20345	3.67944	3.49857	3.52868	3.59049	3.7612	3.54324	chr15	77940522	77956722	16201	-	HAVANA	gene	NA	NA
ENSMUSG00000016554.8	protein_coding	Eif3d	7.08594	6.94758	6.98311	7.55336	7.35969	7.2223	7.02146	7.2417	7.47323	7.56676	7.33685	7.63274	7.19044	6.94019	7.15167	7.02861	7.31571	7.51039	7.42441	6.28114	6.39967	7.28574	7.24031	7.35302	7.44946	7.46199	7.25058	7.08206	6.95143	6.84535	6.81032	6.85064	7.5022	7.51652	7.35922	chr15	77958998	77970824	11827	-	ENSEMBL	gene	NA	NA
ENSMUSG00000016559.14	protein_coding	H3f3b	8.61054	8.96981	8.62542	8.30339	8.19578	8.8034	8.3215	8.24153	8.43267	8.63723	8.65489	8.95379	8.59066	8.12631	8.64859	8.11149	8.72885	8.73357	8.7769	7.99337	7.87648	8.72106	8.58751	8.25523	8.59421	8.28455	8.88838	8.23494	8.22483	7.92795	7.88984	8.03684	8.6237	8.53248	8.61918	chr11	116021912	116027962	6051	-	HAVANA	gene	NA	NA
ENSMUSG00000016619.9	protein_coding	Nup50	6.62813	6.24668	6.32771	7.0689	6.82098	7.3833	7.07197	6.87625	7.01435	6.99237	7.18518	7.41466	7.00383	6.66983	6.72839	6.66118	7.21147	7.19967	7.30382	6.37587	6.46809	7.10456	7.10048	6.87892	6.94201	6.9106	7.42347	6.98357	6.94621	6.52009	6.61239	6.515	7.20639	7.15271	7.26377	chr15	84923428	84942955	19528	+	ENSEMBL	gene	NA	NA
ENSMUSG00000016664.14	protein_coding	Pacsin2	5.16223	5.1734	5.21204	5.43473	5.04792	5.45984	4.84688	4.78598	5.05021	5.12436	5.56726	5.99867	5.14901	4.7388	4.84377	4.77956	5.66126	5.71818	5.79022	4.34234	4.45822	5.70339	5.6002	5.1972	5.03885	5.27404	5.50834	4.39868	4.43548	4.55459	4.56275	4.50179	5.70209	5.49527	5.44552	chr15	83375607	83464606	89000	-	ENSEMBL	gene	NA	NA
ENSMUSG00000016756.16	protein_coding	Cmah	8.40124	8.15162	8.28972	8.18023	8.67868	8.80618	9.06927	8.77752	8.53537	8.18611	8.30583	7.5701	8.5881	9.01431	8.91445	9.09165	7.85657	7.6868	7.80272	9.43519	9.54668	8.23739	8.28964	8.43501	8.40081	8.44455	8.70684	9.32723	9.55658	9.20533	9.16978	9.24993	7.80843	7.8588	7.88165	chr13	24327420	24477285	149866	+	HAVANA	gene	NA	NA
ENSMUSG00000016757.10	protein_coding	Ttll12	5.32835	5.08392	5.07253	5.41658	5.26744	6.159	6.06062	5.20369	5.39326	5.39845	5.99462	6.11219	5.82877	5.19284	5.16384	5.13944	5.99176	5.89337	5.91539	5.05686	5.11742	5.75039	5.7149	5.36345	5.47824	5.43864	6.33031	5.8203	5.78494	4.98708	4.99678	5.06815	5.89125	5.86286	5.71822	chr15	83575119	83595157	20039	-	HAVANA	gene	NA	NA
ENSMUSG00000016831.11	protein_coding	Tox4	7.03738	6.8802	6.90142	7.10699	7.28793	7.245	7.25535	7.22119	7.21293	7.12089	7.15023	7.28116	7.18854	7.15365	7.12833	7.15047	7.18273	7.26178	7.24929	6.92387	6.92878	7.14426	7.13784	7.16573	7.16851	7.1476	7.29754	7.19674	7.23955	7.21589	7.23774	7.17164	7.23166	7.24541	7.2372	chr14	52279146	52296391	17246	+	HAVANA	gene	NA	NA
ENSMUSG00000016833.14	protein_coding	Mrps18c	4.01358	3.75054	3.58513	4.55564	4.14506	4.83639	4.30795	4.2126	4.4149	4.66468	4.59202	4.79294	4.59692	4.23004	4.37572	4.24317	4.59749	4.82673	4.66061	3.18976	3.41162	4.5345	4.41088	4.37164	4.34159	4.58518	4.75157	4.31815	4.28329	3.81979	3.67316	3.9988	4.67921	4.55135	4.52531	chr5	100798627	100804471	5845	+	HAVANA	gene	NA	NA
ENSMUSG00000016921.14	protein_coding	Srsf6	8.29578	8.23301	8.27277	8.63591	8.5316	7.96911	7.65996	8.48509	8.53768	8.73479	8.33759	8.45395	8.07627	8.44227	8.53848	8.44056	8.45756	8.4675	8.44807	8.16685	8.33709	8.3787	8.29039	8.54617	8.60702	8.51061	8.10729	7.73764	7.59251	8.32323	8.35549	8.41166	8.42713	8.37565	8.45354	chr2	162931528	162937121	5594	+	HAVANA	gene	NA	NA
ENSMUSG00000016933.17	protein_coding	Plcg1	7.9139	7.87768	7.84589	7.74165	7.83972	8.07921	8.25877	8.00135	7.87338	7.66794	7.90416	7.61866	7.80719	8.06025	8.06638	8.09577	7.81873	7.75301	7.71863	8.55949	8.41323	7.78346	7.86468	7.8438	7.86048	7.77883	7.9067	8.41317	8.54965	8.09622	8.14763	8.06928	7.82192	7.79694	7.70218	chr2	160731300	160775760	44461	+	HAVANA	gene	NA	NA
ENSMUSG00000016940.18	protein_coding	Kctd2	4.98607	5.2595	5.10639	4.42456	4.64755	4.5621	4.81516	4.9923	5.02684	4.50571	4.59243	4.37602	4.65888	4.93496	4.83224	4.94947	4.65738	4.56974	4.38643	5.57496	5.63226	4.68896	4.95698	4.68887	4.76816	4.61924	4.60036	4.82383	4.97353	4.99109	5.03674	5.06336	4.72414	4.68938	4.49076	chr11	115420128	115431274	11147	+	HAVANA	gene	NA	NA
ENSMUSG00000016946.5	protein_coding	Kctd5	4.418	4.36298	4.38013	4.64016	4.2812	4.65863	4.33803	4.32982	4.3182	4.14151	4.78991	5.05897	4.39952	4.17417	4.1491	4.2161	4.8887	4.90021	4.8659	4.01284	4.06961	4.76341	4.5809	4.47183	4.39005	4.52286	4.6391	4.4018	4.31395	4.12146	3.95998	4.18663	4.88611	4.77623	4.61579	chr17	24047734	24073485	25752	-	HAVANA	gene	NA	NA
ENSMUSG00000016984.7	protein_coding	Etaa1	4.95295	4.45086	4.64379	5.504	5.54369	5.49604	5.42154	5.29949	5.3485	5.62751	5.41944	5.45049	5.51057	5.29978	5.23563	5.31393	5.46918	5.35441	5.46989	5.11788	5.10104	5.34864	5.11538	5.47168	5.23015	5.46193	5.56846	5.15179	5.10214	5.16456	5.29745	5.21784	5.48759	5.33346	5.54035	chr11	17938756	17953875	15120	-	HAVANA	gene	NA	NA
ENSMUSG00000017119.19	protein_coding	Nbr1	6.71119	7.00493	7.05139	6.06018	6.40084	6.63043	6.77359	6.37548	6.28156	5.96561	6.11807	5.99262	6.62289	6.49917	6.39695	6.48586	6.06353	6.09114	6.15193	6.92317	6.84207	6.25765	6.39973	6.17973	6.1106	6.24488	6.58766	7.05332	7.07969	6.61024	6.75247	6.68515	5.91808	6.07522	5.9859	chr11	101552149	101581951	29803	+	HAVANA	gene	NA	NA
ENSMUSG00000017132.17	protein_coding	Cyth1	7.44446	7.55582	7.54156	7.08738	7.39927	7.18519	7.21659	7.71891	7.47835	7.19078	7.25656	6.87007	7.06263	7.4367	7.39928	7.52904	7.41105	7.34017	7.02111	7.70839	7.70967	7.27396	7.34253	7.42879	7.28204	7.28212	7.14841	7.39861	7.42571	7.53868	7.44166	7.46973	7.28064	7.31167	7.24189	chr11	118132019	118248592	116574	-	HAVANA	gene	NA	NA
ENSMUSG00000017146.12	protein_coding	Brca1	5.40867	4.41007	4.63742	6.67178	5.93076	7.26038	7.03573	6.22431	6.54228	6.58957	6.73699	7.0275	7.06387	5.78531	5.90005	6.09856	6.96454	6.94477	6.94218	4.04838	4.24751	6.57297	6.50499	6.21599	6.29132	6.48833	7.3108	6.90644	6.52118	4.78929	4.70595	4.63037	6.75458	6.89862	6.78994	chr11	101488764	101551955	63192	-	HAVANA	gene	NA	NA
ENSMUSG00000017176.17	protein_coding	Nt5c3b	5.27714	5.02246	5.01579	5.59055	5.33157	5.56556	5.43204	5.62711	5.6438	5.63671	5.80127	5.82479	5.60271	5.41309	5.48778	5.45095	5.69704	5.81769	5.72643	5.27922	5.20531	5.6132	5.59357	5.53909	5.51866	5.50461	5.84176	5.25358	5.19401	5.18921	5.42659	5.07187	5.93967	5.67354	5.63203	chr11	100422321	100441808	19488	-	HAVANA	gene	NA	NA
ENSMUSG00000017188.3	protein_coding	Coa3	4.19879	4.2961	4.23688	4.16228	4.361	4.37439	4.05081	3.82341	4.12715	4.05265	4.32039	4.52711	3.89987	4.02798	3.99214	4.06648	4.46475	4.49397	4.44549	3.4549	3.54821	4.32759	4.09177	4.23322	4.21218	4.14167	4.49447	3.96794	3.90001	3.9424	3.58197	3.60972	4.59705	4.57434	4.3275	chr11	101277968	101279114	1147	-	HAVANA	gene	NA	NA
ENSMUSG00000017210.14	protein_coding	Med24	5.65737	5.76038	5.64032	5.57447	5.42735	5.9124	5.95542	5.55375	5.71219	5.73355	5.59871	5.68607	5.65296	5.62701	5.57288	5.4087	5.71247	5.7693	5.76625	5.15096	5.05503	5.56126	5.49274	5.62979	5.74132	5.54743	6.05556	5.95833	5.95061	5.35718	5.2892	5.40734	5.67087	5.63579	5.49372	chr11	98704591	98729435	24845	-	HAVANA	gene	NA	NA
ENSMUSG00000017221.14	protein_coding	Psmd3	6.30473	5.8924	5.86699	6.94603	6.85354	6.76604	6.31805	6.61336	6.85135	6.88956	6.97127	7.26249	6.7464	6.55676	6.51272	6.40634	7.18316	7.26701	7.15945	5.96337	5.96754	6.99133	7.01808	6.85776	6.94201	6.74306	6.96996	6.2539	5.9983	6.22535	6.29781	6.42269	7.16626	7.20705	7.02434	chr11	98682554	98695979	13426	+	HAVANA	gene	NA	NA
ENSMUSG00000017264.16	protein_coding	Exosc10	6.2882	6.11481	6.04429	6.73955	6.61263	6.39262	6.09405	6.57671	6.75634	6.78629	6.65444	6.853	6.40193	6.32963	6.41252	6.35402	6.71434	6.83341	6.66863	5.92016	5.91933	6.59567	6.76071	6.59343	6.60842	6.69411	6.41311	6.0843	5.9594	6.22194	6.32227	6.24804	6.77207	6.84408	6.76192	chr4	148558429	148582401	23973	+	HAVANA	gene	NA	NA
ENSMUSG00000017286.15	protein_coding	Glod4	4.95124	5.05247	5.13544	4.73377	4.22544	5.39207	4.95272	4.79654	4.80391	5.00217	4.86734	5.45342	4.8495	4.64641	4.9389	5.27394	5.30447	5.27725	5.23892	3.49961	4.49741	4.76608	4.83455	4.53342	4.65666	4.68658	5.14656	5.17748	4.8401	4.3807	4.03835	4.1778	5.04731	5.27904	4.55463	chr11	76120987	76243725	122739	-	HAVANA	gene	NA	NA
ENSMUSG00000017288.15	protein_coding	Vps53	5.2342	4.81565	4.86724	5.77872	5.76709	5.6299	5.56514	5.66958	5.7614	5.779	5.72083	5.82865	5.61978	5.65553	5.62994	5.54223	5.57949	5.60432	5.50893	5.36142	5.32376	5.57981	5.59164	5.67142	5.79365	5.75526	5.66923	5.60258	5.67049	5.4417	5.6375	5.54421	5.48433	5.65748	5.6374	chr11	76046226	76179647	133422	-	HAVANA	gene	NA	NA
ENSMUSG00000017291.13	protein_coding	Taok1	7.78097	7.8655	7.92922	7.45745	7.73561	7.40982	7.5243	7.74138	7.60021	7.6431	7.7493	7.53596	7.88563	7.79341	7.63749	7.7864	7.54774	7.43592	7.51774	8.00723	8.01968	7.61469	7.59507	7.59796	7.56585	7.58657	7.37456	7.61201	7.77347	8.02752	7.97844	7.98904	7.45485	7.39628	7.67184	chr11	77529162	77607815	78654	-	HAVANA	gene	NA	NA
ENSMUSG00000017299.13	protein_coding	Dnttip1	3.9058	3.68059	3.75302	4.06295	4.22544	4.35317	4.24585	3.98807	4.1524	4.2092	4.17453	4.22184	4.31635	4.04149	4.08057	3.99786	4.16636	4.11169	4.12572	4.06831	3.95074	4.05531	4.15215	4.02299	4.01565	4.02125	4.48063	4.14626	4.2102	3.72834	3.72336	3.83991	4.04175	4.24237	3.86057	chr2	164745983	164768607	22625	+	HAVANA	gene	NA	NA
ENSMUSG00000017307.15	protein_coding	Acot8	3.71272	3.88711	3.90552	3.17101	3.36039	3.86883	3.86025	3.55511	3.37887	3.23028	3.71874	3.61716	3.64824	3.70894	3.20635	3.41328	3.64718	3.52847	3.58924	3.65296	3.15692	3.48654	3.62602	3.46866	3.35915	3.41327	3.58781	3.44422	3.79574	3.66816	3.64822	3.51233	3.60809	3.49802	3.5033	chr2	164792768	164804882	12115	-	HAVANA	gene	NA	NA
ENSMUSG00000017376.15	protein_coding	Nlk	6.35246	6.33518	6.38353	6.17551	6.50843	6.02056	6.44783	6.58064	6.38682	6.28504	6.30925	5.87825	6.12128	6.77334	6.59281	6.64872	5.89644	5.69511	5.77629	7.00815	6.99943	5.93293	5.96999	6.36721	6.40782	6.27314	6.06223	6.55491	6.85671	6.96772	6.8774	6.85268	5.91324	5.97294	5.94532	chr11	78567168	78697373	130206	-	HAVANA	gene	NA	NA
ENSMUSG00000017386.10	protein_coding	Traf4	4.88763	4.53976	4.80319	5.34799	5.26744	4.92487	4.80443	5.09638	5.30801	5.4937	5.31826	5.27225	4.93729	4.92285	4.97959	4.86135	5.45422	5.20944	5.22515	4.93464	4.78983	5.19006	4.95698	5.35883	5.4634	5.32891	4.89528	4.5917	4.58781	4.95457	4.66191	5.0343	5.33302	5.55717	5.25943	chr11	78158499	78165589	7091	-	HAVANA	gene	NA	NA
ENSMUSG00000017404.12	protein_coding	Rpl19	9.97353	10.2058	10.2247	9.73934	9.60606	9.81567	9.74895	9.84152	9.82861	9.8146	9.80936	9.81564	9.91423	9.70696	9.84491	9.87346	9.63333	9.81666	9.79224	9.53241	9.65651	9.61658	9.72177	9.60279	9.54078	9.78064	9.83558	9.89904	9.87137	9.53513	9.61596	9.58011	9.6534	9.71539	9.65786	chr11	98026710	98030492	3783	+	HAVANA	gene	NA	NA
ENSMUSG00000017405.14	protein_coding	Nek8	3.47582	3.49647	3.41208	3.63508	3.80804	3.57558	3.64449	3.73749	3.71036	3.75197	3.48741	3.54003	3.71113	3.50461	3.65252	3.43347	3.52623	3.4177	3.31233	3.09581	2.9508	3.08204	3.18655	3.65181	3.96314	3.48102	3.79844	3.66905	3.55618	3.6185	3.58197	3.31973	3.17106	3.22056	3.12055	chr11	78166106	78176675	10570	-	HAVANA	gene	NA	NA
ENSMUSG00000017418.13	protein_coding	Arl5b	5.30446	5.10962	5.27398	5.581	5.99678	4.9391	5.27767	5.61527	5.46458	5.30685	5.15043	5.13624	5.12241	5.80393	5.54771	5.78073	5.05267	4.95598	5.07061	5.84563	5.94019	5.32684	5.04553	5.64127	5.31339	5.53787	4.83203	5.34606	5.42923	6.08598	5.74016	6.00755	5.17614	5.005	5.2733	chr2	15049395	15082456	33062	+	HAVANA	gene	NA	NA
ENSMUSG00000017421.18	protein_coding	Zfp207	8.13832	8.05412	8.16786	8.12092	8.16924	8.26842	8.25705	8.06797	8.07056	8.14082	8.24558	8.26511	8.12871	8.16772	7.96087	8.18095	8.25075	8.153	8.22018	8.09885	8.19534	8.24287	8.19582	8.09225	7.95272	8.11562	8.26939	8.28532	8.33828	8.15325	8.09953	8.21577	8.1087	8.0323	8.23703	chr11	80383279	80405733	22455	+	HAVANA	gene	NA	NA
ENSMUSG00000017428.16	protein_coding	Psmd11	6.11414	5.30033	5.36183	7.20888	7.12037	6.78393	6.47073	6.78664	6.99778	7.13467	6.97005	7.31169	6.67426	6.7147	6.79033	6.794	7.16705	7.24049	7.21686	6.27772	6.32557	7.11347	7.09982	7.08293	7.15815	7.06443	7.00521	6.33627	6.2965	6.62329	6.73302	6.5977	7.24464	7.17782	7.19154	chr11	80428615	80473248	44634	+	HAVANA	gene	NA	NA
ENSMUSG00000017466.9	protein_coding	Timp2	4.54766	4.99065	4.8563	3.62247	4.26746	3.31375	3.47891	4.72233	4.61593	4.39885	4.161	3.43181	4.61016	5.37286	5.29564	5.11868	4.02868	3.32782	2.80116	5.44	5.04864	3.06355	3.0996	4.4459	4.29271	3.8902	3.52818	3.63758	3.31724	5.29037	5.55305	5.20486	3.5158	4.10701	3.49669	chr11	118301069	118355740	54672	-	HAVANA	gene	NA	NA
ENSMUSG00000017478.15	protein_coding	Zc3h18	6.68109	6.41772	6.43587	7.17133	6.90547	6.75573	6.35343	6.87898	7.00838	7.00015	7.00798	7.20311	6.74124	6.89306	7.03189	6.94245	7.24663	7.27974	7.26656	6.73263	6.58454	7.14579	7.2234	7.07497	7.13169	7.10112	6.86926	6.42497	6.25188	6.63482	6.80259	6.75952	7.18445	7.16221	7.16212	chr8	122376609	122417360	40752	+	HAVANA	gene	NA	NA
ENSMUSG00000017485.10	protein_coding	Top2b	8.72501	8.8267	8.91941	8.41307	8.44956	8.97663	8.92842	8.36551	8.40841	8.56262	8.40212	8.44069	8.63895	8.61093	8.58131	8.64937	8.62961	8.49145	8.57164	8.37616	8.58829	8.42546	8.3188	8.38261	8.34142	8.42949	8.91112	9.07696	9.12656	8.56279	8.65615	8.58661	8.54607	8.44708	8.56734	chr14	16365179	16430787	65609	+	HAVANA	gene	NA	NA
ENSMUSG00000017493.12	protein_coding	Igfbp4	7.09037	7.22198	7.03693	7.84748	8.09533	6.79316	5.99371	8.09512	7.98862	7.86761	7.54914	7.12827	7.09519	7.94558	7.50147	7.02592	7.72995	7.3422	6.60754	6.15142	5.06562	5.10672	5.09651	8.60904	8.49316	7.77766	6.67911	6.29903	5.60477	7.17593	7.24992	7.10064	6.80381	7.16412	6.65737	chr11	99041244	99054392	13149	+	HAVANA	gene	NA	NA
ENSMUSG00000017499.15	protein_coding	Cdc6	5.01572	4.08475	4.44828	6.53318	5.79609	6.51506	5.83404	5.85206	6.15793	6.32791	6.32085	6.80303	6.19296	5.38704	5.52782	5.6395	6.63162	6.65792	6.67829	2.24868	3.38874	6.31544	6.14553	6.13714	6.12429	6.34066	6.63826	5.58068	5.19065	3.90035	4.0506	3.94776	6.54049	6.54996	6.52304	chr11	98907801	98923940	16140	+	HAVANA	gene	NA	NA
ENSMUSG00000017548.15	protein_coding	Suz12	7.34058	6.75807	6.80739	8.15581	7.88944	8.16318	7.71658	7.98727	8.07069	8.36533	8.08541	8.38757	8.07466	7.56875	7.75689	7.74175	8.36242	8.29292	8.3548	6.79525	7.05029	8.12631	7.96696	7.91923	7.90607	7.99443	8.25768	7.63888	7.43333	7.36777	7.27517	7.39565	8.23017	8.12445	8.29469	chr11	79993106	80034123	41018	+	HAVANA	gene	NA	NA
ENSMUSG00000017550.14	protein_coding	Atad5	5.70301	4.86356	5.00606	6.95737	6.37064	7.16327	6.71749	6.4868	6.62517	6.94378	6.83181	7.19412	7.0064	6.01498	6.16198	6.29553	7.14406	7.16153	7.15021	4.03832	4.49628	6.76449	6.6206	6.51729	6.51879	6.68918	7.25701	6.64671	6.18133	5.39098	5.24724	5.19614	7.12811	7.0416	7.11957	chr11	80089400	80135794	46395	+	HAVANA	gene	NA	NA
ENSMUSG00000017561.16	protein_coding	Crlf3	7.80424	7.93465	8.02258	7.39086	7.56358	7.58682	7.61307	7.58945	7.44374	7.20036	7.46495	7.14667	7.22589	7.8008	7.63324	7.84617	7.4799	7.42772	7.39099	8.4695	8.55468	7.56763	7.72057	7.459	7.34184	7.49219	7.53381	7.88788	8.02161	8.04307	8.06069	8.08133	7.34498	7.41479	7.35791	chr11	80046493	80080991	34499	-	HAVANA	gene	NA	NA
ENSMUSG00000017615.12	protein_coding	Tnfaip1	4.45926	4.38672	4.25364	5.1306	4.82218	4.2721	4.06886	4.62345	4.75629	4.74263	4.7471	4.72351	4.29689	4.42157	4.4799	4.60603	4.63101	4.74952	4.53806	4.75266	4.62783	4.66054	4.74194	4.9304	4.90619	4.91129	4.40738	3.9381	3.96692	4.46511	4.44146	4.58432	4.62694	4.79103	4.78511	chr11	78522850	78536332	13483	-	HAVANA	gene	NA	NA
ENSMUSG00000017631.18	protein_coding	Abr	6.71816	6.57988	6.58494	6.28162	6.33156	7.25063	7.23967	6.69903	6.73994	6.33372	7.47537	7.43869	7.23542	6.4255	6.53138	6.57514	7.1681	7.06665	7.07983	6.74197	6.72874	7.29492	7.38664	6.34789	6.49387	6.37787	7.21061	7.09736	7.29899	6.50474	6.52728	6.52199	6.98431	6.99123	6.94423	chr11	76416734	76622314	205581	-	HAVANA	gene	NA	NA
ENSMUSG00000017639.13	protein_coding	Rab11fip4	5.92193	6.42226	6.42529	5.44312	5.2325	5.95604	5.80204	5.46903	5.36504	5.30092	5.75904	5.59092	5.62425	5.59071	5.41641	5.32386	4.9793	5.03664	5.03427	6.21871	5.98103	5.03261	4.87275	5.36345	5.43496	5.42833	5.68042	5.47631	5.77252	5.5326	5.69405	5.57145	4.83582	4.86749	4.75577	chr11	79591212	79698023	106812	+	HAVANA	gene	NA	NA
ENSMUSG00000017664.16	protein_coding	Slc35c2	4.406	4.88991	4.81877	4.16228	3.94381	3.59111	3.50565	3.78109	4.01983	4.07712	4.29585	4.46856	3.63789	3.8804	3.87564	3.84081	4.1636	4.41657	4.37327	3.57118	3.91896	4.23699	4.16278	4.01929	4.1185	4.17728	3.69926	3.37669	3.29658	3.74744	3.82955	3.81734	4.21173	4.28481	4.14338	chr2	165276554	165287869	11316	-	HAVANA	gene	NA	NA
ENSMUSG00000017670.16	protein_coding	Elmo2	5.8624	5.50237	5.47053	5.98086	5.98003	6.3346	6.11374	6.18501	6.1991	6.00439	6.89078	7.32468	6.38952	5.79996	5.8529	5.98324	6.78362	6.86007	7.03037	5.47027	5.60639	7.02676	7.0492	5.90618	5.98005	5.96821	6.23909	5.85492	5.80581	5.70862	5.504	5.82725	6.72863	6.60124	6.6374	chr2	165288031	165326479	38449	-	HAVANA	gene	NA	NA
ENSMUSG00000017677.11	protein_coding	Wsb1	6.00631	5.9936	6.12394	6.03025	6.0358	5.84598	5.6243	6.01946	6.19417	6.09018	6.06094	6.37384	5.77654	5.9182	5.75002	5.92791	6.06943	5.89705	6.06699	5.88969	5.91583	6.13092	5.96148	6.05563	5.90518	6.07308	5.79807	5.56403	5.60337	5.97082	5.88676	6.17225	5.93967	5.91333	6.06179	chr11	79239372	79254671	15300	-	HAVANA	gene	NA	NA
ENSMUSG00000017679.16	protein_coding	Ttpal	6.75338	6.95589	6.8973	6.68296	6.6816	6.65342	6.75559	6.34543	6.38358	6.3913	6.40875	6.46464	6.63235	6.62566	6.43404	6.59918	6.55933	6.49013	6.43835	6.68503	6.60864	6.50094	6.31023	6.69234	6.52833	6.58099	6.74572	6.94391	6.89959	6.57993	6.63372	6.61327	6.55766	6.611	6.52739	chr2	163602314	163619013	16700	+	HAVANA	gene	NA	NA
ENSMUSG00000017686.16	protein_coding	Rhot1	5.71063	5.70278	5.71259	5.82992	5.8151	5.7032	5.4528	5.64131	5.66131	5.81996	5.6929	5.90702	5.39373	5.75965	5.75857	5.62886	5.83653	5.77231	5.88138	5.5592	5.56521	5.81721	5.71939	5.73825	5.85555	5.77949	5.48443	5.26082	5.4434	5.78456	5.71882	5.79296	5.94205	5.85349	5.96468	chr11	80209019	80267907	58889	+	HAVANA	gene	NA	NA
ENSMUSG00000017707.9	protein_coding	Serinc3	8.56038	8.54672	8.71414	8.06626	7.75235	9.89189	9.64261	8.1583	8.21745	8.0092	8.70969	8.81821	9.49819	7.89623	7.94275	8.06342	8.68177	8.64013	8.81294	7.80691	7.79611	8.56276	8.46276	8.0024	7.85697	7.99607	9.73415	9.74896	9.76232	7.92429	7.81282	7.88774	8.51045	8.50544	8.51868	chr2	163623272	163645131	21860	-	HAVANA	gene	NA	NA
ENSMUSG00000017713.9	protein_coding	Tha1	3.72648	3.97022	3.59349	3.30436	3.67906	3.67129	3.97628	4.03741	3.76734	3.66153	3.33259	2.84279	4.45445	3.92404	3.77741	3.83984	3.17973	3.1541	3.24275	4.44464	4.21025	2.92019	3.34172	3.86255	3.30026	3.60399	3.77079	4.19414	4.1508	4.01371	4.03431	3.68421	3.27858	3.45988	3.36038	chr11	117867952	117873481	5530	-	HAVANA	gene	NA	NA
ENSMUSG00000017715.11	protein_coding	Pgs1	5.66012	5.60482	5.51176	5.65702	5.70213	5.79322	5.71011	5.76473	5.66563	5.67846	5.82649	5.79916	5.79804	5.70786	5.63901	5.5921	6.05857	6.0033	5.87481	5.67359	5.65668	5.87926	5.90503	5.82443	5.86809	5.69469	5.76687	5.76896	5.8215	5.71802	5.53562	5.58153	5.80498	5.87911	5.73331	chr11	117986292	118024011	37720	+	HAVANA	gene	NA	NA
ENSMUSG00000017716.15	protein_coding	Birc5	4.87996	3.76582	4.06468	5.93653	4.63155	7.58811	7.36728	5.77769	6.13882	5.72694	7.10019	7.25602	7.29654	4.3582	4.40715	5.01833	7.3174	7.22002	7.23671	2.13989	2.92312	6.89919	6.7861	5.27946	5.12306	5.80817	7.59684	7.18071	7.06602	3.12912	2.51036	2.82679	7.18847	7.1081	7.08655	chr11	117849251	117855743	6493	+	HAVANA	gene	NA	NA
ENSMUSG00000017718.15	protein_coding	Afmid	3.53811	3.8147	3.81192	2.82958	2.9214	3.75301	4.04171	3.28655	3.14371	2.86173	3.2383	3.54026	3.77257	3.11223	2.88222	3.36699	3.26013	3.35687	3.18738	3.30551	3.1993	3.21894	3.18095	2.92342	2.43875	3.00739	3.70594	3.81524	4.07174	2.75962	3.4181	2.92275	3.26633	3.26618	3.35868	chr11	117825924	117839908	13985	+	HAVANA	gene	NA	NA
ENSMUSG00000017721.15	protein_coding	Pigt	5.20771	4.57856	4.62929	5.88023	5.54307	5.93277	5.6723	5.68682	5.87805	5.82513	5.85959	6.06027	5.88005	5.76509	5.78872	5.67483	5.94005	6.13154	6.01873	5.4999	5.48545	5.84002	6.0789	5.85999	5.91601	5.75848	5.99809	5.63614	5.37599	5.64128	5.71575	5.78128	6.03636	5.98586	5.82097	chr2	164497520	164508301	10782	+	HAVANA	gene	NA	NA
ENSMUSG00000017756.8	protein_coding	Slc12a7	7.02655	7.06161	7.04056	6.63037	6.88986	6.59812	7.0517	7.26484	6.94637	6.31474	6.81074	6.02091	6.05745	7.54542	7.40474	7.45532	6.47659	6.16476	6.18621	8.81052	8.59012	6.95292	7.23445	6.74824	6.91076	6.81717	6.44845	7.25216	7.45475	7.8255	7.9368	7.80913	6.51355	6.60264	6.33908	chr13	73763697	73816743	53047	+	ENSEMBL	gene	NA	NA
ENSMUSG00000017760.15	protein_coding	Ctsa	6.47121	6.76464	6.8042	5.70836	5.96657	6.36936	6.76157	6.22491	6.16626	5.91263	6.09633	5.95962	6.22362	6.28794	6.32598	6.32322	5.88615	5.93294	5.85849	6.31941	6.41478	5.98488	6.05492	5.81178	5.82833	5.85728	6.28433	6.74964	6.92117	6.2629	6.32386	6.35509	5.99076	6.0215	5.87136	chr2	164832873	164841032	8160	+	HAVANA	gene	NA	NA
ENSMUSG00000017765.16	protein_coding	Slc12a4	4.13392	3.91291	3.92742	4.48132	4.57679	4.03867	3.88756	4.29994	4.62855	4.47429	4.64349	4.90741	4.07608	4.3175	4.3468	4.31185	4.43959	4.59249	4.77665	3.63791	3.67448	4.58254	4.63848	4.44555	4.45784	4.41947	4.21533	3.66905	3.82984	4.28727	4.32526	4.23852	4.78901	4.60777	4.50846	chr8	105943590	105966115	22526	-	HAVANA	gene	NA	NA
ENSMUSG00000017774.19	protein_coding	Myo1c	5.7789	6.23131	6.24263	5.53462	5.42426	5.76841	5.52321	5.309	5.36942	5.10069	5.39654	5.34458	5.34312	5.29226	5.49164	5.41799	5.50593	5.40053	5.5245	4.39062	4.39918	5.31517	4.92815	5.29891	5.27615	5.57439	5.89836	5.52155	5.48356	5.02671	5.29745	4.9118	5.36883	5.56293	5.26638	chr11	75650504	75673910	23407	+	HAVANA	gene	NA	NA
ENSMUSG00000017776.15	protein_coding	Crk	6.25232	6.22379	6.35953	6.10546	6.30994	6.11402	6.18579	6.21277	6.06381	5.74123	6.09264	6.11753	5.97938	6.39512	6.0218	6.32795	6.25617	6.21503	6.19296	6.492	6.52443	6.2728	6.15136	6.22872	5.92457	6.14319	6.1596	6.19656	6.22754	6.47066	6.50964	6.54622	6.16617	6.2514	6.21878	chr11	75679259	75706908	27650	+	HAVANA	gene	NA	NA
ENSMUSG00000017778.14	protein_coding	Cox7c	6.04356	5.89785	5.97913	6.30878	6.05834	6.52626	6.22124	6.19997	6.33399	6.49739	6.46426	6.60698	6.44373	5.97146	6.06492	6.0656	6.38547	6.45113	6.48206	5.25184	5.42318	6.24227	6.10843	6.05001	5.87935	6.11189	6.56514	6.12936	6.12526	5.70562	5.59343	5.64683	6.24382	6.32729	6.27109	chr13	86044816	86046904	2089	-	HAVANA	gene	NA	NA
ENSMUSG00000017781.17	protein_coding	Pitpna	7.07877	6.74808	6.71737	7.49488	7.44423	7.46741	7.26239	7.36331	7.45176	7.51053	7.42702	7.54376	7.33623	7.48324	7.53351	7.45193	7.58394	7.5593	7.55066	7.20212	7.17591	7.45599	7.54057	7.41326	7.45572	7.48616	7.47149	7.17432	7.17334	7.34614	7.45001	7.39548	7.51442	7.49906	7.3757	chr11	75588097	75628804	40708	+	HAVANA	gene	NA	NA
ENSMUSG00000017801.15	protein_coding	Mlx	5.12574	5.34927	5.27001	4.92739	4.9268	5.14707	4.88538	4.71816	4.81517	4.77119	5.17581	5.37707	4.91184	4.8218	4.72428	4.80103	5.18323	5.15698	5.25616	4.5297	4.8195	5.21367	4.99574	4.89769	4.87749	4.87394	5.19502	4.67677	4.65637	4.61528	4.86141	4.73625	5.18384	5.23057	5.17645	chr11	101087277	101092207	4931	+	HAVANA	gene	NA	NA
ENSMUSG00000017802.14	protein_coding	Fam134c	6.47074	6.67492	6.76676	5.91859	6.23779	6.2343	6.49531	6.10226	6.14138	5.82925	6.22074	5.9752	6.37633	6.45273	6.27447	6.28963	6.05463	5.97923	5.91084	6.81897	6.72541	6.04948	6.11516	6.15947	6.00644	5.96617	6.29516	6.52441	6.55057	6.48353	6.51319	6.57173	5.73539	6.07522	5.97745	chr11	101096322	101119893	23572	-	HAVANA	gene	NA	NA
ENSMUSG00000017830.15	protein_coding	Dhx58	3.73783	4.32288	4.25774	2.36196	2.49094	4.67081	4.89304	2.69016	2.87325	2.85374	3.48719	3.33636	4.31035	2.02994	2.54804	2.70068	3.28369	3.8638	4.48974	1.9596	2.56558	3.53526	3.19302	2.13682	2.21804	2.68748	4.64165	4.80242	4.93616	2.14433	1.87965	2.14647	3.84558	2.89493	3.46078	chr11	100694884	100704271	9388	-	HAVANA	gene	NA	NA
ENSMUSG00000017831.7	protein_coding	Rab5a	5.6193	5.63136	5.67684	5.60169	5.54207	5.62602	5.42425	5.60475	5.5742	5.79159	5.78147	5.88005	5.65864	5.4381	5.62444	5.40289	5.70108	5.54467	5.77173	5.39971	5.5975	5.64051	5.53516	5.52326	5.61262	5.53952	5.59013	5.61871	5.61423	5.41256	5.39542	5.64987	5.48073	5.44282	5.68353	chr17	53479234	53507671	28438	+	ENSEMBL	gene	NA	NA
ENSMUSG00000017837.12	protein_coding	Nkiras2	4.31329	4.547	4.36116	3.8616	3.86499	4.63502	4.43889	3.96869	4.16096	3.70686	4.24477	4.35712	4.49888	3.96556	4.07647	4.02363	4.2818	4.4078	4.34512	4.22967	4.24341	4.20843	4.23965	3.94049	4.0856	3.95979	4.63195	4.46701	4.5892	3.91131	3.80928	3.76569	4.22015	4.22141	4.15885	chr11	100619244	100627607	8364	+	HAVANA	gene	NA	NA
ENSMUSG00000017843.13	protein_coding	Ppp2r5c	7.41337	7.42332	7.44838	7.012	7.14596	7.82274	7.9287	7.32834	7.30033	7.09263	7.57971	7.50937	7.73858	7.24027	7.20865	7.23061	7.43182	7.33135	7.4027	7.42615	7.40242	7.25711	7.23876	7.08995	6.95149	7.06355	7.75777	8.02394	8.07869	7.30644	7.31027	7.29492	7.25312	7.37769	7.37249	chr12	110485739	110583061	97323	+	ENSEMBL	gene	NA	NA
ENSMUSG00000017858.12	protein_coding	Ift52	4.93724	4.76995	4.78312	4.98215	5.08756	5.37266	5.41451	4.92499	5.10506	4.90957	5.12975	5.14561	5.0345	5.19082	5.14159	5.05455	5.25792	5.13033	5.10128	4.79513	4.91218	5.04209	4.99454	5.16577	4.98447	4.92602	5.29524	5.35898	5.43712	5.0228	4.96606	4.87948	5.10573	5.17634	5.0895	chr2	163017354	163046141	28788	+	HAVANA	gene	NA	NA
ENSMUSG00000017861.11	protein_coding	Mybl2	4.21506	3.00329	3.33933	5.8078	4.74	6.12295	5.59968	5.07425	5.47579	5.69229	6.04336	6.5998	5.97151	4.6475	4.55198	4.75286	6.23268	6.38196	6.31296	2.51865	3.01338	5.89247	5.92303	5.33076	5.33347	5.45614	6.33582	5.55001	5.12576	3.24118	3.31576	3.11287	6.15596	6.02394	5.94532	chr2	163054687	163084688	30002	+	HAVANA	gene	NA	NA
ENSMUSG00000017897.18	protein_coding	Eya2	3.5375	3.80411	3.64913	2.70285	1.084	4.59842	3.95703	1.73537	2.00269	2.03798	3.84636	4.2997	3.6201	2.85925	3.10388	2.98551	4.33024	4.13726	4.34926	3.66577	3.80227	4.03985	4.01709	2.60105	2.30936	2.71759	4.58192	4.27798	4.61588	1.99248	2.81615	2.38003	3.86577	3.74102	4.07374	chr2	165595032	165771727	176696	+	HAVANA	gene	NA	NA
ENSMUSG00000017929.13	protein_coding	B4galt5	5.89667	5.41354	5.40918	6.43739	6.17478	6.63356	6.41646	6.43811	6.65103	6.28804	7.3133	7.78003	6.57753	5.81577	5.88451	5.91484	6.82318	6.90052	7.23671	4.94814	5.28261	7.14763	7.08707	6.0802	5.99273	6.11041	6.60863	5.76675	5.93509	5.57332	5.66246	5.61463	7.09749	6.98051	7.04975	chr2	167298444	167349183	50740	-	HAVANA	gene	NA	NA
ENSMUSG00000017999.16	protein_coding	Ddx27	6.26285	6.03604	6.05807	7.03915	6.57548	6.23347	5.78849	6.4862	6.64472	6.99145	6.54309	6.89945	6.33536	6.34606	6.45374	6.35644	6.81676	7.01887	6.86387	5.66604	5.81402	6.6906	6.75798	6.80092	6.88996	6.90317	6.35844	5.72368	5.48813	5.98698	6.07844	6.14984	6.95987	6.87219	6.78389	chr2	167015193	167034947	19755	+	HAVANA	gene	NA	NA
ENSMUSG00000018001.18	protein_coding	Cyth3	5.62727	5.98362	6.18478	4.9165	5.05993	4.54625	4.97681	5.70547	5.88575	5.495	4.91607	4.85313	5.68111	5.3888	5.47542	5.62217	4.33351	4.63734	4.48274	6.06975	6.05515	4.97936	5.0686	5.02297	5.08481	5.1105	4.30508	5.20644	5.24379	5.65904	5.71882	5.54765	4.84602	4.79593	4.7607	chr5	143622447	143710250	87804	+	HAVANA	gene	NA	NA
ENSMUSG00000018008.7	protein_coding	Cyth4	6.6784	7.24069	7.07162	5.80594	5.81274	6.35672	6.58112	6.25345	6.06381	5.53718	6.31353	6.296	6.03665	6.26102	6.17573	6.32136	6.13659	5.94051	6.09372	6.8241	6.55631	6.21849	6.17609	5.84795	5.84032	6.01718	6.46435	6.31404	6.64962	6.45477	6.52025	6.39247	6.05626	6.12473	5.97745	chr15	78597047	78622019	24973	+	ENSEMBL	gene	NA	NA
ENSMUSG00000018040.9	protein_coding	Rrp7a	6.01728	5.91762	5.93018	6.41416	6.05764	5.97734	5.61613	6.07367	6.29155	6.32775	6.20411	6.4898	5.87156	6.01851	6.1066	5.95085	6.32474	6.52978	6.36936	5.60516	5.59781	6.26191	6.36601	6.29313	6.3999	6.31392	5.94413	5.65688	5.55183	5.99881	5.84091	5.92402	6.38186	6.49356	6.28753	chr15	83113433	83122801	9369	-	HAVANA	gene	NA	NA
ENSMUSG00000018042.17	protein_coding	Cyb5r3	4.86177	5.04075	4.98488	4.97556	4.65812	4.99077	4.4661	4.68317	4.67372	4.86811	4.47051	4.96502	4.61241	4.76075	4.78037	4.69285	4.83887	5.02491	4.86966	4.4258	4.35498	4.71487	4.8606	4.8203	4.80785	4.88998	5.18784	4.46891	4.21097	4.45933	4.44146	4.57089	4.66776	4.87213	4.6587	chr15	83153494	83172592	19099	-	HAVANA	gene	NA	NA
ENSMUSG00000018068.13	protein_coding	Ints2	5.76972	5.55928	5.57094	6.23875	5.88576	6.15689	5.71733	5.93578	6.04347	6.28197	6.21051	6.25566	6.06644	5.84681	5.94804	5.91435	6.23687	6.23156	6.3227	4.99707	5.1907	6.13468	5.83062	6.19014	6.21742	6.11311	6.14248	5.61083	5.60095	5.66543	5.6661	5.69415	6.26457	6.27395	6.2937	chr11	86210681	86257575	46895	-	HAVANA	gene	NA	NA
ENSMUSG00000018076.12	protein_coding	Med13l	6.86684	6.66035	6.67405	6.88396	7.26137	6.67423	6.93725	7.26134	7.11099	7.04868	6.89977	6.52874	7.30003	7.47206	7.3508	7.2972	6.60544	6.44808	6.47579	8.01695	7.80941	6.82337	6.8794	7.15454	7.27072	7.01319	6.73025	7.28723	7.15289	7.55368	7.61088	7.57523	6.5623	6.62484	6.50698	chr5	118560679	118765438	204760	+	HAVANA	gene	NA	NA
ENSMUSG00000018102.4	protein_coding	Hist1h2bc	5.74416	5.31496	5.38786	6.54042	5.21439	7.41836	7.28612	6.10432	6.35723	6.18902	6.76185	7.12812	7.24966	5.01896	5.1038	5.37362	7.10019	7.27873	7.29766	3.46056	3.81628	6.83706	6.78765	6.07946	5.67434	6.33488	7.71003	7.14791	6.83657	3.80492	3.41568	3.85716	7.2372	7.03912	6.91971	chr13	23684199	23692488	8290	+	HAVANA	gene	NA	NA
ENSMUSG00000018143.10	protein_coding	Mafk	5.34718	5.38261	5.4366	5.48391	5.50511	4.80924	4.86233	5.34207	5.40875	5.45755	5.20509	5.56633	5.01732	5.38243	5.56802	5.13476	5.42324	5.52322	5.36182	5.2793	5.24447	5.18525	5.38996	5.46837	5.71186	5.27684	4.74446	4.89166	5.07347	5.31887	5.19018	5.44464	5.417	5.26702	5.15761	chr5	139791513	139802653	11141	+	HAVANA	gene	NA	NA
ENSMUSG00000018160.15	protein_coding	Med1	7.33515	6.98501	7.00056	7.7104	7.77195	7.63101	7.5292	7.65909	7.67931	7.63463	7.66028	7.72976	7.49623	7.61146	7.62524	7.65167	7.77219	7.84598	7.79138	7.45576	7.4737	7.76959	7.7887	7.67101	7.74354	7.69346	7.64014	7.48809	7.44383	7.70853	7.74508	7.69923	7.89509	7.82205	7.84264	chr11	98152154	98193293	41140	-	HAVANA	gene	NA	NA
ENSMUSG00000018167.10	protein_coding	Stard3	4.68147	5.06827	5.05231	4.21925	4.0679	4.48383	4.51299	4.23609	4.19533	3.96172	4.09709	4.21615	3.88877	4.52459	4.35007	4.31894	4.32367	4.20713	4.28604	4.70572	4.56056	4.23699	4.37701	4.31828	4.30015	4.19476	4.39234	4.44184	4.46356	4.17182	4.58314	4.33702	4.31079	4.35952	4.04168	chr11	98358368	98381112	22745	+	HAVANA	gene	NA	NA
ENSMUSG00000018168.8	protein_coding	Ikzf3	8.0244	7.86288	7.91571	8.07188	8.55052	8.18494	8.48834	8.27986	8.31161	8.2463	7.64918	7.5408	8.06871	8.27719	8.2571	8.20039	7.8414	7.82608	7.82706	8.27369	8.14931	8.10766	8.18834	8.14872	8.11602	8.01981	8.33005	8.7982	8.69097	8.36904	8.31798	8.3788	7.81753	7.90884	7.868	chr11	98464902	98546031	81130	-	HAVANA	gene	NA	NA
ENSMUSG00000018169.12	protein_coding	Mfng	5.68268	5.8015	5.83462	5.64165	5.45489	5.13196	5.06936	5.49307	5.48389	5.56339	5.61666	5.44417	5.3593	5.75965	5.60169	5.6087	5.49134	5.5342	5.36473	6.27767	6.10936	5.42788	5.5032	5.65642	5.58107	5.50321	4.98021	5.29989	5.32255	5.90854	5.92719	5.79584	5.52932	5.63305	5.43938	chr15	78755882	78773475	17594	-	HAVANA	gene	NA	NA
ENSMUSG00000018171.9	protein_coding	Vmp1	6.49872	6.33038	6.10213	6.55713	6.89322	6.91593	7.37093	7.06045	7.10903	6.79685	7.03309	7.27322	7.04399	6.5008	6.87103	6.79505	6.83247	6.87461	6.97785	5.53076	5.7642	6.93608	6.66554	6.60324	6.5812	6.82168	6.98558	6.90203	7.12679	6.44163	6.20001	6.57509	7.00608	6.89976	7.05277	chr11	86583865	86683836	99972	-	HAVANA	gene	NA	NA
ENSMUSG00000018189.12	protein_coding	Uchl5	4.94451	4.17323	4.20059	6.38607	5.96095	6.00615	5.6243	5.30764	5.63882	5.99525	5.88863	6.2953	5.58123	5.39408	5.50623	5.56752	6.25012	6.29813	6.36044	4.12173	4.36187	6.00415	5.77872	6.01112	5.76436	6.13688	6.10529	5.36219	5.12771	5.13585	4.95568	4.92242	6.19039	6.14791	6.28018	chr1	143777272	143807466	30195	+	HAVANA	gene	NA	NA
ENSMUSG00000018196.18	protein_coding	Glrx2	4.54242	4.50455	4.3888	4.47221	4.81747	4.36839	4.49308	4.78403	4.61961	4.57606	4.61045	4.48834	4.69332	4.94459	4.80418	4.81048	4.46475	4.43442	4.38905	4.73718	4.89329	4.38332	4.43006	4.7443	4.66533	4.78077	4.38931	4.65595	4.83948	4.95046	5.0169	4.80113	4.43083	4.42423	4.50846	chr1	143716338	143749676	33339	+	HAVANA	gene	NA	NA
ENSMUSG00000018199.8	protein_coding	Trove2	3.35848	3.59583	3.5542	3.23196	3.36749	3.36283	3.12935	3.10026	2.92176	3.06419	3.26267	2.937	2.78256	3.1528	3.60452	3.36462	2.90658	2.71098	2.82456	3.62599	3.78187	3.14788	2.9997	2.9017	3.64453	3.19164	3.06483	3.23666	3.58487	3.38229	3.36368	3.23711	2.64892	2.08279	2.92352	chr1	143750790	143777068	26279	-	HAVANA	gene	NA	NA
ENSMUSG00000018209.15	protein_coding	Stk4	8.87709	9.03205	9.06316	8.33242	8.39176	9.10073	9.20371	8.50369	8.48959	8.33193	8.77764	8.62887	9.17832	8.69527	8.63821	8.60884	8.56089	8.52648	8.52031	9.02707	9.01935	8.55478	8.61235	8.42969	8.48155	8.46108	9.10843	9.46006	9.48038	8.68857	8.78162	8.70584	8.42968	8.47063	8.41064	chr2	164070322	164155524	85203	+	HAVANA	gene	NA	NA
ENSMUSG00000018286.6	protein_coding	Psmb6	5.99106	5.9747	5.96251	6.2587	6.00301	6.29008	5.98185	5.7855	6.16046	6.20484	6.15129	6.5089	6.05828	5.68125	5.84718	5.75405	6.30203	6.4674	6.45594	4.9292	5.15558	6.31283	6.33386	6.1117	6.28945	6.1814	6.38376	5.63482	5.51967	5.48787	5.48607	5.54765	6.43465	6.37113	6.34237	chr11	70525367	70527858	2492	+	HAVANA	gene	NA	NA
ENSMUSG00000018287.12	protein_coding	Spag7	4.2217	4.08682	4.11142	4.4862	4.16001	4.74679	4.32307	4.23038	4.30911	4.5907	4.53065	4.83393	4.5123	4.02345	4.21807	4.32555	4.49724	4.76572	4.81812	3.57118	3.70811	4.5586	4.61747	4.12114	4.21218	4.41064	4.8387	4.35741	4.4728	3.72834	3.635	3.91624	4.52905	4.55713	4.41144	chr11	70663771	70669416	5646	-	HAVANA	gene	NA	NA
ENSMUSG00000018293.4	protein_coding	Pfn1	9.51809	9.42291	9.33151	9.56841	9.5289	9.87063	9.68546	9.45355	9.58463	9.51366	9.99465	10.237	9.60823	9.4341	9.47251	9.38396	10.0034	10.145	10.1257	8.96714	9.05472	9.93258	9.97405	9.5102	9.54116	9.4949	9.89579	9.38217	9.35087	9.34101	9.35282	9.38197	10.1091	10.1621	10.0263	chr11	70651850	70654644	2795	-	HAVANA	gene	NA	NA
ENSMUSG00000018322.10	protein_coding	Tomm34	5.97077	6.00131	6.0515	6.12646	6.07182	5.74082	5.7803	5.94995	5.97033	5.92959	5.79452	5.81308	5.40935	5.98149	5.93066	6.05651	5.92168	5.86169	5.83316	6.07469	6.01529	5.78842	5.89053	6.02092	6.10637	6.03573	5.94136	5.65461	5.69043	6.05947	6.01983	6.05414	5.8764	5.99228	5.89237	chr2	164053540	164071169	17630	-	HAVANA	gene	NA	NA
ENSMUSG00000018326.9	protein_coding	Ywhab	7.0877	6.44989	6.49702	7.83842	7.65941	7.81863	7.56063	7.46464	7.61715	7.79098	7.98846	8.16917	7.70522	7.55997	7.57458	7.57375	8.01538	7.94088	7.99009	7.01394	7.13729	7.93701	7.77905	7.73637	7.73121	7.67738	7.89987	7.47554	7.39242	7.51589	7.49104	7.53862	7.97045	7.92402	7.9748	chr2	163994960	164018588	23629	+	HAVANA	gene	NA	NA
ENSMUSG00000018334.17	protein_coding	Ksr1	4.39821	4.49801	4.33812	4.87793	4.62062	4.31327	4.52612	4.33243	4.57098	4.65701	4.62826	4.82227	4.61674	3.92482	4.11143	4.14651	4.30377	4.27064	4.36531	4.08797	4.03046	4.45811	4.56093	4.89667	5.00965	4.84861	4.65426	4.35383	4.47587	3.77563	3.64796	4.07689	3.95329	4.25666	3.93227	chr11	79013440	79146407	132968	-	HAVANA	gene	NA	NA
ENSMUSG00000018340.13	protein_coding	Anxa6	8.52673	8.8126	8.76547	8.26587	8.01076	8.9797	8.67148	8.07317	8.21593	8.0977	8.84263	9.11279	8.64074	7.78013	7.7878	7.67027	8.55564	8.71309	8.66102	7.27948	7.30034	8.49394	8.48702	8.29936	8.31802	8.30784	8.90702	8.54539	8.52436	7.31206	7.50979	7.47785	8.54646	8.57905	8.49519	chr11	54979108	55033445	54338	-	HAVANA	gene	NA	NA
ENSMUSG00000018341.12	protein_coding	Il12rb2	4.29947	2.6144	2.46539	6.66684	7.26416	7.30954	7.44206	5.99314	6.3899	6.47328	6.62997	7.25691	7.1994	4.6698	4.99463	5.05541	6.47675	6.98992	7.24626	1.17287	2.43933	6.71176	6.33993	5.75661	5.92708	6.42726	7.07216	7.09496	7.24485	4.56744	3.75473	4.5468	7.03069	6.72141	7.02341	chr6	67291318	67376188	84871	-	HAVANA	gene	NA	NA
ENSMUSG00000018347.16	protein_coding	Zkscan6	4.54523	4.78407	4.67213	4.24691	4.47298	4.44732	4.38199	4.43531	4.43141	4.25615	4.35882	4.45354	4.43556	4.42845	4.35007	4.34842	4.44672	4.41913	4.31111	4.47141	4.33061	4.29362	4.2336	4.23322	4.28148	4.3712	4.3274	4.55286	4.70221	4.08438	4.38065	4.36841	4.09685	4.26375	4.37973	chr11	65807175	65829239	22065	+	HAVANA	gene	NA	NA
ENSMUSG00000018362.14	protein_coding	Kpna2	6.70172	6.01501	6.2995	7.55697	6.54185	8.2511	7.83941	7.04246	7.45939	7.24851	8.23502	8.59621	8.06508	5.89323	5.93652	6.37851	8.49163	8.44138	8.5246	4.46635	4.89541	8.19666	8.06362	6.89114	6.73379	7.33041	8.36263	7.76506	7.65798	5.30598	5.33307	5.40147	8.37562	8.27902	8.31752	chr11	106988629	106999541	10913	-	HAVANA	gene	NA	NA
ENSMUSG00000018363.16	protein_coding	Smurf2	5.93962	6.09538	6.19241	5.76444	5.89099	5.42126	5.13507	5.99104	5.86342	5.96279	5.71714	5.50855	5.30188	6.01498	5.87442	5.88721	5.63629	5.39793	5.48588	6.11236	6.04662	5.65687	5.52647	6.01994	5.99388	5.77949	5.4915	5.39707	5.51222	6.12484	6.03963	6.08754	5.59429	5.67354	5.62122	chr11	106820066	106920715	100650	-	HAVANA	gene	NA	NA
ENSMUSG00000018372.13	protein_coding	Cep95	4.92677	5.03432	5.07017	4.63807	4.70475	4.92691	5.18142	4.71622	4.77291	4.5287	4.83491	4.43072	4.93189	4.81421	4.56875	4.93011	4.623	4.56281	4.69443	5.1533	5.24398	4.73058	4.84218	4.75138	4.71905	4.78539	4.90379	5.41265	5.53151	4.85681	4.77846	4.77208	4.39655	4.44932	4.45469	chr11	106789252	106819930	30679	+	HAVANA	gene	NA	NA
ENSMUSG00000018377.10	protein_coding	Vezf1	6.3189	6.29945	6.35197	6.22433	6.11849	6.36954	6.36079	6.41691	6.37544	6.15892	6.34498	6.34971	6.37501	6.33513	6.30983	6.39305	6.21237	6.09995	6.25313	6.62743	6.63234	6.33163	6.36359	6.25053	6.22837	6.21692	6.25913	6.38998	6.36951	6.4649	6.45354	6.515	5.998	6.04878	6.13958	chr11	88068279	88084729	16451	+	HAVANA	gene	NA	NA
ENSMUSG00000018379.17	protein_coding	Srsf1	8.96125	8.83937	8.80688	9.46643	9.19101	9.18321	8.763	9.0873	9.1711	9.4124	9.30669	9.53291	9.01416	8.92768	8.94569	9.05052	9.50317	9.39063	9.5131	8.2971	8.51872	9.36936	9.1296	9.2244	9.15976	9.30209	9.21207	8.74796	8.61494	8.71702	8.58802	8.86459	9.30978	9.17381	9.49149	chr11	88047373	88053755	6383	+	HAVANA	gene	NA	NA
ENSMUSG00000018381.15	protein_coding	Abi3	4.3655	4.99991	4.99515	3.64427	3.77938	3.8005	3.89658	3.9098	4.04381	4.05269	4.18745	3.87645	3.68801	3.40833	3.42614	3.30092	3.83321	3.49169	3.80865	3.50423	3.41659	4.25046	3.98696	3.88618	3.72793	3.815	3.60706	3.6638	3.81335	3.36866	3.14821	3.58267	3.98215	3.93737	3.63258	chr11	95830074	95842476	12403	-	HAVANA	gene	NA	NA
ENSMUSG00000018398.18	protein_coding	8-Sep	3.74297	4.45888	4.96083	3.09256	2.44285	3.39269	2.86593	2.7791	3.26974	3.33735	3.30756	3.15071	4.61914	2.20025	2.07308	2.69049	3.00023	2.80019	2.69511	1.87162	1.66799	2.74561	2.45934	2.98411	2.64937	3.15638	3.43731	3.09707	2.80548	2.30767	2.2292	1.95297	2.47583	2.78095	2.49672	chr11	53519257	53549565	30309	+	HAVANA	gene	NA	NA
ENSMUSG00000018401.17	protein_coding	Mtmr4	5.74367	5.90596	5.80008	5.83812	5.55725	5.67311	5.30837	5.77377	5.85016	6.06855	5.96845	6.01495	5.81222	5.41153	5.30735	5.3693	5.82611	5.69193	5.74903	5.54327	5.37573	5.70538	5.59776	5.81005	5.88924	5.60871	5.84302	5.29148	5.41971	5.23392	5.2084	5.24769	5.71048	5.82262	5.77051	chr11	87592162	87616302	24141	+	HAVANA	gene	NA	NA
ENSMUSG00000018405.7	protein_coding	Mrm1	4.07729	4.44764	4.40578	3.90885	3.97796	3.19679	3.11204	3.86084	3.94553	3.62971	3.6704	3.70551	3.19674	4.0325	3.84383	3.83619	3.73875	3.91198	3.61488	4.24503	3.97843	3.71995	3.83446	3.88845	3.44421	3.81983	3.57155	3.00962	2.59597	4.34484	4.1632	4.1328	3.89554	3.56854	3.89687	chr11	84813061	84819515	6455	-	HAVANA	gene	NA	NA
ENSMUSG00000018412.16	protein_coding	Kansl1	7.1561	7.01967	7.13402	6.91015	7.21649	7.09182	7.23468	7.30612	7.20678	7.17144	7.34799	6.9933	7.57781	7.42376	7.41179	7.32011	6.98915	6.96025	6.92153	7.7226	7.57869	7.01358	7.15871	7.15943	7.29792	7.08574	7.11536	7.27663	7.31876	7.54484	7.63792	7.58445	6.96923	6.98802	6.99639	chr11	104333229	104468861	135633	-	HAVANA	gene	NA	NA
ENSMUSG00000018415.14	protein_coding	Gid4	5.30817	5.14684	5.18934	5.74808	5.67381	5.31302	5.20201	5.75799	5.68785	5.97587	5.41147	5.24489	5.14591	5.61049	5.63127	5.60464	5.32527	5.38881	5.3174	5.32462	5.4226	5.14533	5.25656	5.65391	5.79101	5.58504	5.29363	5.17755	4.95167	5.52432	5.46426	5.48816	5.3111	5.43688	5.47883	chr11	60417145	60450927	33783	+	HAVANA	gene	NA	NA
ENSMUSG00000018425.18	protein_coding	Dhx40	5.54897	5.55571	5.57678	5.23374	5.38344	5.93185	5.96026	5.25379	5.39326	5.38171	5.47297	5.58634	5.95475	5.54875	5.60982	5.56473	5.16722	5.19007	5.24697	5.65949	5.75638	5.37137	5.19981	5.34798	5.30232	5.42981	5.91108	6.02472	6.07513	5.72557	5.7582	5.69111	5.29257	5.1498	5.43938	chr11	86768846	86807746	38901	-	HAVANA	gene	NA	NA
ENSMUSG00000018428.15	protein_coding	Akap1	3.42921	2.89867	3.01972	4.89393	4.50846	4.05407	2.73643	3.76933	4.31138	4.74482	4.76866	5.02212	3.9961	3.43806	3.56605	3.41502	4.61764	4.92025	5.0242	0.862781	1.42655	4.3481	4.19217	4.38956	4.51359	4.75507	3.95404	2.74006	2.58465	2.95929	3.00929	2.97691	4.87619	4.72064	4.67969	chr11	88830792	88864586	33795	-	HAVANA	gene	NA	NA
ENSMUSG00000018433.14	protein_coding	Nol11	5.93748	5.79691	5.80649	6.65896	6.31161	5.65352	5.39318	6.04382	6.37271	6.56445	6.17032	6.5424	5.73125	5.96149	6.05591	6.04055	6.43603	6.51729	6.49579	5.28046	5.34304	6.36259	6.18343	6.37716	6.47345	6.45077	5.79006	5.21536	4.93839	5.83231	5.80812	5.93339	6.54049	6.38583	6.48032	chr11	107166663	107189381	22719	-	HAVANA	gene	NA	NA
ENSMUSG00000018442.13	protein_coding	Derl2	5.7743	5.72138	5.62558	5.70385	5.90461	5.82677	5.88696	5.8939	5.83524	5.78777	6.04672	6.08068	5.89403	5.79142	5.71255	5.80041	5.94828	5.93279	5.92899	5.91798	5.97636	5.96688	5.82006	5.84857	5.65294	5.76165	5.87901	5.78114	5.67082	5.90499	5.92793	5.89149	5.96992	6.01374	6.04527	chr11	71007164	71019841	12678	-	HAVANA	gene	NA	NA
ENSMUSG00000018446.8	protein_coding	C1qbp	5.74033	4.86477	4.82299	7.36994	6.93184	6.58719	5.96989	6.64105	6.97323	7.19438	6.76453	7.24661	6.44551	6.33513	6.59759	6.52583	7.01028	7.18581	7.20585	4.87083	5.41434	6.96168	6.83039	6.87622	7.12438	7.12639	6.69452	5.687	5.46825	6.26234	6.16888	6.23745	7.26553	7.17732	7.22682	chr11	70977836	70983026	5191	-	HAVANA	gene	NA	NA
ENSMUSG00000018449.12	protein_coding	Rpain	3.89359	3.92253	4.12059	3.88792	3.76957	4.09095	3.8463	3.80048	3.83273	3.62971	3.77	3.60942	3.74024	3.72718	3.85299	3.92147	3.69868	3.70493	3.64148	3.96581	3.76118	3.84791	3.67704	3.61607	3.79955	3.80169	4.19844	3.86298	3.88163	3.66946	3.635	3.66133	3.46376	3.61363	3.52015	chr11	70970213	70977833	7621	+	HAVANA	gene	NA	NA
ENSMUSG00000018474.17	protein_coding	Chd3	8.84104	8.83393	8.78017	8.56092	8.59515	9.21404	9.30518	8.91472	8.85913	8.65017	9.15397	8.72119	9.3987	8.9181	8.70306	8.76325	8.92937	8.66171	8.78193	9.10523	8.98544	8.7092	8.74911	8.74916	8.66392	8.63887	9.22471	9.67845	9.71808	8.63829	8.6625	8.59202	8.55465	8.67424	8.52623	chr11	69343273	69369406	26134	-	HAVANA	gene	NA	NA
ENSMUSG00000018476.7	protein_coding	Kdm6b	5.35588	4.27727	4.33331	6.63257	7.30727	5.57608	5.25814	6.92716	6.94437	6.65882	6.23457	5.8439	5.84307	6.89323	6.70425	6.70974	6.11815	5.88358	5.56085	7.23458	7.10326	6.30959	6.30202	6.99033	6.77486	6.67827	5.38282	5.20925	5.26311	7.16611	7.21088	7.18507	6.37955	6.43652	6.28505	chr11	69398508	69413675	15168	-	HAVANA	gene	NA	NA
ENSMUSG00000018481.9	protein_coding	Appbp2	6.20476	5.82821	5.94197	6.74732	6.58797	6.43412	6.26228	6.46509	6.51289	6.75251	6.53734	6.74562	6.47116	6.41256	6.33538	6.38359	6.70552	6.72936	6.72302	6.32191	6.31412	6.61206	6.56176	6.68374	6.72977	6.57098	6.46507	6.43798	6.29072	6.28212	6.33635	6.49202	6.60647	6.56296	6.70804	chr11	85187262	85235130	47869	-	HAVANA	gene	NA	NA
ENSMUSG00000018501.17	protein_coding	Ncor1	8.70866	8.57321	8.5858	8.63891	8.78888	8.92164	8.87076	8.69405	8.77307	8.65301	8.80083	8.85261	8.7614	8.83324	8.83738	8.82768	8.82659	8.79776	8.82803	8.9993	9.01505	8.92592	8.91316	8.6949	8.73553	8.75926	8.86174	8.93184	9.02174	8.90898	8.96755	8.89792	8.82209	8.83233	8.81712	chr11	62316426	62458541	142116	-	HAVANA	gene	NA	NA
ENSMUSG00000018507.16	protein_coding	Trpv2	5.95321	6.12795	6.15106	4.86744	4.86842	6.52924	6.86937	5.21096	5.28038	4.74482	6.50344	6.88879	6.34892	5.50227	5.48429	5.32715	5.78244	6.03794	6.17639	5.37549	5.51201	6.06351	5.95958	4.89463	4.93515	5.23233	6.46075	6.53156	6.74485	5.49354	5.45691	5.36517	6.14567	6.00714	5.94098	chr11	62574486	62600515	26030	+	HAVANA	gene	NA	NA
ENSMUSG00000018541.10	protein_coding	Cwc25	4.62456	4.49366	4.41514	4.6752	4.59351	5.07234	4.82581	4.74052	4.80559	4.68695	4.95891	5.03226	4.97801	4.60869	4.64191	4.67745	4.81564	4.79758	4.82973	4.56905	4.60478	4.86122	4.99824	4.68394	4.50718	4.76447	4.98222	5.00124	5.13548	4.68416	4.71213	4.71217	4.76771	4.99651	4.7106	chr11	97745481	97766556	21076	-	HAVANA	gene	NA	NA
ENSMUSG00000018547.8	protein_coding	Pip4k2b	6.63735	6.5714	6.51495	6.60601	6.57129	6.78474	6.57797	6.49813	6.57012	6.49027	6.96583	7.18392	6.69635	6.69641	6.64318	6.7093	6.87298	6.94299	7.07333	6.73263	6.58308	6.87333	6.83246	6.57427	6.68927	6.62357	6.81841	6.48957	6.56432	6.73032	6.71755	6.59015	6.92301	6.89976	6.88448	chr11	97715157	97744704	29548	-	HAVANA	gene	NA	NA
ENSMUSG00000018548.15	protein_coding	Trim37	5.34364	4.98407	5.05829	6.07415	5.62616	5.88746	5.45966	5.65523	5.88116	6.03058	6.09833	6.37517	5.74097	5.32762	5.32556	5.43336	6.14873	6.25	6.2653	4.48259	4.51803	6.05651	5.92108	5.7536	5.81847	5.9353	5.99611	5.14807	4.91824	4.84799	4.80184	5.07768	6.10166	6.0992	6.25942	chr11	87127077	87220683	93607	+	HAVANA	gene	NA	NA
ENSMUSG00000018559.16	protein_coding	Ctdnep1	5.21548	4.51689	4.49133	6.04451	5.95667	6.06202	6.07631	6.04488	5.98468	6.00166	6.06094	6.19804	5.92699	5.70692	5.69123	5.7393	5.94113	6.12606	6.11365	5.41493	5.5256	6.01541	5.92401	5.93547	5.90518	5.94153	6.11724	5.93154	5.8748	5.65399	5.70958	5.73693	6.11648	6.16883	6.01302	chr11	69981156	69990601	9446	+	HAVANA	gene	NA	NA
ENSMUSG00000018565.17	protein_coding	Elp5	4.48144	4.31429	4.31284	5.10362	4.85471	4.57778	4.41764	4.73246	4.94413	5.14269	4.62432	5.02889	4.62807	4.51494	4.59901	4.48739	4.72877	4.63072	4.62504	3.95514	3.80823	4.66054	4.59074	4.97743	5.2321	5.06939	4.66686	4.23657	4.11981	4.36354	4.62306	4.53675	4.80478	4.68411	4.80912	chr11	69968222	69982517	14296	-	HAVANA	gene	NA	NA
ENSMUSG00000018567.14	protein_coding	Gabarap	6.26597	6.41362	6.32226	6.05393	6.1876	6.29484	6.46497	6.21205	6.20768	5.99983	6.23952	6.24094	6.17709	6.04436	6.17664	6.2187	6.05463	6.12056	6.05219	6.06975	6.15271	6.12052	6.26099	6.06134	6.22349	6.06359	6.1947	6.35009	6.49043	6.14659	6.13936	6.09694	5.99342	6.11104	6.02742	chr11	69991143	69994951	3809	+	HAVANA	gene	NA	NA
ENSMUSG00000018572.10	protein_coding	Phf23	5.63828	5.53157	5.70575	5.60792	5.86841	5.4067	5.48676	5.81345	5.75213	5.55346	6.0045	5.72515	5.88385	5.62253	5.56035	5.69537	5.64422	5.71402	5.66941	5.57496	5.68127	5.70736	5.72163	5.54817	5.3479	5.60086	5.59629	5.51146	5.50173	5.55446	5.61705	5.71268	5.78659	5.85349	5.72833	chr11	69995777	70000009	4233	+	HAVANA	gene	NA	NA
ENSMUSG00000018574.14	protein_coding	Acadvl	5.73692	5.95053	5.93989	5.47435	5.56266	5.67639	5.30932	5.338	5.54224	5.53845	5.65133	5.71759	5.47413	5.47377	5.58832	5.53495	5.82119	5.6313	5.6747	5.00709	5.08544	5.79136	5.62726	5.50625	5.64027	5.81884	5.68674	5.25931	5.17743	5.40941	5.4625	5.3056	5.70615	5.72443	5.69939	chr11	70010183	70015411	5229	-	HAVANA	gene	NA	NA
ENSMUSG00000018583.5	protein_coding	G3bp1	8.23721	7.96903	7.95562	9.14539	8.71359	8.44164	7.86878	8.53406	8.71922	9.04363	8.75277	9.06222	8.3623	8.27825	8.38269	8.31147	8.89429	8.95955	8.90381	7.56355	7.75687	8.73113	8.644	8.87784	8.93508	8.92809	8.52699	7.8126	7.56174	8.01814	7.99818	8.07773	8.87683	8.82738	8.87709	chr11	55469685	55504838	35154	+	HAVANA	gene	NA	NA
ENSMUSG00000018585.9	protein_coding	Atox1	4.16	4.66014	4.6938	3.29692	3.24664	3.90462	4.1303	3.46354	3.44591	3.61546	3.83958	4.26571	3.99955	3.45835	3.5716	3.40258	4.16727	4.07361	3.96302	2.98486	2.95991	3.73561	3.55665	3.42867	3.14696	3.4464	4.09819	3.96371	3.93608	3.12912	3.33191	3.38258	3.99054	3.96634	3.67448	chr11	55446641	55461239	14599	-	HAVANA	gene	NA	NA
ENSMUSG00000018599.5	protein_coding	Mief2	3.51483	3.99272	3.92512	2.79567	3.30161	2.97006	3.12935	3.14342	3.16784	3.01439	3.5757	3.41123	3.53723	3.12768	3.24971	2.9346	3.20004	3.09762	3.15507	3.21679	3.08173	2.97398	3.22498	2.91857	2.93393	2.71759	3.30221	2.95108	2.97111	2.70946	2.793	2.73343	3.05276	2.94871	2.92352	chr11	60728398	60732951	4554	+	HAVANA	gene	NA	NA
ENSMUSG00000018654.17	protein_coding	Ikzf1	9.30612	9.36584	9.2992	9.06718	9.08117	9.59691	9.53069	9.30846	9.2366	9.17985	9.31794	9.21279	9.7106	9.40008	9.43144	9.28253	9.2716	9.18362	9.12262	9.1857	9.14483	9.06534	9.11464	9.05887	9.09467	8.99331	9.67533	9.78942	9.60614	9.31823	9.34836	9.35431	9.05368	9.08404	9.12985	chr11	11685003	11772926	87924	+	HAVANA	gene	NA	NA
ENSMUSG00000018659.12	protein_coding	Pnpo	4.45938	4.79819	4.72035	4.534	4.36732	3.69678	3.44752	4.38594	4.40043	4.49501	4.34391	4.16701	3.8147	4.20684	4.27638	4.26765	4.15544	4.28543	4.19134	3.77511	4.03869	4.19182	4.07416	4.36128	4.67484	4.45188	3.98821	3.62837	3.72363	4.13073	3.966	4.04101	4.26773	4.40428	4.35052	chr11	96937825	96943986	6162	-	HAVANA	gene	NA	NA
ENSMUSG00000018661.17	protein_coding	Cog1	5.35231	5.61257	5.66928	4.8043	5.02189	4.8491	5.01184	5.12982	5.17235	4.70823	5.00602	4.87486	4.80351	5.31649	5.22059	5.29498	5.05416	4.9551	4.87383	5.47673	5.48719	5.01029	5.10884	5.05602	4.95796	4.99212	5.01802	4.85657	5.04613	5.30146	5.40709	5.45283	4.81536	5.22194	4.73281	chr11	113649169	113667054	17886	+	HAVANA	gene	NA	NA
ENSMUSG00000018666.13	protein_coding	Cbx1	6.04324	5.781	5.89465	6.43919	6.14691	6.58137	6.31427	6.21855	6.28504	6.4148	6.41104	6.58149	6.29739	6.00812	5.86426	6.10433	6.57878	6.56088	6.69374	5.6313	5.65487	6.42451	6.25094	6.29802	6.05891	6.39763	6.72245	6.07454	6.05579	5.88717	5.74921	5.8357	6.50553	6.44316	6.4668	chr11	96789127	96808640	19514	+	HAVANA	gene	NA	NA
[truncated: 7,835 more rows]

## Sheet: Table S2
Table S2. Differentially expressed genes (logFC > 1, p < 0.05) in day 1 activated WT T cells relative to freshly isolated WT T cells.
[truncated: 1,562 more rows]

[truncated: 9 more sheets: Table S3, Table S4, Table S5, Table S6, Table S7, Table S8, Table S9, Table S10, Table S11]
